# Supplementary material for: Genome-Wide Analysis of the Cytochrome P450 Monooxygenases in the Lichenized Fungi of the Class Lecanoromycetes
Source: MDPI journal article supplement (doi:10.3390/microorganisms11102590), 2023-10-19
Supplement: s1 [file s1]

# Genome-Wide Analysis of the Cytochrome P450 Monooxygenases in the Lichenized Fungi of the Class *Lecanoromycetes*

Gugulethu Mlambo <sup>1</sup>, Tiara Padayachee <sup>1</sup>, David R. Nelson <sup>2,\*</sup> and Khajamohiddin Syed <sup>1,\*</sup>

<sup>1</sup> Department of Biochemistry and Microbiology, Faculty of Science, Agriculture and Engineering, University of Zululand, Vulindlela, KwaDlangezwa 3886, South Africa; gugulethumlambo75@gmail.com (G.M); tee07padayachee@gmail.com(T.P.)

<sup>2</sup> Department of Microbiology, Immunology and Biochemistry, University of Tennessee Health Science Center, Memphis, TN 38163, USA

\* Correspondence: drnelson1@gmail.com (D.R.N.); syedk@unizulu.ac.za (K.S.); Tel.: +1-901-448-8303 (D.R.N.); +27-0359026857 (K.S.)

## Supplementary Dataset S1

P450s identified and annotated in *Lecanoromycetes* are presented with their assigned name, followed by protein ID from the Joint Genome Institute MycoCosm database and species code. P450 fragments and partials identified in *Lecanoromycetes* are also listed.

### *Acarospora strigata* CBS 132363

>CYP531P1|119065|Acastr1

MAILGLLFQALLGVTALFITNLLWTYYNSPLKPIPGPFLAKFSNLWRFFDVWDGRSELTLMRLHAKY  
GSAVRIGPNVVSLSDPRLIKTIYSTRGEYLYKSEFYKVNNDVKSGNAIVSNMFSTLSNDYHAMQLKPIQR  
HYTLNALMDFEPLVDKTIDTFRQEMEKRFVGPVKVCIIGDWLLYCATPTLGVKEIAWDVIGEITFSQ  
PMGFLKTGADVEHILSGADTSLDYFSVIGQIPRLDFLDKNPIHRIGPPSFGTVVTMSIQRTIARINGT  
DQHSAGTQKDFLDQFIEKKKEAAWIDDNQVVGWLCINMFAGSDTTAITLRAIVYFVLGSDTTAITL  
RAIVYFVLKNPHVHRKLHQELDAANLPMRISYKAAQSLPYLGAVIEEAMRMHPAVGLLLERVVPSS  
GLTLPDGRFIAPDTIVGLNAWVVHQDKTVFGQDADSFNPERWLQGPDETVTEFQNRSRMRMREANL  
TFGAGNRVCLGKSLSMLEIYKFIAITLFLNYQMELVDPKWEHVQNSWFVRESGMDVTIKRREELSG  
\*

>CYP677J1|119344|Acastr1

MLILNIYLIQIAVTAISIYLVGWIIYSRYFHPLHSIPGPFLASISRAWIIFKTMTGDMHEHTQRALHKKHG  
YLVRIAPNEVACSDPEAIKIIYGTKIVFTKTDIFYDAWAPPNNGYVGHFPARDEKEHSERRRIVNNVY  
SMSSVLESEKAIDSCTQVFCETMRDFAKQKSVVDLGLWINMYAFDVLGVLFYGKTFGFMNERTDV  
GNYMKAIDSLLPAFTIGGTVPSTYTKLYLISTILFSPSIRGALGAVKRLESASEAAVKRRKQEMEENKD  
DKRDLLRKMLEIDADRGQKINFTFPHICVESHSIFAGADTTAIAINSILYHLMRNTAAYEKLTAEID  
TAVADGTLSPVAYAEAVKLPYLKACINEGMRLHPSVGLTMPRLVPAGGATISGDFDPEGYRIGIN  
GAVVQYDKDVFPGPADNFNPNRWIEGDSVRMDKTMIFGGGPRTICIGKNLSAGLCIDFRMYANIS  
LSEIYKLIPQIVRVFHIRLVDLSKEWKTHNYWFNKQTGVYIYIKERAHESRYRDRDPSRAG\*

>CYP6588B1|118707|Acastr1

MDTALTSLPLWQLQIGGFVAVLAAFLALRVVQYRYQLTQTRALPVADVKEGNWKEAISCASAKYP  
DAPWILPTDPPRVLPNSVMDEVRFLENQSLRKEVYKKMHGRYTDLGKDHVPVGMEAIKTDLTN  
NVGRMLPDLQEETIYALEREIGRCPGWTKVALYDKLLQLSALVNGRMFVGLPLCRDQTWIDMSIKY  
TLDMVYGIRAVQKVNPLLRPLKAPWLSEIRNLAGEYKKRAAQMLRPHIDEAVEARKASYNLITWML  
NQMKDVDYELLASEQIFASFGAIHATCITVTNALYDLAAYPQYVAELRAEINDVVALEPDYRLRKA  
ALPKLMKLDNFLRESQRMNPGNITSIQRIVTARNGIKLSNDFITPHGTSIGFLHPLAPFVHPAPNLVPT  
VDRIPNQPPLESEFYPRFHSEVRSLPGQMNYHQFAMTAQDNITFGHGPSCPGRFFAGAEVKVILVEI  
LRRYDVALGPNGETDGGGEKGFKRPTNIIPLGSLQCVPDFTKMIYFKELKVVLPTTPKSES\*

>CYP6582B1|119656|Acastr1

MPFLILGPIVRFAPNSLSFNTASAVESIYSSRKANSASDQWYQCVRDSAGGFVSTFTVIDPVRHATKR  
RLLSHAFSSEALRSMPCIVGHIWTVIECLGLKLESASRHEWGSSELDIGTLTNMLIFDILGDLFCGKSF  
DMMKSPEHRFLVPLIPQATRGWYTVSRFSLPYLALNGLLVALCVLTYCPTHQLGYHPYTHLLRYILF  
KTPLGPRYILFKTPLGVLGGKTFEDNRIFRAFCTKALKARRQAENCTNGNLTSASSKGVKRDIFHY  
LLHGKDPETGRGYAVGELECESVLLMVAGSESTSTAVAASIYYLIHNSDALEKLTLEVREAFASRDEI  
RYEAGGKLMNLPYLRACLDLRLTPSTPGHLPREVLRGGMLVDGEWIPSGTNV GASAYALHRNE  
AYYPHADQFRPERWTCEEVRSGKGEAVTAREAFWAFSSGPTGCIGKHLAYMELSLAVAALSWSFDI  
RAAESTRAMEQDSTARNVKHNASEFQVKDVFVGVGEGPVVQLRRR\*

>CYP544C1|119945|Acastr1

KPPNTLPILGNLLFLQARHKLQWFTQCECRFGLETFEISVPTLPPGVVINDPKNLEFVLRDDVFT  
KGEFFRRRSWDLFGYGIINADGDLWKVQRKAGQRRFSPANLKSLLVDVVLPLHLADTRSIFYQQARE  
RRRVLDLQHVFLDFTTRLMGKLAYDMDMQASSTFSEAFDFASGAIGERFQNPFWRLTDLFFGARLRR  
AVSEVKRFRGSIVAAAVQRRSGKILEGDKDNSTYSNSISGSLINFLMDGISDHEIVADAALNYLSAGR  
DTTAQSLTWTFYLLMRHPDIAQNVRNELRTLFPQGKVIHLSSANLPQPSSLPYTMAVFYESLRLHPP  
VPFEIKQCETATTLPDGTFLPQGSVIVSCIWAMNRSKTSWGPDADCFRPERWLEEDFDNTLENHPE

GGKSEEKRWKVTSKTASEFPVFHGGPRSC LGRKMAELLGVYVIASLFWEFDFEEDKDKEEARERS  
KNSLTLPMEGGLPCYVAVREQIF\*

>CYP5039D2|120184|Acastr1

MSSITEISGHLPLSSIPSLNLIPTIALACTVYLVILGIYRVYLSPLSKFPGPKLAGSDVVSQALTTLYQAY  
YDMYHYGQFFKKLDQLHQEYGPIVRVNPHELHVCDPEFIDVLFTGNSQRRDKYKWIGRSILLPDST  
VATISHELHRKRAALNPYFSKASIRRLPEVQQTLANLLDRMTQCGRDREVIPMSVVYKATTSDIIT  
GYSFGESTEYLRKREDYNEPFFSAVDANFAMAWPMTYIPWLGPLLSVIPPSVMGLVYPGLKSLWDMH  
GQWSKQIDEIRNSKDISSDATVFHGLLNSSLPPCEKEPGRMRQEAQLVVLAGQDTTAQTLSATTYEL  
LANPDKLKKLQVELAEALPDPDMVPTSAIVEKLPYLSAVIQEGLRLHPGALTRMTRVAPDKAMIYD  
DKNGRKQWVIPAGVPVTMTARTVQMNATYFPDPDKFEPERWLDNARLDKYLLAFSKGTRICLGF  
HLAYAELYLILAGIFRKYELYDGTGNQQSPTLALYDTRERDIDPVIDLVVPYPAKGSHGLRLAVHA  
\*

>CYP6196B1|120822|Acastr1

MLYIVTAPKDVAEVYKKADILAWDGHNLNQLFLNFGFNAESLKRAWLKP AHIDSRYKTVNPHQLSL  
IHLVESIYAKQLLPGVHMDMGKGFVAALQAALRLPNLKVCSIDKNIISNLLAFSENAWMLFYGLP  
SFFASAVLTPQSAVLATFQQFADLPESLRNDQSWSVQQILIAQECVGIDLSRACMLLMILWAANS  
NVNNTAFWVLTHILFDEQLRKAVQQEVNAAWKSEQLDVKFLCANATVLDRTFHECLRLKAGAM  
MGRKVLAPTRIGNKMLKPGGTVLIPSRQLHSNPVWGPDEHEHFAETRF AKNEGAETRF AKNEGLL  
KHSSYPFGGGRRLFALVAILHRFDVKLNQDLHQEFRLNVSTPALGVTGPAKGMDILVELSHVEK  
NT\*

>CYP5328E2|120823|Acastr1

MSAPLVDGRTPDVQVMKVQEPVFLGLIWGGLALAIICCSLRFLARIRTFKKLLIDDYFVLLALAFLL  
ANAIIWQIYARQMYIMTVAAGLEMPGEGFAPLAESYAPLAESYFKATVAVIILFYSALWSIKVSFLL  
FFKRLGTNVRGQKVIWWPVLGITLATYFACVGTIQYSCLVSSFEYLAANCRTPAATSFQQITLKLNC  
AWDVTTDCLIMFIPFMSMLRGVQMKWRRKAALSGIFSLVIITMVFAIVRTALVGSSNTDQPDSSWLYM  
WSAIEASIAIIVACLATFRNLFSRETTTRHKLEKPAVPASSNLFLGGNGRRNKIRDILDSLAMPDHAH  
SGYQQQNENTSDAQSISNHHNHVVTIGVLESCSLYVVSCPHPLLSVLLPHFSPPYPLIFPRPRHKVLM  
PYPLFVLVPLALSGLTVLYVLYGLLVNYNAARKTGLPLIVLPFDCGNPLWLIIDRKIVQLVRRIPFCSG  
TFTRFNWRGWEIWDYRAHQQLGDAILFVTPGKNYLQLCDAEAVSELCDAEAVSEIFQRRADFPR  
PPESTGKGLAHTQPPESTGKGLAHTQLKDIHNGLLEMLNIFGPNVGTDDGRQWQRHRRITASSFNE  
HVVHQRVWIESILQSTGLIHYWSRKSSVDSVATDTRTVSLHVMGSAIFGKSYPFGRGAEDNSSTKEDSS  
SYGEALRIILDRCIPLVLVLRKNLKHMTQAYEGEKRAMMRNDKLENNLMTSLVRASQANVDQKG  
STTESHQEGLTEEEVYGNVVFVNFAGHDATANSLTIGICLLATRPDIQDWIAEEINAVLAGFDSKESS  
YEAAPRPLPRCLAVVFETVRLYTAVAIKSTGSSPQPLKLGASTVLIPKNTVIIPNYSALHTHPRYWG  
HDSLEFEPSPRWIIPDPHISTTNGYQASSHPVEHLKELPTRNSPFVWWSGGARSCPGRKFAQVEFVG  
LVGLFRDFKVKPVALKGEDDGMARARLLDQIRTDGTGMRLLLQMLHPERAVLEWSRR\*

>CYP5077D2|120901|Acastr1

MSSSYSLLHSGDVLTKAALLVTFLTVLYGLYHVSRSYLKLAHVPGPFLASLSNLSRVSWVLSKRAH  
EIHIELHEKYGDLVRFGPNMVSADPAEPTIYPMRPGFVKSDFYKVLLPYSKGKSLPSLFGTADENI  
HKALKRPIAPIFSLSNVVSFEGYVDSTIRVLFEQLDNRHVQTGDVCDFGAWLQMF AFDVMGELTFS  
KRLGFLESGKDVDGVMRMIWEHFKAAPVSQMPWIDRFWNKNPLLAYLRPSSASPILKFASTRAK  
ERMDLEKDPDQEKPELNNRDFLSRFIEAQSKDPQVPEWAVTVWTFSNITAGSDSTAVVLRTVFYNL  
LKHPTTLRRLQAELQD TARQGRLSLPCTWKETRDLPYLDACVKEGLRMHPPFGLPFERVVPSSGGAT  
ICGQRFEEGTVVGMSAWVANRHKGTFGEDADVWRPERWLCEENPSIKNYS\*

>CYP6992B1|121136|Acastr1

MAFEYFSQLTLFVPLSLLVYFVYTKLTSKPLIPEHVPWVGRRSEFFSKGRANLRSFTRGRELLDDAY  
YKFSKHGLNCVLPTFQGGEVLIPPAQIPWLLSQPEHVLNTKEVHRDSLEADYTMLNEKIVRSPVHE  
DVIRRDLTRQLGNLTMDIMQELVAMDIMQELGSGFDEYWGYDTENWKEACVYENMMKIIARTSN  
RVIVGLPLCRNEDFLRNVAKFSQDIPLSGQVIKLFPKFLKPLIGPIAVLPNRYHFRQCAKHTVPLVKQ  
RQADMERKRQNPEYKYEEPNNFLTWQIRDAMRRDDPSEQTPEMISHRVLVVNFAAHTSTFTVTN  
TLIDLFSAAPEKGYLEGIREEAQRVLNEDGVWTKAGLAKMIRVDSAIRESMRLSGFSSRGLVRKVIS

DGGVTLEDGLHLNKGTKVGLSAYSVHHDETIFEDPMTYDAFRFSRPREAFATSQDIPIGDLIGDEKP  
LANGTASGTEKGENLTEVLKHKNLSMASTSETFLAFGHGRHACPGRFFAANELKLLIAYMVLNYD  
VKPLPVRPRNTWLGD TVLPPMKATVQVRRRKTEVSG\*

>CYP676A7|122042|Acastr1

MASILPWDALKLLGYLPFVLFIVLLYVVVIAVQRRYFSPISDIPGPFLASVSIFWQIWQIAKGATAKSTI  
KLHEKHGPFVRISHKEVSINHPDAIRA VLLAPLRKGEFYGIMALPDHHHPTPMSE RDPKRCVQRKK  
NVASGYALS NIMTSEKFIDDTIGLLEERLDQLSQANEPVAFDKWFNFMAFDIIGE VTFSTRRFGLFKG  
IDIGGAIANTRILTAYVSVMAHLQWLHRLTLGPIISYLGLEPNQHIFDTAKAAVAARQANEFARTD  
MIEQWKISRRNHPDRMAEQEILDVATATIGAGADTISTTLQAFFYFLLKHPEYLARLQGEIDAANAR  
GELSHVVS YGEAQKLPFLQACIKETFRCHPAVPTGLARIVPEEGLVVAGHRFERGITVSVNSWAIHR  
NPLCFGKTA AHYDPTRWLDPEQASRMDKYMIQFGAGYNSCPGRNLAYLEINKVAATLV RDFDVR  
QVEPGREWRYEEWFTA VPHYGWD CWVRRRVEKGVVTQY GALQVGRGLGR\*

>CYP65FH1|122045|Acastr1

MASAITDNKLISLTPRTLVISSVILQAIYIVYLIGKAVYNVYFHPLSAFPPGPKSFAATRVS HVRSLLRG  
QLSQTVKELHDEYGEVV RIGPDELSFTAAQAWRDIYGHRQGHKSFQKDPV FYGLPPEGVHNIVSTP  
SDADHSRMRRLLAHAFSEKALREQEPLIMSYVD TLVDKLRQHIHGPEGGKMDLVRWYNFTTFDIIG  
DLAFGESFHCLKNKEYHSWVSTIFKSIKFLAYLQVGRRFPPLTEAINFVLPRKLREQRRKRMQYNKD  
RVDKRLELGTDVD RPDFISYILRHNDEKGMSRSEIQACSAVLT TAPDFISYILRHNDEKGMSRSEIQA  
CSAVLT TAGSETTATLLSGVTFHLLSNPDAYKKLVDEVRTTFKDEEEINSIAVGQLPYLNAVLEEGFR  
MYPPTPAAIPRVTPPEGDEICGQWIPGNTIVGINHYAA YRSPQN FALPDIFIPERWLPSTASVSSTAHP  
NIDFSSDSKHVLQPF SFGPRNCIGRNLAYMEIRIIMARMLWTFDLELCEESKGWERQKVWIIWEKKP  
LVVRLREVVRA\*

>CYP6001J2|122110|Acastr1

MFGHTKALFFSGQE QEDTSNYGDDSFTEAKVKQSGLLNDLRALGPNIGQDAL TLLEKVASKGEPY  
DDRTFLMERIIALTASLPQSSKMRAKLSQTLVGTLWDSLQHPPLSYYGDLHQYRTADGSYNNIMFP  
DFGKAGMPYAKSVRSVKALHGSKPDPGLLFDLLMRRRDGKFAKNPAGINSMLFYHATIIHDI FRT  
NRRDSNISDTSSYLDLSPLYGKDQEAQNTVRTFKDGKLPD TFAEERLIGQPPGVCVMLVMYSRFH  
NYVAENLAAINENNRFTEPRKGD PDYDIKVQKRDNDLFQTARLVVGGMYINISLHDYIRGITNIHH  
SNSTWTLDP RVEVTASEGGPAVERGVGNMVSAEFNLLYRFHSSISQRDDKWTADFFKSIFGDKEPEK  
IGLEEFYQGVAKYERGIPKEPSERVFGGLTRDPKTGKFNDGDLVQILKESIEDPAGIFPNIYEPQTASL  
NEFRQFFGLKRHDTFQ SINPDPEIADLLRKL YDSPDMVELYPGLFVEDGKPRMDPGSGFAAPYTVGR  
AVLSDAVTLVRGDRFYTLDYTSATMTTWGMAEVQQNYETLGGSM LYRLIHRSF PKWFKFNSIYVM  
QPMYLP SMNQEI AKQFGTIDQYCLDPPAQPPKV TILSSHAAISSLLNDQKNFKVKYGLQLPDLVFP  
YMLQGDGAANRDNHKFVAQRMLNGQGGLDLYARSFEGAMRKVLAREAYKLGDCYQVDLSKDV  
ARPVTVQTHADFLNLSLRVKGKDDEGLSEEELYKYTVSYLNYANIDSDPAESWNLR RKARQSYMK  
LKTSTEDMVKKSAPKGS LVGHFFPAAPAATGSLREVGQNLTRD LLDAGYSVEKTATTLFTTAAGGI  
ANIPTTFVQILDWFLQEENAQHWA AAVQKLA AKDTPASFETLKKYVLEACRFSSGLALVRICIPEQGE  
TASVKNDQGESIMLKKGEVVL CNVTA AFRDPAVYPDPNEVKLDRPMDLYQMWSMGP HGCAGRA  
IAITALTSMTKVCAQIRNLRRAPGAQGYIKSVPRPLGGRNYLSDDWSRYQPFAGVMVSLRTLNTAT  
KATLLLLSLTGFWTTWGIGKRTGFLAL IADRLKANVKLLPA AEKPLKTTFTGIPPVDQLLRRLTVFL  
WPAIDGTWPGLSLVAFEFSGQFSGSWMVAGLEGLRVGNRRNLSFTTIVGVLSQVITYATILPLYLFI  
HLLTSPTNLDPEQKSPGDPTTDL LVPSEAAAWTIGFTLSYLIPTILVALPSPTYTSFQTHQTFMAFWE  
LYPIPFKIFQILLVRWFSSNLLFDKGS KSPKERKASALRALRYVYLFSAAVGVITHIVTLT LSFSSIFFPTL  
FNPGIRAGLNPSAIFLGVSPLSTTPVKDMGEGLWHFLVWNMNVSGLAPIIWAALQYRNAHEGRAN  
FDGWGV LILKIVAGTMVGSASSVTALMWARDVMVLGQTERS KKL\*

>CYP5189D1|122254|Acastr1

MATMSDIWVGLPWSVQLIATCFVLTATLLITTRLNSLSHSWSAAAGKGHEPPIAPYWLPGIQHLAA  
FLLNPARTFRTTQSKYKDSPYTLLMGNVKFHVFCGSPSAATHVFARSRTFAYEPVTMSMLENGLDLP  
VADR VYFQISLDRANSAEHAKGFVLQNHNVWLRYLSGEPLDDLMQLFTRHFHQVLEQHLD MKTR  
GWQTVDL YQFLRKVIFNTSVLTFFGPHLAQIWGPTMWKDFCLFN DATYIGVRTNLAYVLQPRAGR

ARERMLRAFEQWLTHDSEGDWPKDKYWNEAWGAKMNWERDHLARQFGLSLRGRATMQASF  
LFAIVLNAAPMGSWFTWVAASNSDRLAKCRAESSKFLRPSKSSRFDHELDIDATQLRGSNFMQAL  
WKEALRIGTAASPARVVMEDTELEGYVVRKGSVILMPTALLHHSDFPRADQVDTERWTGEGAIV  
QQRKSIRTFGGGMGMCGRHAAEQEVIGLVSKLITLFDIEFEDSWKDKFHFDPRLGIMHPAGPPM  
VRLKRRVL\*

>CYP65EP1|122262|Acastr1

MLSSNRTQYALALWLTPLVLYVLCAWLKVITGAFFGPLSKIPGPKLWAISRLPRMYMEWQGEEAA  
GVAALHKKYGPVRLAPNEVSFAGGAQAWKDIYGYRKNVGQEKHPYRSPASYWTPANGAPSMI  
QAIREDHQRRLKSLAVSFSEKSMKQMEPRVKGWARLLQTKLAERGDAAVDMVELFRCATFDAM  
GDLALGDDLQMLRNGRLSDYVHAAFSGIRTIIRLRLVSTYNSFTRWLVDQDCFFQSAFVRKAAMENL  
RYSADRVDRLQEPVRDPPDLWTKPLTGIDGKMSLDEYHSTAQLLMTAGTDTSAIGLSGTLYYLLA  
NPDCLAKVTDEVRSASFSSMDDVTYETLAQQKYLDAALQEGRLRYPPVPTGAPRVTPMPGWSICGY  
WIPGGVNVHAPHYATSRLPAHFTAPESFHPERWLGDEKFQNDRLDAVQPFHGPQNCLGQAFAM  
NEMRLFMAAVLLQFDLQLCEDPQAWLDQRVFSMWETKPLMCVATKTS\*

>CYP698C1|122720|Acastr1

MRVNLSIMAMKRPYKGYAFQIPTLSRWEIFICDEAMITEYRNLDNLMSANAVTAELFEAKYALPG  
AAEGIHKIQIPILAKGITWLRMRASKSDYYFSDFYDEFLLAAFAEEVPVKDESWTTVPCFQAATRMV  
SRLTAKALLGRPLCRDPDLIALFCNYGNAVPTS AFFIAKFPAPLKPLVALLCSAPKMSRRIQRIVLQIA  
TQRRANRPKTPNDLTDWMMNWVDQNGSSKYNDKDV ALQIANIVFGAIHTTSQLLVHSLYEVA TR  
PEYRTPLSQEVIECVAEHGGWTKDALEAMRKLD SFIRE SQRWNP LDAGSMARRVCKDFTFSTGLHI  
PAGNWIFAANS PALRDPENYSNPEKFDGFRYSRLREQEGQSANHTLVTTSLKNYDPGRYMAADEI  
KLMLAHMIVNYDIAMEDHGRPPNLI L GKILFPNLNAKIMLRKIRV\*

>CYP5388B1|122727|Acastr1

MEPVFVFSFVA AIALYL VSLFLIPGKKQPRPSEIPYFDWEGGSTTKSNERFFADARGILKEAYQKFGN  
NVYKLKTPNGDHVFLSSAAEALKSMSKKA FN IQEASNEFLAAKYLTIDRPPPEWSHDAVRMDLTQS  
LDWTALAVHPKMIRIIALLTGRVFVGPQLNRNEEWIETTINFTTDVFNGSQMIKKWHPALRPIAQYF  
IPEIQRIHAHHAKIHQLLLPTLKARAEAEAKPGYKPDMLQWLKDRAAKNNVRDFKVQASTQLV  
ISLAAIHTTAMAATHAVYDLAAYPKYIEPLREEVVRVLQEEDGIFTKRATSKMEKMDSFLKESQRLN  
PFSMTNFVRKVVKPISLPNGTPLPVGTIFSVPSVLDREEGIWSNPDEFDGFYRYILRRSSAEESMKHL  
LSECSADSMSFGYGAHTCSGRFFASDTLKLILGHLVKNFDELELKDKKKDRPANMESAFNILPDPTVE  
IMFKRIG\*

>CYP59AA1|122808|Acastr1

MEPLD TLQIALAVVTGLVTVFVIKLYRVR SFIQQHQKQGLPMPPHHWLLGHIPLIVSTIRSMPPSA  
HGLYVGDQIRQQYPHLDSAFYLDTWPFATPILVVLKPDMMYQLTQANQIPKDKGLRRFLEPLTGKE  
DLVTLEGS AWKRWRAIFNPGFSNNHITS LIPGMIEEVEVFKIILNEHARNGDILYLEAATLNLTIDIIG  
RIVMDHRFQSQTRYNDMTAALRKQLEWCTTG MNIDPLEYVNIFRPFVHAYNKH RMNRYLSRELDS  
RYSIIHGKADNKNKSSSSSIFAGHD TTSAGAI FTYHLLAQHPDILSKVRAEHDTVFGSNAADTASVL  
CSKPQLLNRLPYTLAVVKETLRMYPTVAALRDGQPDSTCLATTASAFRRITPEEYLPQRWLVPEDGP  
LYPPKNAWRPFERGRNCIGQEVALTEIKVMLVLTVRHDDL NNGVAPTRKPHLGRFGAEYHSCAT  
QNITTPWRAPCALASGPATFRYVFVFAFLFPTPFIVNYAIIWVMFRH THLMEKVGKIPPTLPHLVPLL  
GSTISFVWDGANLVNFKEHLTPPVLEALYGQALLSANPTFVRDIWAYDAGVQDLARRLPRFWVPA  
AYRLRDKVLASVKRWHALARSSIHASMIYADGDGEPYWGSELDATLLSRLRNSWRGTVEQTPGLG  
LDMKMVEKDPLLILFYAETLRQLLAIHITRCAPDHDIKVNNWLLPRNKVM\*

>CYP5077C4|123121|Acastr1

MSLPDHAPGTPVYDQKLMLLISLAALSLCLVTLGR TYARLVHVP GPLLAAFSNIPRFLWVWTGRAH  
EIHIALHARYGHLVRLGPNMVSVGDPAEISQIYGIGSNFVKVMNPKRLSEFY PVLPYSGKGLMPGL  
FNTTDELHRVMKRPVAGIYSMSNLVYFEPYVDSTMKVFFQELDKQLVRTGNVCDLGTWLQWFA  
FDVMGEITFSRRLGFLERAEDVDGIMGSIWKKFGYSALVGQMTWLDVLWEKNPIRERLWPSTTSPV  
VAFAVARANERLTLSASSEQEKS NLNSRDFLSRFIDAKSQDSKIPDWFLTAWTTSNVLAGSDTTAILL  
RAILYFLLKHPETLHRLQLELEEAANGRLSNPVTWKESRSLPYLDACVKEAGRLHPAVGLPLERV

VPAKGAEICGKRFEAGTIVGINAWVVHRDKDAFGEDAAAWRPERWLCAEQHRHQMERALLTFG  
AGHRTCIGKNISYLEIYKLIPTILQTYEASRPRQ\*

>CYP573A26|123219|Acastr1

MASLDSSSLSSLLSKVTLVYLLIGGLVYLTACVLVYQIIHYRFFHPLSQFPGPFWASVTRLWIAYHSACK  
DEIAVMEALHQKYGPAVRVSPSLIIVNDPKRLPDIYHRQANKSNFYINGLFGKTENVFNMRDWKQ  
HAHFRKFIAGPFWITENLEVREIVNLDAIYIGWQYSFTHVKKMEPLVDTRVYDWLDKIDERFAKTG  
KPIEFSRWAVDFQSFMAYDVISEIAFGAPFGFVETGTDVGSLIQGFHDGLPFFAIMGRLLHPFTTWIKE  
TWVGENFFMAKPEHQSGMGALMRFRDKLLAQRLKDIEAGTAGGRVDLLQNFLEARQEDGKPLD  
MEYIKAEISLILTAGADTTGTTFQAIVHYLMLDPAAYSVMMAEIDEATRAGHLSAMPQFNEVLRHC  
PYYVACVKETLRLCPPAEGMLPRTVSKGGIMLEGKFAPEGTEISCVPRIVQRNRELFQKANDFRPE  
RWLESEENANESKYSMAFGYGARGCLGKDIALMELYKAPVQASSSTSLMQYRRVPSFITFVLMSG  
LVPSHLPPPTCGREEARQSCEFRWFSLLEGCLAADRKAYPGRLERHVKNQTVGY\*

>CYP532U1|123221|Acastr1

MHEKYGDVVRYGPNLVSFANPQAINDIYGIGKPLSKSPYYLPSQAMSKGRAFASLFTLLENKAHSD  
LKRTLATAFSGSSIVSLEPLVDPVIYAWVEQTKKVYVEGNRVCDIGWWMQLFAFDVVTNLTYSKTH  
GMVEQHKDVGIVAWLGMWFSYTSVVGQMPILDQFLNKNPIQRFEWAEISVPTFPTVIFAKKRIV  
ERLSTDPVSLPTKQGMRPDILTQLMESGKKHPNVLTMKMITSQAVSIAFAGSDNTAVTLTAIIYYLL  
KNRRCYERLMAELDDAAANGRIANPGEILAWEQSQGLTYFNAVVKESQRLYPSVGGLLERMTPP  
QGAVILGKWYPGNTLVGCNAWVIHQKERKEVFGDDCAEFKPERWIEGDPDHKMMNQSFFAFG  
AGTRACIGRSISLLEIGKAVPVWLRLFDIKLVDPEKEWTVHNSFVVKQHGVDNATFSMRKYSEKETLT  
MS\*

>CYP680C2|123308|Acastr1

MPISVVALAVQYKWQLVAAVILAYCATLCVYRFFHPLAKIPGPFLPAVTTLYQSAYNKQFYKQVE  
RLHERYGPVVRIPTDEIHLSDPENYDKIYYQASKYGKSPNFYNALCVPASTFGSLPNTVHRIRRGAIN  
PMFSRKMVQQLESVVQDKAGKVCKLMQEGIRKRLPVDLHHAFAVSMVISDFAFNQSYNFLERE  
DLGAYFFRMARGIGPALWVFQQLPSFQAAALKIPPWLAPYLSEPLGAVTSLQQRVCVHVEDVKRD  
MAVGKDSERPTIFSTLLTDTDKPDGYRVPSTMELKDDAYSILAAASDTTGNAMTVATYHVLNPNQI  
YQTLVQELKNAFPDPNAELPYAELEKLPYLTGVIKEALRLSFGVIGRLPRVVPESGATFNGYYVPSGT  
IVGMSSWIMHRNPNIFFPDMKFQPERWLDPENYKRLDRYMVPFGRGNRMCMVGMPLAYCELYVVL  
GTFSSRRFHDLVYETTPADMEYDDFFSSFHVNGNKVFKAASSMIACG\*

>CYP6001A24|123335|Acastr1

MSESDAVMGSLPNRIEGAFTGIKELIHAALQPLPTQTGDGSYIEEKVPTHLFDKDLHDMGFDGIDALI  
DTLKADVSGDPTDDRTYLMENLASRLQPTSKRGTNLTNTFVNKLWKDLLHPPVTSLGEQYRYRQA  
DGSHNNIMFPRLGAANTPYARTVRPQTLQPANLPEPEVLFDSDIMVRKKFEEHPNKiSSVLFYLAIII  
HDLFRTDHNDNFNSMTSSYLDLAPLYGSNQDEQNMMRTGQDGKIKADCFSEKRLLGFPFGVGL  
LIMFNRFHNHVVEELARINESGRFTKPKEGLPASAAKNAVDPYAKYDNDLFTQGRITCGLYINCIL  
RDYVRTILNLNRTSSTWDLDPVQQGKNIFVEGAPEGVGNQVSAEFNLVYRWHAASQRDDEWTQ  
QAYRNMFPKGKPEVSLPELMAGLKKWEKSIPADPQERPFADLERKNGSLNDDGLVKIITESVDDV  
AGAFGANKVPEVLRAVEILGIKQARSWNLATLNEFRGYFNLLKHEKFTDINPDPQVAEQLKHLVD  
HPDFVELYPGLVVEEAKRPEKPGSGLCPSYTVSRAVLSDAVALVRGDRFYTLDTYTPKNLTNWGYNE  
VNYNVGVDQGHVFYKFLRAFPKHFKPNSIYAHFPLVIPPENEEKILKQLGIADRYSWDKPSIPPLTF  
ITSYAAAKSILDNQIDFKVTWGEAIKFLMNHNKGKPYGADFMLAGDNEVNTNSRQMMKTALYREK  
WHQEVKLFYENITLKLREKSYKLAGVNQVDIVRDVGNLAQAHFCANIFSLPLKTKENPFGIYTESQ  
LYGIMALVFTCIFFDAEPANSFPLRQAARQLTQQLGQLTMANVETVKVTGFLASLAERLHHHTALS  
DYGVMHMRLLDSGLDAKDIVWSHILPTLDKDIDVWSHILPTAGGMVANQAQLFAQTLDDYYLSEE  
GKVHLPDIRKLAEADTPEADERILRYFMEGSRMKATVGLYRDAVTSTTIRDGDRDIHVKPGQRLMI  
TASMDKNAFPEPEKINLDRDMDSYIHYGMGPHICLGYGLSKVAMTAMLKTVARLDNLRRAPGVQ  
GQMKKIPGPGGFTLYMLADQSSYFPFPTTMKVQWDGDLPAK\*

>CYP548A32|123348|Acastr1

MMSFITTERLAVTVLYATALGCLLYVLGVIIYRLTLHPLARYPGPLAKITDWYNVYHAWKGDRHL  
ELWRIHQVYGDVVRFGPNSVSINTRTALRDIYGFKANVKKSDFYSVFPATKAAFSTHTAIDKAVHA

RKRRVLSQAFSDSAMRAMEVHILDNIQAWCGHLGDDQARTRDEVSRPMNGFGGPNPASDSKGW  
SAPKNMGDWTNYLSFDVLGDLFCGKPFVGMEREENRFVLDLIPTAAYFHNVNGQMPIIKKLGLDA  
LLFGQIKKKRERYMAYSKQQMAERAKLINGQRRDFFHHLLTAKDPETGKGFGPQELWGESNVLL  
IAGNDRYSNSQSPILIPGKMPAATLIAPAPGSDTTSTALSSTFFSLTHNPHTLHTLTSHIRRTFPTLASIR  
SGPLLTQSTYLRACLDESLRLSPPVGGLLPREVLPGGIVIDGHHFPAGTVVGVPHYALHHKEEYFPD  
PWAFKPGRWIVTGDGGEEGEGTAESVALAREAFCPFVSGPRGCVGKGMAYLEYLELSVALARVV  
WLFDFRLATGGSGDVGLGEGRPDAEWGRHRTGEYQLFDAFVSMKDGPLVEFRARVD\*

>CYP51199A1|123476|Acastr1

MLVSFAAFITLIMLLEEHTLRGLWVGATTMPWWALCLVFIFVCCLTRVVTGFTPVRSENEVSSSMV  
ARRVAVLPYWIPYLGHVPFLFSLSSSLRAARDQVKAGVFALRLGPSKHYIIHTPSLTKAIFHSPPDTVI  
KDPILWRVLENMFGARRQSKETYVPLFKALHKSSHEWLLRRTALAKIVDVTARGIERNVAQLITRA  
FSPIDAQPWERAAPVTLVRDSKVTAAEVSLFTLIRAFVGHATPSIFGNSLIEQEGLFEDIWTLDSGFRF  
LVMGLPRWLPIRSLRAYAARDRLKLHLTRYSLALDQYARGDEPSGEWGDMSDVGELIQSRMKVM  
REAGISQSRASFDLAYLWAMNANANNLVFWIILRICATPGLLERVRAEIAPIYAIVVTSPQGRFLEP  
KSLRLDAEGISRSCPLLKACYLEALRLHSASVTIKRVQKDVVVTESATDNPDGQARSYVLDPGSYVEI  
CHQLHQSDSRYFERPEQFLPERFLISGKDGLKVKDHTLTPYGGGSSICPGRLYAATETVIFAAAILTC  
WDIEPLGSKGWQIPANEAVTGVSRAKDIRVTMSNGRRI\*

>CYP6456D1|124313|Acastr1

MEERSYTATLVLLVAFAAVCYLLDYFYAPKNAPNEPPVLPHPYVGHIIGLLRHGLTYFEATSARSK  
SPIHTLHVLNSKIYVVTSPDLVNAVSRNSSIAFNPFARLAQRLTGADATMAIVGDNLNKEKGHW  
GLVLQTHDDTIAAMAPGESLDHNMRTMLQQATEHLQALEQDADGTVINLYAWIKHVLTVCSTR  
AVYGPTNPFTLEPGLEEVEWDFDRETDLLLNIFFPSIMAPKGYRAREKLVHAFKHVFDNNPRGRSS  
GLTNARYNANTKYGVTSVNMGRLEAGALIGILVNTVPSLFYMLVHIYSDEALLHALRDELQACVST  
DLGKTTTSPPTRHLNVS AVKENCPLFHSTFHEVLRRLHSLGATSRLVLKDTLLNDTYLLKAGSVVQM  
PTSVIHS DPTVWGPTPKSFNPHRFLKQDPAGKEPKRTPAAAFRPWGGGSTLCPGRHFASTEIMSLA  
AMLVLRFDMMVPLQGRWVPPPYQYGYGGDMVPLQGRWVPPPYQVSMATAVFPPKTDISVRVVR  
RREVGDGAWDFVIG\*

>CYP504A49|124467|Acastr1

MGYQSVGIAVVAVLFFAIRYLNRTDVPKIKNLPEVPGVPIFGNLLQLGNEHARKAGEWAKTYGPVF  
QVRMGNKRIIFANTFDSVKHLWINNQSALISRPTLHTFHTTVSSSQYTIGTSPWDESKLRRKAAA  
TALNRPAVQSYMPIIDLESNISIKELLADSKDGQIDIDPNPYFQRFALNTSLTNYGIRIDGSIDNELLK  
EVVHVERVVSNLRRRENGERGQAVYNWEHPKRPRPGEAKLSEAEIKSICLTMVSAGLDTVPGNLI  
MGIAYLSSPHGQEVQKRAYEEIMKVYPNGDAWEKCLTEEKVPYVTALVKELLRFWTVIPICLPRVSI  
KDIQYKNATIPAGSTFYMNAAADYDATHFKDPNSFLPERYLDNAEGTGTPHYGYGAGSRMCVG  
SHLANRELYTAFVRLISAFHILPPKDKRDEPILDALECNAIKTSLTTEPKKFKVGFRARDPETLREWIR  
GSDERTRDL\*

>CYP534P1|124707|Acastr1

MWKRLYAPFKKLGTDTFLT VSPGGNMLWCAEPNVISQITTRRNDFPKPIEYGSNLNYGKNVISTEG  
AAQCMVQSWLGPDGAGDKTVDRVSDDTMRLSLHIISRAGFGVRLLWPGVEDRNMNDTEAEPTG  
GGEQSSSDIPPGHMTMYTDALSSFLHNILLVLLVPRWILITLPYKKTQKAYESYLEWGKYMREIYAAK  
KAEVLAGEERE GMDLMGALVKGAGITPETLAASGPFEKSQPAPKQTFTDEDVLGNAFVFIVAGHET  
TANSIHFSLLYLAMNPASQRRRLQKDLDNFNGRPISEWDYDRDLPHLFGGMAGAVLNEQLRLVPP  
VVSIPKKVSETSPQTFSDGKKAHLPA GTGISLLAVAVHRNP KYWPHGPPSDPSHPAHPESLNDNL  
EEFKPERWLLDSSPTTTTNPPTSNNKNSNGHANGHHLDKAEADDLGVNTAADTAADLFHPAR  
ARRLHPLQRRRLPRLSGPPLRAGRGPGRPHLHPLQRRAGRFRHGRRGKRDG\*

>CYP5078J1|124755|Acastr1

MTNFVHWLQNL PWKPLLWLLSLALLNLLYKRYWTSRRVPGPFLASFNLWKFNAAWHQDMPR  
RNAAVHEKYGPVVRIGHNTVSVSDPSALSIIYSFQAWDKSAFYPIVEALYK GKVPNIFNGKLECDSS  
TDLDAWTRFTTRNTDYHQRLKRASAHAYSMTSLKDLETYLDKCIQLFLTRIAEVTETGKPLDTSM  
WLQYFAFDALGEVNFSSQQLGFLKTGTDVASNIAAIDGLLQYLSLIGQMAWLHKFLLGNPLMHRLI

PQLESSNEIQNFALKMIKQRQEHPTDAHRDILARFLEVHDKDPSKFTFTEILGLTTTNLIAGSGTTSV  
ALRAILYYLCRNPAYAKLRREVLDAAEAGGRISKPVSYAESLQLEYLSAVINETLRVHPSTGFILERIV  
PRGGATISGVYLPETTTVGVTWVLLHHNKDIFGNDADVYRPERWIDSSPEQLREMKRYMIAFGVG  
PRACIGKNIAMMEMCKLIPELIRAYDWELAHPEREWKVLGHWFTKQTDLDMVFVKRGPKEA\*

>CYP65FP1|124783|Acastr1

METVGDLYALDKQRPSDWFSISAATLATLFFVRYIGSVIYEAFLSPLSVYPGPFWCRISNLPAAWQL  
WHGTHAYWINRLHKKYGEVVRITPTELSYSAQAWKDIYGHAAHHGKTNGKEPRFYGPVKDLDN  
KTPGILESDDANHTRMRKIFSHAFSHKAIQEQEPIFQKYTSSLIKLLKMAIAEDSERQFDILAWYNYT  
TFDVMADLTFGESLNLLETNTYAPWISAIENSLQAGVIFRSMRYWPPFYRILRFIFGKTLREKRRVQF  
KYCADSVDRRLEKDPEHTHPDLWSLVLRQKEEERLTLAEMHTNSSAFMMAGTETTATLCAGLTY  
LLKHPEKMDKLVKEIRTSFNTEDEMTITRMQRLEYLQACLDETLRVYPPSVTGFQRRTPPEGNEICG  
RFVPGETTVYVSNYACFRNENNFRDPDEFIPERFLATGGYTTDNRSALQPFSGPRNCMGRHMAYV  
EMRMIMVKMLWNFDYILCDKNDNWLDQKVYLVWKKEPLMVQLKPRKDVKELL\*

>CYP65FM1|124788|Acastr1

MSTVDVPAKGILLGLGPSLTAILAIALFIYVSIIIYDVFFGSMSSQFPFPFWHKISGLPLAYIQALGGEAE  
ALPALHEKYGPVQIAPKELSVVSGAQAWNDIYGFKKPGQPKPKDPVLYMTNVIEAESINLASDA  
NHSRQRRVLAHAFSDAALREQQPLLKSWAEKMKAKMEERVQVGGKAKVDMVKLYHYTTTFDIMG  
DLTFGEGLDMLLEEGQYAPWVQTLIQGIKLDAWMRIAKHFTIGHFLIKTLLNTKIARAKHWEHFN  
AKERVDKRLARTPKRPFWSRILAKGEGHGGMSMGEHYVTASLFMIAGTETTATALCGVTYLLTQ  
HTEAMKRVKEEVRSNIFSFEEDMTLEKLAGLKYTNACLQEAMRMYPPLPCSLLRRTPEGTTVCGQ  
WIPGDVSVGVHVFATHISPLNFKNPRAFHPERWLGDPEYADDFHGAMEAFSVGPRNCLGKNLAW  
HEARLLLATLLHFDVALAEESQGWIHQRLYTLWEKPLMVNLTPAVKA\*

>CYP617G20|124868|Acastr1

MNSPVKTFALTSTLGSIFLIRQVPRYAIANSYIGTASVFFLVQFLVFAIWQVILYPRFFSPLRHLPPKPF  
ASFINGQMPVIAAEPTGAPMQRWVNEIPNEGFINGQMPVIAAEPTGAPMQRWVNEIPNEGLIRYT  
HLFNADRLLITSPKALGEVLVQKNYDFVKPAMVRNGLGRLLGIGVLLAEEGEEHKQQRKNLMPAFA  
YRHIKDLPIFWSKARELVQAIASSVQETAPVSEGEKSSSSLVTEVGEWLGCATLDTIGVAGMGQDF  
NSIQNPNTLNLTyrkvfkpsrqAQILGFLGLFFPIWLIRSLPIKRNEDIMDAAKLIRKTCRQLIDDKR  
EKLNRNTEKEADIDIISVALES GGFSNDNLVDQMMTFVAAGHETTATASMWMIHLLCKHKDVQTRL  
RNEIRNNLPTIDDP TTTVTADMLDRLPYLHAVCNEVLRIYPPVPLTLRIAAKDSIVGQFVPGGTTIIL  
APWAINMSKDLWGPDATDFNPDRWMGPGRANTGGAASNYSFMTFLHGPRSCIGMSFAKA EFAC  
LMAGMVGKFEMELVSDKPVEIQAGVTAKPKGGVNVRLRVLEGW

>CYP527X1|125258|Acastr1

MALFSLPSSSRGLPCVETEETPGSRSVTGSVARIGPNELLTSSPELLIRMNAARSPYTKSDWYKGVRIQP  
GRENVFSGRDEKHHNLRRSQMAAGYSGKENPSLEKSIDTQISNLIQLIRTKYISTNSSLRPLDLARKV  
QYFTLDTITDIAFGQAFGDLVRDEDVYHYIQSTEETLEVLMFLSVFPKLQDLSNEWIAKLCFSPDKD  
STGIGRLIAIAKKLV AERFGPEAITYPDMLDSFIRHGLKEEELVTESLLQILAGFDTSATVIRATMLFLM  
THPVTYRTLQNEIDAAINAGKVSSPVIETGQAQKLPYLQAVIREGMRIWPAVTGLLSKVTPPEGDTV  
ELDGKMVFLPGNTKIGYCAWGVHRNKDVFGE DAHVFRPERWLVEQSEERLGRMQRTAELIWGYG  
KYQCLGKNVAMIELNKLFRNFDLSLVDPTTPWQSENIGLWKQSQLWVRVTERSRTS\*

>CYP671L1|125397|Acastr1

MADASMLSLEGMQNVLGANLPSTVTAALCLGALFHLSIRKVEVDYLIWHYLALSIGVYSALVYAYL  
SLTNCSLLEASAKALLVGVSFNTGLTSLIGIYRLFFHRLRKFPFPFGAKLSRFYTVKLAASKVQYNLEV  
AKMHEKYGDFIRTGGAHPMSFEVPSFLLSQFFRQVHESSAFQVSKDHKKCSIHMTRDFEDHRRRRR  
AWDRSFSIKSGSGSVKSLATYEPRIKSKVDLFLSQLGAPGRTSVNITDWAMFLSFDVMGEVGFSGDF  
NNLATGKEHPAIGIHDHMLILGILSNWTWPDQNPQDIVSWLMKAYKEKDMSAAPSQAALDEDA  
RVVIIAGSETTSTTLATALYLLAKHPATYKTLQDLVDRALPGGERDWSYERVREISFLDGIINETMRL  
KPPLMTGYRYRTPPHGIQVDEVHIPGDVNVFVPVQVIQRDPYWPKPLEFIPERWSDQKQQLSIEN  
APFIPFSLGVYSCPGKNLALMTVRSALARIAQQYDVAFAPGETGEDFDLKAQDTFTTTLAPLQLQFT  
PRYRG\*



>CYP682BE1|125569|Acastr1

MPLQYLTRLVAIPLGTVFIYLAGLAIYRLYFSPIAKFPGPKLAALSRWYEFYFVVLKGQFTFHIQEL  
HKKYGMCIPFRAVNARRLIIAAGPIVRITPDELHVEDSDYWDELYSRTARYDKYEWMAGRFGNSTS  
TFTTAKHDLHALRRGALNPFFSNKPSTIREKVELLCKNIAKCKSTGKEFRLEIAFSAFAGDVVTQYAL  
GMCYNHLNSPGFTESFHEAFMAVSEFGHVALQFPWVHPFLNALPDAISEMMNPPLHMLLVLQRD  
LKIKLAQIMKGELKTDKQHPISFQEILQSDLPPQEQSVQRLGDEAQLILGAGLETTGWALSTAAFHII  
NDPAIFKKLRDELKQAMPDPTAQLDWLQLERLPYLSGCIQEGIRLSYGVSAARNPRISPSKPTKYKDW  
VIPAGTPVSMITVDVHHDEEIYPKSRSFIPERWLDNPRTANGSPLNRYFVAFGKGARSCLGINLAYA  
ELYLALAAVFRFSFELYDTDISDIELAHDCFLPSPKFDSKGVVRVTVKSIED\*

>CYP682P2|125690|Acastr1

MAWLQSWLSFLLRSFTFHNGPLAWVGLAIGYALVLAIRLYFSPLSKFPGPRVASLTWGYQFYHDIV  
RRGQYIWWVQSMHAKYGPIVRINPSELHVCDSFYDTLYAAGGPQRKREKWAWDNVGAAGVEDS  
KWAWDNVGAAGVEDSTLSTIDHDRHRMRRSAIAPFFSTQNVRLQPVIAKVNLTFRRLRDLKAT  
GNPVNLSHAFSALTNGKIDVIMEYCFARSSSRLEAPDFDPTYKNASHRGVMAQIAKHVRPLTWIA  
KALLYLPESWAEKLGPAFRMFLVERRVSALIQSTMVPRFCPCFAHVTVFRELLDSKLPSEQEKEPSRLA  
ADAQVLVSAGSETTARALTFATYSLTSPVVLQTLKLEESAIPGSDPAKITLEQIQHLPYLSAVIKE  
SLRLAYGVVGRRLARIWPREEIQFGEWSIPAGTPVSMTSYDVHHDEEIFKDSFRFNPQRWIDNPGLDR  
YLVSFSGKGTQCLGMNLAYAEMYTLARLFRWFGCGGVRKSDDVGVLELFDTDDETGVRSDDVG  
VLELFDTDDETDMKMAEVLVFPVKRGSKGVRAVILP\*

>CYP5148B20|125970|Acastr1

MSLRRRAGRLKRVPPPAAPRDAKLADSNDDDDSGDDDNVEVYMLAESQRFYSYRKECPPFVRT  
MARRNGLREDRKAVVLADDDGCRPDESDCQRSELVSHVYAPKAGFWTLELGGVRMIVKAKAHG  
NGAAYVIWWGPEEGFGEKAVAFSPRAPRGEVRGWSGDGETEQPDHDSHHEPSDEENEFERSVDATQ  
PSSMRNNSRNAKDKGQAKIKRLIAGLTGTDRGLTTKRPSQQLRVLLEQHGQAEPVTNKAARANR  
PSLPTPRRRLLPSPSTSDIPLAQVRMKRERSVSEGAARQPPKLPVQTSSHNPPLPSKNDNGSVPFYL  
HSCMTIETLFASALSVWRLRGKDEDVAALTVRFDWLKKAEMIIMREVADSFQKMLETIAEAPVW  
LKTDETRKSCDVRVGSYNSYVTLQDLVASGLVAPLVTLGVIATTGLVMLYNQLFGRVLVDKHGNGKI  
PDGPWGFPIVGSFPFLRRYPELALDHWAKKYGDLYSMWLGNGQLFVIVSDPGIAKDLMTNGAVFS  
SRKELYIKSQTVFVGRGITATPYNDRWRRHRRIAVGWLNRVVDSTYSILDREATVLVMAHNSK  
GGTPVPNPQSHVGRCSLNNMTTITFGLRTDSIHPLVGRALKLSREFMNCCTGPMNSNLVDFVPVLQL  
FPNMRMRIRGRKLHEALLETYGGLIKEIELEFKSGRDVDDCLVKSMQLQARKEENLDDLDMLASAF  
MIGGVETTAAIMQWFSALIPAHDPDIQKKAQDELDRVVGDRDLPTIEDEKDLPYCHAIKVEVERCHN  
PFWLGTPHVATEDFTYKGNFIPKDTVVVLNTWTMHHDPKHYQDPDTFNPDRYINDHLTSAESAN  
LANPHARDHWMFGAGRRICPGMIVSEREIWLTVSRMLWAFNMMELPDEPIDLKEYDGLSGRSPVP  
FRIMVSPRHAGVERVWKGEAGVGDC\*

>CYP5089B1|126315|Acastr1

MPSLFTAVQCAFLAVLARCIIYRRYFHPLSRYPGPFLASFTNIWKFYAFFRGDHHLIEQNLHDKYGHV  
IRTGPDSLAFSSLSAFEAIYGFNRSIEKGFYDFGRDANTQAGSIFSARTDAAHREHRRKVVGALLT  
SKVAAYEPIISKNTSIFLSRLTDARSLRDTSTVNVAPLIHRYTFDTLLEIVYGEPICPQPYTDTKAAHN  
VLTGFRDLSKLAWGAALLPWFGWLMSTRPMVYLIRRPITYDSEGNLTSIAALAAANTRDVTFAHPEK  
ALQSTQPSCLKAYLQLPPTDPKHMPPAQIFRECFNLTFAGPGSTAAALTATLHELGS DPRGQKWQA  
RIRADLRTTGSSSPTSSPVLVAVLKETMRLHAPFPTAFFPREIRPRAESAIPHLPAPLPVGTVSANSYVL  
GRSKEIWGADAEWRPERWLGTVAEKGEGRKRLDDKFVVFSGKPRGCVGREIAMLVAKAVAAVL  
GRWEVSATGACKRRNFLEMQYEECWIKFGDLAG\*

>CYP5317A2|126469|Acastr1

MDTLFNSTVTGASVEVTSNLVNGARDLSFVYASAVVALTALLSGFEAGRKILNRILWFFDGILGGA  
PHTVSLPGPPGLPIVGNLLELSNGHVPIKAEWTKKYGDVIRVSLGEREAVFINSHGALAKTVVQQGP  
AYQSRPTFKLFHSDFASSGIWTVGTSPFSDRLVRTRKALSSQISPRLLPIYTPVIHPKLLKFLGDILTISE  
GPAVDMAEKLHRFGTGQVSEQLMGIPLDDDMVGMLAENETNIFRQRTIGSPARDYIPILRGAGWL  
RYVAGKMLGIKNWSFDEKEEMAREYRKRQQVYIDKMLDLSMERIKNGDETSPILGNILRQDLLKKE  
EVLLASYTGIAAGVNLGYSLTWIVGYLANRLDLQKNGYEAIREVYNGEPPKPHYDRVEYVKALHT

EGSRIYTPVRLGFPRQTLDGASYNHGKIPKDMVLVIMNLMAGNRDPVAFDRPEEYLPERWLNCRKG  
RTDIPGQGGKLGVTHTLYGCGRRVCPGIDMANRGLYSTLVLLLHFFTWERQPLGEEKKHVFPLF  
RAERECSEMDAIADTATPTEAQAIWWSAGIKFGRPVSSFIIVILKAFAPGLRLRRPELSCRSRHELTG  
VVSDKLFQASLYTPKSISLSEFSFDLFRAGKIQHQN\*

>CYP665A2|126478|Acastr1

MELAGTMSLSVVGLCLPIVLVMAVFSKYFLASCRPRNFPPGPQTIPFVGNISQVPKVKAFRLFHEFRA  
DYGSIIGLKLGSQSVVVLNSYKHVRALFDKRGAIYSSRPNSYIANEVVCPNEIHLILLQYGNWRKQ  
RKIVQSLLNVNAVDNVLPIQNAEATQTMFQLLQDPQGYDHIRRYTTAVILASVYGQRGARFDSNP  
VQALYHAQDQFTAILEQGATPPVDAFPFLKMMPEFMAPWKTRAKAVREEQKSLYLALLRETRERM  
EAGKGPACFLHMLKDEKNDMDDEHIAYLGNLMEAGSDTTASTLLSFLAMIKYPEEFKKAQR  
EVDQVCDTLRSPSTDDISRLPFIRACMDETLRWRPVAAGGIPHMLTQDDTYHGYFLPKGTIFLANT  
WAIHHDETEYDRPEEFIPDRFLNNKFGTRNPVDESTEDHRRVSYGFGAGRRVCPGQRLARNSLMV  
NMAKIAWGFDLSPGLGPVNVNDINTAYS DGFLIAPNKFILFTPRSDKHKDIITKEYEAIKPFPIKYRN\*

>CYP530A44|126571|Acastr1

MVHLGECFESYHISFSTWSLHAPTYHIQDLENKQMLYEMVETPAQFLEHIRRYSNSLTTS MVFGWR  
TVNYDDPKLKQLFDGFGFSTLIQTPTAALLDSFPFLRWLPDFVLPMAQAKKLHKTEKKLYVDH  
WLNCKASIQDGTAKPCFCVDLARQQKEHGFSDQAAYVSGSLLEAGSDTTSSTLYAFVQAMVLPF  
DVQKKAQQEIDRVVGPDRLPMEDEPYVQYIRGCIKESLRWMPTAILGFPHAVIRDDDEYLGYPK  
GAGVLSNVYAIHMDPTRYPEPRRFPDRYKDDFLNLADSAANPDASKRDQFTFGAGRRCQGMHI  
AERSLFLGISRLWGFDFAPVTGADGNLVVPAERLTQGFVAMPEPFQAKITPRSEWKAELIRRVW  
AEAKKDLNVETE QWEGIPDGMALSKF\*

>CYP51F1|126818|Acastr1

MGFLATIAGPIPSFSSSTGVAIALGFTSLIVLTILLNVFKQLLFRYPNEPPVVFHWVPFIGNTIAYGID  
PYKFFFRCKEYKGDVFTFILLGKRVTVFLGKGNFILNGKL RDVNAAEEIYTPLTTPVFGKDVVYDCP  
NSKLMEQKKFVKYGLTSEALRSYVPLIAGEVYKIVDQSPTFKGSTGKFDVPSTMAETTLTASRSLOQ  
KEVRDKFDSFADLYHDLDMGFTPINFLPWAPLPQNRKRDSAQRKLAQTYMDIIRARREGGSEKD  
TEDMIWNLMSCVYKNGSSVPDMEIAHIMIALLMAGQHSSSTS AWIVLRLATRPDIMEELYREQVD  
VLGADLPPLTYDDLQRLPLHAHVVKETLRIHAPIHSILRKVKSPMLVEGTPYTIPTSHVLLAAPGVAS  
RIPDYFPNPLTWEPHRWDAVADHKAEEDEEKIDYGYGLVTKGTNSPYLPFGAGRHRCEGEQFAYV  
QLGTILATLVRQFKFRNPPGVKGVVETDYSSLSRPLGPAVVEWERRGKSG\*

>CYP676A8|126930|Acastr1

MAPALGSLIFPSKLSNLNCTSTQVVSLSLLFIILFALKRRYLTPIRDIPGPILASFSDLWKLWHIPTGHIE  
EATIALHKKHGT FVRIAHNEVSVDPAVAQGNFYAAFAVPDHNYVNQMSEMDPKEHVRKEKN  
VAAGYSLSNIKSEPYVDATIELLVRNLDGLAQAGEKVNLD RWFTYCAFDIIGEVAFSRSGFLREAR  
DVRGAIANSRNLFYISLIGHAYWLHQVLMANPILGWLNLQPTSHIFDTCLAAVDSRKKNDKVRR  
DMMERWLEVRRTYPDRMEDKEVLAAAMVTIGAGSESI STLQAFFYYLLRNPPHLLRLRKDVDA  
HRRGELSRIVSYAETQKLPFLQACIKEAYRFHSAISFNLPRVAGEEGVTIAGRTPKGIVISLNPWVIH  
RDKGIFGDDAEVFNPERWLDPENARVMEKHLIHWGAGYNMCPGRHLAHLAISKIAATLLRDFDIA  
LVDPTQEWGWRSWFLPLPSGWPCYLTRRDLGKISQ\*

>CYP61A1|127065|Acastr1

MAADMANGTFASPVASALYVATLEPNTGGLLSQLYKGLNGWSVTITLLLLLVAYDQFKYVWNKG  
SIAGPSWKIPFMGPFLQSVNPKMDEYKSKWASGDLSCVS VFHKFV VIAASRDMARKVLNSPAYVKP  
CVVDVAQKLLRPTNWWFLDGKAHVEYRKGLNGLFTRQALELYLPGQEEVYSKYFDRFVEVSQEN  
RGKPVPFMPHFRELMCAVSCRTFVGHYMSDKAVKKIANDYYNITAALELVNFPPIIPFTKTWYGKK  
AADMVLDEFKCAAKSKVRMAAGGSVTCIMDGWIKSMQDSERYRRKVAEGVESEKPATLLRNFS  
DFEISQTIFTFLFASQDATSSAATWLFQLMADRPEILAKVREENLAVRNGDRDREFSMDILEKMTYT  
RAVVKETLRYRPPVLMVPYMVKKSFPITDSYTPKGSMMVPTVYPALHDPEVYPDPETFDPPDRWITG  
DAEKAAKNWL VFGTGPHYCLGQTYAQLNLMAMIGKASLHLNWEHHVTPLSEDIKVFIATIFPQDD  
CPLVFSHRN\*

>CYP620E39|127250|Acastr1

MAIALPTTLTVFFGIVALYLISRLLRGQNGRPLPPGPKGIPILGNINDMPKPGTLECHHWLQHKDL  
YGPISSVTVLGQTVIINDPQIAFELMRDRSAIHSSRPSQIFSGEIVGWKNATAMSPYNDTWKIHRKNI  
MKVSTSNVSVSVFDRVQEAESAHFLLNVLDSPSDFDHIRKEAGSVILKITYGYTAEAHGRDPPTAE  
AHGRDPFVGLAGKTMQTFAEATVPGWIVDILPFLRYLPDGCPTGFKDTGRRMASTLRQCVDQP  
YEFVKQQMREKRHKTSFLSQAIENIGSNAEMEFIHKWSALSLLTGADTTVSSLMTFFLAMNVFPEV  
QKKAQEEIDRVIGSGRLPVSADRDNLPHYMAIMKETHRWHPVAPMGLPHTSTAEDVCQGYRVPKG  
AMLMPNTWWFTHDPAVYPEPMTFRPERFLETPTHKPEPDPRQFIFGYGRRICPGRYVADNALFIT  
AQTLAVFNIEKLVENGVLEPEIKFEPGMVSHPIPYRTSIKPRSKAHEDLIKAAEQEYPWEESDAKEL  
GNIKW\*

>CYP527R3|127753|Acastr1

MAKTALSGRMNHELTTVIEKYGSLARIGPNDLLTSDPETIRKMNAARSQYLRSEWYDSMALDPDL  
HNILSEKNMARHDSLRFRMAAGYAGKENPTLEQNIDDQILELVRVIERKYLSTDSVLRTLDFGRISQ  
YFTLDVITNIAYGKAFGYLPKDEDLYNYIETVEAVGPFLNFMVVPALQKFLSMRWIRWLIGPSVKD  
KHGMGKLMAVAQQVVSERYGPDRKDRNDMLGSFVRHGLSQREAESEVLAQIMAGSDTTATALR  
ATLLHIITNPRVYRLLTTEIHTALSQNLISSPIITDAEAKTLPYLQAVIREGLRIWPPVSAWLEKEVPAS  
GDVIEGRFVPGGTIAVAGWAMQRATTVYGADADVFRPERWLEAGRERRRGR\*

>CYP53A61|127786|Acastr1

MFLSFLTPYALLLLPIIFYLLPYIRNWSIRDIPAPFPATFTNLWLLYQCRRGRRYLAVDNAHKKYGPL  
VRIQPDHVSADPEAIIYGHGNGFLKAEYYDAFVSIERGLFNTRDRAEHTRKRKTISHTFSTKSIGQ  
FEQYMHHNLEMLVKQWDGISSTAPKDNNGGYAYIDSLHWFNYLAFDIIIGDLAFALKPYAKYLPDRF  
FRDGLEAVQNLAGIAVARVNDRLQPGVAEKNERNVDLLARLMEGRDENGKNLGRAELTAEALTQL  
IAGSDTTSNTSCALLFWCLKTPGVIPKLQKELDEAIPDKNTVPDFATVKDLPYLHNVINETLRIHSTS  
SLGLPRLVPPGPGITVHKHHFPQNTVLSVPAYTIHHSTAIWGPDADVFRPERWDGVTEEQKNAFIPF  
SYGPRACVGRNVAEMELALIVSTVFRRYEFDLRQDKLETREGFLRKPLACEVGMRRRS\*

>CYP505A69|118843|Acastr1

MHSVAEEVVAERRRHPSDKKDLLNAMIKGRDPKTGEGLTDATIYNNMITFLIAGLLSFLMYLMKT  
PAAYQVAQQEVDKVGKEPVTVEHMSLTPYITACLRETLRLQPTAPAFSTQPVASTTEWPVLLGNE  
KYEIMPGQVIVALLPGVHRDPVVFVGDDAESFRPERMLDEMFEKLPKNAWKPFNGNGVRACIGRPF  
WQEALLTTALLQNFNHLEDPSYQLAIKQTLTIKPKDLFMHATLRGGIDPVQLEKAMFSRGSQEL  
QVSSKDKKIEKMTISGGAKKPMISIFYGSNTGTCEALAQTLANAASGHGYSARVAALDSATDAMPR  
SQPVVIITASYEGEPPDNAAHFIQWLGNLKGSEIEGVQYAVFGCGHHELLDARGGQORVAERGYAD  
AAAGDMFNFDFDQWEDQVLWPSIRKVFGDNDANAEPSGLDVEVTGSVRISSLHQDVREAIVTDK  
ALTAEGEPPKRHIEIKLPTDMTYRAGDYLAILPLNQPPHRRVLQRFELPWDAKITIKPGQNTVLPVG  
EPLSVFGLLGGYVELSQPATLKNVIAISKSTSNEATKQEFQVLCGDSFKSEITEKRVSPDLDERFRDIR  
MPFGDFLVMPLPLRIRQYSSSPLADPTSCTLTYSVLDQEALAGGKRFMGVTSNYLSMLESGERIHV  
VVKPSHQAFHPPLDIANVPLLMVCAGTGLAPFRGFVQERAKQIEAGRQLAPALLFVGCYRHDRDR  
LYPEKFDEWERLGAVDVRYAFSREPEKSNCGKHVQERLWNRKDVVALFDGGARAYIV\*

>CYP5087A3|118963|Acastr1

MHVKWAMTLLIHFLAILTVFTATLSLQKHIRYRAYRLLSITHGYQDPPKEGPYDIFGIFKVLRA  
LNLKNTALADTIALFERYGETYASKVLIQTVFFTCDPNRNIRHVLITRFVDYDSSVVRVHLFRP  
ITEHGIFA  
VDGSDWKLARSLYRNQFANTRLIMDFDMHEEHFQSLLRSIPPTGKPFDLQPLFLNLTLDTTAFALG  
ESVDSLSTQSDKHKHFVHALLYVKKIARNGLGPLHLLLSKRDFYRACSDVHRYVGCIIERTLDEK  
QEEDEKGGQTKDSSRYNLLRGLMENSSNVVELRDGVITVLIAGIDSVASLLSTTFWLLARNERYQK  
LRTSVFDTVQGELPTYDQLKSLTYLRYVFNEAMRVYPPVFNARIANKDTTLPGGGADGTSSILVK  
KGQRVVYSSWATHRSIKSFGDDAHDFRPERWVNMKAELGYIPFNSGPRVCPGQQYALMEASYA  
VVRILQTFPIYKSHDSRGFTEHIGLNLNSNENGVVVELKRG\*

>CYP5236B1|121044|Acastr1

MAIVINLQDGFVYVHSTTAWSQLVSVEKELAPRAWLSYINPKCSQIQMAIVEDLLGAFKPGIALAVL  
LFLLIATLVAHPLLFSSLSHVPGPWCKLSWYIIAYFDVRLQRNDKIAEWHTKYGPVICQKRMLISNF  
YHRTTINKPVVEQPIRERMHQLFNQINQRLQADAHTRTINLYPIFNCFADNISHLLYGPRHCTYTIE

NDCHERQLLLLRMKQAQLWGPLKFNFLVQTSILTKRFLPEGFSESLVAEHNLADWNWRTLMEAI  
EDKDVANDFTLLARMLAVRDKEGKPLDLNYIGSELFDHLNAAQETVAVALAYVAYHLSDDHWDW  
QEMIRKELQALPVQEDGFPPFAAVETAPLLDAFIREVHRVNPGASGRQERYVPDGGKEYDGIMLPE  
GVRASASTIALHHDETVPSPFEFFSPWRWLNLSPDQLQRMERSFIPFGYGARHCLGKALATMELKLL  
IACLCLRYKMEVDRDTMTPKAMWQTGTMDSPYGLRCDLILHPVKLP\*

>CYP5192H1|121236|Acastr1

MTPTLSAMLVLLAGLLINSAHQLLPQTVQATTADERSLLRADKPLSRTSQCRLITHFSATYPSSPRSC  
HIPVFAKIVRSLPPDVHPHCYPHYIRQAYGLGPIFYLDTWPLGDPMLIAGDPEAAHEVTVTHSLPK  
HWSLQAFLAPLGGWENLVSMEGHVWKAWSIFNPGFAPANLMGLVPNIVEEVEVFARVLGEWA  
DRGEVVILEEVATKVTVDVIGKVVLDTKLGDMMCGIDIGGMQFNSQTSNNELVSALRSQVRWSWPA  
DMYAPIRNLNPIRPFVFWWNTRTMDRYLDKELERRFELGSGGEMKKRKYVIDLALQTYINEQSPER  
KGKGFDTFKKMAIDQIKTFIFAGHDTSSSTICWVYHTLHQHPQALAQIRHEHDTIFRTDLSLAPQL  
LKSTPHLLNKLPYTLAVIKEVMRLYPPASSVRSGEKGYSIRNTYPTDTFLVWPALYSLNHDPAFFPSP  
NKFLPERFLVPKPPSSTSTSTSTLTDFPPAAFRPFEGHPRNCIGQDLALLEIKIVLVTLRAFDVRAVY  
EEFYATEGSKERKKIDEVEGEKAYQILWATAKPKAGLPARV

>CYP6677E1|121603|Acastr1

MHKELGDIFMHVSPGDTEVYISNAEAIYEVCSRKRDFPKPLARLEFLNAFGKNVDTVEGHDWQRH  
RRITAPAFNERKNNLVWLESLRQAVDMRDWWVQSGPVGSSNVAADTRTSLHVLSCVGFGTSHD  
FRKSGFSAPTHGHTMTLRESLDVVYSNIFMVILLPHRLLSLPFLPKKLFNVGQAIEEYKRYMVEMIEQ  
EKQLLTQRAPGSNNLISLLVRGSEQVQTALMSDTKTSSDSAEGLTDEVMGNVFIYTLAGHETTASA  
LNVFIYTLAGHETTASALSYCSLLAVYPEWQDWVAAEWQDWVAEELQHVLPQGHRIETWDYET  
LFPRLLKRSALMLETLRLFHPVTAISKYTADQAQQLTINGKPHIIPSKTVVQLNTTAVHTHPRYWGN  
DSLLWRPSRWITSPKTGAAFETVLDAETVLEPTKGSYLPWSEGARICLGRKFAQVEFVAAMAVLLSG  
HRVRIVPKEGESLEEARRRALGLMEERRLDVVVEKDDQESVSAWDPVIMPGEQGHQ\*

>CYP61B1|122715|Acastr1

MSITGLLLLDVVAALLVKSIVLTYPVSHSLFLTASALFLLQVLSRLLWRCVLYPKLYSPLRHLPPPG  
GSFLMGHFWQLVKDTSGGPLRAWVDEVPNDGILYPDLFNAERVAVVKPKALAEVMVTRSNDYV  
KPPHIKKGLGEVFGTGLVFLEGEKHKVQRKRLMPAFTFRHVKDLYPVFWRKSTQLVEALEAYTSDT  
GADASSVVVHVCDWASKATLEIIGAAGLGQDFNTIGDPHNELVKTYQTVCSPSKTAIVVGLLGFTA  
PARILGSFLLRFTDDFLGAAGVVRHCHSLVEAKKQYLRKADQHPSVDILSIAVQAGDISDDDLVN  
HLMFTLLAGHETTASALSWAVYFLCKYPNVQTRLREEIATHLPHVRDAAWSPEAADIDNIPYLHA  
VCSEVLRLTPPVVPRMAEVDTSIVGHFIPKGTVIIIAPWAVNTSKELWGEDAAEFNPERWMGPG  
NANTGGAESGYAFMTFLKGPRGCIGEAFAELACLLAVWVSRFETELADKDCVTVKSGISSKPA  
PLDVRLKTLGACRSRC\*

>CYP530A42|122732|Acastr1

MSVSMTLVIVGVVTLVLAKLSQIGRRPAGLPGPPTLPLIGNLHQMPAKDGHLLQFQKWAEYGPY  
SLILGTKVMIVLSSDQAIKDLLDKRSYSSRPEMYIGQIVSGGLRVLLMEYGTWRMIRKMHVHNILN  
IKAAKSYVPYQDLENKQMLCGFLDCPELFDHIRRYTNSLTQMVFGFRTISINDPKLKQLFEGFEKF  
CEVTSASTAALLDFPVLKRLPDFCLPLRSYAKQLHKKERELYIGHWMNVKKAIEKTAKPCFCVD  
LVKAQDVEGFSDDLAGYISGSLEAGSDTTAATLVGFVQAMVVFVKVQKKAQEEIDRVVGPDRLP  
MEDEMSLQYIRGCVKESMRWMPDILGVPHAVTRDDEYMGYKIPEGAGVMWNVWAIHMDPNR  
HSNPRAFDPSRYAQDSQTASDAASNPDASKRDQFVFGAGRRVCQGMHIAERSLFLGISRMLWAFN  
FEKVKDADAGNEITPDINKLTQGLFVLPEFPFAKITPRSEKHAERIRKEWADCQQLLDGNKQWREVP  
KGMAFSTYDPDLLVKH\*

>CYP578Z1|123776|Acastr1

MLWNRFKGRESTAVHAAHVKYGPVVR LAPNEISINCVDGGTRTVYGGGFERHEWYIHLINNLVSII  
PSKPHSIRKRMVSNISYSYLFSSPLHALSQTIIYDRLLPVIQPVGENRTLDVLELFYAVNMDLMSGY  
LFGLTNGTNFLQDEKTRKHWSIYQRRKTHMFWQPEFPNLTAWLGRIGIRVVPREFDITKEIETWC  
LSMCDATEQFLATESITEWQDPKFEPVVYKQLKHGLANDRSDQPPSHLPPPDQRLTLASEMLDSLIA  
GFETSGITLTYITHALSLRPHLQARLRAELLTSPPLLYPREPHTPAQLPSSKAIDALPLLHAVIMETLR  
VHPPVTIGQPRVTPPSCTTTLGGYTDIPPGRVNAQAYSLHRNAEVFPEPEEWRPERWLEGKIENQG

ERDEKSRWFWAFGSGGRMCVGSNFMHHDHIANMNFSSQVIYLIEAYTTVWTVRLGVKGILYICSGF  
LPLDGELERGTSSVGLQNTKSQLSDDTTREDSPHP\*

>CYP52AZ1|125462|Acastr1

MASSPILQAVFLFPLVYLLQWRFRGYLAERRFQRFARENGCQPPHLSVNKLPWGDRIIEVFRFKGD  
MLDDLIFARYKQEGAWTYTHHTLFGQHILHTVEPRNVQAILATRFKDFENGEIRHHQFGPLLGYGI  
LTSDGPAWEHYRALLKPQFSREQISDLKVAERHVQHLLFQALPVKDDGWTEGGDILELFYRFTLDVI  
TEFLIGRSVNLQLAALGKAADDTQASAEAYFRDEFTVAQETLMWRIRMQSLYWLMDSRAFRACCS  
MCRRFIDQYVAIALDPNRLAAEKNARATDGAKEKYVLLDKLAETTQDPIELRDQLLQLLTAGRDTT  
ATSSGFIFWTLARHPEAWKKVREEVFRIFGAEGQGEEITFAKLKSARYVQYVINETLRLYPVAPLNN  
RFAIRDSVLPVGGGPDGEGPVAVRKGTLVNFSYILHRREDIWGDDVLEWKPERWIDRKHGWEYIP  
FNGGPRICIGQQFALTEISFVIVRMAQRFEKIEPLDPGEKLVKGLRLTLVPRNGVKIRLFKGTKT\*

>CYP6001C38|125721|Acastr1

MAYLTVPAFFASLFVVAFLYIGGTTKMMKRLSSTFKKGRSKEEEPVNGPHHPQKPGQDGAARSPGL  
ERKEAENTHHAVKQEEVQSSFRQYAQLIHAAQRPLPTQSGDGSYLEEDVPSGMMQDLKSLGFQDV  
KTLMAVMKTKATGALADDKTYLMERVIQLVCGLSERSRSRIDLTNSFIDELWNSLQHPPLSYMGDK  
FTYRQADGSFNNPMIPSLGAANTPYARSVLPATLQPGALPDGPMIFDSVYAREEFTPHPNNVSSVLF  
YWASLIHDLFQTDHKDFNLSQTSSYLDLSPLYGDTQEDQDQVRTFKDGKLPDCFSEHRLLGFPFG  
CGVLLIMFNRFHNYVVDQLAVVNEGNRFAPKPEGLSEELARKAWTKYDNDLFQTGRLITCGLYM  
NITLLDYLRITVNLNRSNTTWTLDPRVDMGKVFGKDGTPRGIGNQVSAEFNLVYRWHSATSKRDEI  
WTENAYFEIFGKEAGEVSMQELLSGLGKWEHELSSKDPDRPFAHLKRGADQRYNDDDLVKIMTE  
SIEDTADTNESPWKVHLVPTMSQKPFVLSLRAVEILGMQQARKWNCGSLNEFRKFFGLKPHKTFED  
INSDPYVADQLRHLYEHPDYVEMYPGIVAAEAKVPMVPGVGIAPTFTISRAILSDAVCLVRGDRFYTI  
DYHPKNLTNWGYNEVAYDLNIEQGCVFYKFLFLRAFPNHFKQNSIYAHYPM TIPSENKKILTSLGRE  
SHYSWDRPAPIPRVNLTSYVGAKYILEHANEFHVTWGEGLGWLGMKGGLDFMLAGDSKFHGKQ  
RQLMHQALYRDQWHQKIDFYEYITLKLKEKSCKIAGVNQVDITRDVGNLAHVHFAANVFSPLP  
KTENSPHGIYSEQELYMILAVIFACIFFDLDPAKSFPLRMAAREVSQQLGKLVEANVKMVNMTGWI  
AGIVDGMHQHHTPLTDYGVHMIRRLLESGLGPSEIAWSQVLPPTAGAMVANQAQVVGAAARDPDV  
FPSPNEVRVDRPLESYIHYGEGPHACLGDASRVSITAMMKVVGRLDNLRRAPGPQGQLKKIPRPG  
GFYIYLRWDWGGFWPFPKTMKIQWDGELPTLKKL\*

>CYP511D1|126182|Acastr1

MTIMSKIQTSKGFDLLGYGLLLGILYYVGLVIWRLFFHPLSKFPGPRLAAATQWYEFYHDIILGGVTP  
KRYSAHLHKRYGPILRTTPETLHIGDPEFYIGDPEFYKELYAWNSEYYKAPSLYEAIGVSNSLASMCDP  
KKHKIHRSVVAPLFAKQSIDRLAPSVADKVEDAVEVVKHCHAQGKPVDIQLLYRCITVDIISKSLFG  
DSHNLVGSYDGDKPLDLSIELFSTSLAMMKHFILQKTALNLPILSEKLLPGYASFRTVGHNPVNY  
GPVLVLISFPIKDCAKWISSIAARRERGLLHSEDGTPTIFDLMLESDPKKGYEVPTEELVDDAFVFLF  
AGSDSTAYTLVATFHILEHKDVLTRLQSELKAAPRDTHGTFVWKDLAHQPYLTAVIKESLRLASPV  
AIALPRIVPPAGTYVGGEFIPGGTTVAMSIFTMHNPNPDIFETPEKFIPERWLGEKGKQLDQWNVAFS  
KGDRNCIGQYLSYLEMRICLATFFTRFDLELYETDRSSMEFLEKGS�KNASNVKVLAKPILLVPTTEV  
LLTSRDRESGLYSELTFHEDFLESHVLRRLNGTAAGSGSDGGNVRDNRGKALQFTTLNNGRTIVVKD  
AFVYSNKGFKNLNQAQILNDALYHSDALDSQQWLIYYISRPLIGSFETVNIIPAALPDHSNGAKGPS  
RRNVSETEGGPPAPPRKKDIKSFNDLLNFPMIARQMHPGLARLFKDFHRDFEKSPLAASLRSLKTT  
ASGQEEMLPVIRSNSHDSLRLHGMLNGHAKSPSISGEYNDDDELDTMRRALES AVTAAIDLFQLVDQQ  
QLSLLGATTDLTGPVVERLIERYITEQVHDSVLFKPKVCRSTRSDDLELDTIRIQMENIDITQVGIVIEG  
GRQGKEELMQRLSRGVVEEFRKLGVAGSPQEMMDILLATQKTVTSAEVTPSGKKYPSSELSLTSEK  
PSPIMTINADTLVSLLLIVIRSQVRHLQARLSYMRHFIFIDDVEGGEVGYALSTFEAVLSYLAKDSCG  
LRKASRRNKRLWQATRNGDISELRAVLEPEKGEVTGEDVILDPEHDGEAPVEEPNTIEAETPSAKSM  
NGSVYSQYTPTVGQDLESTSEETSLEHVFPFQTQTPSPLAIQHVPKDKRVSMMDMRSLSGSSGYSVIS  
GHTTIDSRSSGIEGDTSEIKLSKTQDSTGDSVLMMAVEARQPDALRYLLTSLNYYPVQAILGDSNSQG  
TTLLSAAVQLAHTELIDIILDYVFQAEEDRIVIDYFAKQDLMGRTVAHYLFNAPELVSKI GRLLPWRK  
RDKNQGTPLFALCRSYDHPHYSDMVNDALNVATQTQGDGQALHLDDHVDNKGNTLLHVVNEP  
QLTLWILQRCDSDVNATNDKGFTPLMVASKYGRVDMVRALFGDPRVDLYAKELRGMTAVELAKD

DDVRNRIDDLVLFSPNPPAADGRITTVVRSFFVEDATIRLILKSGALNANATFTVTTCRRSLSDFENLA  
RWLAREHPASWLPSISSFRSPFQISSKPARSVLYDIQVRLDSFLKVMLSHSTFSTHETLWEFFLVPEVQ  
PAMMAERSEKKAIEIRVEKVKEEYEPVDDVKDVELFVGHATEMVRGVNHLTKSVIRRVNKIRNTSS  
DLSDAQQLSYRALSTLTFLPESHVAAFSRYSTTLRHLESDPHRLFLSDMHSISSTIIAILYALARPQSLIT  
LMSDTSKAIDRHTSSLRMSDTSKAIDRHTSSLRRSDRWPLGLLDDTRNKYHLEAAEKVEKSKEELRG  
LGSELRYTQQTVASELAGWQDLHEKMGKRAIRMLARRMVVREKDRLEGMKRASIFVLVVLNNYK  
PPSTSRSQKLPTTmplVVPGINNKATSNDPKEEWMNKLAKKLSdstTDSTNFARRDLPKEHRVVQ  
EGSMLTQDFNQDRMNIHVKGKDGTVKNVDFK\*

>CYP59X1|127667|Acastr1

MPKDAHPNYLPDMIRRAMPDLPVYYLDTWPFQMLVVASPGSLYQITQEHSPLKYHALKTFLQ  
PITGGGDIVTMEGQMWKTWRGIFNPGFSASHLMTLTPGIVEETVTFCDILQTHVQNQTLFRMKHM  
TDNLTMDVIGRVVLDLTQLDSQRRKNPLVDGLRMQIRWLTFGADPFERYNPLRPFVHWYNTRRMN  
KYVYWELKNRMANYQSSESVQTIKRTKTVDLALAAYLTESQGERRIQGMDSTFQKFAMSQIKLFL  
FSGHDTISSICYIFYILSINSLALSRIAEHNEVFGSDLAKTASVVIQNPFLNQLPYTLAVIKETLRMY  
PAVSSTRAGEPGFDVMDQGRRFPTEGFLVWANPQPLQRDPAYWLRPDEFIPERWLVPFGDPLHPI  
KGAWRPFEYGPNCIGQELAMLEMKIIMVMTVRRFQIKPAYEELDRHKPSGKVRTVYGERGYQIQR  
AQPCDDLPCRVAKADR\*

>CYP532A31|119882|Acastr1

MAALHSALQTLSPFPSSVPHEKSELKAYLQDAFAKSQVILESVPPPSAEETSAARSRNNTTTSTASN  
ASQISASSARTPPPSQEYAAALQKEWGKPIKLAAKDNPLGIAVFKLPSKDSKGAWFARRSVHEGLGF  
NRWKKSLEREFPESLKVQGGPVYRLSAQFPGPTTPRDFVTLLTSSTALKDPSSSSSTQPSSPLHHDF  
HEPRHFMVVSCKPIHSDCPPRIHSDCPPREGFIRGEYESIEFIREIPVQPKRSTSATDLLKGGKSRPTSST  
INKDAILRNASQKSHTFPLHHDDASDHQLSGDGHAAPSSISAERETTSEGRRRGKTISFAESRGQTAK  
GEQLAKGEQFDTHQGEDNEDETNPVEWIMITRSDPGGSVPRWMVERGTPAGIVADAGKFLDWAC  
KTEHSQSEDDAHVDGLNQQHASHEEENLRDYQTNGHLAGLNGDADDVNVSNNENPLIEPPQQTST  
APVQSGMLQNFASAAYTGLETYGPKAVVDHLPGHPAQTEPSSPPDMGEPILRGQRDENDASSLAE  
TSSVASFASADSHLGDEEENKSSSKTTSSNNKDGLLIGQDKELAKLNDRKKKLDEKLAKTREKEL  
KDRQELTSKEQAAIQKAEKHAKKEVAKQEEKYKKEVAKLEVKKSKAEAKLAEKRKRAEDKDEKA  
RLLREKEEVKAELDVVKKERDILQTQVGDQLQRENTALAAARLGRDENGKLLKEVRDEMLGGGRG  
RRTRSNSLESGGGSDRKRRHLEGAKKSVGSIVAMSKPRVIYWFRTDLRLHDSPALKAALDLHPECLY  
PIWCWDPHYVYRARVGNRWQYLLDCQSDLSASLTKLNPKSKLFFVIREAPTTLPLKLFRAWKISHL  
VFEKDTDAYARQRDQVMDLAREAGVEVIVRSGRTRYDSDELVKANGGKPTMSITQVQRAGSKV  
GKIPRPIAPLTIPDPGETPVDQEQPPQEPDINAQRDGEISYAKLAGPNGEFAVPTMEELGLKP  
ATTSHRGGETVALNALDEIIANEKYTATFEKPKTAPTAFPLQATTLLSPHMHFGSLSCRLFYWRAQD  
VVTNYAGKASQPPTSLTGQLLFRDMYFQAQASLGYKFGQAYGNSHCRFIPWHLPQSIDSQTGLITG  
SHHTDTPLAETWFHRWKYGITGFPWIDGLMRQLRYEGWLHHLGRHAVACFLTRGGCYIDWERRA  
EVFEEWLIDHEAASNIGNWQWLACAAFFSQFYRCYSPIAFPKKWDSDGKFVRHYVPELKDFPTKYI  
YEPWKAPVVDQKRAGYLVRGDGSEVAEEGGVKTYPRPMFDFDERRTVICIEAIKNAYHVGLYGDHP  
KVLDGTWRELFPDDGEGPTEGKNAIDAAMTGSKERIVKDVPDRKGDMGVDEEDGSEAAERGVLLE  
HWLGVLLIISMAYLASNRFNHGLQKYPGPFLASVTDWWRVIDVWGRRPDITQIKLHRRHGDVVRL  
GPNALSFANPKALKQIYGLNKGFTKSGFYPPVQQAMSKGERLPSIFSTTDEQFHANLRRCVNSAFSM  
SSLVQYEPFVDRTTEVLLDQTQRHFASKNAVCDFAQWLQFYAFDVIGEMTYSKRHGFIERVEDVDG  
MVSYLGLKFSYVAPIGQVPWLDLLMLKNPFLRLLDKFSIMSFTFPVVTFAKKHMNDRLAEMQQRK  
GNGDGDVTDRRGDLLSMFLKAKADHPDFMTDARVLTAVSMAFAGSETTAISLAAVFYYLLKNSR  
CYQKLEIEIDGAVMDGTIEDRSTGIVTWAESQKLPYLDACVREAFRLHPAAGLTLERVVPSQGAEIC  
GEHIAGGTIVGCNAWVIHRRPEVFGDDVDAYRPERWLEAEIDQLKEMNGTMFHFHGMGARTCIGK  
NISLLEIYKLVPSFLRRFEVHQVDPNKEWKLHNAWVVKQLNFNTTFTPRHMTAK\*

>CYP52K8|121808|Acastr1

MLHVYLPLALLSYLIVFAVYNLILRHRQRQVNKAIAARHGCLPPPRLQNQRPLGLDRLEQIFRANTE  
SRLMELFLFHRQTGYTLEQVFLRTQAFGTVDPANLEAILSTNFGDWGMGARRSITFPMFGDGIFTQ

EGAPWKHSRELLRPQFVHKQYEDLEIFREPVELIDILSTADGVVDLQPLFFRLTLDVTTAFLFGESV  
QSLKAPESTGEQTFAEAFNTAQKYVAKRFRLLDLYWLIGGKEFRDACDAVHRFADQIIDRSLSLDVE  
GQEKGGKYVFLSTLAKSTPDRNALRGQIINILTAGRDTTACLLSWAFFLLVRHPHVLSNLKAEIASSC  
QNSADLSRTDLRNMKYLQNVLKETLRLYPSVPVNTRTALRTTVLPTGGGPDRKSPVLVPKGTAVAY  
SVYTMHRRPDFYGMDAELFRPERWDEDMPLNHTPVNAKWGYLPFNGGPRICLGMDLALTEAAYT  
ILRIIQRFPTELPEGEVVDLMGVVEKQTMTLVMSITEGCKIQLL\*

>CYP6003E1|124731|Acastr1

MAAPGRINDRSTHQEANPSTSQSGTQQPPEAQMTSNAAPAEQGEQPAASRRKRTHRGGKKKRNR  
RQSFAAPSDDTNTANPARANRDLLDVPSSSTARPPFYKLGQSGGRNLSSTSLEDSEALLDHRDHRPM  
RARRESRTTQNTFGGRPGSSRNSNSTARPTYTNPVFSSESAHRRPRVYRAHRSSGGESEENDEVTD  
DRTPLMSSTSRRDRPRSGGPGSGYGGLGAQGRVNRPTQARRPSTGTSRSSQHRRQGPIWEQSHSDPQ  
QDYDVNNPPSPVNSPQLGPEMGYDDVLVTGSFGPSRSIEDRRATAPALSDHIINIDHAPGADQTYG  
NSSAPTPRAASGDQRRRTVALQAEEDVCFPIEGMSEMAEDDYMHQDQGSVRCGTRRRRSRMRWPD  
LSVLEEWSREEKEVRSEGIRTKKISEPVLVGGRLRPQKNGWHRTEEDAPYRFTYFNEEFQSTIHSQTIS  
ELLQPGQDFKELFIPDPPELSDYSSEEDDLETVDERQELSPTSCTSGSKAGTRHSSIIGESKHSREPSGDG  
HDNAQSQQPKERP KRYGPRPTFWLDVLSPTDTEMRVISKTFGIHPLTAEDIMVQEAREKVELFRNY  
YFVNYRTFEQDMNNEDYLEPVNMYVVVFREGVISFHFSMTPHPANVRRRIRQLKDYLILSSDWISYA  
IIDDITDVFAPLIQSIEDEVDDIDAAILQLHNADNVDTSKESKAKDNERKSESNGPGESGRDML  
RRVGEARKKVMGLYRLLGNKADVIKGF AKRCNQQWEVAPRSEIGLYLGDIQDHILTMTSNLSHYE  
TLLSRAHSNYLAQINIRMNERQEQTADV LGKLTVLGTIVLPMNIITGMWGMNVEVPGQVRDNLFW  
FWSITAGLLAFGIVYVYKYGGKNLHIGFISFPRASSIYEEASVEFSGSETGNLRNKEKRRESRDLGVKG  
KLLSYLESQDGIGALLKKLGDNRGKLYRALLAGNAGDMRTNLRKLPVQLPLDDPVSKLASGFVH  
AYYSAMLHPPQTYLGNKFQYRSADGSDNNMLFPQLGKAGMPYAKSVPNVRAVHGSQPDPGDLF  
DLLLARDETDDDIRDSNLGISSMLLYHATVIIHDIFRTNMGDKNISDTSSYLDLSPLYGKDAEAQRT  
IRSFRRGLLKPDFAEERLLNQPVGVCIYLIMYNRFHNYVAQQLLEINENQKFFQPPSERPASWMPN  
GDWQPPRHWA PVGIWKPAKWQELDSAQWSSYRQNLTKAAQENEA AKQEMWMLWKTA AE EK  
LDEDLFQTARLITCGLYINISIHDLRVLTRVHLHNTSWTLDPRKEIPIAGIDPRGIQRGQGNQVSVEF  
NVLYRFHSPLSRRDMKWSSTFLKQLLQGFEVKDGSHAQDKTSLTQDQLDTFDIPIVMRDALAKM  
YKMLPTVDDKLIAPAMPIGLGHAYWPGADTREFGAKNTARLFRSIEILGILQARKWYVNVFPPIQN  
LKAYSYYISYINRELATLNEFRKFFGLPEHEKFTDINQDPDIARKLKNLYRHPDQVELYPGLVCEGN  
GRCLDPGKGP KSDTALWSAVFSDAVTLVRSDFYTTDWNVGS LTGWGMREVSSVPEVMKGSVM  
HRLFQRAFPGFFAYNSLHLWQPFHIPAMNYVLAKHQGKLSLEDLSQMGVNSHNIEEVEKFIASKT  
EGDTGLKALGSQTKPLKEEEKGILGYTRTEIKQIKEI IQNGDAAYEIGAPQLAFKPWKRLIKMPETR  
FCAPTKATTICVTNYSTIVDEILAKRSIYKNPGFLDYQVIPEGALRGILTGNPTGKLK KDFEERVEGFF  
TRLRSKVTDPDEKVFMDYFTQQAQDYLSGKRDYQKLKSKVEGKEKEVQVWQIDIVSEYVHLRTTV  
KSYIDWFTNMLAHSYAMPVVAQFIADFLGFWWDWIDPKIPEGIENAKVVYEHLLNNCQDYLTYSDE  
TTVASRRVAFNKSIIWLNDRAKYGVKQVIANGAKRGEHGPNDVASELRQFGTQMALELLEGDPDK  
KTPATVDEVA AIRLSIALDAVHKSILMVSGPAANYRTYAKAIQFTEVLN YLLHKTDGSEYLWEYIQS  
LASKTSNPGEAEKKLTEAEKKLTEAEKKLQRRNSGRCVLEAQLRAVHVPLVRQVPSDAKVD AVEH  
PIDDNKPPTTRKFQRGDMLLLQVDKAQQNPEHFPNPTEFKFQRRREDTDDSGEYIYGRKKGAPFTA  
KHLTIIAITALIKQAAKLKSLRRAHNTEGRLNKA KTPDGVQRYLTQEFDQLVPFPTTWQLRFDGFG  
QGVWKGKDNSELQHGM DQVYQDGALSADGGSFTSS\*

>CYP52AA10|124970|Acastr1

MPKSLAKVHKKISKKRGN TNSL NENS RDAQRLRRAGARDDKLAKLSAARAKVNQPHIQRV AFFQ  
QATRELKAPVPVQVQGLIQSYITQDDEELAKLKTERRPGRPSSTREDLLKQRIDTENREYDAGFWIP  
DMEDPDNIARLENWMGDWTS LNTLT KRETINIIINMHPYILVSLGAGVAFLLYKVVS NILASRYAA  
EAQRLGCIPPPKQENNWPFVDRVRRNLLRADTARVFPDFMAQR FREMGVNTFEFSMLGTQGYLT  
ADPKNIQAILATQFNDFS LGPNRRNAFMPLLGNGIFTQDGKPWEHSRAMIRPSFVREQVSDLEEE  
HHVQDMMRALIVKQDGWTAPVDLQVLFFRLTLD SAT EFLFGESVGSQVANLPAEAQVNGAPKVT  
QDEKVF AKVFANAFDRYLARRGRLLDKSWLDNTPGFR LACKQTHEFADHFVRLALHPELKEKEK  
DMEKGGRRERYIFSEALAAQTQDPIELRSQILNILLAGRDTTASLLGWTFYLLVRHPAIYDSL RATILA

DFGTYTHPRDITFQNLKSCRQLQHTLNESLRLYSVVPFNSRIATKDTTIPVGGGPDGKSPIFVRKGQP  
VDYSVHVMHRRKDLWGPDADEFRPERWVGRKVGWEYLPFNGGPRICLGQQFALTEASYVTVRLI  
QRFDRMENLDPEPSPKHNLTLTNCSASGVQVRLHEARD\*

>CYP584E29|125593|Acastr1

MAMEMYLAHFHPKLVFALVAALGIIACVSIRRCFIRRFQFARGHGCQTVARSLNKDPFLGLDTIPGTLR  
ALRQHKILEKSCESFRVYGNTFTLTKELHRRAILTVEPENIKTILSLKFKDYGISHRLEPFKPLLGEFIGD  
TDGDHWASSRALIRPSFTRDQVADLTSFEDLIQDLFSLPRDGETVVVDLQDLFFRYTIDSATEFLFGQS  
VGTLKKTQSELGFAQAFHYAQKAIITRGTGLPLNMLYRDRKADECNRICREFAQHFVEEAFHAVD  
VKKEDKEERQAETKRQKHIFSHELASRTSDKHRILDELMNVLLAGRDTTASLLSNLFFMLAKNPAI  
WDKLRREVAGLQGRAPTYEELRSLTYVQCCMNESLRLHPVVPRNEREAVRDTILPLGGGKDGLSPV  
LVPKGTLLCYNVYAMHRRRTDFYGPDAEEFRPERWEDGKLQPRWGYLPFNGGPRICIGQRYALTEV  
GYVIVRMAQEFRVLESRTDGPWEESLTLTCSRNGTKVCLTPA\*

>CYP584L7|126332|Acastr1

MAEQFPFYVKTLLVGGVLVPPYVKTLLVGGVLVVALYYLYHQLTVGAARRRIIRENGCKPPAKYPHVD  
PIMGVDLFLTNLRALRENRLPTMRQRFNTYGNFTQLNLMGTVIATIEPENLKTILALKFKEFGLG  
ERRKTALSPLLGYGIFTTDGGAWQHSREMLRPNFTKSQVGDLDTFERHISRLIQAIPRDGSTVDLSEL  
FFRLTIDSATEFLFGESTNSLTPGTSMTSAAARFAETFNYSQEA VGNRFRLLGLLSHFIPNRKFSRDVKYV  
HDFVDSYVKKALEYRRTHDLEKADVKADERYVFLHELAKQTDPIQIRAE LLNILLAGRDTTASLLS  
NVWHTLARRPDIWAKLRAEVDITIGGQRPTFAQVKDMKYLRHMLNESLRLYPVVPGNSTAVVDT  
FIPLGGGPDGKSPVFPKGTMVSYSVNAMHRLKRFYGEDADEFKPERWETLRPGWEYLPFNGGPRI  
CLGQQFALTEASYATIRLMQEFKAIANRDPSPWAEALTLTCTSKNGARVSLSPA\*

>CYP539A51|126516|Acastr1

MLDAIIHNISFGSLALIGTAALTAWYVACQIRDSRIATLGGRAPKVAIYLPGLDLTYRGVSAAIRH  
KNLEFWEWLFSSFGTVGSPYTVEAQVGPQRFIFTAEPENIKAILATQFEDYGKGQPFHEDWRDFLGD  
SIFTTDGEQWHDSRSLIRPQFIKDRVSDLAIFEKHVNVLGLMGKGQEVDVSALFFRYTLDAATDF  
LLGTSVDSLHNSQVEFAEFAEVQVRVQNIARAGPMNRFVPRRSFYANLKILNSFVNPHYEQALRLSP  
EELEKTKSDSGYTFLHALARFTRDRTVIRDQLVAVLLAGRDTTAATLSWLFYELSRHPAIVARLRA  
EIHHTLGPDRRAPTYTDLKSMRYLQNTLNETLRLYPVFPNVRMSLKETTLPRGAGPSGLSPIGVLA  
NTAIGYSTLVMHRRRDLYPPPSAHFPDIMEFAPHRWESWTPKTWQYIPFNGGPRICIGQQFALAEM  
GYTVVRILQRFETVQRYWGDGEQ\*

>CYP5328F1|119780|Acastr1

MASYLLLSLILPLVSIIVWNSYKLAANYAVARKVGVPLIVLPISPENPTWVLISDFCIPMIKRIPFGSGT  
FTRYCHRGWEFYDRNRTHLELGDVFMVTPRKNVLYVCNAEALADVIERRNEFQRPLEVLLKTLTD  
MLTLFGPNISTVKGKDWQRHRKMIGSLFSEHINKVVAESLHQVRDMLHYWTTQTPNAVRSTAK  
DTKTFSLHVLTAAEFGKTFPFQSSIESAETGQMLSYSRDSLSLVLDHAILIMIVGSRFLTAPFLPKRWAR  
VGQATIDFQQYMTDMLEQEKRLIVQGAPGSSNFLTTLVRASQAVSEPAASSGGCKGAGTRRNSQG  
GLTDAEIYGNIFVLNFAGHDTARSLAYCLTLAAHPEVQDWIAEEIIRYVLSESDSSTWNYEESFPRL  
KRCLAILLETLRLYFPVIAFIRSTGADARTLNIAGKPLLIPANTLVIPSIMAIHSHPRYWGHDAIWRP  
SRWILETSIPGEEEGDAVSDREILYTPPKGAYLPWSDGPRGCPGKKFAHVETVGALAGLFRDHRVEP  
VPEDGEDMEMARKRTMDVVNDSGMVLLLQMLKPERAGLRWNTSYLPHPCSPTEPPSFSQPPHIP  
HKMSTTPPAPQSHPTTSSTHNPPSLPTSPLPKRFKPTTSADTTTTTANNNSKTTMPDATSTPATTTIE  
QSPPLLIKLSAKAKTPTRGSQFAAGYDVYRPDGMWDGMDGREIGVGSRADENFLTGKIAQNTTIP  
AHGKALVETDIAIAPAGTCQLAPISSVDLQPLLAALVRPFYPLLHHGIPSHLPSHPLPSHPLPSHPV  
PTYLPTCHRTRHYQTADRSGPEATDGRIAPRSGLASKNFIDTGAGVIDADYRGMLKVLLFNFSEVDF  
EVKEGDRIAQLVLERIYTPDVVVVEEESVRGAGGFGSTG\*

>CYP6690A2|120689|Acastr1

MSNQFWENPKLMSLLDASPRVGVLSLPIGAALLAIFGILFYVYKKVLLPQPVPVIPYDEKSAQKLLG  
DFPDMISEVSQTREVQNWLLKKVHQLKEPLCQVFPLPFSTPWVLLSDSVETRNLTTQNPAFGRSNF  
DRTGLTHLDGFHSRHEMGDEWRRTRNWIADLVSPTFINKRIQPILYENAFRLLDWFNWSKAYLANG  
RAFDAALDLHDHALDAMISFAFDEEFRHAALDPQIEELAKLKPSDIPTGSEGEALFPQAKSRPFTDA  
MYTTVEAIVYVTSSLWPAFAKRWVLLSPHFHARNVRRKVIKAQVTKALGRVEATGEAKTAVELM



LMREKKAADKQGRKPDYYNQVLMDEIGGQFFAGFHTSSTSLSWIFIHLTRNPAVQAKLHDALHTA  
FSIAYAEQLHDALHTAFSIAYAEHRVPTQAEISTIRVPYLDVLDVLRMQATLLSRLALKDTQVFG  
HRIPKGTTFVMLCNGPGFHSPTFEAAKVMRRAAGEKDTEAGWDESRDMAAFDPERWLRKKENAT  
DDDDVEYDQNAAPSMGFGMGLRGCWGKKVAYVELRILVAMVMWHFNLQEIPKAFADPKKTLV  
IHRADECFVRLKPREDAADFALQSQGASGNYPAGTGTSSDWSTRSNSRHGQGKYSLAELFGHV  
EYSGTNTLALVRKLGLSEDDSQSGNREIPFEAFGDIEKIIRRLPDREIFDCLVQYYVTEVHWMEQVVY  
APWFLEQYQKWWSSGRPLVVVDVEFAVLFLRICAYASQFLPSPSYTIDHIRGMPLTNVRDACHDIA  
GKLA AICKRLNPTGALIRVQHLLILGLQRCCEGRIRDFWEALSNVAVRVAQRIGLHRGRTAWTYGM  
HEFDKEIRCRVLCNLYTWDSVLSRHLDCPPFFTFNLTSDDLPLILASKTDDPDAPEDYSERVVQTRL  
QKFWRSPPRQVADHEPHTAEERYQSFCSDYLQHLTPAFALPSEEWDERLPRLPLQRQMLHVAIF  
ASLCYNFRPVLFCDPQLRCLPAYKQLLLALQKCTLAAAALKLLHSVSKLHAMLGRAHTRLPTIILP  
TFEAAVILVSLTIDASFPGLCPLGGEEAPMRPLDSDPLGAERAHLTREKCKQAVQEALARLEMLAEV  
SNMAKVGASTLMRLMARVPTGEVVPQTWPTLESYDATALEEFLLTVCSAETFTGSTLSFAHPELA\*

>CYP51200A1|122305|Acastr1

MFLTQVLWLAGAAGIISHLGFFIRGEHHLEAPKTFRLYVILAGFIFLTNTYCILDVKTGAKSTCLVSSI  
YGVALFCSMLVYRTLPHPLHGFPFMAKTTKLWNVIQALDSNFRMLMENLHORYGDFVRTGPNE  
ISIFRPEAVRALDGVGSKCSKAAWYDIMQPRVSVATTRDKELHSQRRKIWEKAFTTQALQEYEGRLI  
YFSKQLQKRILGSEIIAVNVSSLFYLSFDVMSDLAFGKPLNMLESDEYHFTVGLLQDGMRLGLPLSP  
VPWLVRVGYSGFAQNFKGLLAWSAQKLKDRLEDEPTKRDIMSWILDASRQAGTMKQDRHWLR  
GDCFAIIVAGTDTVASTLISIFYHLAADPKQMQLRTELQIGSITDMKALQSMGHLNGCINEALRL  
HPAIPSGAFRVTPPEGLTIAGQYIPGEVVVSAPSIVESCIEQAQDFVPERWYSKPEMIKDKSGFSPFSM  
GRHNCIGKNLALMQIRSVVASLVTQFDISFAPYEDGVAVWRDLKDQFNAHPGKLDLVFSARKREII  
TIQAGQCGNSVGSQFWQQLCQEHGISQDGNLEDFATEGGDRKDVFFYQSSDTRYIPRAILLDLEPR  
VINGIQTGAYKNIYNPENFYIGKQGIGAGNNWAAGYAAGETVQEDVFD MIDREADGSDSLEGFML  
LHSIAGGTGSGLGSGFILERMNDRFPKCLIQTYSVFPDGDVNVNPNYNSLLAMRRLTQNADSVVLD  
NGALSRIAADRLHVQEPSFLQTNQLAGPPSYTIISATDDAPGLHGHVSTVMSASTTTLRYPGYMHN  
DLVGILASLIPTPRCHFLMTSYTPFTSDNIEQAKTVRKTTVLDVMRRLQPKNRMVSTTPSKKSCYISI  
LNIIQGEADPSEVTSPQSLRSPLPKFRGLLPNPQVHKSLLRIRERRLATFIPWGPASIQVALAQKSPYLP  
NTHRVSGMLLANHTSVATLFRRIVQQYDRLRKRNAFLDGYKKEAPFADGLGEFDEARSVMMDLV  
AEYESAEDENYLEGGGDAGESEGGKDEGGAER\*

### ***Cladonia grayi* Cgr/DA2myc/ss v2.0**

>CYP51192A1|558|Clagr3

MSILTHLFRSWKSMTNAPASMPWAGTRNEILPNFRACMREFIAGLRTRLRIGYDNYARKGQAFVVP  
DPGLRPQIMVPKEHLRWMVKQPETVLSARLPQVGRFAIEYLVPGLDVNHDLFMMMDVIRKDLTRNL  
GRLQPSIYQDISESIDELMGIDTDNWRKICLWETMQKTVFKSTNRVFGVGLPLCQDEGYLRSSAAFAN  
WLEAGAIIVGQCMPSVLKPFFGYLTAIPIYIQNKSFNGLLPVFKERMENIRRRKADPTFEFNEPKD  
MITWMSTAVIGNPTTTHSKSEALAERILFFTLGAIHTTIMTAKNTFLDLLSSDPELKYETLQEEALN  
NLYREERPGRPSSSREVAGGWLAAPVVGIHNDRFYPEPEKYEPRFAKAATETPSNRETDDTQTAK  
AAQNRKLQGLSTASGSYLAFGYGRHSCNHWRSLPPTSPGRWFVAHQILLLAYVALNYDIQPMK  
RPLNPLSHRKQLQLACGGARGREIRRRKPEICEWLLPLGRTLALGDL\*

>CYP51164A2|3614|Clagr3

MLDTFNISFSFSKSAVGGALGCLLAWYAGRLTYNVYFHPKSKFPGPKLAAASRWYEGYFDNLVGQ  
GGQYIYEIDRPVIRIGPNELHVKEIEFRDTLYALGVKRSKVPYMTDMFGTPLALIGTEDHELHKSRRM  
VLNPFPSKRSVTRLESVIEKVRRLSDNMSACKGRGQDVQLHHAALTATMVDITTEYSFAQCANALD  
QPDFSPEWAQMMMSGVSEIVPLARQFPFGIFQVAQALPISITKVLNPLMAKFLKYKLLIRRQISEIIARYSS  
SQGEFSASGTEKPAHAQSIFHEVLNSKAPDHEKTVDRMTQEASNIVAAASETTSSVLATTIFHVLDN  
TQIYDQLKAELNEAMEDPKSLIEWRRLEQLPYLVSLFYFLLSHGTD\*

>CYP5696B1|222|Clagr3

MSVLIFMLAGVAGIILLQPFIAAYARDPHRLRRFTSASSIAAFTPLWLMYHNYFGKRYIAVDKAHEKL  
GPIVRIAPNHISFAEPAAYKEIYGHSTPAIKDEWYDNLAAGNPSMATATDKTVHSQKRRNLSNVFS  
PKEVVVMEPRINILTHKLLHALKKKSQGEMLSSADRYAVVNGAFDLRPWINMFSFDAMGSMCWSS  
DFGFLEKGDDSCFARTAEGSVIPVHAMETFHVGVAFSTLLAHLPLQWYKLGRRVFKKTWSGQCAE  
HFGSMTRFKVMERMSTPPAGRDLFSHFVPQATEKRPVPMQMPEIIVENQVMLSAGSDTTQSALTYT  
MFLLAANPDKQRALREILEKTLPAEEVQGLVASYNCLKSIPYLKACLDESMRLYAPIGFGLPRRTL  
KGATVGGHHIPGGVTISAPVYTIQRNEKLFHDASEYIPERWLPEDPDTTEEERRNLKDYYLPFSLGGR  
ACIGRNLAYMQMSLVVSAMVLAFDWELAKPGFEIVPEERFIFNSGPLPVKAKPRVEIV\*

>CYP61A7|742|Clagr3

MDTKASSFASPSASVRDGDLLDVEYAVNVGNANLLTITFTILAVLIAYDQIRYWLNKGIVGPAFKE  
PFIGPFLQSVNPKFEEYYAKWKSGLSCSVFHKYVFLGMLVHSGRALTNFDYRFVIAATRDM  
RKVFNSPAYVKPCVVDVAHKLLGADNWWFLDGPAAHIAFRKGLNGLFTRKALQSYLPGQEEVYRRY  
LRKFLKVTEDAGGQAVPFMPFEFREVMCASVLRFTCGTYSDEAIKKIADDYYLITAAELVNFPIILPF  
TKTWYGGKSSDNVLAEFKASAKSKARMAVGGEPTCIMDAWIKNSFASKKWLEAEANGLCTENF  
GEKPTVLSREFTDYEIAQTFTFLFASQDATSSAATWLFQTMAQRPDVLDRVRKENYDIRKGDIIHA  
AVDLDQLESTTYTRAVIRELLRYRPPVLMVPYAVKKAFFITDITYTPKGAMVVPTTYMALQDPEVY  
PHPEIFDPERYYTGDAETKGAKNFLVFGTGPHVCIGQHYAQLNLALFLGKASLLLDWTHHATPQSE  
EIKVFATIFPMVR\*

>CYP51F18|758|Clagr3

MLYLITSPIKMGFYVLNIIAAVVSMTIVVLTTVLQQVLFKNSNEPPLVFHWLPVIGSTVTYGIDPFKF  
FFDCQKKYGDVYTFVLLGRKVTYVLGSKGNQFILNGKIKDVNAEEIYSVLTTPVFGKDVYDVPNAK  
FMEQKKVPDPILRQHSMFPVFTPIQFIKFLTSDALRAHVPLMEDEIRSFLKRSPHLKGEKGTVQIAKII  
AQITIFTASRSLQGEEVRRQLDTTFADLYKALDDGFQPINFMLPWFLPANRKRNIAQRKMTQIYSD  
IINARRAKGGHKDSEDMIWNLMGSVYKDGTPVPDNEIAHMMIALLMAGQHSTSVTSSWIMLHLA  
ANPEIMKELYEEQLRVLGPTSIPLTYENIQKLPLVTNVIRETLRLHPPIHSIMRKVKVNPLRIEGTSWIVP  
PSHVLLAAPATMGKSDEFFPNAAVWDPHRWEGMADPAEQEKEKMDYGYGLVSTGADSTYLPFG  
AGRHRCEQGFAYVQLTVIVIMMVREFRFSVGGKKEVVATDYSSMFSRPMEPAFVEWERRVDAP\*

>CYP5519A2|1415|Clagr3

MTHDALHGLMMDISPSIMVTASVGLLMILGILTLRSVSSDIILPWVPQLKGVPILGAMPIYLKHGMP  
QLLSKLIAIGDNGISYAHVVNNVLVSVHDPAMVREVLAYPEHIASREGDPGRMSWSPFWTLRRLIG  
NSLFTDVGPESHHRNVFIREFNSTKSNSEKFDTIAKIATAHANALTGDVSTNEVEDIRYSADNFAIA  
LWGDILYGNPNHYVGGRVLSLSETLITLAGNPWPSVWYSFLLFLKLVNPGEPTYSEAKLRAKVAKV  
VENNIGKLEEYEQNNPDAPLKTIRNLSVMTGGGITGPLSKFAFEFTNLNLFGGHHISGLNVTWSLIE  
LDKHPRCLAKLMAEINAVDTTDFTNVNSKMPYLNNAVIMEINRLHPTVHATLRVINREVKLASSKRP  
VVLKPGMLIYLSYWHLHTSREFWGPDAVGVFPERFLGGYRKDQPFMSFGYGPRNCVGYKFATLAA  
KQYLITLLKTYQVDVKDHDHEMKLGTLLLETTKPVAVKVTRRS\*

>CYP52BA1|1521|Clagr3

MAWLSFGFFLGA AVLISLNLVSSLIARRRLNIEASRQGCEPPYALPSKDFFLARLLGLLKATREER  
GPQYLLDTINAEAGEDVHTFHVHIFPRAQTLMTDPENVKAIFVTHASSFEINAHRSIGFRPLLDGDI  
FTSRGEAWRHSRALLRPQFSREQLSDLTLEQRHVDTLALSALPTGPDGWTDTVDLQPHFFRMTLEAM  
TEFLYGHSPSQLDADPSAPSTAVFGHHMDAGKTYINTRLAVGKYHWHLIHPRAFTNHCNQVNAYV  
DYFIQQKFQHRWWKQSPAPLDNDKPKKFVLLDELAKQTSNAHVLRAETLNVLSAGRDTTASLLSF  
LFYFLARHPATFSRLRSTILSTFGSNPHDITFPQLKNCTYLHHCINEALRMTPIPIMERVSLEDTTLP  
GGGKDGQKPIFIPKQSVLISYALQQRKDIWGPDAVFRPERWENRRPGMEFIPFGGPRKCIGQQ  
FALTSASYTMVRLLRQFDKCNMEMPAGAGIRFQHGISIRSGTGAVVRLREARPTVVDENVGDGEQ  
EKV\*

>CYP511E1|2336|Clagr3

MSHLRSFTCAAILSLTIIACIRRVYFHPLTKFPGPRTASFTAWHGFYFDVLKGGIGVKRFSSHLHORY  
GPIVRVAPDLLHVDDPDFFREYHGHGTYVKSFFYRTLGA PSTLLNLQDPHQHKEKVEKAVCIIE  
QHQQFEDEPLDIQTLRYFITADTLMESMFGYSQELLSHLNRKGEPPPLFACIDGFLSHIHWMTNFPLL

ARLAQNLPAAIARKILPGYVGYREDCARWIKIADRRSNGVYTDSHGRTVMLDLLLEDNLNKGH  
HRLSLEQLIDEALIFLTAGTDSTSYSLSAATFYVLHTPVVLQRLQEELCSVPRGERGRIEWRVSVQNL  
MTAIKETLRLANPTTSVLPRVVPRSGAHVQGGQFIPGGTVVLTITLSIHQNAKLFLSPESFIPERWLGE  
KGRELEKWFVPFSKGSRQCIDLNLAYMELYLTAFANFFGRFDMQLLETDERCMEWIDNGVAVNASH  
VKVTKSTVL\*

>CYP6308D1|2782|Clagr3

MASEAGWLGIHQYINQSIFSMPNPD LKTAYFEASNHVCSILDGQKIFPPSAGVLPATGWLIATRPITA  
LVWCLSSLWFVAITWKT VYNLFLSPLRNIPGPPLAKITSKWLT FNELAGNRSLVVAQAHEKYGPIIRL  
APDELSFADRSCIKELYLRGSKFPKSPRYDGFASGTRASFDMTDIDQHRERRNLVRHVLAQSNIDEC  
ETLIADQVRKALLWIPRVKGQSVEVMLWLRRLMLDTAGGLFLGRSFDALENYEPSFLGDLDDFFA  
ITALRWFAPWLLTILSWLPSTSVQHFLGAQRRGYQYGRKAFNDYIDQYGRHSGRIDLLTKMVGSED  
YAPMTDAEIADELGSLLVGATDTTVVVATWLLWELAQRP EWQMRIRQELRDKNVNFIEGVPKYKS  
IASLPVLNGFVMESMRMHPAQSIGLPRVARNDGESIGGIKVPAGTMVSIQSRVVQRDPEIYPSPNDF  
LPERWIETSGGTKEMKDSFIIFSKGSRSCLGQYVAQMELKFFVSAFVNGWNLRLGKETTKDTMMQT  
DYFLAFPKARECHIIFEKYLEPGGTAMKQTSGLITSYD\*

>CYP532X1|3083|Clagr3

MLHDAYWLAFLVLAIVTVRLFATRYLSSLRKFN GPSEFY PINSATTKGRRNNTIFSAPNKLYHDNL  
RKAVGSAYSVTSVLR YELFVDPTIGLFLKTLNQR FANRIGAEGVIDFAAWFQYFAFDTIEELTYGVKD  
GGLTESGRNVNGLLG YIQSFLGYGYVARQMPVVDKIFKQNPISVLSAGGWFLGKDFPGIPFAIKRIQ  
GKQERLKTISPEVADSATRESLLDGFLRAKQEH PETVTDREV SITLT AFFYLLKNPECYSRLQREVDE  
NFPAFGVKALENPIDYTKAKTLPYLHVCLQEA FRIHPASGFNNERNVVDPEGATICGERIPGGTIVSCS  
SRIHRNKDIFGEDVD SHRPERWLG DGEKVKEMN RAMFQFAQGNFSCIGKNISIMEMIKVIPAIIRAF  
HLSLGDPDMELKVFENGQNV RILNLNVRAERRWE\*

>CYP51198A1|3212|Clagr3

MSFDADVHWTATAGRA FVSVVACWTLYSVAVYVYRLTLHPLAGYGP KFAAASYLYEFWYDVVL  
DARYTEEIAKLHERYGRHPDASDPKFIDVLYPVAGNRIRNKT KHQMSGFGGLSLRVDRLVYRRHRD  
TCSPPHASFTAQQFFSKSKVLRADDIVHQRSRQMCDKLLAQCGRNWFDAGGAFNCFTTDAIVEYC  
YGESPGFLDQEGWEPNCKDVFEALETRSHFTRHLPWVRRMLHWVPLSIMRTISSTYDAPLRYHVQ  
MPGLLKRVIAVGGTGEAESRPVFAELLKSDDLPPQE KTPKRLAYDSNGAALAGPQSTATTL SNIVY  
HLVKQPDIAKRLQEEIMANVPDPAELPSWPTLEKLPYLSAVILEGLRLIFDFSQERLSYEPSQERLARV  
AVDEDLQYEDHGGMENS SLPTKTVYTIPRGTA VGMSACL VHLDESIFPEPNEFRPERWLDDAGQR  
HSRLDRYLLSFSKGSRFCVGFQ MAYCVLYVSVAELALRVLPRL EVRDRSRYGDEQVYNDHGEREPR  
KTTKGYDMRVVDI\*

>CYP51187A2|3214|Clagr3

MGLQSLGLTLLFTFLAYGVYVYFRLYLHPLANFP GPRLAAVSTLWRAYHQVWRD GKLHHTTKGL  
HKRYGPVIRISPNELDFCDPAAFFDIYNNTFN GIKDPDFYNHLRVESDTMLIVDGPADHKARFRPV  
ATLFSARQYETHEASIVAKVEQF SHLVLSAKRGRVCSLAAGYRSLTIGIMYDFIFTDVPDHF KALRG  
PNFDDPLTVASADSLNWT SWLIRNFPMF SAMVMKLS PAMVSRVTSSFE GATQIVEYEKNTKGHKN  
PDCVAQRLLNEHIQDRPAVASATLDSVVRSEAIGFMLAGTVDP PNILSLSTFMVARDLALQARLYQ  
ELKSSWPNMQSPMP SFKVLRSPLLRGIVQEGIRLTHGVATGPSRLVGKGGARVADYDVP AKAVVA  
APSYFVHMDPEVFPNPEKFEPDRWAVDDRSNSLVAFSRGRRMC PAEQ\*

>CYP544C3|3666|Clagr3

MYAIALAVTLCIGLWFLQGGQRSAIRRHGQRLPRPPGTLPLAGNGIWFLQPRHKLLDWVQ CERLV  
GFSTYEISVPSLPPGIVINDPQNVEHVLKNNDVFIKGEFVRTRSWDLFGNGIINADGDLW KIQRKAG  
LRFSTPNLKTLDVVLPPIVADTERLLDAAAKNATLV DLQSVLLELTTRLMGNMAYDMDMPASLP  
FSKAFDFASGAIGERFQNP FYKLKEFLFGAPLRNSIHEVKTFGSCIVSAAVQKRKEHIDAGSV DPLQN  
NLINSLLDNIEDHDIVADAAMNYLSAGRD TTAQSLTWTL YLLMRHPSVQYRIISELRNTLATASHSL  
HLSFESVQLSVLPYTS AVFNEVLRLYPPVPIEIKECTAATTFPDGTWLPKGAVVMWANWALGRSKKI  
WGDDADD FRPERWLVS GKGAGSTLKS VSSYEYPVFNAGPRLCVGKKMAELLATYVIADLIWKYEF  
KEFFGKLSNKG ERPIERKSRNSLTLP MEDGLLCYVRRRGEGSVAI\*

>CYP541A11|3770|Clagr3

MTTPIPPGVPVLVGNIFDVDPSTWVSLQKLWEKYGEIFKITVLGQQIVFVGSVALCEELCDEKRFK  
KYVGGPIVEIRNAVHASLFTAFETEAIWGVHHRVLAPCVTPEAVGGSFTEVRDCAYELTAKWRALS  
GTPVSAISELNRLDIETTTLCFYGRKLNNITGPESPMIKWMNDSTSEAMKRPTRPKFLNSLFYQSKFE  
KACKAMRKYYAAECLEYRKANPTDRKDMLYTMMHAKDPETGQSLNDQQIIDEIVTMPIGSSTAPCV  
ISSAIYYLLKNPDCISKAREEIDSVIGNSEFTHDHLESPLYCAGIVRETLRLSAAAPGFNIEPLPETKGPV  
LLGGGKYEVPAKQTMIIVLHGVNRDPNIFEEPEAFRPERMVGEAFEKLPEGAKKWFGNGKRV CYG  
KNHAWMWNMITLVALLKDVDVFEMADPSYQLKQDGFNLRPVGFNVKVKARAQ\*

>CYP50334B1|4140|Clagr3

MPIELLAAPLSSSNLITISMLIFIVSFTIALLVAYVLWNPHACRACTIPMLQNKFSNPKACREILACHG  
YASGDRNTIPAVESRAGPNQRLVKAFNIDNAFTTKNDEDRKSFTSKARAKLSAVKEADWKRIASH  
AEALIHHLGRGKQCCLDSLVRSTSLKITLHTMFKLDPMEMKDETIGEITSSINDLWVESKKPGEPSAP  
MKNKLRQALAGLPGAEFNGEENPLNFILPAYETLWRVVLSGFIEVTFREGAHPGWKYELVRFIEEP  
TIDKLKSTSYDTSVSMESITNEALRLFPSTKSIVYREFRMDTKKTTDVVIADIEKCHRIPSIWGANAKTF  
DPSRWKNLEAQTKAEAKEAFMAFGYGKFTCPAKPVYGPMMIAVLVAALAKHITAEQWTLLEYLR  
AGSEAGYELRGSEAFIADRKSIEKIMHRKETAWAGAGRYTVGSQ\*

>CYP59U3|4315|Clagr3

MATKDYARKSQHTDAGYYASRICNRYLAYLYVKQPPHLCIYSEGLCTSTQSIEKRLRFIACNLRMP  
SLGLTETGRKVMTPGNLTASLLIGASLLAWLVSFYPSRKHIAELRTRGLPVAPHWNWISGNLILV  
AKMFPSMPRKAHKTLFGDILRNFFAQEGCCYLDLWPFSYPLLMVVSPLASQATQTCTAVACERP  
PKLEWFFKPLAGGNLFDLPEKDWKPWRTIFNKGFNADNLNSFVPGMVEETRKYRATLTKEAESG  
ELFQLDSVTLRFTIDFIGRTVLNVSLGAQSHYNVLADSMLSQTSWQMPNREINPLEFLNLPRYVMQ  
WWNGRKMMDKYIGAELDKRFQDYQEKQIRPNSASVIDLVLKAYLAGSAGNPDDAKTNKLDPRFRA  
FATAQIRLFLFVGHDMSSTICYVVHLLSLNANTLKKIRTEHDTVFGTDVAALPATIKARPQVLGLLP  
YTTAVIKETLRLFPGPSAIRQGSFGADLVSEDGTRYPTKDIMIWILHTAMHRDPQYWVDPDSFLPER  
WLVDPGHELYPRKEAWRAFEWGPNCIGQSLAMTELRLTAMIVREFDFKPGYEEWDRLHPRKGV  
QTYRGERAYQIEEAAHPADNYPCKRCMTQ\*

>CYP51189A1|4783|Clagr3

MTRRNPSGIFALKLFGTKYNTVWTPSLIDAAFNNHHASLNAIEPRWTLLRKVFGANGSGKDEYV  
HLYTNDQVCLANAHSLTGSFHIAQTTLHAIQQHAPNLLSFAERPIDQNPWEQANANPVLHDS DIVEI  
SLFELISRFVAHVSLPTLVGTEFLEIHPITVEDLWDLDDGGFKWLKWGFSRLWGIPSLTRAHIARRRL  
AALQSFHKAADAVSNGDEAKEPWREIGDLTDLMKERRTVWKRFQTSLDVRAACDLNLLWAMST  
KPACIMFWMLLHIHTDPTLLTQLRAEMAPFVLITRPPQILSIPSPRLSIDLPALVTSCPLLKSCLYETL  
RLYTTPSPTLFAKDTTLHDPEGKVRSHQDYILDKETYVTAPLTLHHHNPAYFWQPHEFQPRRFLK  
ANENDPLTEHPHLNKNHTTNPPKHSTTPPPSTPSASAPPPVQPAPTQKQKS\*

>CYP51F17|4971|Clagr3

MALAAALLLEFAALILLSLSLYRLSQYLFRKDEPSVVPHWLFPVGSAITYGQDPYAFFFRCKREKYGDV  
FSLLLGGKMTVCLGTQGNDFILNGRLQDVNAEEIYANLTPVFGSGVVYDCSNAVLMEQKKFLKF  
GVTAELQSYVPLFEAEFNDFVTHSEALQGIEGSFSVTRVMAELTIYMASRTLQGKEVRQKFNSNFA  
SLYHDLDMGFTPINFMMPWLPVNVKRRDLAQRTLARTYIQIIEARRKLEKGQAMENDMLWHLM  
SSRYKNGNPIPDQEI AHMMIALLMAGQHSSSSIASWIMLRLASRPDIAEELYQEQRLLGPCERGMR  
RPLTQENISLLTLNSLVVKETLRLHAPIHSIMRAVKSPLSIRTNRADGLEERVYHIPTSHVLLSAPGVT  
AQSAEHFENPSYWDPHRWERTAVKEGDEKVDYGYGLVTKGASSPYLPFGAGRHRHCIGE QFAYLQL  
GTITALMVRDFKLSLMDGETAIPGTNYTSLFTRPLDPAMIRWERR\*

>CYP61A1|5505|Clagr3

MASLVNGSFASPLADANMRIVTEGGWLAKVYNGMSGNLNVLISFLLVLVAYDQCKLQDANGCGVR  
LLMWEIVMYVWNKGSIVGPAWKMPFIGPFLSSVNPKMDEYKAKWASGELSCVSVFHKYGWPCNG  
FGWGCQLTAMARFVVIASSRDMARKVFNSPGFVKPCVVDVAYKLLRPTNWVFLDGRAHV DYRK  
LNGLFTRQALD TYLPGQEEVYDKYFEKFLEQSRKGDQEKGVPFMYMFRELMCAVSCRTFVGHYMT  
EAAVKKIADDDYMITAALELVNFPVPIPTKTWYGKKAADMVLNEFAKCAAKSKARMAAGGDITC  
IMDAWVKHMLDSAKWNEKVAKGLPVDPSEKPNPLIRDFSDYEISQTVFTFLFASQDATSSACTWLY

QIMADRPEILDRVRAENLAARNGDKNARFSMDLLEGLTYTRAVVKELLRYRPPVIMVPYIVKPPF  
VSETYTAPKGAMVIPSCWPALHDPEAYPNPDYDPERWYTGDAETKTKNWLVFGTGPHYCLGQT  
YAQMNLIAMIGKASMMLDWKHIAATPKSEDIEVFATIFPQDHCPLIFTKRPQC\*

>CYP619C8|5770|Clagr3

MTKWSKKYGGIFSLKRYKNNTTVVISDWKYIKYLLDKKSTLYSSRPKSLVVDLITHGDHILMMQYGPT  
WRTMRKLIHQTFMESRCDKEHWKVQEAEANQMIYDFLTRPKDNMLHPKRFSNSIIMSLVFGIRTKS  
IDDEYMKRLYHLMDKWSLALETGATPPIDSFLLKLIPQRFMGNWRGRAVEVGDLMSTLYTEVLQR  
VYARRNANIKKDSLMDRVLDQQEKNRFNEHQLAFFGGTLMEGGSDTSSSLILAIQAMTQYPEVQK  
RAHAEIDATIGNDRSPQWSDFSKLPYINMIIKEAHRWRPVLPLGVVHSVSEDDHVDGMHLPKDISTII  
LNVWALHNDEDRWKSPEAFIPERYEDFPELSPVYASSDKRDHLGYGASRRICPGIHLAERNLFIATA  
KLLWAFDFSQDASLVNDTSAETGSSQGFMHCVKDYGCRIDLRSEAKRETIERERAEEEFVFNRYD\*

>CYP51201A1|6448|Clagr3

MAGFEVIVICLTLLILYYVSTLIAYGLWDLPGPALAKVSNLWRFIATWQGHLELVLRELHRKHGKLV  
QIGPNVVSADPDAIETIYGKADLPKGFNKPMMHNYRNGKLIPTLLTATDQGIHRLRTAVAHIFS  
MSTLVQLEPGIDETILDLIQQLAHRSAEPHRSCDIHNWLRYPFGDAIGRISFSRPFQFIQQSHDIDYML  
TNQDKNSKYLA VVGQMPWLDHLLRKNPLFPLPSFLNPFSAAPVIALAGQIFGQRMADDEKTGKG  
SDYLDMTSRILAIKRANPDQIPDQAVIGYNLTFLQAGSDTVSIALRTIIYYLSKNPPMQRKLQAEIDA  
AKLTYPVTWKAQAHLIYLD AVIKEALRIHSPAGVPLERVVPPTGLNLPNGRYLKPGTIASMTPWTLS  
VDEDVFGKD ATKFNPDRLWLGPDSEDEVFHERLRKMKRADLVWGHGPRSCIGKPIAQLEMYKLV  
PTLFGFLDMRLANPEMEWRYGTIITGQCDMDVVISWREGVDRSVLRR\*

>CYP5080Z1|6778|Clagr3

MSTNSSITSLWGESSFTSKLADIFHFRKTVNPAYTILQGPQTLSTLMRSPDLSSTLELLRKIPHSFSFY  
IVLLLIPLFLHSFYKAYATPLRHVPGPWIAKFTRFWLLGAINSREYQRINVELHRKYGPVVRISPNEYS  
IDDPDAATIIYRSRDQLVKAPRYSSWGLPNTEANIFTSRSEHNAARRRQIAPLYQLSALTNIIEYQVDL  
TSAILLSRISAFASQDRPIDLCQWIQYYAFDTIGTLTFGKPLGFLDQGEDIAEVISTIHTYSRYGGVMG  
VFNELHPYVFRFLQFIAPKGEVGIAAIIYAFAAKRIAEWNCRENDKALSVEQNEGGEVLKTDYLTSL  
LAKHRRTPENFSVDDAFYHIISNVVAGGETTGIALTAAMYLLVKAPRVLEKLARGELEGMKRGKDGR  
VGVLEAQNCGYLSAVVKEVLRFPAGLNLPRVVPKGGLVLVGRWFPEGTIVGVNPWWAHANTS  
VFGLDADDFRPERWLEADQAFANRMEQYFFTFGRGPRTCLGKSVTLMEMMKIIPELVLKFDDFSAY  
PLREWSVRNDWFWKQEDFMVRVRERRTERP\*

>CYP5127F1|6860|Clagr3

SGSTYLNISCTQYIIFQSLPLQSYLSAGHLQIILLTPIPLLSRLSSPSHQLRNRTKTLFTMLIDSSLLLRTSS  
WTMIPTLLLIGVIFLLFSLIFSLKEKPVMPSPVVFQIVKKYIRAWAYLFNGPSIVQHGFDQSHGKPFER  
SPDTRMVVFVSSPKHIKELDSTSDTILSLNGAAKHVHNPTPTYLRLVLSPLLTLSRNQMLQPLYTMNG  
FNWFDQRGVEGVGFVRTLRLLTNNLPRLPLDLRLVLTTRWSQSLSDRATVSDKGTVYAPVYPIMM  
NLVLLNARSFLGEDLVKNKKFMASALSYVEETLFNAEIVKLLPKFLAPVVGILSRCLNSHRTFFQS  
LIPATQQRIEEQASKNLGYSGPKHADCIQWIIETAPKQSPWSAERVYIELMAIWFGSTIVYVIHDLCL  
HPEYIEPIRRELEKSYEEFEHTGYGLPLDSFIKESARLTPVESMSVRRALQPFTLSDGTHIGVGEWA  
CAPSGAINKSAEYYPSPDQFSGFRFIDAAHLNAQEGLPHSIRPQQPNPSKLTVDVHDSFLMWGTGR  
MACPGRYYATAFMKVVAQLLLQYDFTLMEPDAPRWISWRVARIPRPWTKLAFTPRK\*

>CYP617AB1|7119|Clagr3

MDVPWQLITISSLAGSFGVLRLAPQYSPSRYFIATFVLVFLGEIIAIIWQAILWPRFISPLRHLPEPPGA  
SFLNGHFIIAREPTGHPQRRWFKEVPNDGLIRYRALLNQERILPTTHEAYKEVLSTKSYEFIKPSMT  
RNLARLLGVGVLLAEEGEHRQRRSLDPAFETRHIRDLHPTFWALSACLVRALTWIIENERKGTI  
TSLSDAPVVEISTWTSRATLDIIGIAGMDKNFDAIANPDSELYATYQKVFPQTSQGQQLVGVLSFFLPL  
WFVRSLPFAHNETMAGAATTIRKICRELISEKQEKLKLMQKEVQEPRFQGSTDKDILSVAMKSCQFT  
TDNLVDQLMTFLAAGHETTATSLTWACYSLCQYPEIQSRLREDVRTHLPSIDDDSETITAALLSQCH  
YLHAVCHEVLRFWAIVPITLREAAHDTTIQQGFVVPKGTIIICPWAVNTSVSMWGPDAEKFNPDRW

TAPGQANRGAESAYANLTFLAGPRSCIGKQFALAEFATLLAALVGKFEFEFEDPEYPAKMKIKGGI  
TTRPKEGVSMRMRPVEGW\*

>CYP532A34|7337|Clagr3

MMIEEILSSLLRHWPAILITIAYLAKNRYHNGLQKYPGPVLAASLTDWWRFFDVLGRRPDITHINL  
HKKHGDDVVRYGPNALSFANPQALKTIYGLNKGFKVSDFYVQQAMSKGERLPSLFSTTDEQYHAE  
LRRCVNSAFSMSSLVQYEPSVDITTAFLDQTEALFTSQNKVCDFAEWLQYYAFDVICEITYSKRHG  
FIDSGKDVDGMVGYLGKLFYSYVAPVGQLPLLDRLLLKNPILRFLDKHNIMSFTFPVVTFAKARMAE  
RLSEIEHQKSKGNTAAANEPIAGNRRGDLLSMFLKAKEERPDPFFHDGRVLTMAVSMAGSETTAI  
SLAAVFYFLCKNPAYAKLMEELDQAISNGTSLDRVTTTWAESQKLPYLDACIKEAFRLHPAPGLVI  
ERVVPKQGVICGEMIPGGTIVGCNAWVIHRRAEIFGKDVEAFRPERWLEASGEARKRMEGSMQLQF  
GMGARTCIGKNISLLEIYKLVPSFLRRFEVQLADPTKEWKLHNAWFVKQLDFNTTFKPRRSPATAK  
YQ\*

>CYP548BG1|7493|Clagr3

MGLLVVSPLGLTGAQLVLVCLILGSCYFLLHAVYNLYFSPLANVPGPFFAKVSGLPSYYHALRGDR  
HIWIWQCHQIYGSKVRVNPSAVVFQSAQAFRDIHGFKSNVQRSMKYKFWQRNESAISTFTTTDIAL  
HHKKRRILNLAFFSEKSIRAAEVFIQKHIDRWDELLPNGDSKDSQPKNMTEWSDYLVFDILCDLCF  
GRSLNIKDPGNKQFKGIPKVIHSYMTFTYPTFRSPFLGLLLWLKPRGLDKLFEIISPDIKAYFAFIDESI  
AARQKDEELSERLSTDGKGGRQDMFHFLFQATDPETGKKGYSLQELFAEANLLVVAGSDTTAITLS  
SFFFYIVRNPRAYKRLVKEIRSTFNSADEIAGGPKLSSCKYLRACVDETLRMSPPVPSELTRTVLAGGQ  
MVDGELYPAGINVTSEWSNGRNDYGDPNVYRPERWIVDGEADVSAAGEVARISSYLHPFSAGWG  
NCVGQNLAILLELTTIARTLYRLDVRAEPGSTLGEGRPELGWGRDRKQFQVDDAYVSIRDGPMIQ  
FRKRNA\*

>CYP6171A2|7645|Clagr3

MPTMIFASLAPVGAQILILSLSFVVCYSIYRAIYNRYFHPLRGFPFPWGSITDFFKLWILSTKQAHTL  
GLKYHAEYGPVVRAAPNLLAINDPLLLPQIYHRRVDKTDVYTPGVLGELAPPFQTIRHDEHAACKR  
RVASSVGQKFTLTNLKPLEGQIDARIMQWTSVINDRFAESGQKLDFAAWSQWFAYDTICQLSFGE  
LGFVKEGRDVEDLIGNFHKMAPFAAVVGALPWLARPFLENPITRRFAMPKPGDGTGTGKIMAFRD  
KLLEQRLSDPKSHQHGDFLDNILASKNADGSSITVNEVKTECFVLMVAASDTTAAFFCGFVRFVIET  
PGVYEKLVAEIDDFDKRGMLAHPVPLYEEIMKLPYFKACHLEVTRFYPSTPMIPRYVSDGGMPLYG  
MHAPAGTEIGANPYVQQRDKGVFGEDACDFRPERWLESVEKANMMEKYILTWGYGTRICLGKNI  
ALMETYKLMQAQ

>CYP5168J1|8086|Clagr3

MAAIFGASTGLASHLLFYIRGEHMYAHVLFYVYITLAVGIFQYHLYGLRYEVSKASTSTAVIISYL  
AALFASIIYRIHFHRLRSFPGPRLAKISKFWHVYQVRHSMNHRLLERMHSRYGSFVRTGPSELTVFV  
PEALSALDGPKNSTKSADWYDLSQPLKAINTTTRSKAEHDWRRIIWDKGFTHALQDYDLRVLYG  
TQLEGHLSTTSGQPVHVNDWFYWFSDVMGDLIFAKSFDMLVNERWHHAILMMRDFMWLLGPFS  
PVPWLALVGFGIPGIAQDWKNWVGWCKGIMAERIAEVEKPDVSSWLKASKEQDRLEKDRIWLE  
GDAITMIVAGSDTVAITLTFAYHLASCRRYQSRLRDELLSVPSFTDIEVLLKLPILQSISETLRLHPPV  
PTGGLRDTGPQGLTLEGQFIPFTTVVVPRYNVARLERAFTTRPEEFLPERWTSRPEMIKDRRAFAPS  
QGRYGCVGKNLALREISYLIIVTKFDVTFAPGEDGIRVWVKDMKDEFTAAPGRLMLVFNKRQKT\*

>CYP53A63|8118|Clagr3

MLLDSLLTPYTLILLIPLIYLLPYLRNHSIRDIPGPSLAAFSNLWLLYQCRRGRRYLAVDEAHKKYGP  
LVRIQPDHVSADPSAIPVIYSHTGGWLKSDYYDAFVSIQRGLFNTRDRAEHTRKRKTVSHTFSQKSI  
GQFEQYMTFNLQELVKQWDRLSETAIASGQPWAEMDCLHWFNYLAFDIIGDLAFGAPFGMLPKG  
KDIAEVKMTDPTTYAPAIEVLNRRGEVSGTLGCYPAIKPYAKYLPDSFFRDGVRVQNLAGIAVA  
RVNARLDSPDEEKGGRKDLLARLMEGRDENGNKLGREELTAEALTQLIAGSDTTSNTSCAWLYWT  
LKTGPMERLQRELDAAIPEGVEIPDYDMVKDLPYLRNVISETLRIHSTSSLGLPRVPPGPGVTLLS  
HHFPPGTILSVPAYTIHHSPSIWNPTSSPAFSPNVFNPDWRNEGTTLTQLQKDSFIPFSTGPRACVGRN  
VAEMELGLIVASVARRYEFVLREEGELETREGFLRKPVRCVLGMRRRRRQSG\*

>CYP5574D1|8153|Clagr3

MALGTAFLVGfVIAIVVLLLRQLVSEWDAPWMDRLPPYLREKILMIAYLGHGPKMIERQYRKFGQK  
PFVLQTPGKQIFVSSRQHIKELSQASATALSMQSVAKEILQPMHTMQGFDVKDQRGVNGYHFLLA  
IRKEFTSQLPTTFSRLEKAVSDEFSKELSDCTVVEGKHQVPVFHLAHRLIARANLTACFGADLSSDPE  
LVKAAMQFVMDCFVAGEIIQAGPKRFSLPLAYLVTRRYKACRVLADALVELVERRREVASRDRTA  
QKPADGLQIMMDACPKDQDWSATQIAHEALAMFFFSVLPLTNTTAFTLVDLCSHAEYVTPLRQEL  
TRGWSEFGHHVEGLPLLDSEFIKSSRLNGTEWVTSRRKALTPFIFSDGLYVPRGSWIYIPTGSINRDAK  
LFNDPLQFDGFRFAQEKPSRFTDVS RDWLIWGTGHVICPGRFYASLILKLVL AHTLRNYQCEL RDPG  
KPQTKMWRSGIRPRKDLTILVSAREKQDEDLGLKL\*

>CYP573A25|8435|Clagr3

MDAVNFVFKILSAITLGRCLTLLSIILLSFSYQVIYYRFFHPLSIFPGPFWASVTRLYSAYFNFVGRHYL  
HEWELHQKYGPVVRSLPTLTVSDATFLPKIYNRYADKSQHYITGSFGKIESVFNMQKHKQHAHH  
RKIVAGPYSFTNIKGMEPLIDARIQAWISKLSDEF AKTGQKFDFA PWAVYMTYDVISDIGFGGPF GFI  
EKGEDVGGLIKGFRDGLPLFGVMAILYPFTSWVKSTWMGTYLVAKPEDASGIGTLMRFRDRLSE  
RISENNENDKDRERVDLLQTFLDARDGSGEPLDIAWIKAEILLVLIAGADTTGTAFQGLMCMV LNDP  
AIYSKLMDEIDGATRAGHLSAMPQFDEVTQHCPYYVACIKETLRVWPSAPADFPRLVGKGGMDLF  
GKFAPEGTEIACNSWVVQRDSNIYGEDAMEFCPERWLDKEEIVTEYTRYNMSFGYGSRICLGMNVA  
LIELYKGPLQLLRTFRPQLLKEKPAKFVVLGGVAHWEDLWLKIENRAGVV\*

>CYP6259B2|8703|Clagr3

MAHLSGLTGALIVVYILSILCRRSSQHRLRFYKAARQHGCCKPARRYPNWDPFLGTDLFVRFRKADYR  
GNRSQAFVELHKRYGRTIEMKAFGPAYILTTEPLNIQAIAATKFNDFGVGPRRGNVGAPFLERGVFT  
EDGDFWKHSRALIRPTFSRNEIADLGNFERHVG RFLAQIPRDSRTFDLQPLAKRLFLDTSTEF LFGQS  
VESLLPQTPFDAAQFMKAFDYSLLGLALRLMAGPLRFLFALDPTWKKAYTKVHDFVDKNVAIALD  
RQRSLVETGKPANNGGHRRYILLHQMAMETQDPYDLRSQILNVFFPARDTAAIAFSNIMFY LARYP  
QVWADLRKEVLQIGSQDLTFELLKTLETTRAVINETLRLRMPASRVVRTALRDTILPAGGSDGRSP  
LFVPEGQNVEMDLYSLQRDPDIWGPDAEQFRPERWTKGRPLWEANWQYEPFLGGLRMC PAQNQ  
VITQLSYLLVRVAQNFAQVKNRDSVWEYEENIKMTIESRNGVKIALVPM\*

>CYP6677A2|8830|Clagr3

MNWTIALASILVAFLGWTTVSIISNYIAARKVGLPLVISPVYPMNPFWIITYKLFPIILLKLNLPFGLGT  
WARCTYIGWQFHEKHDLHDELGPMFLIVTPGGNEVVVADAQVAHTVLSQRKEFIKPPIMYDQLN  
VFGPNLDTVEGEDWQRHRRLTAPSFNERTSSLVWDEAIRQTKEMAPSWTDQGRMG TSETVPDTAT  
IALHVLTSVGFGHSYPFHGGVRDVPAGHAMTYKDALALCLGNIITFSIFS RKTLSRSWLPKKLRALG  
VAAKEFQTYMEEMLSYQRAGVEERENESPNLMSALVRASEEAQKTEDESGSRRVGLSDDEIFGNIFI  
YNLAGHESTANTIAASLVLLAAHPECQEWLAEEIHQVLGIAKATEGWKYEVVYPKLQRCLAVMYE  
TLRLYGSIVFIPKSTSFHSQTLTLKDRTHVLPPDTFVIINVEGLHTDPKIWGPDALVWRPSRWLRPAQ  
SEKTTNPRMTPESFIEPDGAFIPWADGPRSCVGRKFSQVEFVAVIATLFSQYRVRPVL RPGESEADG  
QRELQSMVDNSAISAITLQMREPKKRALRWEKRTLNG\*

>CYP611C1|8987|Clagr3

MHLIPFLAVAIFLALLYAFSRFQESKHDPKEPPFLPQKIPFIGHIIGMIQKKTRYVYVHLRQRYAAPIYSL  
LMPQGSKIYVVTSTD LISA VQRQPRILSFPPIGVKFAMSLSGSSASANKIATNNINGDEGDWGLSMD F  
NKA IYPALSPGPHLEAMNRIMIPHIAESLDKLRMGEEGRRRRIVLGRWIRHEL SRAITDSVYGPQN  
PFKDRAVEDAFWDYENELFRIMMNLPSLTARKGMRGRKLLGSAFLKYFQNGGLKDASVFAQNR F  
DSWNNHELALEDIARFEVVTLIGTLTSTIRTVTWMLYHIYSTPSILAE LREEIPAVMSTSTTPQGV PFRS  
LDITRLRANCPILGSTFQEVLRCHALGTAVRQVMRDTLLENKYLLKKDSMVLMP SVVLHTDPNLW  
GPDVGA FNHKRFLRQGPSTSKSGNYKTPSPSAFRGFGGGTTLCPGRHFATTTTMAVTIMFLMRYDV  
VPVEGRWP KMTGEKTGVVSAVEQPDHEVEVDVKARKGFEEGEWSFRMDNSDTVFAMAVEDFE\*

>CYP6406B1|8989|Clagr3

MVEATANWQHVPYMLYDELR YALGPENVTTKVRQWQASTPNPPILQLASQGHWGMMMLGASLLP  
TFLLT YVTTLRSSIAIKRQKVGRQPPIMPYWIPIFIGNLIPYIWDTS GFCTKTTKYGYSMPIRV RIGPLK  
LYLVSGADHYLALFSSKASRCMNTKAAVLLALENLFGTPSNVLPFYAADNSGVNSTPVPWSRVKPE

HRITYLQTRAAHKYLSGPGLAHMTEFYLNVL RQGFQRSQIGSEWIDHPDLYKFLQDTV FRAAVEA  
MCGQHLLAQSPTFVDDFWFVDSVPILIKGLPRWLSRPYRVRGRLLGAIKRWHNLAHEKSDSSKI  
GADDPEDWDPYFGSKLIRARQEYSRNPSPSLNAEALAAEDLGLLFATNTNAIPSLTWFIYEICRDNDDL  
ARVEKDVEACRTRSSSTDEMSLDIDKLC SQPLLQSIYAETLRLRVALFVTRTPENESFSLGDWKLPPN  
ETIVLSSRTGAMNPDVWNAGTPINPHPLDTFWADRFLIYPNDPLSGPSRKDLISFDENHGGSTTEER  
PLETEPRFSLEGVAGGWIPYGGGQRMCPGRHFAKQEIIIGTLALLLTHYEIELREPTKGAPECNMRFF  
PFGGLPPTKEIPFRMRRRNl\*

>CYP51F19|8991|Clagr3

MDVFIGERLGLSKFALAMSAITLLFTFFILMNGLKQALFKKRNEPPVVFWHLPFVGSALS YGQEPNK  
FLGECKAKYGDIFTFILFGRKITAYLGTTGNNFILNGKQVDLNPEEVYNVITAPVWGS DVVYDAPH  
AKYMEQKRFIKFGLTSTALRSYVPLIEDELYSYFKRTPAFQGSAGIVDIPHTMAEIIIFTASRSLQ GNEV  
RKKLDSSFAENYHDLDMGFTPINFLFPGLPLSRNRKRDI AQQRMANTYMEIIRARRENPYAEKSED  
MIWNLMRCTYKNGHPLPDKEIAHLMIALLMAGQASSAVTSAWIMLHLAAEPSIAAE LYLEQIRVL  
GSVNKPLCLDDVQKLPLHADVVRET LRLHPPVNGVMRKVKRPMPIDGTD MYIPASNILLAAIGHIG  
RSAEHYVHPERWDPHRWDTPNPMDDENKSVKVDYGYGLVSASATTPYLPFGAGRHR CIGEQTFTY  
LQMVTIVAIMVREFEFNRNLEGQKGIVATDFSSMVARPMAPAKIRWQRRSKVATDFTDRIHTGPT\*

>CYP6760B1|8996|Clagr3

MIVEIWQFLQHVGSDKNGNIDYLRLTIPTLALGWLSWRIWAFTVKPTFQPREPRELPYWIPSH AISFF  
KDTEGTITRARLYFGDSREPF AITLAGGKLYIVTAPQDVTEIYKNTKT LTFDEYVRDVMK SIGVSDDGI  
AKLYKPPGEIGDGR LHKALAHAGEDYYREQLLPGAQLDILWEHVLSDIASSIRWDNLPGSRFNRAE  
NSKTL SLEWTS DVLKSVIRAFFGDRLLQMDPQLLQNF AAFDKESWKLYKLP RGVAKDTYDAM  
DKMVR SVEAYLQLPQNQRSEATWLIK KLEVEAGKANIDVHDLAAMITSLVWVILSNAYKLCFWIIA  
YLLYDPSLYAVIKAEVTVAVRDGLPGL ETKLEECPRLA AVYDEVLRLTASSASIRTVESDTPLRNVVL  
SAGGKVLMPFRQLHFNKEVFGSNVDEFDAERFLRDKSLGKSSSFRPFGGGATYCPGRYVAKREVMV  
FIALAMSRFDDIRLAEKEQS AFPKLDTRTPSLGIMMPMAGEDVQVVL CILENQDRKYFGYSDETYKL  
TFPGQELYLMTSPGDISLIYRNTVELTFDTFVRQTLRALGASSHAVDKWIPLHLSKEGMAHTSSSSTP  
HAGEFTHIGERLCQQQLLP GKQLDILQRIFIDGIHESLQWQSVTQKITIRSSPDIKTISLLGWCREVLL  
QSATRAFFGDRLLKIDPDLFQAFFMFDASSWKLHYGYPRVFSKELYCARD AII EALTAYFKLPRSERS  
GAAVLVDSLEAEMRNLDIEDKDIAALIMPVYVWINANAYKQCFWMMAYILYDQRL LSTLRDEISP  
AISENSPGLEYRLEQGCPR LRAVYHEVLRLTASSSTVRGIQCATEIGDKVLGAGANILIPYRQLHLNP  
EIFGSNADQFDPERFLRNSNLSKNSSFRPFGGGRTYCPGRYLAEREILTFVALALHRFDIRITASKSHD  
DEKARNVIPGFPRIDNKKFCLGIMEPIKGDDLILDITRRG\*

>CYP6389B1|8997|Clagr3

MTIATQSDLQH LFGQPSALGGLFVVLWLIWRMKVILQKESHASITGLWSWITDV KYLFYYADYLQA  
NYVSGVPYTLTSSNTFVHISSSAQVEELGEVPEGT LSLVALAEDVSLEHSVFGFGMTSFPQMLQPKY  
TMDGLEVL EDSVTGMSIQYRVLR TLLTANLPSLQYGLQQKISKSFEDEVSSNSPSPDCWSMLRTFPM  
AKNVVVRTATSFAFFGEELSNDPVFLDAALLYPESVFKA AEAVRYVPKFLAPT VVSWITENHRASRTL  
VDKLT PVIEERTGCRQLRDLPSLKPNDCLQWIIDASPRKDPWPTSKLIQIALG SWWASIHQLSMTLT  
NALYDLCEHSEYIDILRNELGQCTMEGRPTDLPLMDSFLKESARLHPADTVSMRRKALSPYTFKDGL  
HIPAGSWVCAPSRALMRDSAHYTDPATFDGFRFVDKTTMHNPA GPIASISKYTDTEPKFLFWSHGR  
RACPGRFYASHVLKMLRLRHILLHYDVKFADKA EPRSF AWRATIVPRENTRLLVRRREAEDLQA\*

>CYP548BF1|9839|Clagr3

MTVALYLGVLATLNPVAIIACIGTLVSVALVITYRLTLHPLAKYPG PLLGRLTDWYSVWYIWSGDRH  
INFYQIHQKYGDVVRYGPNRISINTAAGLREIYGSKANTQKSSAFYNVFAHFFHSDSTLTIVDRAVH  
GRKRRVMSQALS GNMVKAMEDHILKHVNIFCKCMIGQTGGSETKATSGWSPARNMTTWSSRLTF  
DVMGDVAFGRTFEMLISETNRYILDILPDGVHGLNLVGHMPGLLKLQLDKILFRKLT DGT RQYEAF  
SKAQSDARIKEGTSYKTRDIFASLLEFKDPETGEAFTLPELVSESSLIVAGSDTLATAITSAFFYLLHY P  
ETLTKLNAEVRSTFSNV DQICVGPQLTSCHYLRAILDESMRLSPGVGGVLPREVLPGGLHVEGHDFP  
EGTVVATCHYSIHHNEAYYPDPFTFKPSRWITSDNDTTPSSVELAKSAFCPFSIGPRGCIGKAMAY  
AEMSILLARVIWLYDMRLKEGSTLGEGSPALGTGRTRCDEFQLYDKFVSMTDGPLVEFKVRKM\*

>CYP65FG1|9921|Clagr3



MSASGGS AHTISLNGFTVAGITMTL GWSQRILTVAVGAFCVKFFLTVIYNLYFHLPLRNFP GPKLAA  
ATPIPFAWHLLTGRMV AWHKAMHAKYGMVVRNHPDELSFIGASGWGDIYAARPALPKPITGT LQ  
TPSGVPSLIFIPDPQTHGRQRKILNPAFSEHALREQEYILQKYGDLLISRLREQGDEVNII EWYNYTTF  
DVTGDLCFADSFRCLEAGDNHPWVA AVYRGVKFGQILTVFDHFPPLGAIVKWCIPPSIQEKAQEN  
HIYTRKKIDQRIASKSDRPDFMKYILENNREGGMTREDINSTV SLLVL AGSETSATTLTSATYYSLNH  
PRVFERLKKEIRDAFDHDPSSITVSAVSELPYLNAVITEALRLHPTNPVSIPRQVDRPVEICGIMVPPG  
VRAGMSGLATFTSPMNFVEPMSYIPERWLKDADPRFAQDKKDAFAPFLVGPRNCIGKPLAWAEM  
KLILAKVILNFDLEISSKNIGAWDDTRVWLLHEKKPFYVKIHSRTQRKK\*

>CYP6171A1|10074|Clagr3

MGILSLVFSLFGILFAYASYRGIYNRYFHPLRHFP GPFWASVSDFFKLWV VHTKQIHTL GLEAHRKY  
GPIIRVAPNLLTFNDPELLPTVYHRRVDKTD MYTVGALGD LAPPFQTMKHDEHA AKRKRIASSVSR  
HIPTKERCTLPVPLIPQKFTLTNLKRLESQVDDGIQEWLGALKKR FADTGEKMDYARWSQYVQTGS  
EHIKYLIFHSYFVHDMMTQLSFGEPIGHVKQGRDVDNLINNFHQMT PFAGFIAALPWVVKPLWES  
RIGKRLFMPKPGDNTGTGKIMAYDRLLLEERLNHPKSHHKGDFLDNILASKNEDGSPISIEEVKVEG  
FVLLVAASDTMASFFAGFMRYIVETPGVYEKMMTEIDDFDRKGLLSTPVPTFDEVREMPYFVACFRE  
TLRLYPSTPFIIPRYVSEGGFTLHGKYVPAGAEIGANPYITNRDKNIFGEDADSF RPGRWLENAERER  
EMERYFFSWGYGSRGCLGKNIAKLESYKTMVQFFRTFKPSFCDVERVWRQENLAIFVHWDMMWMI  
ENRGVHPENQKL\*

>CYP532W1|10380|Clagr3

MLPTNVRSSVPVEAWIISLVALAIARLLFYRFKKGF AKYNGPFLASFTDLWRVFHTYTHMNQPPML  
DIHQKYGDIVRIGPNTISFGKPEAIKDIYGPGKTWNKSGFY PVQA AVVRGESAITLFSSADIPWHNAL  
RRAINPYFTATAAVSYEPLIEKTINVFLAQLDSRFSGKKGPEGI IKLEDWLLYFSFDVIGELTYGSRHGF  
LESGYDSQGFI AFLQGF AVYGSVMGSPSPFWDRFLRHNPLLLWLERKGYTGTSTSF GPFVEKRMKER  
IMQQKNTKNLETKESEDLLDKFLKARETHPKAVSEKEVMSLSLTMVLAGAETISITLTALFYLLKN  
PSCYTKLQHELD TQLPPRDPSSLKCDVDYTQAQKLPYLHACIQESFRMHPASAVLLERVVPPTGADI  
AGEHMAGGT VVGVS SWAVHHNKDVFGQDVDFKFRPERWLEPSEAQVRLMERSMLHFGAGNHLCL  
LGKNISAIEMYKVVP SLMRTFKIELVDPEKDWKIIT TIFTRQEDVDVRIERR\*

>CYP51F1|10426|Clagr3

MGVLA FVLEPLRVL SNRSTVLA CLAGLFSLIAFAIILNVLNQLIFKNPN EPPLVFHWVPFFGSTVSYGI  
DPYKFFFSRQKYGDVFTFILLGKKT TVCLGVKGNDFILNGKHKDLNAEEIYSPLTTPVFGKD VVYD  
CPNSKLM EQKKLVKFGLTSDALRSYVPLISQEVEDFIARSSVFRGSRGT FNVPGVMAEMTIY TASRSL  
QGKEVRSKFDSSFADLYHDLDMGFSPINFMLPWAPLPHNRKR DYAQNKMAQTYMEI IKARREGGS  
QRDADDMIWNLMSSVYKDGT PVPDNEVAHMMIALLMAGQHSSSSTVAWILLRLATRPEIMDELY  
EEQKSVLGEDLPPLTYDSLQRLPLNAQVVRET LRIHAPIHSILRKVTTPMTIEGTPYTIPTSHVLLSAPG  
VTSKSEAHFPEPDLWEPHRWDQGSPLHGTNQEVD DDEKVDYGYGLVSKGAGSPYLPFGAGRHC I  
GEAFAYVQLGTITAMMVRHFRLRNLEGKQGT VETDYSSLFSRPLSPAVVQWERRDRATKA\*

>CYP5328L1|10580|Clagr3

MIHISAYAYGVA AVIGVL SHVLYFRRGEHHKETLPYLQLFAASIPISALALAHFLHFSYAQAILCATC  
IVGSFVGGIWTSMITYRAFFHPLNKFPGPWSLKISKFSQLVSSWRLDAFRKSYRQH QKYGNFVRTGP  
NEVSIASPSAATVILGPKSQCHRSPWYEYAIYQDLESLHSTRDYAVHEARRRVWDRGFSIKALRDYE  
GRVTQYTYDLM SKFALFAGKPIDASAWFNYYSF DVMGDAFGKSFNMLQTGSYHYAITWLDSSMT  
LLGRFTPIAWAIPVGAIAPIIGATFRRFIRFCNAQLDERRVAGSKVPDITSWLLKAAPDVNDLEATK  
WLHGDSRLIIVAGSDTVAIALTHLFYLLAINPAQVDKLRKALDPLMRGDEPFTVRNVQNAKHLNA  
VIHETLRMHPPVPSGVFRTTPPQGITVDGTFIPGGVNLIVPFYTIGRSEECFAFPNEFIPERWYDQPD L  
VKVKDAYAPFSLGPYGCIGKQLALMELRTVVSLLVSQFDIRLAEGEDGSKLLEESRDAFTLRMEALE  
VVFEERGKKMMTKATMYGVIVLGIKPSTA AVTDDAKNWT FILKYDDECD DKTQSSNQYT\*

>CYP6272B1|10772|Clagr3

MTSQPRLPVLPYGSPTT LSGFSETFSFHASPEAFITSRVLAFQASNASLADSRTPIRAKVLNRNIAVVSS  
YDHVQQLLCNEANTSRLSAGKAYDDL MAPFFPPNLLLADGPSHQPMKNPWVSRMASLP AEIQSL  
VQETVLLHFRGIPSESTIDLYESMKALS WKLILSIFIPSSDERGQAQKDA AEIESLQEDLLRGQSIFPVS  
ISTPLWRSPKAKGLTARKKLQSL LKARVQKGKKGCPFATIDSAAEDDIANHLLLTSSLAVKSLASFL

TAVMLNLYVYRDEASSQQATSLASRILNSEIPSSREELLKSTILETERLSPPVVGIMRRITQDITLSAQER  
FPDILIPQGWDIWLYFVGAARDPAVFGKTADSFLPGRYNTADGVEHPRPGFAFGAGSKSCLGETL  
MREVVTTVAKTCLGMEGGSKGGVVLEASMEDVPRGVQGWLGWQKDVKPQEWARMKQLPTQR  
PIKGVMVKIVHDLST\*

>CYP59AE1|10971|Clagr3

MPPHHPIFGHLLVLARVMSKLPKDAHPHYLADQLRQAYPEMGPIFYLDAWPFITLTLVVASPATLA  
QITTEHVLPKFPAIKDFLYPLANGKDIVGMDGKEWKYWRSIFNPGFSASHLVTLVPEIVRETTVFCDL  
LRDHAMQQDIFQMKELTNDLAMDVIGKIVLDSNLDQCQHQSNPMVNALRRQMRWMAFGSEGPNP  
LQQYHPFRFPVHWYYTYQMNRYISPEVDMRFEMFRNAPRSEDKSSSIVRNKSVIDLALIAYLKQNL  
NISSSSGIDPLFKDIAINQMKLFLFSGHDTTSSTVCYILYLLSIYPDVLSRVRAEHDDVFGPDPSQAAN  
KISEDAYLLNKLPTYTTATIKESMRLFPAASTIRRGEPSTITDPRNGLHYPADPSTLIWLASHACHHD  
PAFWPRANEFLPDRWLAKEGEELCPKPGAWRPFELGPRACIGKELSFELEKVLVSLVTRRFELTAAY  
KELDAAEEERDIEVDLRKKVRMAAVKSVDGERAYQVGKGEPsAFLPCRVRREVVTKF\*

>CYP559L1|11089|Clagr3

MDDFLQRLSTPAVAIPSLLLVIFSVYNRLTHVSNIPAGVPWIGKDTTKVFAGTRASLAGFNNVRKWL  
EDGYDKYKGNNLSYILPDSFCEPKVILPRSQLAWLTEQPDDILSASAFHHSLEGDYAFTSPLILKDP  
YHEHVIHKYLP RRVASLVPEMWEEVQVAIDQTWGMDTTEWKDVGVWQNM MRVIP SITNRMMV  
GRQVCRNEDFLENMGKFAMDVISCSYILRFTPRFLKPLLGPLVSIPNRRHWRNTTKYTLPIINERLA  
YFKRKQEDPSFHWDEPNDYISWHIKLAMAEGRHDELTPDMISRRLMPVNFAAIHTTALTITSAIFDL  
LSSPNSPGWLKGIREEA EKVLREEGGQWTKNGLARCHRSDSAIRESMRVNNFMALNVVRKVTPAE  
GIENKVGWRAPQGALLGVDMYSVQHDPEIYPDPNTYDPFRFSRPRETSDTLVHHSKVN GTGNTG  
LVATSDIFLPFSHGRHACPRFFVALEMKLILAYMVMNYDIEPLKNRPPNTWFGNLAFPSMKSTIKV  
RRKEGTTGD\*

>CYP6003D1|11283|Clagr3

MAGLLLGNASGQDTSTLGHEDGKYTGSDMDYTYGDAKQKMQTYNDDIRILLRKFP SHAVSLVSDF  
LKSGRLPGQTQEMMDIAGALPYNSPIRNKVQAMTVSTLFNSLEHPPKSYLGEKHQYRTADGSNHV  
STCDQDFQALNTHCVSFRIDLNLQNFMLPEFGKAGMPYAKTVRS AKKMHG VKPDPGVLFDDLQA  
RDEFHPNEAGISSMFLYHATILIHDLFNTNRQNSDISDTSSYLDLAPLYGSSQAEQDRVRLGKDGLL  
KPDTFHEDRLLGQPPGVNVLLVMYSRFHNYVATMLKEINEDDRFTPRPNTRVEDAMKPPRVPEKV  
VDNDIFQTARLIVGGLYISISLGDYLRAIQGVHEKETTWTFTDPRMYIDKTPQGEAVPRGMGNQVS AE  
FNLLYRFHPAISDHD AKWTERFMIEEARKRLGKSDDFNLEDLTPTELWTMLASFAREKAAIEPCKR  
DLEGLKRGTDGKFSDEALAEVLKRSIDDTAGAFGARNVPRAMKII EVAGIVQARKWEVASLNEFRT  
FFGLEPHATFKDVNADPEIQIALQNL YDSPMIEMYPGIFIEGVAQEK GKSKSGVGFPGTAGRGVLS  
DAVTLVRSDRFYTTDYTTATLTNWGLCEAQSDYKTLGGS MFHRL LQRGLPDFFDFNSVYAMQPMY  
TPAANKEIFQRLKVDDQYSLDPPKAPAVKTVIETHGAVCNALSNTKYFASIWSASVGTLVSKKASD  
GLDTLTELDQLAESKQLFSQYLIDKAESTVKRSSFRLRKSSYQIDIVRDVAIPLNARFLAELFGLSVKTS  
TNTSAFHTSSELYKLLIEVRNWVDYPNADPAARWYRRRKAQESAKVLTESTKSSLSKIIAKPWAFSS  
WFWASSEVENRTAKTTKDVGTIVAKSLHADGRNDEDA AQIAWMMAVEGAGSPVTAFAEVL DY  
FLSDAGNEHWPKIQKLAREN TSKADDKIADYFMEAHRLSSERICKRSVKSGKDSVKIGDHNLKPKQ  
EVLLRLSAANRDPTAFQAPNTFKLNRKSSVPAGNNLQNSILRVYCTALIKVAAQMDGLRKAPGQM  
GELKRVQLDEQGCKHTLGQAWGRHYMTADWAYMVQEPTSALRYVQRRGAGARGE EERVGGFF  
VAIECTNPKKL\*

>CYP6001C42|715|Clagr3

MLRRFSTKFGKSRKDG VNGVNETNGTSSNGVQTNGSYTNGAETNGTSIEKPASTKRGSSFGFTSKK  
PKTQASALNADHAASRAEVESAFAQFAQLIHASRQPLPDQQGHGVDP AQEEHSG LISDVKALGFK  
DVQTLMDVMKNKAKGDLQDDHTYLMEKTIQLVAKLP SHSKTRVDLTNAFIDELWNSLQHPPMSY  
LGSEFYQRSADGSGNNIMYPH LGAANTPYARSVPNTLT TGALPDPALIFDSVMARKEFKPHPNKV  
SSVFFYWASMIHDLFQTDHRDFNNSQTSSYLDLSTLYGDTQEDQNLIRTFKD GK LKADCFSEERLL  
GFPPGCGV MLIMLNRFHNYVVEQLALINENGRFTK PNEGLTHEMAEKSWAKYDNDLFQTGRLITC  
GLYINITLYDYLR TIVNLNRTNTTWTLDPRAEMGR LFGKNGTPAGVGNQVSAEFNLAYRWHSCISD  
RDDKWTQALYKRLFGKEAKDVSMQELLIGLSKWEKSLPRDPQQRPFADLKRGP DGKFNDDELVEI

LASSVEDCAGAFGPNNIPTCLKAITILGMQQARAWNLGSLNEFRKFFQLKPHESWEDICPSDPDAA  
EQLKNLYEHPDYVEMYPGMVSESAKVMPVPGVGIAPTFIISRAVLSDAVALVRGDRFYTIDYNPRNL  
TAWGYSEVQYDLGVQQGCVFYKLCMRAFPNHFKEANSVYAHYPM TIPSEN RKILRSLGREDQYTWE  
RPARMPQRVEFTSYKAAKYILENAKEFNVPWTEPFGYLMPOGGLDFMLAGDTPFHAKQRKLMGE  
AIYRDKWHQQIKSFYEYITQKLLVEKSCKIAGINQVDITRDVGNLANVHFAANVFSLPLKTEDHPRG  
IYTEEEMYMVLAIYASVFFNLDPSKSFPLRLAAKAVTQQLGKTVESNVKMVNATGLIAGIVDGMQ  
HNHSP LQDYGVHVMVRRLL ESGMGVSEITWSQIVPTAGAMVANQAQVFTQMLDY YLSDEGKMHL  
PTINILAKTEGPEADDKLLHYAMEGIRLNGTFGSLRQSTVSTTIDDNGRPVTVKPGDKVFTNFVSAS  
REAEFFPEPNTVKIDRPLENIHYGLGPHACLGEASRVALTAMLRVVGRLDNLRRAPGAQQGLK  
KIPQPGGLYVYMRADHGSYWPFPPTMKINWDGDLPPFKKM\*

>CYP578AB2|1910|Clagr3

MFFLTIAVIFYVYLYKYLIYPSFLSPLSKIPNAHFSSSFPIWILWKRYKEEENNTIHAHSHKHGNIVR  
LGPNEVSIACVDEGIRTIYSGGFEKWDWYPNQFSNYGVPMFMSMVNSKPHSIRKRMISNVYSKSYIQ  
SSPEVDQISRTMIFSRLPLLEEASVKRQPLEVLELNFSSMTDFIIFGLQNGSNFLQDIPSRQHWLS  
VYQSRRPYRFWAGELPGVVTFKKLGIHIVPAWVEDANRELEDWTLEKCTAAASSISLESKESSNPIH  
PSSTATEPIVYTQLHTPLALSTPPPTPNLLPFLIATELHDHLAAGHETSGITLTYLMHELSLHPTIQSA  
LRTELRLSPPLIYPSASSTDHDLPSRPDIDTLP LLHACL TETLRLHAAIPGPQPRITPSTPTSLAGSPPLP  
AGVRVSAQAYTLHRNAAVFPEPEVWKPERWLNAGEEKEREMARWFWTFGSGGRMCIGRHFVQ  
EMKLIIAAIYTNFSTHVVDDEGIEQEDAYTAAPRGNKLM LRFERVE\*

>CYP682BG1|2763|Clagr3

MLGVIQYSILTIFWLPAAAAALYGAGLAIYRLFSLAKFPGPKLAAALTRKYESYYEAYQNYEYYWKI  
KELHKQYGPVIRVNPHELHIDDKDFYKLN SFQGAWN KDPYTAHQFANPGSIVGTIDHDIHRKRR  
AAIMPFFSKQKIYALESVIQGMVDKLCYRIEYGKTGPVNLRNASKCFAADVGEYCF AESGGLID  
KPDFAIEEMNQQQQGLKAGLRARYLPSWWMPVVRGAPAWIRASIDPAAKHFEVWHRAVEGPVG  
RMEKRKNDEFYEKAGHRTIFHELINSPHLPPEEKGTGRII QEAGAMVGAGGESTSQVITAFVYCLLA  
NPQVLSRLREELRSVIPNADSPAPTLRQLEALPYLTGCVKEALRLRTGKIARHQVRPRDRPLYFNEW  
EIPAGTICSMTPIFLQIDPEVYPNPHAFMPERWLNLD EQQRQRLEHNLVPYSKGTRGCAGLTLANA  
ELYMLIPALVTRFDLELFDSDAWDTEMAVD SHHHSRPD SKGVKV FVKKSTF\*

>CYP51203A1|3091|Clagr3

MESRLIVELLVFVGLVFFGSFLRRWLYSVESETHLPWVGIGGGRFKKL RASVRQISDSLETLSYGYTM  
YGKYGQPFVMPDPSLQPQVMLPQEHISWLIRQSDGVMSQGQVRRERNALAYLHMDVDYKATMA  
LIDKIINPCLQRKLN RVQGNVFDEIRASVDDTFGLDDNSWHELKLHESLQTIINRTGTRAFFGLPICR  
NQDYLYSLKRFILAMGAGTLIVGQLPLWLVRPLAASLINIPLRYKAKALKTLLPIFAERVQSFERHE  
AGYTIEDEPEDFATQTIQLVTHAKDGTYNRSFGYLAEQHLLLSFAALSSTAAAATNLLLDILSSAPEV  
DAYNILRSEAAALTFTTEQAWGDPASLQKLTCTDSAIREGLRRNALQIRGLLREVM PKNGITLPDGTH  
ISRGTWVGIPLQAVHMDERFYAKPEMFDPFRFARMRTDPALEGERFDATQTS DKFLAFSYGRHACP  
GRWLVSQILKLLIAYITLHYDIQPLEKRPLNTVFGDTNIPNV SATIRVRRRKFA\*

>CYP5105E2|4317|Clagr3

MPSWTNIVIGFITLQLAYTIYTVITRIFLSPLRHIPGPKLAAALTSWYEFYFDAIQQGKFVWKIKELHISKY  
GPIVRITPWEVHVNDVEFLDDIYAASFRRREKYAYQTRTLPVPLSVGGS LQYELHRKRREALNPFFSK  
RSVVELGPMISQKADLLCKQFENHLSSQIPINLSEVYYAFSNDVVLQYSFGHDDDLLGNPVRAATLR  
AHLSELLLGVKFNQHFPWIVNTLELLPMALAKHIMPPGVLD MKEFSTKIS EIEQVLHDHDDTKRG  
GKRSIFYELRDNP TLPPSEKSSLRLEHEGTLLVMAGTESTAKSMAITHFHLISNPAIMAKVRAELRTV  
REDASWTELEQLPYLSACIAEGNRLSFGVTARVCRIAPDEPLQYKSYTIPPGTPVSMVTLCAHTDEHI  
FPDPWTFNPDRLWGPQGAARRKYQMAFNKGGRNCIGINLAHAELFLVIAAVARYDLELFETDISD  
VEFQHDYHVAYPKLDSKGIRAVVKRKIAMD\*

>CYP5042B6|4615|Clagr3

MYSIESSYPYLGFFFLCSCVALVQFLKPTDVKRSGGRKRWAMPPGPPGLPVLGNLRQMMQARR  
GGALSFN EWLSSLIPY GEMVTLHMG SQTWIVLNSDRVVSELIAKRGKITNERPQMPIASGLVSNCKR  
TVIRQEEEWREGRRVMHQLLSG SNLKVYAGMQELESVDMLRRYVREPDLWFSNNFRYATSVLYRV  
VMGYPLNKTKAALDDYQ RVTIEFVTTINSSYVDFFPSLSKLP HLLQPWRHYWAQMGSFHRRVLQQ

WWDPIRAAVSKGSAPPSFVRDVLHPDTRYSGDDEEAMYLATSVMAAGGDNTRMTINTFIMAMIT  
HPEAQVRARQEIDRVCTSGGSLRLPQMSDLLEMPYVAAMIKETLRWRPTVPLIPPHQVTENLEFDG  
YFIPTGTVFLINSIALSSEFANAHEMFQPERWIDSSEARTTNFWGFGGGRICVGVKVAEQALFIAP  
ARLLYCFELSPRGPIDSERLNHRTLDEFPVKATVRSAYALLIEEEASKYEASF5KFRLTAK\*

>CYP5134G1|4621|Clagr3

MDSNTSASHTTALLAGLLVTLGVLLYRAALPKPIPGIPCAQYSINRLFGDVPDALKYHAKTSETVAF  
LASRCEELKSPIVQVFVRPFARPWVVLADSRQSDIMVRRRTREFDRSGFHSDDLGA VVPNPFQMTSA  
EDELTLMKVVMRTNDQWRHNRRLVNDAMSPRFLSNIAQQVYNQALNLVELWRQKMRLSKGH  
AFNLRADLQLCTADSIWATTFGDDIAACKVQSDYLRTLDSIKLLEDEEALAQFPAKPNPDAYAAW  
KAISESGEIPMNSPLGRHHHWFVAVTFYPYLRRAISLKNIVKNKVQKAWGKAKIDNASESNAIDSIV  
DLVVDREFALAKKEGRVSEHDSKFVYDELAGFMIAGVDPTATNMGWGLKYLAKHNDVQTRLRK  
DLREAFPSALQEGKPPSANDINKARIPYLDAFIDEVLRHSGGQPTNVRVAISDTEILGYHIPKGTDIFL  
LVNIPHKPLSSIPSPSYVLTMGPSYKSPALPIDESIRSPSSREFKKDSEKWAHEDLG5FNPDRLIRNEQ  
GEIDFDSRAAPMQAFGAGMRACYGRKLAYLEMRIYALVIWNLEVLPLPGALFDFKAIDKLSHQPP  
NVYMRFDVPK\*

>CYP682AW1|4961|Clagr3

MDKMTMAEILAVLFLFYIFGLYIYRMFFDQLSHIPGPKLAAASLWYEFYDVIKKGQYTFEIGRMHE  
KYGPVIRISPYEIHINDPEFIDEVYPGSSPRSMKYQWSQKMFQISAFLVTESHELHRIRRNALAHYFS  
KQSLRDLEPGVQSQVDKLVSRQLGLKGTGTAINLLDVYACLTGDIIGQYAFAPKYGFLDDPDFSPY  
WHQIMVEVSQNGHILKQFGWMLPLMQSMPEWMVKKTNPLMMTLINFQKVQRFNRNQVIEVKESI  
ARGEKPTGQTTIFYDVLTPNPNVRPEEKTTHLQDEAQTIVIGAGTVTTAHILSTLYHLISNPSILQTL  
QSELSPLMSSTANHPKWSQLEALPYLSAVIQEGLRIGYGVSHRLQRLFPDKSLQYKSY5SIPPLTPVSM7  
AVFVHDHPSLFPNPRTFNPDRFLKNPGLKKYIMSF5SKGSRQCAGLNLAYAELYLALVAVFAPGRFE  
WELYETDITDVELKHDFLNTSPRLDSKGIRAVVN\*

>CYP51195A1|5450|Clagr3

MNFFDNYDGLVSHGRAYFDDDAFPAISFPGRTYNVVVKPEDIADVKNSTSLSWDYLLKELLSFG  
VSKSALGKDLRNPNGTHQNGHTKQPNGIKFEHKLLVNWTEPLYRQQFPPGLRYQKLSDAMLRLVD  
DALQWKKLPSRYTVNQERIPLMDFCGDILIQATTRSLLGDLIYEIEPKFTPMIDFNEEAWKLLMFP  
YPQIVAPRLHNAKKGIHKALCKYVQSSPDSQTQLAWVIDEILEAKEAAKLGDTDKASMIHTLLWIV  
NINAYRLSFWILSYVLFDPNLLANIRDEIKPAFGSNTVDFSYILERCPLLMSVFNETLRLTYGSVSVRR  
VMAPTMI5GKTLQSGTSLVIPRQLHYDDEAFGGDADEFDPQRFLKNDLDHSP5FLPFGERF5DAFPR  
PFI5AKREVLV5FVALVLKRFEFEVAGNSSEEKAKPSPPQIDSICQTLGIMQPVKGTEVYISLKEAA\*

>CYP6573B1|5774|Clagr3

MGIIAFTGYMPERCSDFVMIIALSVITAAALVLHRLLLSPLSSIPGPKFAAATR5WYEFYDCVLP5GKF  
FPRDREDAYIIWFAFFACTLVTSDIYSLFQGPIVIRISPNEVHINDPDYFSQLHSFASKLDKCGWYYNFA  
ASPTAGFSTASYDLHRIRRGALAKYFSMSNVARLEPLIQSCVTRLRSRLEEHRKEGTVVDLSSAYRCL  
ASDVIMEYALPHSRRLDSSDFAASYHRVVRNLGRIGLWNRQFPFIIPFFRAIPRWIIAKLDPGPALSL  
ADFQIVSSNNFFFSNNVLTQENSTKSLRDNAISITSSGCRIESIEAKATVLRELYQSDLPVSEKTIQRFVE  
EAQTLLVAGSETTGNTLTLTTFYLLADPERAGKLKQELAQVKKGQNSPLVYHDPHRLPYLTATITE  
GLRISSSVAGRLPRINPHAAMNYSDFVIPAGVAVSMSIRDVNLNERIFPDADHFIPERWLGDSEKRQ  
VLEKYMVAFGRGPRNCIGMNLALVEIYLVIGNMFRDYNMRLVETKEEDLKMTHDFFSPFGPINSKG  
LRIKVG\*

>CYP65FD1|5876|Clagr3

MHLIDNPGLVFLTTVIAVILYIAISALNNLYRHPLSRFP5GPRLW5AISRI5YVWVLIKGDLTQRTHELH  
QRYGPVVR5LAPNELSFIDGQAWYDIYDHHQGRPNFPKNPLWMA5PGDDGIHSILSANDADHARYR  
RLLSHAFSEKALRQQEQLLQSYIALLIQRLRTRASSAESAIIDMVQWLNFTTFDII5GDL5LGESFHCLD  
ESRYHPWLSILFTQFRIGSLFIALRFFGLAGYAKRLLPKSLLEKRKDHINMANERIRRRRAQ5GASVDG  
QRNDFMTFILRHND5KGMSDPEIEATLRLVL5AGSETTATALS5GI5GNLLGNSKAMKELTAEIRSSFR  
HTSEIWSERVSELPYLGAVIEEGLRLCTPV5ALGMPRVVPPG5AEVSGHWLPEGTFVSASGYASNR5SR  
LNFPNSPLNFVPSRWLSRTPSLDKPNPQTNNASPPSAFNP5FSLGPRRCLGRNLAYLEMRLILAH5LIW  
AFDFESA5E5E5SPWSWERQKSWILWEKTPLSVRIRCRE\*

>CYP65FS1|6484|Clagr3

MPQMNGLPQDIVGRCLFLGCGAVALYSCYQLITAIYNVWFHPLASFPGPRTAAATHIPYVRASVAG  
KLPHWMKKLHDQYESDVVRISPSELSFIGASAWHDIHGHHDHAQPFEKDPRVNGKSFNNVDNML  
TAKHEDHERMRKVFCFAFSERAIREQEPTVQMYIQKLIRRLHEQINNSTQGKVDLVKWYSWMTFD  
IIGDLTFQSSFKCLDNQANHRWIDMVVSSFETLVLMSGICDRFTISRIFLPYLIPKRYKKMIEDHWNAT  
EETLARRFESGTRRRDFMTPVLEDNVDGKGLSRHEILSNAWLFFVNAGSETTAGILSATIYYLARDRRI  
LSIITAEVRGKFSDECQMNAQSVAEPLYLLACLSETNRILPAALIGQAVLVPPQGATICGYWVPGNT  
GITNNQYACYRSKTNFKNPDDYVPERWLDDPGYASDQRKAFQPFSGYARNCIGKSLATMELRLAL  
ARTIWNFDVGFCEESDLNWDDQKVYMSWKKTPLIIKLAASPQARS\*

>CYP526AB2|7158|Clagr3

MAPWNPSMPLRSGLMTPTGVCLVVAFAVAGLYAIYQWLLPKPLPGITYNPEATKSLFGDAPDMIRE  
ISVTGEFGLWMAKQVEKMRSQVCFVRPFSKPWVLVADFRSQDILMRRTEFDKPTFLSDGLQALG  
DFHARYKTNFAFKARRQLKQDLMTPSFLKNFMGPFMHSGLELVKLETKMNLAKGRPFVSIADF  
DYAALDVMLNYGFGGNMVDLSALGPQLNLITQLDSSEIPDGDPEPVTFFPKAPISHFLEAVHDAPEV  
IEKTIIAWTPRLSHWWWKQQSWYKKIFSQKSRCPVPQITKALENYRAGEVKSALHEHLRREQVTAEK  
QGREPQFDSQSMVDEIFADLIAGHHTTSISMSWVTKFLTGYPHVQFKLRSALYSALAGAVAEKRFT  
FDELRRARIPYLEAVIEEMLRLTPFMSRRETTCDTEILGRMVPKGCQVFMVNSGPGYLSIPSIPVDDVQ  
RSPTSKAAKVRGSWDETKDLRIFEPERWLQKEDGDVEFDGAAGPQLGFGMGIRQCWGRKMGYL  
GIRTIMALVVWHFELKKIPESLGGYGGFDGMTRQPHRVFVRLGRAVS\*

>CYP52K11|8178|Clagr3

MLHPHYLLLLAAAILAILYCRRLVHDYQARQAHESEFAKHGCLPPPRIQNQRPWGLDRLEQIFRAD  
KESRLMEVFLFHFRTGNTVEQVFLGTPAFATIEPANLEALLSTKFKDFNFGKRRDVSYPFLFGDGIFT  
QEGAAWKRSRDLLRAPLQHKHYENLASSSPVFLFGESVHSLTATKAFANEQRFGEAFNKAQAVIAK  
RFRLPDLYWMIGGSEFRRACSVVHDFVDQLIDRNVFRGHGKSNVLLDEVAESTADRVALRGQILSL  
LVAGRDTTACLLTWTFLLLEKCDPANLTRRLREMGYLQNVLKETLRLYPSAPVNERKANKTTFL  
PTGGGPYRTAPVLIPKGATVAYSVYALHRRPDLYGMDAELFRPERWDEDMPVLHDKTNAAWGYL  
PFNGGPRSCLGQDFALTEAAYTVVRLQQFPPIRLPMRHKVELTGVEKQTMTLVISSTEGCMVEMAP  
\*

>CYP6001A25|8730|Clagr3

MPSAEALPNTTPPEQHVTFRREVATTFESVSGVIDAVTHPLPTQTGDGTIYIQUETKPAGVVSDDLTRMR  
PRDFKTLLDLAKTALSGDPLNDQDFLMEKLIKLAELSVTSKESGNLSNQLVQKLYDSLQHPAAT  
MGKEHRYRAADGSFNNPMAPMIGAANTPYARSVRPSQLQPVDREPEPGDLFDSLARGKDFKPHP  
AKLSSMMFYLASIIHDLFSTDHQSNNATSSYLELSPLYGNNQEQNHMRFTKDGKIKPDCFSNKR  
VLGFPPGVGVLLIMFNRFHNYVVEQLVAINESGRFTRPKEGASKEKLMAYDNDLFQTARLINCGLYI  
NCILKDYVRTILDNLRTGSDWDLDPRNAKLGTPTANGTPGNQVSAEFNLVYRWHACISERDTEWT  
KKEYERLFPGKEACEVSLPELLQGLGRWEQGLNEDPVKRPFADLTRAEDGSLDETALVKILTEGIED  
KAGAFGSRNVDPILRSVEILGIIQARSWNLASLNEFRSFFGLTKHETFESINSDPQVADTLRRLYDQPD  
FVELYPGLVVEETKPMVPGSGLCTNFTISRVLSDAVALVRGDRFYTVDFTPKSLTNWGFNEVSSD  
FTVDHGHVFKLFLRAFPTHFQPNVSYAHYPLVIPEENLSILHELQKDKYTWERPKYTPLPTLITTY  
AACKSTLANQEGFKVTWGEAIKFLMHNSGKEYGADFMLAGDSAPNANSRGVMCPALYRQDWEQ  
AVKDFYEHITLKLRLDKSYKIAGTNQVDIVRDVGNLAQAHFAAEVFCLPLKTEQNPHGVYSEGQLY  
SIMALVFTCIFYDADPAKSFPLRQAAQKLTQQLGEIMETLVIPELAHGIFGGVMERLHKQQSLLSLY  
GTHMLQKLSESGLGARDLIWSQILPTAGGMVANQGGQLFAQCLDFYLSDEAAPHLKEINRLAKLDT  
QEADDDLLRYFMEGSRIRATVGLYRKAETDTKIEDGGRTVHVKAGEKVLCDLVTACKDPKEFPEPE  
KVILDRPLDSYIHFGWGPHKCLGYGASKLALTMLKTVGKLDNLRRAPGTQGGQIKKVPVPGPGGLT  
MYMTTDQSSIFPPTTMKVRWDGDLPAVN\*

>CYP59AC1|8988|Clagr3

MSLASACSVTGTMSLKTGTPSWRLVLQACLMLLAIGLARFFVKLYRIRCKFQQMQKEGLPMPPHH  
PVFGHLQLVARIMSGLPKDVHGHVLPHQIGLLMPELGPIFYIDTWPFPPILAVAAPDPAYQITQLH  
SLPKFHALREYMRPMTGGNDLTTMEGKEWKTWRNIFNPGFSSGHLNTLVPEIMEDISTFCEILRDK  
AKKPDIVLMDPLTSNLSLDVICRVALNTRLAQRSTNDFVSSLRNQIKWLSFGNEANLFERYHPLRPI

MRWWNGRQMVRYVSRELDLRFNSNRKRSGLAKNGRSKTIIDLALDNYLAQQTHNGSSDAMDAT  
FRDFATSQRLRTFVFAGHDSTGSTICYAFHLLSTHSSVRLLIAEHNRLVLPDIDQASSRISQNPILGQ  
LRYTLAVVKETLRMYPPASSTRSGVPSHSIQGLNGRQLPTDGLVWSNSYAIHHAHEYWPEPHKFT  
PERWLVEEGDSLYPEPKGAYRPFEGPRNCIGQELAVLEIRLVLTMTAREFEIKSVYNEWDSLHPTNG  
PKTVNGDRAYQILSGAAHPDGLPCRISLAVD\*

>CYP6352A1|9014|Clagr3

MGWITSIVSASSLKLLPWLAFCIAIVIGFFHSAYVALAGPLSDIPAIHWLARWSRYYNLYMKYFYGTR  
TTHYEAHLGTDKNSSVHPPIRVGPSEVSIMSTEGVKTVWGAGFERSPWYAVFSNFGKPNMFSSASSR  
DHSSRKRIFASSYSKTSVTGDRVQNIKSRVAKIMNFLERQSSNSTFHGSSGPIVVRNVFRALQADV  
TAFAFSEGEGETSFLNHNLENGPNTVEDLGMGMMMDLFHDEKRDEFFFWESERPFGYISKFLARNGPKS  
HERAERWLMELVKPHEARLQSRNPIKSTDKSLLQFNGGVYEKLMFYKNPETGNPLDWTERASEIM  
DHAVAGQDAVPAALEFIIRQISTHPHVQAKLRLELLTSLPLSAEDRSFAMIDTSLYNVIMEGLRLV  
DTVSSYQTRVVPRGGCVVCGHYLPAGTIVAAQPYLINRQPDVFPNPETFDPSRWLLPREDYRNLA  
SMWTYSSGPRSCVGRELSLAIKIVVADTYTRYKTLLDVDRTERRPWEGADSMAEVQFENTLPCED  
GEWIENRVRKPSLFPVEAHEQVQEPVRRSSIFQPSDDNRALCEDKMQQTVGSPPERQRPTHIQFNLN  
SFTKSNETPNADISFQKPAHEGEQKDNFNFSQAIPSHQNLDAQAWLAQHYGPRKTSLVPSLLPLPL  
GAQQQKGGEQREDISRRPSVMHMYEADEDIAALTKPTEKVSRRPKRPGGLGRMRTAPERVDGILQGN  
\*

>CYP5391D1|9060|Clagr3

MDQTYAPSLLLAICGIAAVFLLSNVVTHRKPYPNPVPPIFLGNVGTLRKLSAKLDPQLLQLKKDW  
GSLCMLWYGRSPVIIINSRAARELLNERGAINSSRPEQNEFRKKLWPWRLVSTPMNADFRFLRRLY  
HNLLSAEQALLFRKYQDFESTIMLQNLQTPENFLRSAERYTMSVIFSAYVGVRLDRLDHPILVELN  
GLLDATMKYFEPGTLIDFLPWLYLPTALQPWHRRVLPLVDRESALHAAFLETLRKAVEQGTAPD  
CFCKQLIEVQQRESLSDTKAVHILAMLIGAGADTTGTILQGFFKIMALHQAQVREAEQELDRVGP  
NRMPTWDDKSLPGIRSLIKEVHRYAPIGSLGIPHCSTAPLYTDTHHIPAKTILFPNLTALSKDPDRYP  
DPEVFNPHRFHNDHTTAAASALSKDHMQRDHFHYGFGRRVCPGVHVAEASLFIVSVRLWGF  
GPKGECPLDMDAKTAILINKPKPYEVEIVCRGEAYRKVIEESASRGVATGILDLDVVPAGA\*

>CYP567E10|9343|Clagr3

MPSIHLVPEHGLMIDFTVARLALTALLCSSIYWAYATWRKASTHPLSRFGPFTASLSNFTHCRRFM  
GGRQPYEILKLHEKYGPVVRTAPNELSFNTAQSWRDIYGPRKGHELFKSEFYDGLNFATKVPISITTE  
RNPAKHTEMKYLGGAFSDRSLREQEYLVAEVVDQFIEMLDNSSGEEDGSGKELDLVNAFNLTTFD  
IIGSLAFGEFPFGVAFGKEHFWVSISSLRKLGALADGFKRFPWVSAAVQTLFSGFIKKMLEDKRKH  
EAYSMEVQRRIRQRTNRKDFMTRILLEREHQDISDAQIAAHARDFIAGSETTATALSCASYLLKD  
PRVLQLLQQEIRSAFKAYSEIDGTSTVPLKYLNAVALEALRIYPLPVPLPRVVPAGGDTVDGHFLPE  
GTVVSTNPFASMDSTNFHEPWEIFERWLGQSKEDELNASQPFSGMTRGCLGRSLAWMELRTILA  
KLHFSYDLALLGDGQDQDWDWQRESRMHLLWKKPKLMVKATRLRR\*

>CYP5070D6|9652|Clagr3

MAIKMEILPLLILSGGLAVGAQKFASMDALRVFGAAFGVSIFVYLAYWSYIFPFYISTLRKVPTVPGFP  
LWGQFFTITTEVGTNREWHKKHGPVRYFFPFGAERLSIADDDALNHMCIKNPYNYPKPDRAKQ  
WMVRVLGEGVLLAEGNPHKHQRKALSPGFSIQSIKALTPIFWRKALLLSKLWERDMLVAKTKSMTI  
EVLEWLNRTTLDIIGEAGFGTDLDSLEHPETPIREAYRLVFAFDIQSRVLHGLAAFIPLTKYLPKMN  
RDILQSRNIIMSKATDIVRQKHQKTHAKDKDIIALIVKDNMRMEAAGEATLSFETMRDQVMTFLGA  
GHDTTATGVAWTIHLSTHPEVQERVRAEIKQHYPFMFDHASRNDVDRLSSLDADNLHYLDNVC  
RESLRYIPPIPMTVRETITDDRLGGYDVPAKTTVYIHANAIHRLPSFWGDDADVDFDPDRWDRLPEGH  
TTNAFMFTLQGPGRGICRKAETEMKCLMICLLSMYRFERDMAVDDPESWKMWRLVLRPRDGVQ  
CKVTMLEEEEEKMAIGA\*

>CYP6001J1|9791|Clagr3

MFKLFGALGSNGPDKGDESNYGDDSFTEAKVKQSGLLDDIKALGPNLGKDALTLEKVTSGKGPY  
DDRTFLMERLIALTASLPHNSKMRDKLTQKLVGTLWDSLQHPPLSYGGEQYQYRTADGSYNILFP  
DFGMAGMPYAKSVRSVKALHGAKPDPSLLFDLLMARPDGKFAQNTAGINSMLFYHATIIHDFRT  
NRQDANISDTSSYLDLSPLYGRNQEIQNTVRTFKDGLLKPDTFAEERLLGQPPGVCVMLVMYSRFH

NYVAQNIAAINDDNRFNMPRQGDPDYNLKIQRDNDIFQTARLIVGGLYVNISLHDYIRGITNIHH  
SASSWTLDPRIEVAGTANTPAVERGVGNMVSAEFNLLYRFHSAISQRDSRWTDQFFKSIFGDKDSQE  
IGLEEFYRGVLKYEASIPPEPSEPVFGGLARNPSTGAFNDGDLVTILRESIEDPAGAFGARNIPKHLRT  
VEILGIIQARKWEVASLNEFRKFFGLKAHDSFKSINPDPEIADLLRKLYDSPDMVELYPGLFIEDAKPR  
MDPGSGFAAPYTVGRAVLSDAVTLVRADRFNTLDYTVATLTPWGM AEIKQDYQTLGGSMYRLIH  
RALPKWFKFNSVYVMQPMYLP SMNEKILKELGTMDQYCLDPPGPPPKTTLLNSHAAITALLDDHA  
NFKVKYGLQLPDLVFP EYMLTGDSPKNRDNHKFVAQRMMNVPGGLELYAKSFYDTTRKILARESY  
KLGNTFQVDITKDV ARVVVVQTHSEFLNLGLSQNGKEEDTLSEEEMYRCMVNYLNYAIVDGDIAES  
WNLRR EAHEAF AKLKRTTECAVRKHGRIGGLVGNFFAPPPAPKGS LKEVGQKLTQDLLGAGYSVE  
TTATTLTTASGGISNPSTFVSVDWFLKPENSHHWA AVRKLAAKDTAASYETLKKYVLEAGRLS  
GFLALVRICVPERGEAAQIRTD RGSMTLRKGEVVVCNATAAFRDASAYPD PDQVKLDRPMELYQ  
MWSIGPHRCVGRAIAITALTSMIKACAQLKNLRRAPGDQ GKIKHVPGPLPGSRKYLSDDWSRYQPF  
AGTWKVHFDDYSS\*

>CYP5436D1|10383|Clagr3

MTRSEWALLMRSKDPGYLFTGRAYVQSQQRFLGCLSFGLQIKGETWQFTGKIHAQYGSIVRIAPDEI  
STTSPGAWKDLYMTKPLMPKDPFSQTPPMNRAESLFTAAGETHHRIRKTFINAFSDRSYKDQSPIKE  
SYASLLMTRLHRER GKDPGGKVNMAKFYGYATLDIADLTFGESFYGFLLGAKFGSVQNSLSRYHPI  
DKKTATDKISRRLEIGDIGPSRSEFITPIVRKLNDTQTKGITRKEVNTNGLAVVIAGCQLTTVALATYT  
FLMLRYPETLKRLTKEVREGFESESQINTYSTMNLPFLAAVINETLRIHHPTPINLPRVVPPEGQMIDG  
HWIPGGNIIGVNLQNIQNDPDNWVEPHVFHSE RFLPKTDCRYEQRFDKDDKQSFQPF SVGGRNFM  
GGK\*

>CYP578Y1|10401|Clagr3

MASLTIIGLVLSLLLLFYKYIVFPAFLSPLSKIPNAHYTAPFASLWISSKRRASAGTRAIFSLHQKYGPV  
LRLGPNELSVCTPAALKTIYIGGF EKDQWYQDAFMNYGSPNMVSMLEHKPHSVQKRMVSNLYSKS  
YLQSS EDLQKASTHMLDRFLPIMQSVADKGVEMDVLDFLQGVGMDFTSAYLFGLSNGTDFMHD  
VQYRQHWLAEYSVFKDQLPHERAGGEVERWCLAMCEAAEEFLHSENAENDSLTTQPVVFGRLSQ  
SLAASSTKLDSKSHLMTTASEMLDHLVAGHETSGITLSYFMHEISQRPALQDRLRSELLTLNPPIRPG  
NNSIPTPRSIDSLPLLD SMLQETLRLYAAAPAIQPRRTPSSPGGTTIEGYKNIPGGVRV SANAYTLHRN  
PEVFPEPLKWIPDRWMDTTKGNKDEMKRWF WAFGSGGRMCLGSNFAIQDMKLIIAAIYTNYTTEI  
VDDEGIEQSDTYISRPIGDKLILRFKHI\*

>CYP5436C1|10437|Clagr3

MFLDTSVSSATPTLSTILAWSGTIFLLYYLLSALYSIYLHPLSKFPGPVTSSFSRLPFIRAHFGGKLHDYT  
YAIHAKYGPVARIAPDELTISSAAWKDIYQLRPGLPKDPYSRTPPPNGAETLFTAEGDTHARIRTF  
ASAFSDKSLREQASTIETYASLLIWRLRRDIHQDSSNVVDIAKYGYATLDIMGELALGDSFHSLDGN  
NENSWVHLFFKGVTFGSIRTSLSRYYP LDMIFGSIFLRLTSKIRMKNMALGTS LIERRLKMGMGIVR  
NDLMTPVSGNIISHPQEGKQKGLTRAELDVNVLSMILAGSPLSHIAMS AVTWYSLRFPTAMEALTR  
EIRTSFEKEEDITV VSTQDLTYLGAVINEALRIHHPTSPDKPRLIPPEGLQVG DHWIPGGTSIALPFRA  
AFLSPLNFTDPLSFHPERWLPESH PAYDPRFAND DKEAFKPFSTGTRNCMGTKIFLAEARVCLARIV  
YAFDIQLAMPDEWDWPDQKAYLTHEPKSVWVKLVERL\*

>CYP5095N1|11287|Clagr3

MENSKLSLVAPYLVLSILYLI AVVIYRLYFSPLARFPGSKLTAATGWIETYYDVFKGGQFTFQLQKW  
HDQYGPPIRINPDEIHVSDPDFYDVAYASSAPFDKTPKWLDR LGFPGAVQSTVQHELHRSRRMTLN  
PHFSKKS VN NVSWFIQQRMDRLCDRLREYKGTGEVVTLNDAWGAVTADIIVKHALGFDYNFVN  
YPGFVAPFTRSLKELVLSVHVAGHPWFLKLLQFSPDWLVGLLNPGMKPVFSLQNEIKKQIIRIKQL  
DNQNDSTERHETVFTDILGSYLP PQEKT TTRLQQEAGSVVGAAIETSKATLSVTSFYILHNPEILRRLT  
TELREASLGDPETPTWPELEQLPYLTAVIKEGLRLSSGVIQRLPRISKHKAIQYGTYSIPPGTFPSSYI  
QHTSPVFND CFANPD RWLTTVKVAPAHGREEKSLDRFFVPFSKGT RSCLGQHLAWAELYIGLATL  
FGRVDLELFETGLEAVTTAREYFVPLPSAETKGVRVTVR\*

>CYP5094D1|11364|Clagr3

MSLLVQCWTF LMSLLLYVTCLVIYRLWFHPLARFPGPKTAAATKWYEFYFDIVKRPGGTFMYEIQR  
MHDVYGPIVRINPDEIHHIDPEWLDVLYTRAPKSVRDKYEP AARMTGMPESSQNNLLTSEASTDTL

WLVFGTVSHDLHRKRRAAISPLFSKGAIKASETMIYEQAELLCVSLEKQLDQNGIAEMRTNFTAWA  
TDVISILAFPKPLHLLLEDLQAAVDYHLSTKASMLLTPLQKQFPWLIETAWTLPQALVRVMSPDLARS  
VVLYRDMLEQAKAVIHENSKATLGDCVGNPPSQVSMKTDSGDAFQAIACDSLPLHEKQEHRIAQ  
EAFNLVVAAGATTAVILTTATYHLLIDQDNYLVRLEELEAVMEDPYTRVSVQTLEQLPWLELLNT  
TDQSAVIKESLRITGLASSRLPLVSPKENLRYGEWNIPAGTPVSMTPRDILLDPSYFPEPSKFLPERWLS  
NNPDLARMERVFVPYGRGTRVCLGMKYVILLTVTPEHSSLADTPPISSLGHSELYIAMACLFRRFNF  
ELHETVRERDVGVRDCFGIEPSLESQGVVRRLAKTAVM\*

>CYP584L8|2841|Clagr3

MATFQLPDLHLVLLASIFFYVIYRVYWELTTGASRRALIKEHGCCEPIKRNPDYNYFPNNVIGYRTLLE  
NIAGIKQHNFLERIRNRYLRFGNNTMMQRMIFTNMIQTIEPDNLKTMLAVNFKDFSGLDRRTSALT  
PFLGHGIFSTDGAAWQHSREMLRPNFTRSQVGDLTIFETHAGQLINNLPRNGVTVDLQELFFQLTM  
DSATEFLFGESTNCLGSTASSPNMKFPECWNRGQEAVAEGSRSGKLGRLNNRAQFQKDTQFVHE  
FADRFVRKGLELRMNMDVEKAGDEERYIFLHELKQTSQVQIRSELLNILLAGRDTTASLLSNLWF  
ILARRPDIWQKLRTVDALGGEPPTYQEIKDMKYLRVAVLNESKASIHFPFLPFPIKISKLQTPSALRLYP  
VVPGNARTAIVDITLPLGGGPDGKSPFIPKGQIVQYSVYAMHRRKDFYGEDAEFEKPERWETLRPG  
WEYLPFNGGPRICLQQFALTEASYTTIRLMQEFSTIEPRSSQPWQEWLTLTCAVHPGCFVGLTPTT\*

>CYP584AQ1|3933|Clagr3

MLFSYPLTLLQTLAAVSLCVVYYLYLEITVALPRRRLAASKGCLPPPCFPASDPIFGLDFFYENFKAL  
KAHRALELFAEKYWRLLGRNTAKLNVFGKTIFTTIEPENVKQVLSLSFKDWEIGEQRKKVMEPFLGE  
GIFTTDGAEWQHSRDMLRPNFVRAQVGDCMFERHVQHLIRAIPKNEETVDLQPLFSKLTLDIATD  
FLLGKSTDSSLQEGADAKTKKFVKIDHAMNGLGSQDEGLIFWIAVMMGIMVQNWTLRGFEKIV  
HDYVDGLIEKALAEKQENLEVEKNQDSIGSGDKKRYIFLHSLLSQTTNKLKIRSELLNILLAGRETTS  
ALLSNLWFLAKNPHIFAKLQHEISTTLPNDGEPPTYEQLKEMKYLRVAVLNESLRVHPIVPENARIA  
QVDITLPIGGGEDGKSPFVKKGQIATWSLYAMHRRRDFYGEDAEFEKPERWLDTDEKKGLRVGW  
YLPFHGGPRICIGQQFALTEASYITVRLMQEFSELESRDSEPWYAKPFLFPYPPMFAELVLLVGMRLT  
LCFLCCGRREKFSLICSNFGGCKVGLKARV\*

>CYP6839B1|5322|Clagr3

MEAANSHLASSFLGKSIFSEDGAYWEHSRNLIKPTFSRSEISDIDLLDTFVERMIHLVPRDGTDAIDIQ  
LRHKLFLDRSTYFLFGSSADSLPDTPFDTPESINAFNQSLAGVGRCRRVSMRLFIYTFDKSWRVAYG  
KVHKFVDSHVKRALDQTAKEADPAVYKPSIDGNAARHHYILLREMAKEIRDPIELRYQIFQVFLP  
ARNTTSIAVGNALFHLAKKPERLAGTASLVRFRHVIQEKIRLQGPSGPVLCTALQDSILPVGGGPDG  
QSPIYVEKGVVVALNVWCLHHDRDIWGDDAHKFNPWRWIDKRPMDWDFVPFLGCPRICPAQQQV  
LIQAVYVLVRLVREFARIENRDPVAEYVEFTKMTTESRNGVKIALFPAESNLQ\*

>CYP584AV1|9094|Clagr3

MRLNEISLLTILILTYLIRTLKLLSRSKIVAKYGCLPPPSLPQRDPIFGLDVLLQFFKALKENRRNMS  
MNELFQLHGGQTFQSVTWGSTKIYTIRPENLQAVFATDFSSWGVQPMRLFAFEPFVGRGIMCVDGAL  
WEQSRALIKPTFTRAQIADLHLYAVHVNKLIDLLPKDGSTVDLQPLFSRLALDSSTEFLLFGESVGS  
LSPHSISTDAKSFLAAYDYGMVVGKRLHLPKWNFLTRDKKFWDSCKIAHEFVDGYIAQGRQLCE  
QSENGKVVPERYILAHHEMIKQTRDHNDIRNQLLNVLPAHEATGVALTNVFFNLARNPSCYAKLR  
QEILDAGEQAAWTFERLKSLEYLYVINETFRNLPAIGTNTRIALRDTILPTGGGLTGTRSIYVVKGD  
IVTMSFYALHRRKDIFGDDENFFRPDRWKTLPVPWVSFVTFGGGPRVCPGQQALALTEVAYTIVKIVQ  
SFPMIENRDPVKEFVEVYKITTTSRNGAKVGFPTP\*

>CYP52AJ5|9656|Clagr3

MTFNMRLSPFSFLGLVLLAYKVSSTREKRQHAEEAARRGCSTCPVLPRKDLFGITQFRESIRAT  
RAERGPRYVVEKLDMSGKDVHTIQVRVLDYDLNVTRDPENARACFSSQSSDFDIGVHRTQSWKPLL  
GVGIFTSQGEAWKHSRALVRPQFTKEQISDLDAERHTRDLTKKIRAGSDGWTETMDLQPPFYNF  
LDTVTEFLYGYSVHAQNPDARAALPTVRGMDEPNLLELGVNFDKGKRWIEERGAFYKWWYLISSK  
DFDYRCREIHKLVDFVYCRLLQGGAKDTPDTPDGRKKFILLNELAKETQDPLELRNESLSLLFAGR  
DTAGALLGWVYFLARHPHVYNKLSIILDQFGPSPTSEISFQQLKACSYITHVINETFRVAAVIPLNE  
RVAVRDTTLPRGGGPDGSRPIFIPKGRQVLIATYAMQHRADIWGDDVEEFRPERWEEGRKVGFEFIP  
FGAGTRACLQQFSHTTETSIVIRFCQRFDRIDENMEPPGPIRLCHAIENRSGSGVQVRLHEAEKS\*



>CYP539A53|10665|Clagr3

MLDLLTFHPILTLLTLLLLPTLYFTLTIRLESRLISRLGALAPHVPSPLPFGISIFLRSITASRHNTDYEFW  
SYLFSHSPHPSQTVETHLARQRFIFTADPENIKAVLATQFADYGKGEPFHEEWKWFLGDSIFTTDDG  
ELWHASRQLLRPQFVKTRVADLEIFEHHISKLMALIPPGGGEVDISALFYRFTLDSATDYLLGKSVD  
LRNPDTKFATAFAEVQSVQNEMSRAGPFQKILPKGKFWRGLRVINEFVEPFIDSALALNPADLKEKT  
GQSFLHALAATGTRERKVIRDQVAVLLAGRDTTAGALSFTFQELAGNRRILDKLRREILETVGERK  
VPTYEDLKNMTYLQVRMNETLRLYPSVPFNVRMSLHDTTLPIGGGPDGMQPIGILKDTPIAYSTLYM  
QRREDLVSPSADFPVLTYPWENWTPKPWTYIPFNGGPRICIGQQFALTEMSYTIIVRILQRFDR  
EKYWQEETQGLRSEIVLSPTNGVKVGFWEAKSG\*

>CYP52K9|10690|Clagr3

MHILNRADEAFGESHGCRPAPRLRNGWPWGIDRLQIFEADRNSRLMELFLHFHEDVGNTLEQKFL  
GTPAFGTIDPKNLEAMFSSKFEGSCNDNQRRISYSYQADFDYGLCRQIFYPLLGDGIFTQDGRAWKH  
SREMLRPQFARQQYQDLDFREHVDDLIASMSKSKQYVDLQPLFFRFTLDTTSVFLFGESAYSLRAN  
QSAEDNKFAREFDIAQDYVVQRYRYLDLYWLIGRRFQDACASVHTFIENIIDRRQASRDKNPDSQ  
GRYVLIDAIASDRDRKALRDQLVNILLAGRDTTACLLSWTFYLLPRHPQVMARLREEIRSATGNNE  
DLKREDIKKMTYLANVLKETLRLYSPVNVNTRTVHRTTVLPTGGGPHRSPVLVRKGDNVAYCVYA  
MHRRKDLFGEDASEFRPNRWEEDLPLYHDEINAKWGYPFNGGPRVCLGQDFGLTETSAYVVRIL  
QTFPVIRAGQFNRPQSQEWLGYSFHHKQGVPKLAKERQKMTLVMSARDGCPVELE\*

>CYP534N1|6993|Clagr3

MPSTIALTLLALTALWALKIYQFAQNLA AAKASGIKYTCVPFFVVSRIYQLACIVIVPLVRS  
EPWFDMTLIDWEWARRYESFKRYGSDTFLLVTPERNVLYTADADVISQMTTRNDFPKALEVYEV  
KIYGNNVVTSEGQLWRHHRKITSPPFSEKNNHLVFTETLGQCQDMVDSWMDGDKESKTVHTVA  
DDAMRLSLHVISRGGFGVRLEWPKKAKAAENGHVKGEEGNTSTASVPEGHTLTADALGSLLHN  
LLPVLIIVPKFLLRNLPFQWAKTAYVSYDEWGNQYQKEMFREKKASVLAGTEGDNLDLMIAMIKGAG  
ITAESASQGEASRQTLSDQILGNAFVFIAGHETTANSIHFCALLAMNVAQRHLQSDLDQIFQG  
RPPSQWDYDQDVPKLFSGMAGAVMNEELRLIPPVIGIPKSTPKGSPQPLVVDGKKCTVPENTYAVIV  
ASAAHRNPQNQWPTGPPSDPEHPTHPLSNPDNDLEEFKPERWLLDPNSKSPATHMPDTDTEAST  
IGFNTSADTSSLLYRPPKGAYIPFSEGYRSCLGRRFAQVEILAVLALIFTQYSVELAVDAYATDDEVAK  
MSEGEKKVWEKAKGEVERQMREDMRSVITLQLRKGSIGLRFVRRGRERFAF\*

>CYP6456B3|3122|Clagr3

MEISLNISVLLVLAIASATTWYALDYFYVPKQLPNEPPLIGHHIPYTGHIIGLLRHGTRYEII  
SANCNLPIYTLKMLNMKVYVVTSPALVNAVNRNSKKIAFNPFIAQLGKRMTGHDEATGQIVQHN  
NGEDGPGYVINVDGTVASLAPGKDLEQMTQAMLKQVSPYLDGLAIDGEVNLFEWTKKMVTMCSTRA  
VYGPDPNPFNHDETINSFWEYDRNLNLLIADIAPSILAPKGYRARNKLALAFQKYFENFDPSASQ  
TSAMIRARYTNATRHGITPLNQARLEVGTILIGILANTIPTIFYLLVHIYHDPDLLSDIRKELANQ  
DLLGTPEIARNPKLLSMPELCPLLHSTFQELLRVHALGTSARYILDDVILDDKFLLRKGMIVQMP  
MAVMHNDPTAWGDDVKDFQPRRFMKQKNVYKKNLTVYRPFGGGASLCPGRHFVTLETMALAAVM  
VARWDMRPVEGGWRVPGQKQESLATNVFPPERDIKVKVSLREKNSLNN\*

### ***Dibaeis baeomyces***

>CYP6001J3|12221|Dibbae1

MAEVAQNYETLGGSMYKLIHRAFPGWFKFNSIYVMQPMYTPKMNQAIQKELGHIDDYVLDAPA  
PPPKVTVLATNAAIAPILKDQANFKVKYGRQVPDLVFADYMLSGDSTGCRANKDFTSLRLNKC  
PGAHDVYFKGFEDWTRKILTREAYKLGKFYQVDMKSDVARPVVVNTHAEFMNLPICKRGETTG  
GMTEEEIYTYCTNYVNYANIDKDVAESWNLRLRLARKHLKALTATEELVKKTAHSTGVIGHFFG  
VAAAPEGSLRAIGQKLT KDLLDSGLGVEKTAVVCSATAAGGVANLPTMDLK FVEALNWFLK  
DENKEHWA TVQKLATENTPEAMDKLKHVYLEAARLSYVISLLRICVPADGAGQISVKDDK  
VYYDGNDMVVHAGEVIACALTAALHDP AVFPDPMTVKLDRPTDVYQLWGIGPHTCVGREIV  
INGLTAMIKVVATLKNVRRAPGSQAGRFSQYL GILVVAVI\*

>CYP5076P1|200|Dibbae1

MRSVLQEYFAEEIDTRVNLDLSLVNAISTQLQQLRSDGEREQAWCLVYLETDFEDREARWATIKAN  
LRIAAAKVGITLRTIVENETAQTRERKNNRFPKRKRPVYDYSEDSGDFPRRKRRKLLAPAPTPTPT  
GTPADLIDKKCYLYTPSSGKSIKRSIPTIRAIGKEQSKTSNKVPQKNSLLQTALSNLKRCQKSARRPI  
PDGYNVWKREMPKKAVAFRFFDLDSGLNTAGGFLAGRFTDMENKECIDLQHTEDPVPPADFFS  
DEFVESAFQHLTRVKKPTPFISLRENLLSVMHHGLISKTACVAFVDLRYISLHQPFHFPRLFPFGFKIS  
QRLKELGKVQDNFYSAYGEWLVDRIETEAVVACFSVDRFRRYMERYPRIKIVLRLEELEKCTGAG  
DYKKYKRMLKKTALQLDLSLDRNSGTSIGHFLAFTGLSKINLKDVALKIGRNWKLIGSGEVKRKGPF  
LEGVEDGFEEYFTDLGKNNEIDIDEFALTRKKIKATLGSKGKLYDTAGSHHCPMVGVEINQPVVDP  
FQMDLLGTDPLGIACARVWADRVAQADQMDRYGDVGCETVQEFNTEPAPAEHLISRPDSRSP  
ISETDHDLDQHNDVTTLLSDLNLNNEHQLSNRSRNLTSPLSHSAQPSPNVQISLDRPRSTYKPGPNL  
QFCLRGSTHQKTSNTQRYKNSLFKPFSPSTPGGSTGKHTNFSKYLYRPTQNSSKGANEIEVRREVIITS  
KYFFPSKTSQRTTASSHQLRKQQIISDSSGMAVNNSMARGGLSMSQPTRRKLFEGEIAARAKRGNG  
ADDDDLAPELVVRSHSNIPRIPRIKNNSVRRRAAVSKPSVSRPAESKVNLSVIKRFKRSTQDSKAK  
NGAFSVVQLAANLGARVSRPDASKFAQSNHWRSAAAAPGVEVFATRPPSTNNHNLRENEVSAV  
VTNAMDWLSDYNGDDVLPSETDVNNVEAWREKVFREKFEDTTSQTIADLASRRSSATTGIIKAE  
RSLDAPMETHSRPPNRIIQRITLRESKVETEYVQSRSEDPQASTNQARVQVWDSQDAQRPDSQIVI  
QPSPGLALDFALPRPNAEEGEASEDEDADIENRDPGLPKLNTDKQEEIFTTRREMDGFAAAAAGI  
ASHLFYFNHGEHHMYAVRYIQSFFAVFAIAMLYGVVYCHQDAGEVLSYMLPFTACYLGGLYTSLL  
CYRIFFSPSNSFPFGPGAKISKFWFSTQLTRHDAFKKIHQLHQKYGDFVRIGPSELSIVHPKAVQAIYG  
FGSKCRKTAWYDLLLPIISLETIRDRTIHDARRRIWAPAFKEKAIREYKDRIPHQERLIKQIHANSGM  
AINISKLFMLYGFDVMADLAFEESFGMLQSNEYHWAVKLLQEGLKPLGFILPEWFFRIMSVIPGLAD  
DWFKFIGYTKERLYERMKVEKAATDIIDTTAGALTHIYELISNPTCLETLRIELGPYLAPSVKLPPYED  
LSKLEQLDSVIYETLRLHPTLPTYLPRITPPEGLQIGDTFVPGDTIVTCPYVMGRSKSPHPGLDRSFD  
YETQHLLTTCLDAKDESAYVHAESFIPSRWTSQPSLVKERSAFAPFSTGPNSCIGRPLAMNLRTTLL  
RLLQTFDFGFAPGEDGRGVREETREHFTVEVGRCEVVFLEGRGKGMESEREN\*

>CYP5076N1|280|Dibbae1

MGATEGIEKYQQHAQLFAVVAGVCLHLGYFYHGEHHMYGLRYLQASTFFFITSTSALTSGYELPLA  
SSLFTTSFFGCLFLGLYGSLLCYRLVWHRRRFPGPATAISSLWYSTQVTNVDAAHKKTLELYNKYG  
PFVRVGSSDLMISHPLGVPPIHGARASAGRRPGMTRAGLGSQSIQVEIINFVNGEGRIVVYNKALID  
PLGEHGGRPVNAAKWFNYYSYDVMGDLEFSKDFGMLKSGEQHFHAVELLDDALSIQGLKLPTWIFH  
LLTLQSDSRTIIVAGSDTTVASLSHVFYLLAKHPGHLVKLREELLPLVNSDGIFEHQKIHRAHHLNA  
VISKALRLYPVPPTAIVRKTPPEGIVVDGPYIPGNMNIWTPQYVIARSEAAYERPFEFVPERWYSMP  
MVKESAGYAPFLTGPYGCIGRPLALMQIRLVIADAISRFDIAFPFGQDGSDFIDNTKDRFTWGLADL  
NICFRARVGRHT\*

>CYP53A64|460|Dibbae1

MFFSFLFNPIFLILVLPPIFYAFPYLKRWYLDIPGPPLAALSNLWLMYQCRLGRRYKAVDDAHTKYG  
TFVRIQPNHVSADSEAIPIVYGHGNGFLKAEYYDAFVSIQRGLFNTRDRAEHTRKRKTVSHTFSNK  
SIGQFEQYMQYNLQELVKQWDRISLDAVKSGKAWAEIDCLHWFNYLAFDIIGDLRELICQAFGSPF  
GMLSKGADIAEVRKTPDSPVTYAPAIQVLNRRGEVSSTLGCFFPQIKPYAKYLPDRFFRDRGLEAVENL  
AGIAVARVNARLEQSGESDRVDLLARLMGKDENGNKLGRGELTAEALTQLIAGSDTTSNTSCAFL  
YWATKTPGVIPKLQKELDAVIPEGVAIPDYDTVKDLPYLQQVINETLRIHSTSSLGLPRLVPEGEPVK  
VLDKSFPFGTTLSVPAYTIHHSKKIWGPDADEFPRPDRFSPENLTDLQKQSFIPFSTGPRACVGRNVAE  
MELALIVATVINGWDWELRQKGELETREGFLRKPLSCLVGMKKRRRA\*

>CYP51188A1|634|Dibbae1

MLVDVFWNLYTLVLNSRWVIGALVAAAVFQDAFNASFMWWHRPRKIRIEGPSLWFGKWWSSL  
KFITSAPELIMEGYRQSNEAPFAIPAREGYLVFVTSEEHIREIENSPIDQLSFHQAMEDRLKITYTFNGF  
VMGPIDPHDAVPIRVLKTLLRKDLPQLRPKIQDAIETFDFFWWKHIAITYHFSEELSLRVNCKIIFGED  
LANNQDFFRAAHKYHRQALVAMLTSHYLPRWTDKYFLPSMMALGGAMKKLDGHVTRAVKQRL  
QDMRQKGKENIPRDGITWVIEASTTKEQQAVERIVQQVFAIFFASAHQLPMLLMFATYRLCGHPEYV  
QPLLAEEAAMLKLPADHYKSVPLMESFLREARHEPLDSLVSQQRKVLDRDFTFTDGSSVPAGNVIC

VPQQAVMRDERHYDRPDEFLPFRFVNTANGSADGEDENGRGEDEVAIRKFTDLQPNFFLWGAAK  
KPCPGRWYASAVMQQFFVHLLTRYNFRLADPDAKLTMTYTTIVFPRPGLEILLQER\*

>CYP6196B2|637|Dibbae1

MPVALWNQSVIAIASTFSTDYDVSFNYTSLIAIGLAALYCLWRLWRFSSIRPFFHPDEPRELPYWIPCIG  
HAISFFGSSHDLIERGLYALRNPPAARDYTGRTHEPFALRVGPETLYIITAPKDVAQVYRRADVLVW  
DDHLNQIFLNFNGFNPQSLKLAWTKPVKGDPTYLENPNPNQPLIHLIENIYTKQLLPGVHMDT  
MSEVFITSLQTALCWPKMELFALETNIGSSTVSLKTLQCQYTLLEAGIYSFFGRTISQLDPKVIPTMLAFS  
KNAWMLFYGLPSMFSSAVATPKRALIETFAKFASLPESQRSQSWSVQQILIAQEIVGIDLNSRACM  
LIMILWAANSNVNNTAFWVLAYILYDERLRHAVKQEVNAAWESGELDIKSLCVNATVLNSTFHEC  
LRLNAGAMMGRRVSAPTRIGNKILKPGACILIPSRQLHSNEDVWGANHKDFDVKRFAGNEGRLK  
HSSYRPFGGGVSYCPGRKIAKEQVFGLVAILHRFDIAMSCKGRLEFPRIDASTPALGVLSPARMDMV  
LVDLSHIGKHM\*

>CYP5328E1|639|Dibbae1

MLGVNSAAVLVPLALLGCASYLLYGLLTNYNAARKTGLPLVVLVVDGCGNPLWLIIDRKVAQLVR  
RLPFGSGTFRFNWRGWEIWDYRAHQELGDGIIFVTPGKNYLQLCDAEAVSDIFQRRGDFPRPE  
ATEMLNIFGPNLGTDDGQWQRRHRITASCFNEHVNERVWSESIHQAIMVRYWSSKPSINSVAA  
DTRTVSLHVMGAVFGKSYPRGAGEKRPSEEDSTSYGEALRVILDRCIPLVVLGRKNLSKSWLPKS  
FKELYQATLVFQEHMTKAYEDEKRATSRGEKQVNNLMTALVRASQADANKKDTYTGSRQEGLTE  
EEIYGNIFVFNFAGHDATANSLALGVSLLATRPDVQDWIADEINTVLAGVDSEESSYEAIFFQLKRCL  
AVTFETVRLYTAVAIKSTGSSPQPLKIGKSTVIIPKNTTIPNYSALHTHPRYWGKDSLEFEPSPRWTS  
DRQPNEDVSGPNAALHAEKFKEPPKSNPFVWWSGGARNCPGRKFSQVEFVGVLVGLFRDFRVKP  
LLQAGEDDAMARARLLEQIRKDTGMRLLLQMLHPEKAVLQWSHR\*

>CYP51F1|728|Dibbae1

MKLISILVEPLLEAYHKSPVLTVVATAFSCFVLIVLVNVLRQLLVKNPNNEPPLVFHWFPFIGNTITYGI  
DPYKFFFDCAKVCDPYQKVRENTERVYQYGDVFTFILLGKPHTVCLGTKGNFILNGKLKDLN  
AEEVYTSLTTPVFGEVGYVDCPNAKLMEQKFKVYGLTSEAFQSYVPLIVDEVNLMMKVHPQFKGS  
KGEVNVPAFMAELTYTASRSLQGKEVREQFDSTFADLYHDLDMGFSPINFMLPWAPLPHNKKRD  
FAQKKMAQTYMEIHKARKEGGMKKDSEDMIWNLMSCVYKDGTPVPDIEVAHMMIALLMAGQHS  
SSATSAWILLRLATRPEILEELYQEQVSVLGADLPPLTYENIQLLTLNSQVVRETLRIHAPIHSIMRKV  
KTPMPVEGTPYTIPTSHILLSAPGVTSKTPEHFPNPAEWEPHRWDALDAAKLLERDEEEVEKIDYGY  
GLVSSKGAASPYLPFGAGRHCIGEQFAYLQLGTITATIVRHILKRTKSGRKDDIVGTDYSSLSRPLN  
PAVVLWEKRDPTAE\*

>CYP59U2|845|Dibbae1

MANLTESRRDGPFGGMWSFSLAFNAAATILLVSSVGYFFTKLYEARMRVRDKQKKGLPVAPGHN  
FLFGHLLYLKEMLDRLPRGAHFQYAFGDIARQHFEQQGALYIDLWPLSGLFLATVSPQVAVQAAQT  
NLTLATERPYLIKRFKPIAGGPNLFDLPPEEWRPWRAVFSKGFSAHDHLSLVPGMVKETYTYCETLR  
RLAQKKELFYLDPTTLRFTMDMIGRTILNTSLGAQRGKNDLADGMLSQIRWHQANAETNPFEYLN  
VARWYMHWWNGRKMDRYIGNQLDKRYAEYRADSENTRSKAVIDLVLQAYIPEDAKSKPEKLDPE  
FRAFATRQIRLFVFAGHDSTSSTICYILHLLSTNPSTLALVRAEHDKVFGTDLREVMSTLKKQPHLTN  
SLPYTTAVIKEALRLFTPAGCSRQGKPNVCITDDQGNLCPTEHAMVWLIHVEMHRSPKYWVRPDE  
FLPERWLVEPGHELPMQYAWRSFEHGRPNCIAQGLVMTEL RVVLTAVVREFDFQPAYEEWDREH  
PSKGGQMYRGERAYQIEEGAAHPVDRYPCRVSIRKRGDT\*

>CYP65FJ1|892|Dibbae1

MVQVDANEQDHARFRRLLSNAFSEKALRDQEPILQTYVNNLISKLHEQIDGPKKGVVDIAEWWNF  
MTFDIIGSLTFGRSFDCLLETGELHPWVALLPGAARTMTYLLALKHAPDLVFKALVILIMPFLSTRREH  
QEFTNEKIKIRLSDNTERRD FITPILKANDEKGMTYPELESSINLLVTAGSETLATFFSGAVYHLSRNP  
QVMKRLREEAQTTFHDTRDVTMAEVHSLPYLNAVIEETLRIYPPAALS LTRIVPPGGAICS K KIPAG  
TGVGVTSWAATHSPKNFTAPEEFAPDRWLDDPRFAGDDRQASQPFSMGARNCVGKNLAYAEMR  
LVLTRLALDFDVELQPESKKWNLQKLFTFWKEPALMVKVIGMREL\*

>CYP5039E1|895|Dibbae1

MTTWYEAYYDLWLGGQYVWKIGELHKQYGRFFPKADRVLFRLLTSVNKGPMIRINPHEIHCNDP  
EFIDDIYAGPSRKTDKYRFTGRKLTTKQSMVATIPHEIHRKRRGAMANFFSKSSVRAVEPIIQNSLRK  
LLWRMERASKTGEKMPLMYVFKAATSDIITKYAFGKSTNFMDMDNYNMPPFFKAIEVTFLMSPALM  
HFPWLGPLMEALPQPITRMLMPGLADMYRMREGWMAQIEEIKNSKDKDAGVGTIFDGVLSKLP  
EEEKATARLGHEAQLTVLAGQDTTGKHMHHYGTPEAETSIATTLSSAVYELLANPDKLKKLRDE  
LIATFPDPDQPLNFSEVEHLPYLGAVIQECLRCHPGVITRMARVSPEVPVIYDRNGKHYTLPAAGTPM  
SMTSTHVHFHSDFFDNPREFCPERWIENPRLDKYLIAFSRGTRNCLGINLAYQELYTLLAGVFRKYD  
VFDGTGTQKMPTLELYDTLRERDMDNFDYIVPFPAGKSKSVQVLVRHWVAEEAKCEEGR\*

>CYP5039D4|898|Dibbae1

MDPIKQTFEAERGFSAVYLVAVLLGSWTVYLVGLGLYRGPKLAALTLYQAYYDIWLHGKYFKQIDQ  
LHQEYGPVVRINPHELHINDPSFIDELYTSGAKRRDKYKWAGRSVLLPDSLVATEPHGLHRMRRAA  
LNPYFSKATIRKLDPVIRNGLAAILRRLHDCAKSPSIFHASLAYKAATCDMITEFSFGVSTGYIEKDDY  
EDSYFKAVIDDLNMAWMMTYIPWLGPMNSLPPAFMGVIYPGLKHLWSMHSRWVAQIEKIRAL  
DKRDSEGTVFHGLLNSDLPASEKSNRRLRQEAQLLVLAGQDTTAYSLSALTYQLLANPEILRKLKEE  
LQRALPDPDTPMTSAQLEQLPYLTAIVQEGIRLHPGALVRQTRIPDQTMIRYDADKKKEWIIPGT  
PVSMDARGCNLNPKAFADPHKFMPERWIDNPRLDYMLSFSGKTRICLGMNLAYSELYMILAGIFR  
RYELYDGTQKTAPTALHDTMHERDVDVIHDCLVPFPAGKSKGIQVKVRAGTEL\*

>CYP65DY2|1002|Dibbae1

MYAKYDSSWVVANQLRLMSTILANLTIVILALALRILYNIYFHLSSFKGPVYLVASDVPLALLQL  
RGTSHTLAKAHEKYGNVVRVAPKTLSEIPEAWNDIYGYRKGRAVLPKDPLFYNEMLLDKETITL  
ASDDDAVPIRRAINPAFSHKALLEMEPMLLSHIDRLMTQLAKTNQEQGSVDIRQWFTFSMFDINDS  
FAFGEDLGCVKRGEYHEWVQFVVEYFYAATLIHQCHKFWPLNRVLASLIPPSVRDKKERHSEASLQ  
RVRRRMKTPTRDPDFMSHFLRHADKEQLSKSVIEAQATVILAGSETSAVALTAAAYHILSNPDVHK  
KLSDEIRSTFATSAEITLQTVLSKLPYLDAAVIKETLRIHTPLANGFTRVVPDSSGTVISGNWVPNTVV  
TINHICANMSVRNFRNPHTFIPDRWLNDPTYDGDKKDVVQPFVSVGPRDCPGKRFALNNIILTLAH  
LIWNFDLELGDGTQNWTVQDQRFNGWVQPALPVILLEKRA\*

>CYP61A1|1425|Dibbae1

MATIMNGSFASPLADANYSPSTFNGGLVATLTSGINGWSMALTGLLVLVAYDQVAYIWNKGTIA  
GPTFKTPFIGPFLESVYPKMERKYKEKWAASGDLSCVSVFHKFVVIASSRDMARKVFNSPMFVKPCVVD  
AAHKLLRPTNWVFLDGKEHVDYRKGLNGLFTRQALEIYLPQGEEVYNKYFTRFLEISQKEAAGKPT  
PFMPHFRELMCAVSCRTEFVGHYMEAAVKKIAHDYNNITAALVLNFPILPFTKSWYGKKAADM  
VLDEFKCAAKSKVRMAAGGNVTCIMDGWIKTMLDSEAYREKIEKGIQVDPSTKPNPLRLRFSDFE  
ISMTVFTFLFASQDATSSACTWLYQLMADRPEVLNKVREENLAVRNGDRNVFPFSMDLLEKMTYTR  
AVVRETLRYRPPVIMVPYIVKKSFPVTETYTAPKGSIMVPSVYPALHDPEAYPNPDYFDPDRWITGTA  
EQHPKNWLVFGTGPHYCLGQTYAQLNLMAMIGKASMFLDWQHHTVTPKSEDIKVFATIFPQDDCL  
LAFTERSA\*

>CYP676C1|1698|Dibbae1

MALEQILQAATGVQVTGLLGLAFCLSVVVYYRYLCPISSIPGPFLSSFGPLWQLWQVFNGHFEEAVT  
KLHEKHGHFVFRIGYNEVSISHPDALHDVLGAPLRKGDLYLPFAIPNISYNNLMSERDYKKHSSMKA  
NVSAGFSLSNIKSEPYIDRAIELFEERLSQQNGPVPLNLWISFLTWDILGESIFSKRFGFLQEGRDIGGS  
VANTYMLALYVTLAFSLPWLHALLGNPILRWLDFQPSMHTFDTMAAAVEARKINPEVRDDMME  
QWLNTWRKHPPDRMQEKEVLCAALSSMGAGGDTISSALQAFVYLLLNPNTHLWTLRKEIDDAHAR  
GELSKIPTQAEAQKLPFLQACIKETLRVCPSVPWNLPVVPKEGLTIAGRHTSGTLVSVNPYVIHHS  
LSIFGPDAHTFNPYRWLIADPNASKSLERYLIPFGMGYNACPGKNLAMLEFNKIAATLVRDFEILEA  
EPQTSWRFRFTVFIIVPGKWKCFLRRRAVSMRTGGEQVQKREEVGTKEVGPAQVHADDVEEKMKE  
KKEETDEAKATKNIETGENLEQRKEEKSEENAGEVDDADTQAPETPPAPAPCENEANPDPPNASI  
PT\*

>CYP5168L1|1969|Dibbae1

MFFWRTYAESTATWFGLVVRVLLSELGALVCCVYTDLGRKGPNEVTIFDPSILPLIYEDSENKFTKDV  
WLSTIIGVELGAMDLLQRVEALLALKVDSSDAEIKPALENYSVQIQKYADQLDQYIEKHASQSINAT  
QCFYWFSFDVMGRFAFSRFDLLQNEQWDETIESLHSGMSLMGPLSPVPWLVRVIFSFSFLPDVRKW

NRMNRWIAERLDERLERTVKEPDISHYLIEWSKNHNSLAADMHLLNGDAFTLIVAGSETVASTLVY  
IFYHLALHPHLSLLRAELSTIPNVRDPKALQSLPHLNGVINETLRLWPPVPTGGLRQVPPEGIMIDG  
HFLAGGTSICAPRWSIGRLPSAFPQPHAFIPERWSSQPHLITDRRAYAPFSLGKMNCIGQKLAFFVELR  
VVTALLVSRWDVRFRDGDAARKCIEGTKDCFSIVPGPLDLVFERRKDI\*

>CYP548A29|2252|Dibbae1

MLNYNNTKSVAESLASTLAIVLAVGSIYVFGVIFYRLYLHPLAKYPGPLLGRITDWYSVWQAWNGS  
RHLDIFYRLHQKYGDFVRYGPNNSVSVNTDTALQKIYGFKSNVKKADFYSAFPVNPGAYSTHSAIDKN  
LHARKRRVLSQAFSDNAMRGLQPHILHILRKFCNVIADLPVTTTTSYENKPKTWSSPKNMGQWTNY  
MSYDVLGDICYGKSFETLERDDNRFAVDLLARSSKFHYLNAQMPRLKKLGLDRLLFPKIRADRERF  
MAYSKSRLSERMKLGNDTGRRDFFHYLLNAKDPETGQGFAVPELWGESNVLLIAEDALNVRLGSD  
TTSTALSACFFHLLHSQHALARLTKEVRTTFSQLEDIVTGVQLSSCHYLACIDEAMRLSPPVASVLP  
REVLSSGIDVDGEHFLEGTVIGVPAYALHHKRQYYDPFAYRPERWLVGDFSNENVAFTAEDVA  
LAQSAFCPFSIGPRGCIGKGVAYLELTIALARVIWLYDMRLTEGEDVGRDSDGGYTLIDCFIAHKDG  
PVLEFKLRV\*

>CYP682AU1|2447|Dibbae1

MAVPFIHDISISTAFGLVGAFLLSYAVFGAIYRLYFHPLAKFPGPKLAAVTLWYEFWFDCILYGQYTF  
EIGRMHEKYGPVVRISPNELVNDPEFIDTLYAGPGSRDKSEFYCNAGAMPGSTVFTVGHDLHRM  
RRSHMSMFFSKASVRRLSPIIRGTVDKLCAALETHRNSGKPVVISSAYSQFAIDIITEYCFARSYNLLD  
DQTFERSYHSAFSKARSGMHWRHFPWMFNMKYLPKRSVAVRINEGMIALRELQVELRAQVAEIIH  
EKEKGIPSDKSHATIFHGLLDSSMPDEEKQLSRLGIDGFSLVRACTETMGSSNGVIHEGLRLAYGV  
ATRLQRIAPDESMVCGDWVIPPSTGMTAVLVHQNPDIFFPDMFKPERWVENPRLDYLLSFSK  
GSRICVGINLAMEELYIATATIFRRMEMELYETDLTDIEVKYDNFTPKAKLDSKGVRVLIK\*

>CYP617AC1|2631|Dibbae1

MGLNAVAYTAVAFVTALLCLAAGVEYLLGVKNDPREPQYISPRIPHIIGHLIGIFRDKNLYYVKLRSR  
PDLPIYTLNLVLTGKMYIVNSPDLAVAVQRNSKTLFSAYAVKLAARVCGLSSQATEILADNVGGEK  
GPGGFSATFNGVVHSLALGPALQFLQVTLPALAASVDELATRSAAALPPEPMALTEWLSHTITIA  
ASDAVYGPGNPLRDRATEQAFWDLDAITSLAISPLPELLAPKAVAGRRVVDAITKYLKSGDQAA  
ASDYLQARYTTCFQFGISLEDVARMDIGNLSSLNSNTVPAAFWMVVYIFSTPTLLDSLRRELEKVLVT  
TLDNSDGTTKRTLDTITVKEKCPMFVSTFQEVRLRLALGATIRLVLQDTILQDRHLLKKGDVVMIPA  
PALHADAAIWGPNAATNLDPYRFVKNRNLSPQAETAQAQNLKAKIPNGAFRVFGGGSLSLCPGRHFA  
VTEVLCLVALLILRFELKPEPTVEGGANNWRLPAPTTRNMAAAIPFPEHDVSIYVSTRKGWEKGSW  
QVQASDLRGKFDVANVTG\*

>CYP5241B1|2999|Dibbae1

MSKEHLPQLPRGDFSVLSTLSQSFSFHASPESFISARIRSAGAQTLLINQLDDEEAGHSPSIVRARILGR  
HVAIISSHRFCEAVLQLSGGDGGNPITIRAAKPRESLSPDSFVAKAAYQELMADFFPPPNILLMDS  
HRAKRQAWNKQLESFPTDIAPLAVDIAKDHQSWTEGRAIDLYESMKDLSWRLLLGIFLQLNPGG  
KDYHLIESLQETLLRGQFSLFPVAVRAPLWRSPRYKAVEARKKLEGLLKEKISLQADYCPFLKQGRIE  
KNEVASHAVLFTSSIAVKALSSLLTASLLNLFLPSGVPPAEDIRKQDLETGQILLQSVLLETERLSPPV  
VGVMRRAQQDVIFTNGGDEPDTLIPAGWDVWLYFVGAGRDNNAVYPLADKFLPERFIKGETNHC  
FAFGSGFKCCLGSPHKLHVHVASVLIKSELKLEGSVEAEGVRGWLGWVNTSAEAFARDLKQLPC  
QRPKNPILIRIEHKS\*

>CYP5128L1|3127|Dibbae1

MAFLSPISYNESVHPSWLLLLLFLPTFLSLRTFYRVYFHPLRSVPGPFLAKSTSLWLAYHGYVGDDCIT  
IRRLHSQYGPVVRIGPRDVIDADGEALWPIYMDKGGFPKPDYYKTFDIGPHASIFSSILPGQRDEPVK  
AVNPIFMSNIRSAGNVISECAEFVNRLLEASRSGQSINLIDHTRAFALDAVSSYVFQSNYGSLEEK  
DGFSAAECVDMFISDSRWYYLPDLLTRLIQRYMPYLLPDTKATQSEHLVDQYLWGIISRGKDGKCD  
GSYQSRMLERNITETEVFSQCKDALFAGTDSTGNTLAQLIWYLVNRNPEKYARLKVEIKANRDGQTD  
IMNLPYLVNGVVKALRLTMTISIRLPRLVPESGWSYHGYHFSPGTVVGVSAAYQLHLTEAVFPQPFDF  
LPERWLEATPEMNRDYLPGKGARSCIARNLAMAELCVVTERLVSKDLLNGAKSDQEIEKYEWFF  
SRIKGDKIDISWPKKVQ\*

>CYP50230B1|3162|Dibbae1

MSEPTYTVFTLLNCTKTNLDYIPRIYGTKDEFLKTDAYAAFAPRVNGKAIPWWISILDREQFGVMKK  
PVVGFYTPAAVIKYEPLVDDMLKKFVDRLKGEINGETSKNLDIAPWVRYFAGDVIANITFGDGLGFL  
DAGKDIDNFLSHLDENND EIALYFTMPWSAQIFKYNRIA EYFAKDNRFYLNWSLKQLQKRFGSISE  
KQGTPDTKQTKDLLDHFLTAAQIPGSSPMNYNMDNIMNWTTS AIIPGSETVAIVLRTLIIYLLKNRS  
KYDKLYEELRSAELSYPTWKESQQLPYLDACVKEALRIHPIVGQGLERAVPESGLVMPDSYVLPKD  
TRVCINPWTVSQSSIYGENLEQFIPERWLQORTHETDLEYKDRIVKTRRADFAFGGGRHQCPGRNLAL  
LEIYKCISTLILSFDMLVDPAEEWHLIDRFVVRQENIRCWLKTRV\*

>CYP684M2|3389|Dibbae1

MDRRTHEIHPALAKEGPPFATTIIMLRSVFVGPVVRIAPNEVDVSDCEAAREIHRARGGFIKSSFYST  
AGRVQSMFSTADPSFHSNRRRLGPCFTEASLSTLEPVVLERVRLAIRKLGEESKNAGSTDILKWWT  
LLAMDIIGELCFGESFQNLEAGKKNQYATDIANAGSILPLRTAFPTLIWIAAYLPLPFFKNIAQARMR  
IFSUNKERVARYIQVVENNPDNTKKTLFTSLLKGGSKDLTELDLTVEAQSYITAGTDTTAVTLTYLV  
WAVCRDRKIQDTLVRELQSVPENLTHQDVRDLPYLNCVVEEALRRYGAAPGSLPRVVPPEGATLA  
GQHLPGGVVVSTQAYSVHRDPEAFPNEKFDPSRWENPSKKAKDAFMAFGTGPRGCIGIHLARME  
LRLAAALFFRTYPHARISTKDGMSDRDMEENISFLLMPQGHRLCLIEV\*

>CYP65FN1|3450|Dibbae1

MVAVTPELLLAPKQISISLGYVSLGLGILIFVYLFSGIINYIFHPLAKYPGSKLYTATFLPYLVDGWTG  
NLKVRNQQLH DRYGPVVRFKPNGLSYITEQAWKDIYGTRHGKKQLAKDEDFYARLHQTPDIIVSN  
DADHSRMRRLISHAFSEHALREQEHLILHYFDRLIAKLREQIDGPTQGKINAVRWYNYTTFDVIGDL  
AFGESFGGLEKGGFHFWIDVFMDSFKFHQFLKAMRVYPWIKVLVPIIAKFYPNLPHAREKHA EYTK  
ATIGKRLNSTAPHPDRKDFVDYILRYNDEKGMSIPEIERTSEVLILAGSETTATLLSGATFQLLKNPRT  
MEKLTGIIRSTFKNEDEITFQSTAQVQYLHVVLEESLRMYPPVPEMLPRKTPPGGEMIAQGQFVPGNT  
AVGVHQYSAYHSPTNFHLPSNFIPERWLPAGPDNPD AHRFAADNRNVLQPFVSGPRNCIGKNLAY  
AEMRCILARVLWNFDLELCPGSQNWADQKIYTLWEKGELWVRLSERKRE\*

>CYP59Z1|3598|Dibbae1

MSTVPLNIHTQYIPLAVRVKNLDLPPVFYLDTWPLGMQILFLSTPETCYQVTQERSLPKDEVLATFM  
KPLLGGNDLVTMEGNEWKTWRNIFNPGFSTGHMMTLMPNIVQEV SIFCEILREHAVKGDLFQLEE  
VATRLTVDIIGKITLDTDFNSQRGHSEYLTAFRTLLNWLSSGDEINPFRRWNPIRPWVQRYYSRILDR  
YLDGELEERYAGYQKLGEDVKTKRNSIINLAL EAYRAEHGQSKSTKGLDPTFKKFARTQIKTFIFA  
GHDTTSSATAYMYLLSQNPDC LAKLRAEHDAVF GPDIGTVGAQVSANSHLLNKLPYTIGVIRETL  
RLYPPASTIRAGAKDIYVKYDSKLWPTEGMMIWCVSLPLHRDPNYWPEPMKFM PERWTVPEGDPL  
YPVKGAWRPF EF GPRNCIGQELANLELR LILAMTAREFDVVPGFEEWDRLH SKTG VNVHFGGERAY  
QILIGSAKPVDGMPCRFKIRENK\*

>CYP6003A4|4288|Dibbae1

MAAADLRTLGI RGTLAATAATAAYLLYSNRNEISMDSASKKRKYQAGEEYEDPKVLSTTLFQDLK  
AIGFAEGKSQKEIHALVETIKNTGKPLDDK KLDTENLISLLTKLPTNSASRKALTNKLLDALWDTLQ  
HPPLSYLGGDTKFSTPAADPVVKSGELGGAPKLDPAVIEYVDPDGV TIRQSVPDAPSGIFQYRTPDGS  
YNNILNPNLGRAGTPYAKSVRSGKKLHGVRPDPGLLFDLLMKRDDQKFKENPAGLSSMLFYHATII  
IHDIFRTNR LDSNISDTSSYLDLAPLYGSSLQDQLEVRTMREGKLPDTFHEKRLLGQPPGVNVM LV  
MYSRFHNYVADILLKINEGGRFTLPDTKTKEERSKALAKQDNDLFNTARLVVGGLYINISLHDYLRG  
ITNTHSSDSTWTLDP RVEIGKQFLDDGTPRGVGNQVSVEFNLLYRFHSAISKRDELWLDDFFDKMYP  
DRKGSLEELTIQELAVGLAKFSASVSKDPSQREFGGLKRGPDGKFKDADLVKILQESIEDPAGSFGAR  
MVPKALRMVEVLGILQARKWQCASLNEFREFFGLKRHEKMTDINPDKEISKILEDLYTHPDMVELY  
PGLFIEDVKPMMATGCGICPPYSVGRAVLSDAVTLVRSDRFNTIDFSVANLTNWGMAEIDYDVNTL  
GGSMLYKLIQRALPGWFPYNSLHVMQPMFTKNANRKIAQKIGTYKWYTEADPAPPRPVTVLIKKS  
EVAKVLKDQKKFRVPWLPAVTDMPDGRKVDWYMLSGDGPANAENRKM MSEVMSSVKNLQKA  
VSTFISKSGSQILKDATFEMRPGFCQIDVVRDIAIPLCAGLVGDLFYMDLCNSEN PQGT LGPSDLYKH  
LLNIRVWGANNNDPGLAWNRRRWASEGVEIICKTGEELVRSVQAESRTRGLIELVTSVFYPKYRHR  
SAAIKEGSLRSCGHRMVQEM LARGETPERIVDNGWLN AFGSVGVPVTA FSEILQFFLLPENEKLWG  
QVQDLASKNNEKSDALLRKYVLEAQRMTSHQRNL RIVAETT VIGDKTLQAGQAVVLMIGEAGRFE

DPSDKEAVKDPKVFYKDRPDS DISHFSFGPHACFGREIALSYVTGLIKIIAGLKNLRPAPGNMGLLK  
WIQVGTERCYLSDNWSYLTFDPTTWKLFHFDGTGKGVYHAPANAS PQGSLPKAESSLIQVENVLRR  
QKREVMVEVEKTEGKCHAQV\*

>CYP65FR2|4578|Dibbae1

MFWLNRVADSIWLLVGAICIVYVAQRVITAIYALYFHPLSRFPGPRFAAISYVPYAFHLANGTFTNW  
VKEVHERYSEIVRLSPHDLFSIPA AWKDICGGAGHRSFEKDVAVYGKSPNGIDTLLTAPKPDHSR  
MRRVLDHAFSVKALRQQDPTVQNSVEKLIRCLYEQIDGRARGKVNLSDWYSWMSFDLIGQSATSL  
LLANRREWIHTGDLAFGESFNCMENTANHPWVQMVFGNLQGIVFLNACSRFPIFASLLPYLIPKKI  
KNMMGDHWGSTQAILAKRIAKSTTRPDFITPILENNSSKGLTPGEVEANASLFIMAGSDSIATSLTGL  
AWYLIKERDIMDKLRNEVDRAFHKDETEINIQSVDGLPYLCAVVQELFRIYPVALAGQAHIVPPEGA  
NICGFHIPGNTGVSMNQYAVYRSKVNFNHNPDI FDPNRWLNDPKYAGDRKDAFHFPFSFGPRNCIGK  
NLGLGATRLVLAKMIWHFMDLSEETDMNWLDQKSFIWQKKPLFVKLNPRSSRPPDIK\*

>CYP6120A2|4640|Dibbae1

MNHEWHKKYGPIVRIAPNHLFSDSHSVQKIIYGFGRTRTIPSFEKDPFRFFTPEVDH SKNIINECDKEEH  
ARMRRMLSFAFSTSNLLDNEDIVIRRSNEFLEMINGIKTENGKTGMNIVQKFN YVTFNIMGEMSFGD  
SWERRLKEQAGWYLF SILRISLMYAFTEHRYHWADVVDSTYWN DVMRAVVCIPGLFSLMEWFPPT  
RSRETLYRHA EYATEHTEARLKLYTSRKDFVYHILSSKGPSATNKEIASHFNVIMMAGAVTTATFLS  
GVLYYLCHNLQAMQRLQDELRGTFPDIESIKSKELMQCTYLN AVVEEGLRIYPAGAAHLSRIVPKG  
GVEMAGRFI PGGTRVSVHPWSILRNP NVFHMPEKFIPERWIASDPPGQM GDKLDRSLPFSYGPRGC  
LGRNLAYLEMRMILAKMFWKYDIVWFNGDEIDWERDTKGYTLWEKPELRCIVQERSMPGAQ\*

>CYP6187C1|4764|Dibbae1

MDALPDRNRLVLFSSALISFTLVYSIGLAIYRLFVHPLAKFPGPKLAAVTRY YEAYYDVWERGKYLW  
KIKDMHARYGRALSFTFSSFSMQYTVAIVQTGPVIRISPYELHIDDPDFHEKLF RYDGRWEKYDWYI  
RAIGAPYSVQLAVDHDHLHKMRR AALNPFFSKQKINSLEATLQAQIEKFCKRVEDFAYS GKLPLSYA  
YGAFTMDVVT EYAMEKSYGNLNREDFGADLVGSIKGIGPMWHFGKHFPWLLRHLLATAPSWLLE  
RLVPKSSQWTA FQENCLTQLRKIISASTTASEAIASKSHRTVFHELLSSDVLPPHEKSESSLRDNVQIVI  
GAGVETTAHTLKVITYHLYTNPTLLQNLRAELRTVQH PGSSVKLAQLEKLRYLTAVILEGLRLSYGV  
TARFIRIAPDHTIT YSPSSYSPSKTWSIPP GTPVGMSTLLTHHNESIFPDSHTFKPERWLEDAERRRLD  
RYLVVSFSKGRNCLGMNLAWAELYLCLAAVVARFEFEMAEGTGLEDVEVSSDQFVPAMRGAGRL  
DVFVKRVGV\*

>CYP59AD1|4974|Dibbae1

MYLQISSVSEHPVRNAFFVLVAIPIVAFCVELYKKRRRSYGWKKRGLPMPPWNPLFGNIPTLIKVMS  
KIPRDAHGHYAPYLIRKA FPDNLNQT FYLDAWPLGPQMLVVGSVETAYQVTQENSQPKHPSLREYM  
LPLTGGNDLV SQEGQTWKRWRNIFNAGFALSHLITLAPGMVEEVEIFCEKLGEHADRGEVFQMEE  
ETTGVTS D VIGKVAIDTRFNSQRSKHPFVMALRNQASWLVS NEIHRFHPFRPFTLWWNRRVMDKF  
LYGELERRIATYEERNAQTGSTTRSRTIIDLALD TYLLDESTKKSFKKMDTTFKDVAMNQLKVFLFAG  
HDTTSTLSYVYYLLSKNP SCLARIRTEYDFVFGPDSSEIASLIASNPQLLNRLPYTTAVIKETLRLFPV  
AATPRYSPDPNHTIWDSSGHVFPTEGCILVMNQCIQRDSKYWPS PNEFLPQRWLASPGEPLYPEHK  
GAWRPF EYGPRNCIGQEMALLEIKITLAMTLRRFDVVD AFE EWDRRKGR TGVRTVDGERAYQVLV  
GTAHMVDGFPARVVRR\*

>CYP682AY1|4997|Dibbae1

MSTTTSLSSLLAMLSPTLLL TILPLIYVLAVV TYRLYLSPLAKFP GPKLAAATFGVEFYWDVILGRYE  
WVIRDMHRKYGPIVRITPDELHIDDPDFDEYVPGTAKQVEKSKAIAGVFGKSLSIATVN HDLHRK  
RRAQLNPFFSKQTL MKYIGSVEAFLEKLSDRLEASRISQEPLNLRNTFSALTLDVISLYSGEEYNCLE  
MPDFGESLHKGIASAGELALLKQYPQFFELANMMPYWLVRRLDPNTMSLIEWRDDLANQVRKV  
VERYSKGESPKHASPTIFNTLLTQDVPPLEKSMDRLV GEGIALIGAGSVTSAQTMATCAFHLLSNPAI  
LQHLRH ELDTAFPDPAARIELIKCEQLPYLTAILKETLRIAGGITHRAPRVAPDRDLNFRGWII PRGN  
VVSMSWHATHMDANVFPAPLEFQPERWLPKDYSEEKAGKTTSSPLDKYLQPF GHGTRNCLGLNL  
AWAELYLGIAMVFRRFELELYGTTRADV DIAHDWIAGAPRLESKGVRVVITGRG\*

>CYP532A33|5125|Dibbae1

MIDSIIISLLEHWLFAVAVFVVAYFARNCFYNGLQKYPGPFLAAFTDWWRFWDLKRRPDITQLRL  
HRELGDIIIRGPNLTSLVADPKALKIYGLNKGFKSDFYPVQQAMSKGKRLPSLFSTTDEQYHANLRR  
SVNNAFMSALVQYEPMVDDTTTKFLDQTEAIFASKNEICDFALWLQYYAFDVGIDITYSKRHGFID  
KNEDIDGMVSFLGSIFGYVAPVGQIPFLDLLLKNPILRALDYYGIMSSPFPVVKFAKARMAERLSSD  
PEKTPSVARGDLLSMFLKAKEDRPDFFTDRLVMAVSMAGSETTAISLAAVFYLLKNPAYFQ  
KLVAEIDEAVRNGDIEDRESCIVTWTESQKLPYLDACIKEALRMHPAAGLLLERIVPRSGITICNNQFI  
PGGTIIIGANAWVIHRRPEIWGADCDIFRPERWLEVGVVEKRR\*

>CYP6102C1|5261|Dibbae1

MEEAALAYDEHWGLDNDNRNVGIYDTMQDIIAQISCSIFIGPPAYRLLKSRIGRSKNFLRHAIGFA  
RAVGTSALLLKPPDFLKPFGPMVTFPNRWHYWRSGKYAIIKERLARFSEKQKQPKTKSTEPDDFI  
DAHIRFASESPNPELEMTPEMIWLRIIGVIFTSLHTTVFTATNFILDLASSPPERGYIEVLRQEAQALA  
EEGKWKAGVAKLVHMDSAIRESMLNGIVTRGPERIVAAPNGVTPNGLHLPKGAHVGIASYG  
LRLEGYSNAADYDAFRFSRMHEQASSAPDASGYKNTDMVHTSDTFLQFGHGRWACGGRFFAAAE  
LKLMAFAYLVLHYNIKPLETRPPGWWTGDITLLPLKATVSIQRRASSTV\*

>CYP682AX1|5292|Dibbae1

MFQEVPPYRLAAILLGALALYTVYGLVYRLYLSPVAKVPGPRLAAITFFYEIYYDWIKDGRYSWKIAE  
LHEKYGPVIRINPEEIHINDPDFYDEIYHGSPSQGKTDKWEVSRIKESPNQTVATVGHDLHRARRSSY  
AFFFSKQSVRAMESSINACIDKCSRFEQSRKGEVNIKLAYSALTSDIITAFCEGSEYNLLDNPSYAE  
PLCDLIDHSISENIVIFQYFPWVFLLLNALPKAM

VKAISPGFALLIQYQGWKAQVREVRERNVDLSEKGEVLEKDASKTTVIEAIYNSKLPASERSDSRM  
MYEAQTMVIAGTATTAAALMVSTYFILSSPSILSNLLSELASVSSNPSDVPSLAQLELLPYLNAIVYEG  
LRMSYGVSHRLQRVSPDRITITYGKYALPPGTPIGMTSIHIHDNPTIFEDPRAFRPERWLPLETTGLHL  
QKYLVPFSKGSRSCLGMNLANAELRLGLAQVFLRFKSMRVVDTVRERDIDISRDGFNPLTAKESK  
GVFIMLDGKE\*

>CYP6103B1|5457|Dibbae1

MSRKDAHTTFNAISKELHHRKRKLLAKAFSSSSLPGYEPALVLQFGNLVRKLGGEATDAEPVTRKV  
FNVAHEFHCLMLDVMGNLCFGAAGFLENESNGVITSIQQRAKRILMTGHEPLFKRYKLDVLFPPH  
LFLANTALIKYAQTYALPRIQRHRNIDEKAALPIQKTSQGFLEHLISARDDSTTYSDVELLSESLML  
MLAGSETTATALTSTITHLLSSPSSLTLRAELSSTFPTYESLSPAATESCTYLACISEGMRLCPSVPSII  
PRIVGPGGLKLLNGTHFIPEGIHVGVPNFTLFRNEKYFSNPHAFIPERWIAGSSEPPFTESVKRATSA  
FCPFSVGPGRHCVGKTLAMKELSYVIAGFVYLFDFEMEAGEAVGGDVGLLGKGRHLLGMQGRVLLEQ  
RDVFTSVEEGVMVRVKVKVRKEMGTYM\*

>CYP660J1|5618|Dibbae1

MNSLTFLAAVA AVIVYNVYNYFFRSRPDPREPPMIPSSIPYIGHTINMLSGSKYFASLRCEKYPTLP  
VYALQFGTQRMVYVNSPSLLHSLERSKTIQFTPFVRIA AERLSNIRGRSLEQFDGSEKGEGLSVAEIK  
FTKHAILHSTEDLNLQMLAPLGDLLGEPLQDQGKPRKLFHWIKHAVTLASTKAAYGPLNPFDDPK  
VEAAFSEFESDAALLMLNIAPSITARRGCRARDIISNAFLKYLANGHEQGSVLAKVRHDGPLEFGL  
PEGDIARLEVSFLGALLSNTVPTAFWMLVNALSKPELVAELRIELDAIRTSKEEDKQTRHTIQVSHL  
KQNCPLLMYSIQEVLRLQSVLPNTRTVIADTLLNDQFLLRKGAIVQIPTSYIHRDTSTWGPTAREMD  
LRRFMPKGSNDGKGGMKEEEFVKPAQTMRTFGGAPHICPGRHFATTEILCTVALMVLRYDIEPVG  
GKWWIPGWIESMFSSVAPPKEDVEVVIREREGWHGIWDFEMGDPKIRFQLALA\*

>CYP613C7|5651|Dibbae1

MTPEVVLTDSEQLKAVFRDSKHKVAVNNNSGYLMSQILGQCVGLISHQSWRDVRAIVEKPFLRTS  
TSNHFSLIWNRTQAFDLKLCASRLPKGLVHPAEDLKLPPFWIVAEIYGELTPAMEASLIELVPLRED  
LFKHVIAGGLSRFSWFKHLPTTGNFLLREFQKKWSIFNEQAYKHAVSLQNDAPIIEMFQAVKDKKIT  
LQQLYQTIDEMLYANLDVTLGGISWNLVFLAANNDVQARLRAEASQWHIQVLADSSAASQYYLD  
SSSYLAACIYESSRLRPLAAFSVPQAIPARTISGYTFPAGTNFIVDAYALNVRNPFWGPDRATAYRPER  
FLERNATEMRYHFWRFQGFGRQCMGKYVADLILRVLLAQLVQGYELALLDGMKEDWARNGEMW  
ISHPSMDLRCKKRENPKSEE\*



>CYP51181A1|5661|Dibbae1

MTRLLSGRPSRYVSELNGLKIAALLPHWIPFVGHGLWFALEFPEKCLKHVVDVTRDGMFSLSMAGYTH  
SIIVTPSLAKSLLQQKLVNNHSLVWYLIDNFHGLIAPEVHQIDPSIIFKEIHSVHHILMKESYLEKVM  
SQVKAATHVADLVSFDEKHFRHRMWQDGGDGKLVKDDPYSMELSLFPLIRNFVSLTTPILMGT  
DFMRNFPYTVEDLWEFDAGMLFFLLKMPSWIPSKKNRNAHAARARILSSMIEFFTAMEHVLDGYD  
PGPRWQNLKDVSELMWERCKTWKRNGVPPPEHYAGGEIALLWAFNINSPNVVFWLLIRICSNPNIL  
GRVRNEIAPFASPTHNLNNTKDSFYACNLNIQGIDKHCHFFTACEYECFRMDIGTSSIRTAQADQFV  
ESAADTFDQALPQSYLIRKGEVIHVNDLLQKDARYFPDPGRFIPERFLAEEEEIQSGNNGNDEGTGEK  
NKVLVAKRGIIRPFAGPNMVCVGQKFAEREILLFVAGLLIAWEFSPVGGEWILPGHKRTAGAYMPD  
RDFRVKVKRRRE\*

>CYP504A48|5678|Dibbae1

MALSYQTIGFATVAVLYFLIKYFNRTDVPKIKNLPEVPGVPIFGSLLQLGQDHARVAGEWVKKYGP  
VFQVRMGNKRIIFANTFDSVKYLWINNQSALISRPTLHTFHKVVSTSQGFTIGTSPWDESCRKRKA  
AATALNRPAVQSYMPIIDLEVNESIKELLADSKNGEIDVDPNPYFSRYALNTSLTLNYGVRIDGTVD  
NELLNEIFHVERIISNLRSTSNWQDYIPLMRLWPSRNQQAQEQYRARRDKYLKTLTLLDMLKDKMAK  
GEDKPCITGNILKDPEAKLNEDEIKSICLTMVSAGLDTVPGNLIMGIGYLSSPHGQEIQARAYSEIMK  
VYPEGDAWDKCLGEEKVPYITALVKEILRFWTVIPMCLPRTSIKDIQWEGATIPAGTSFYMNAAWAA  
DYDETHFKSPFKDPERYLTSTEGTPHYAYGAGSRMCAGAHLANRELYTAFIRIISAFEIVEAQNPGD  
RPILDALECSANKTSLTTEPKPKFVGFRVRDQGKLTWHLHAH\*

>CYP5090F1|5962|Dibbae1

MLLFKPGEYLLTDNVLTSAQENVWLIVTGLFFTSWGLWRLWKFTILPRVYPDDPKELPYWIPGHGIS  
FFNNSNHLLDYAKDYFRNAREPFAITAAGSKLYILTNSKDVGIAYKNTSTLSFERFVQAMMRTSGSS  
EDVVSCKMYQVPDPEKAKFPNPNNKPLAKLARELHIFQLFPGEPLNSLCSAFVEYFKQTLTLKTMSTRY  
RYTKSFSDDQDVVIPLYTWVSDVFSAGQEAYFGRVLGQVEPELTWAFLEFDDLTWQVLYQYPKFLA  
NTMIRAKSKVIAGLERYFTLPPDKRTGASWFTPAMEIEMRNLGFDTHEVAVMMMTIYWGINNTNR  
RACFWMLAYMIFHPELLQTIREETKPAFVGENFQTPDIKYLEEKCPRLNGVWDETURLSAYSSSVRY  
VTEDTIIGGKILRKGNRMIPNRQLHFDENVFGDRVREFNSTRFIENDALIRSGSWRPFGGGATMCP  
GRFIAKHSTIAFVAMMLQRFDVEPAVKQSFPRLEEGNPVLGIMSTKDGDDLSIRLKIRVQKA\*

>CYP6415B1|5993|Dibbae1

MSTSYIANSVNSSGLPSWQWQLSSYVSQQQADLPMMGSRLLALVFASVLLLVYVSSPLNFWMGLYL  
KKGQQTPLTLPYALPVFGHVLWYSWDTQSFALMAKRNFQEFVKLRLLVMNPVLITKAEDVVHVF  
AQSAAFNTKPYRNFVSSTFGLPRKFSEFYIADDSGWRHKAHPQSCVKPENRVDYLMHNFITRFFSGT  
SLIAFTGRFTINMTNRLNTGFGDEWAEGMDLKFKLKTQIFHAFVEAVFGTHIFELNPDLCDDFWA  
FDSKVPDLAKGIPKWLSPNMYGVRDRCLQSILKWHLHLQKHGQEETTTINKKYDPVFGSELMQQR  
HQAFSNMSSDIVCAQAKASEDLALMWATNANAAHSAFWVIYQILRDPQVLARFLQCIKSAELAP  
NPASAPGILKQYRVDALCSSPYLSSVFAETLRIHVANMLLRDPLWDDFYVREWRVPRRTVISIMSYN  
MQHDEKAYNTGTPQDNHPINEFWAERFLVLAPEQSTGALSHAVQTPEENADSTNEAWVESAPAH  
MQPSDEGAPKTVFSTVGLKGNWIPFGGGAHICPGRNVAKQEILLTAAMLLGNFEIELTGPPPVAD  
WRFFGAGALGVIGKQECRIRRRRH\*

>CYP6828B1|5997|Dibbae1

MRFGTKYHLRISKRFPLPIYTLVGLRRVYVNVQVDLAAEIQRKSKIFSFDPLIVVAGQNLAGTSEAG  
MDIITRSLRDRDSKRGFLHDMYHRLHSMGLPGPALDEMRTLMSGNLSLCLDAIKPEGEVLPLYGWI  
KHMIAMVSTDAMYGPMNPFRNLNPKIEKAFWDYESKLPVFLNNAWPRIASRAYHARELFTNAFAD  
YFENDGWATASGLIRASYQTNSKHGISNKDQGGFELTTCIGLIVNTAPTIFWLVLTFISHQSLLEELR  
KELTAIATPMNGSDNLNGMELSLFRLKNDGPLLHSTLREVLRQRTHSQSPPRVMMEDTELGGRYLRLK  
GSIVQIPSSILHSDVTIWGPDASSLNTRRFLKTEPRSKKDGAAFRAFGGGVTLCPRHFATIEIIVMAL  
LILQFDLSPESARSGWVLPGEDGSKITTSVLHPMEETRVFISRRKNCENVRWKVVLA\*

>CYP6264A2|6712|Dibbae1

MEGLKQKIIASPPSMIGGIEEKLLSWPVLA AIPFLWIFLNGIYRLYFHPLAKFPGPKLAALTLWYETYY  
DVWQRGKYVYKIEEMHKKYGKIVRINPHEVHIDDPDFYHKFYQSSRKLKKYPWYYKVSQVDEVSF  
GTEDHEVHRQRIGVYKDLFSIRSIVLFDPIKTNIQKLCDKLDQHVELRTPINLSHAYRVLTSDTITTYI  
GLGPAPLLDDEDLGKSYRRYARIVTESSVLVRHFPLAYYFRFLPHRLVANLSSDFGILKDHLDRLRTQ  
VELACTQYEKQPDTPHSTMIKGIIGNERHSNKTIQEITEEALILEGAGTDSTGQALEAATVYILSTPGV  
AGRLREELEKAIPEPDQIPTFPKLREIPYLTAVINENLRVCSPASSRFRFNEHAVTQYKEWEIPASIPIS  
MNIWNTHYNPSIFPNPAEFCPERWLQPPSKDLEKYLVPFGSGSRMCIGMNLSLAEQYLVLATVFRRY  
KLNLYETSKRDVQMTSSCLITLCPPEKGVVETLEKL\*

>CYP5130A2|6713|Dibbae1

MHEKYGDVVRVAPDEVSFIRSEAWSDIYGHKGAKSFIRDPKWYANLREGQDDIIVSNEFDHSRFRK  
AFSAPFSDKALKENEPVIKANIDLLIERLYGQMKTNDGVADMMKWYNWTTFDVIGDLVYGEFPGC  
LQNSEFHPWLAIVLQNIRLSSYVALMERYPLFKKLIMNLIPRSLLEKRNMHIGIIREKCARRNESKPN  
RKDAISQISESDASLSQRELEANLALITMAGSETSATALSAATYYLTRNKEAAQKLREQVERSAFTKES  
GISWDVVKDLPYLTAVIKEALRLYPPTVGLPRRVISSGEMVCGYYIPKNTVVYITQYSAYRSPTNFH  
LPNAFHPERWLPVHGPKIPEDPNPFAADNLPVVQPFIIQPYSCIGKSLAYMEIGLVLARMVWNFEW  
ELVADGKGCGFEEKVVYALWQKSGLVVRLRGEGGGVRV\*

>CYP51202A1|6905|Dibbae1

MTRVYKSGTKFDKDADWYSNPFENGSHITIPDLKTAKQRKDMFQPYFSKAAAILRVEPLLKESTRSFL  
DALKRAASEERVVDLTFGFRCLTADIIMDYCYQKPFGALKAVSFEPFLIVALDKYSQAGQWDKYFL  
HVFRVIAAILNSIPPNLAKLILPPMSSIQWMQKVKECGTQIHALKQRAKSSAHSSYPTIFDTMLHPSS  
SKNQYTPSDADSTAEAVLMLAAGMDTSATTVLGTWYVISDKRVYQKLDELCRAMPKKDKIYDL  
AVLENLPYLRGVVKESRLSYGAPGRLPRVPAVGARFCGWDVPPGTIVSQSSVYHAHERVFKDA  
AKFKPERWLGDDYAELDKHMFVSFRSGRGLGKIKFSLTFSSLAYAELYLTF AHLFRNFELSPCRRTA  
ADMGWGDYFITVTRGHLKVTLREAEQQRADLSKVT\*

>CYP65FR1|6956|Dibbae1

MILQTEDLEAYVLSLGGGLLVLSLAGFLAWLSTVIYSIYFHPLSRFPGRSAAASYLPYSFHLVEGTFT  
TWVKELHNDRYKCDVIRIGPNHLSFISPSAWKDILGGSGSRSEKDVAVYGRSPNGVESLLQAPRADH  
SRMRRVLDHAFSMKAVRQQDPHILQTVNTLIGGLKDQVSGDAVGKVDLVRWYSWMSFDLIGDLAF  
GESFHCLEDKGNHPWVQMIFGNLKGFMNACSRFP AFASILPWLIIPSVKRMIDHFKQTQDKLS  
RRIAKGASRSDFLTPILENNSAKALTKDEIDSNASLFIIAGSDSVGTSVAGATWYLLENPKVMDRLRR  
EIDETFSKEEDITTQSV DGLPYLCAVVQELFRIYPVALAGQASVVPHEGAVISGHWIPGKTGVSMNQ  
FAVYRSKTNFQDPDVPDPERWLDEPEYGWDRKDAFHFPFSIGPRNCIGRNLGLAATRLVLAKMVW  
HFDMLKSGETDPNWLHQKSYIVWQKKPLLVELAPRASAKAKKEDNGIALKKEGGKAGLTDAEVM  
PAPAVTNTNPVIEGKREDGIPEATTETVLGSALENRRSEVKNGKAL\*

>CYP51200B1|7063|Dibbae1

MSPNLLVCGTAAIAGVVSHLTYFIHGEHNNQSPLYFKLLLAGIALIFASEFLLGVGTIMGSVANTACI  
VSAYLVPITYSMLIYRIFFHPLRKFPFMYKVTKLWHVLKLIKRNCHVLEDLHQQYGEFVRTGP  
NELTIFNTDGMALHNTASNFPKAPWYDILLPEIAMSTARDKAVHDQRRRIWDHGFSGIKGRVTGY  
AQILESQIGKRAGQGVNISEWFNWAYCDVMGDLAFGKPFDLLATGQNQADVLLKKGTPVVGLF  
TPTPWLFILLAKMPGPNREWKEQKWCYAQLERRLSKVDVDPDIMSWLIEASEAQNRLESDMHLL  
RGDSALILAGSDTAGAGLSSLFYHIIEPKYLVALREELRTIPSLTDVKALEGLPLLNGIVHETLRMHP  
PTPSGVLRTIPKGGATIGTTTFVPGDVTVAVPFMSLGRSEKCFVQANEFIPERWYSKPELIKDKLGYVP  
FSIGQYSCVGKNLALMEMRSVTALLVAKYDIKFAPSQLAKQTSFELGLHDHFTSTAAGLDLIFTPLE  
KQPTNVK\*

>CYP682BA1|7152|Dibbae1

MGFLETITSIWFGPSIVLLYTIYGIYRLYLSVAKFPGRKLAALTFWYEFYYDVVKRGEYVWEIQKMH  
EEYGPVIRINPYELHVNDPSFMPTLYPNGAKNVEKWSWSAGMFGSTGMAFSTVNHDHLHRLRSSAF  
RNFFSKQSIREYEPTISQLISNLCQGLERHQRNGEVVNLVDAYSALTHDVITEYCFADCSNWLLQPD  
FCKEGIDNVTKPAESTHLIKQFPLMLPTVDLLPNWLVLGLAHPLALQLRRNRASYEVQVDNILRGID  
KPLTGSHTPTIFHSLRDDPNLPPAEKTKRRLAMEAQSLIGAGSVSTAHVLALTTYQILSNPSVLSRLLSE  
LEAAIPDPNVIAPIVELENLPFLTAVIYEGLRLGPGISHRLQRVHPDKSLTYGKYTIPPGTPIGMTSVFT

HHNASIFPDPETFPNDRWLPLDDNKDIFKYIFSFGKGTRQCVGQNLAYAEFYCTLATIFRKYGRNIT  
LYDTEWHRDVEVRKDFVFTSPSLESRGVRVLIGGAKRGE\*

>CYP544C4|7403|Dibbae1

MIGIVVSLLLLVALWFLQGQRSEIRRDGKRLPRPPGTLPLAGNGIWFLQPRHKLLDWFAEVQPKVG  
FGTFEISVPSLPPAIVVNDPRSVEHVLKNNELFIKGDFFRSRSWDLFGNGIINADGALWKIQRKAGLR  
FFSNANLKSFIDEVLPPIIEDTKKFLDKAAKEESLIDLQDVLELTTRLMGKVAYDVSQRTGFNLMDI  
DGSMPFSRSFDFASGQITARFMNPFWKAKEVFFGAKLKKAVA EVKTFGRKIVAAAVAKRGEKPIAG  
QGVFKSEDDPLKNNLINALLDHIEDHQMVAADAMNFLSAGRDTTAQSLTWTIFYSLMRHPSVLPQI  
RQELVTIFSPEISSPLSYDAVQSTSLPYTMSVFNETIRLYPAVPFEIKENTSPTTFPDGTIYPAGSVVW  
VPWAMARSTQIWGPDAPSYRPERWILPDGTLLNKTAYEFPVFNAGPRTCLGKKMAECLAVYVIAA  
LVWEYDFVEVRDPKLGCGWGAGRERKSQDSLTPMEGGLPCWVKRTR\*

>CYP6798A2|7580|Dibbae1

MNSSLLDDDLGFYHIEPLQDTQLIPPVKSSFERWLPVLFGLGMIAAWEVKRMILVFRNRCPENVTIA  
GVDSIIGKWLTSIRYCWVSQSVHNKAYAEGSGKPYAIPTRSRVQVCVSSQKLVEELSNASIHQISLRD  
ALWELSQRAPFEQTIDGLKVDGLDQNGSLSQKVFRHHARLHLPQLPLYEKRLEEAFVREVDNQK  
KKDGIWQVSAGRAIHRTAKINNILLVDELASDPVFFENVFLPLTGWILMKATGVTQNVKRYIVA  
LAKQRLNNKSAKGEEKDALQWIIDSQKKGTAEDVAQQTLAYIFGSAYQMPMLISFAMYNLCKHP  
EYLQPLREEIERSGGVILNHQNDEMPLMDSFLKETARMNPVTIFGMPRKVMKPFTFSDGTHVPANN  
WICVPQQRMMKDPANYPDPDTFNGFRFVKEKGEDAVTVSESRLSHPSWRFPFWGSVKQACPARFY  
VTDMTKMIISQFIMNYDFKLADENVPDSFAWGVLRVPHPLAFLKKRETY\*

>CYP6466A2|7584|Dibbae1

MPGGKVYVINSPLAIAVERIPTKISFWHVEAVFTGTLAGLSPFAVKTLKENVNSDNGEPSYLREGM  
VSVHTTMKPGEGTLAATRAAADLLVPSIGKLAQRSATQIELGQWVTDELMA SVTGSIFGPKNPYQD  
PDVAKGFWDFQDNAGGLMSLPYPSVTCAKSYAAREKVATAFKKYDARGYDSASPWWQYSTKVS  
DKYGISDTDKARIDVSNHAILANTTPTAFWTIYHIFSDASVVDEVRAA VIPFLTTLKLDGSVTYDIDI  
SQIRDVPILKSVLSEAMRHYASGTGTRIVVEDTMLDNRYLLKKDSFVFLPNRSYHFNSSAWGSTVEG  
FDARRFMKSKTPRGSFRAFGGGANLCPGRFFAMSEILAMAAMLALRYDIKPVAGTWVHPGVDDS  
NMTLIVHPPKEKVLVKVVPREGWNCGEWSFTVK\*

>CYP6615B1|7746|Dibbae1

MSVVFNGVLLAGSLIFIRICYLLLLHPLARYPGPFWAKLTYFWSAVTRVLRVRSFLKGEQHNVDLQL  
HQRYGKFVRDGPDSLLISDIEAFKAVYGFTGAVEKGDYRIMSNGKPHDPNVFAARTEVLHREAKR  
KLVSTAHIAQYDESITKNATAFRQKIHEAVKNRGAGRSINIAPYIERVYFDDAVLEVVFSGSNMGFIEA  
NHDKYGLLAQKKVKRWPFITITISSVPWLARFMSQPRIGAYFRKPRLDKDGQPIGLTAAGFFARSAYS  
AATSGTPTPSILKCLSEVPPSDNRRLSKEMIFSETFNAIFAGTGSTTGALTAVVYELARHPQLSELY  
KSLVSSRGSDPSDSSSFPYSALKEISVLQALIRESLRLHPPQSGPFERVIPPSSTPTTIPNIPTLPPGTRL  
WSSQYVILRSREIFGDDADEFRVERWLPGEGGPQKREAVKKMEDIWNVFGSGSRTCLGRDVTWSVI  
EKGIAALLNYEMSGKEEGLKVKNAFEMQYEELSVVFMPRV\*

>CYP5527B1|8142|Dibbae1

MIIDIYGLKPNKRQLAKDRATYDDNEGNIIRLLTPLVFSLYTADFEANDADHARMRKLSSHAFSDA  
ALREQESLMSSYFDLLVDRLKTEIDGPSQGIVDLVQWYAFTAFDIIGDLTFGESFGALERGEYHPWIG  
NIYKGLKFLRFTIIANHYPLIRQLLSLLSKLPALANVRNAHYGFSTARAMQRLNRKTDKDIITYVLR  
HNGERGMTRDEIVSNSSILIMAGSDTSKCLSGATFHLLKNPEILRRAQEEVRSFASNGRDINLVSG  
QLRYLPAVLNESLRVYPPAPGTFYRRTPGQGDVIDGKYVAANMAVGVHQWSANRSRKNFADPESF  
IPERWLESPPKEYQNDKREAMQAFSYGPRNCLGQNLAYAEMRSILARILFHFDLELCRESENWDDQ  
DVFFLWNKPPLIVKLTLRS\*

>CYP548AJ6|8150|Dibbae1

MLFLPNLVFTLWRGFVLLIFVCVYRLYFHPLAKYPGPWLAKITDLYGVYHTARGQYHIVRDNAHK  
QWGALIRLGPGLVINRATALHVTYEKDIYQSKDVQKSSGYKLLAPEKDGYSTLTVIDKSIHKHKRK  
ILDYAFSQQSMRSFEPALLSLVDIFVACLTKSCTSHGGDNAWSSPINMTDATNYLAYDTMGKFGFG  
RSFEMQLEEHNRFLIDCVKAVTFRAGIYTIYPKLASLKLEKLLSKRVASMYKKYLEMSDLVRSRLTI  
GFKTDEHDLFSFLITAKDGETGQICTETELWRESRMLLVAGTETSSTALTALFFYLSRYPISYTKLATEI

RQTFTHGSEIQSGPKLSSCRYLRACIDEALRMSPPLSLVPYREVSSSGTAGGGIHIEGEYIPPGIEFGVS  
IYSLHHNAEYFPAPHTFSPERWIESSNPAAIERARYAFSPFSIGSRACAGRNLAYMEIGLAIKTM  
WYADFRPAAGPLGVVGEQPDQPDGWNRVKEFQIREHLTSQHDGPWLEFRRREEVWGEDGGPS  
QKGSKDAVRSI\*

>CYP65FQ1|8543|Dibbae1

MEFRPPDQKSLLLAIVVLPILGLSYLLSKVIYNLYFHPLRHYPGPKLLAATRLPYVRWMYKGTLAHN  
FRALHEIYGSVVRTAPNELSYTDPAAWKTIYGFHQPAEGFLKNPMFNPPATNGYHSILTAEGKDHA  
RMKRVLTAFSDKALREQDILQHFTDLLIRRIHECLDGNPGPVNLFWFNWTTFDLIGDLSFGEPF  
NCLQEAKFSEWVALVYYAFKTITFINISKCMAPLKDIVKLLIPRSLVTKRNKIFNMNSSKVDRLVSN  
TPRHDFMSYILKHNDKYGMSDGEIYANATLMVLAGESESTATVISGMCFFLMKNPEVMRKAVEEIR  
GTFKSESEIDFETVRQLKYLAAMVSEALRMYPFPEGLPRMAPRDGAEICGRFVPGGTLVQISQWA  
MHRGSYNFVDSDFVPERWLGDPDYDGYKEASQPFVSGPRSCIGRNLAYLEMRLIAVRMLWNFD  
MELCPESYEWKQESWVQWDKKPLMVKLTPVARYEELNTPQTPSTVVA\*

>CYP5238F1|8618|Dibbae1

MEGQLVQYLLGFVAISGLVFIIKYLLLLTRLPNAPGATFWESQPWVGRKKQMFSQLRASFRSVKHS  
QSMVDEGYAKFSKSNRHVLPMSGSTSVIIPPLQLHTILNKPENEIEAMDSQNETLQASYTIQDKEIY  
VNSIHFNVVNKQLTRDIPSFIESIAEELALGFQRYWGTSTEWKTVGAWDTCQKIVARTANRVFLGTT  
LCRNEVFLDHSRKYALSVFGGGIVINTTPSILKPILGFLIGLEANRHLAVCKKILIPVVEERLKNTIQLS  
NDPDFKWTPPYDALQWIIIECEKTDDPKQFNPAIAHRLMMLNLVSVHTTSNTLINVILDLYSSPPS  
SGFIDGLYEECTRVLADSDGVWTKHAVSQLFRVDSTIRESMRFSAFGIVALPRRVNSLNGLELDDKSI  
LPKGVRLTFPMQAIHQDEDFYPNALNFDARFRSPYETKRADLNRFESGDTITDTFLAFGNRHA  
CPGRFFAMHEMKLMLAHVVLNVEVEFMPTRPPMEHLMELKYPATQIRVRRKA\*

>CYP6677B1|8715|Dibbae1

MVVADADAVNTMLANKKDFIKGGAMYDPLNVFGPNAVSANGREWQRHRKITAPAFNERVSLSV  
WTEASRQAEDMVASWIQKGATGTTATVHDTALLALHVLAYAGFGIQYSFFEGTHSPREGHNMSY  
RDALSLVLGNMILIALFSKLLQSLWLPGLKREIGAATAEFQEYMEEMLINERRVISRGERASGNLVS  
NLIRASEETSEGLTDEEYGNIFVYNLAGHESTANTIAFSIVLLAAYPKWQDWIGEEINAVMREEPGY  
QTAFPKLRCLAVMLETLRLYAPTFFIPRYTPVQAPIQTLPINGTLRAVLGNTSVTINIQAHTDPKT  
WGSDVLLWRPDRWIVSDPLNPCLDTETFYEPKGTFPVWSEGPRDCPGRKFAQVEFVAVMATLFSK  
RRVRPAARTGGDAELKEERNAKWRTGRKTGVGGSYLVGRKVP\*

>CYP677J3|9120|Dibbae1

MFFGLSLIQTIVLAVFIYLVSWIYCRCFHLRSLIPGPFLASISRAWIVFKTAHGDMMERTQRTLHKKHG  
YLVRAPNEVACSDPEAIKTIYGTKIIFTKVLIRRSSSKQSSLQQTDDYDAWAPPHGTGYVGHFSPRDEK  
EHSERRRIVNNIYSMSSVLECEKAIDSCTQVFCETMRDFAKQKSLMNESLSPKMTGQRAYLSSRYA  
FDVLGELFYGKMFSGMSERTDVGNIIKAIDSLPAFSIGGTVPSTYTKLFLASTILFSPSVRGALGAIK  
HLESASKSAVQRRKKEVEENKDNKRDMIRKMLEINADRGEKINFTYQDIHVESHSSLFAGADTTAI  
AINSILYHLMHNPAAYERLTAEVDAAVTDGTLSPAAAYAEAIKLPYLKACINEGMRLHPSVGLTM  
PRIIPAGGASISGFHFPEGYRVGVNGAVVHYDKDVFSGDADNFNPNRWIEGNAIRMDKTMIQFGA  
GPRTCIGKNISLSEIYKLVQIIRDFHHLVDPSKEWKTQNYWFNKQTGIYIYEERTHRPNK\*

>CYP680F1|9312|Dibbae1

MAGFSASLLLYLPAAILIYLTTHVYRRFLHPLSKIPGPSWAAITYLYAFRYNVIGPGSRFYLQIEKLHK  
QYGPVVRIGPNEIHLSDPENYEKIYYVGSKFWDPIFYGGLGLSTSAFGTPSNELHRMRRALQPLFT  
RKQVLELEDVQSKVGLLVQRMDDQDLDESRLVLDHGHFRAISVDVVDYAFDNCYDLLKSPDLGR  
WFCSMIRDLAPRIWILQQFPFVLPLSKSIPPALARKMSTNLATFLVVKDNCENEIRTIKKRVEASEKM  
PAKKTIFHQLLSPDATEGHVVPVDDLIDEAFTFIGAATDTTGGALAVAAHVSNSNPDIYQSLVAEL  
KEAFDPKAKLDFQTLERLPYLASKSLPLKSFCVDRETDCGNQRRPSTRLSFGVPGRLPRVTPEGGA  
TFNGYFVAAGTVVGMSSWMMHRDPSIFSPETFNPDRTWNPATTGQLEKYLVAFGKGGRRQCLGM  
ALAYSELYITLGTIFRRFENLKACEMSTQDWEFDDFFGLYIPESATKFHVNS\*

>CYP541B12|9390|Dibbae1

MPKPIPKPGVPLGNIFDIDPSNTWVSLKKLADKYGPIFKINALGTQIVFVGSASILEEICDQTRFRK  
CVTGPVVEIRQAVHDLFTAYDSEPMWGIAHRIMAPLLTPAAVQTTFVEMRDTVAELVAKWTNN

KADGGAKQQRVNVNLNDLQRTDLQTNMLCMFGQKVSYLEGPEPAVIKGMHDSTMEAMKRPTRPKL  
VNWLLYQGVFDRNIKIMRDFAAEVLAYRKAHPTPARNDLLNALINSKDPETGKSFTQQIIDEIVTP  
LIGSSTSPCLMSFAIYYLIQNPKEVTKAREEIDAVIGPAGSQLELSHSELKYCEAILRESRLSAAAPG  
FNIEPLPSAKGTVQLAGGEYEIPPNQVMIAILSAVNRDPTVFDDPLVFKPERMLGEAYDKLPSSVKK  
GFGNGKRECIGKNYAWQWSFVVLVMILRSVDLEMADPGYQLREQGAFNMETQGFFALAGPRK\*

>CYP682BC1|9712|Dibbae1

MPFLHFPAFQKLIHNLRYEFYYDVFPYSGQYTFKLREFHEKYGPVIRINPYELHINDATYYNTIYAAG  
GSGEKRDKWQWYSKIFGAPGSMFETPGHDLHRARREPLGRYFSLASVRRQLQVIERVKNLIGRFRE  
SINSGEVFKIHAFAAFTNDVMEYSFGCSDRRVDAPDFSPWFMEAVVAAQKSTPLMKHMIWIFH  
VIQMLPDSFGKRFPKLMQLVDLQRSIRAQVVKAKAQEKPTHYNSGHPNIFHELLQSDLPEEEKTV  
DRITDEAFILTGAGTGTTAWCLGVATFHLLSNPQILTRLKKDLKAAIPDTNVDPPPLVLEQIPYLVAI  
VQEALRLSYGVSSRIERISPDKALTYTEPSGKTWSIPAGTPLAMTSVLIHHNEAIFPNNRSFVPERWIE  
DPRLDRLVSVFSKGSRACLGINLALSEIYICLAALFRRFGSEEVRRDDGDEGYLELFETTLEDVEISEDLF  
LPFPSRSSQGIRIKIRR\*

>CYP5089D1|9723|Dibbae1

MGGNSHIVEQDLHKKYGHVVRIAPNTLTFSDLPSEAIYSFNKFLEKGDWFNFGREGPNEAGNIFT  
ARTNACHKDRKRKVFGALTNAKVATYKPTISKNVSNLILRLNELRAASEDKSTIDIAETIHRYTVD  
NQVDIVYGQSVCPVAFDWPARGVIGSFESSRLIWGILLPILGKIMRLSAVTSALRRPTHASGN  
ETGIGSLVSAAQKVVRSEPEKITEVGEPCILRYFLDVKESDSKYQEPDQVLRESVNLMFAGQGSQAA  
ALTATLYYLAIPIGHQWQRWILADQNSEADMPLAASSILMAVMKETVRLHAPIPTGFPRTIMPGAE  
TAIPGLPAPLPTGTDVQTNPYVLSRSKEIWGEDAEWKPQRWL VETDAERKELDEKFVTFGKGPR  
CIGKEMAWIVIAKAVTAILQQWKISAEERTMKGANYLEMHYHTCKISFVER\*

>CYP6456B1|9728|Dibbae1

MLSGKVYVVTSPDLVAAVNRNSKALAFNPFAAVGKRITGHDEVTSQIVQHNLNGENGPYVIEIH  
DGTVAALVPGKTLEDMMPEPMFWGVSSHLELERSSEVGLFTWMRKMVTMCSTRAIYGPESPFEKN  
PKYSDLFWDFDRDLNLLIVDIFPSIVAPKGNRARSILAEAFEKYFADYVPGVTQSSAMIHSRHAVNT  
KWGLTMLEQGRLEVGVLLGILANTIPSSFYLLVHVYADQELLQQRNELETHCVLKSPSETKRSISLM  
NVREKCHLLHAASQEMLRIHAQGANSRYVREDTMLDNRYLLKGMVVQLPMAVMHSDASIWGS  
DVNDFQPRRFLRQNDASTKKSGASSVEEGNKSQSTAYRPFGGGSSMCPGRHFVTVLEVMVLTAYV  
VLQFDMVPTSGPWHIPAQKQESMATNVFPPEKDIRVRATRRKGYEDVKWDFVIR\*

>CYP59V1|9977|Dibbae1

MALHIFNVSYGRLGYTVAVVSICIVARFLVNLYKVRGRIWRLKKQGLPMPYPYHPIFGHLLLEVGDYIS  
SIPPDAAHPLYLPDQLRRKYPNMGPVFYVDMWPFAPFLFTDSTATASQLMQEHPQMKADDIRRFM  
YPLTKLNDLVSSEGQLWKDWRNALSPAFSANNLISLLPQILEAVSTYVDVLGENAQSQDTFSLENA  
AINMTMEVIGTVTMGFRFDSQKSNRDFASALREQILWLTVKLNPFDAYNPRIPLFIAYYNSIMDSFLS  
LQIDKRFAALQRLNDVDGAEDKKNTVLGLAFDKYKKTRKLRNPTNVLTSFEKFHFVMGQLKGLILA  
GHGTTANTMCFIYYLLSKHPKALQRVREEHDNVLGHVDSQTASIILEKPHILNQLPYTLAIKETLRL  
YPADSSPRSGSKDFLLRENGRLFPTEGCSVTITHAIHRDPLYWPDRDAFIPERWLVAADDPLHPVK  
GAWRPFEGPRSCIGQELAMLELRLSLVMAIRKFDPEPRFEWEQKNGVKGPRMVNGEIGYQTLDG  
TNRPRNGFPCKVSWRY\*

>CYP682BF1|9997|Dibbae1

MAFLEAFSVGRVTLLLIISWLSWSICLAIYRVYFSPLARFPGPKLSAATYWYEFYFDCIQHGRFSWEIE  
RMHDVYGPIVRINPDEIHIRDADWHDEIYTGSTPRNKCYFFVGRIGRGSIFGSITDEQHRLRRQAIN  
PFFSKRSIVNIEPQIQEKVDKLCRRLEHAGNGEPLDLGACYALTLDVITHYAYGQPLGLEMPDF  
GSNWREMIQMTLECMPFVRHFPWLMDVLEKIPYKLARRFNAAVALMLHFQHQIRTQIVTTLQRG  
HSTPEHKSHKTIFEELRDSLPASEKSIDRLKEEGFVLTAADATSMTLTVLSYHLLSNPSILARVRA  
ELHSAQPDPTIPIPWQTLEHLPLFRACITEGLRISALSTSRLRSAPHEALRYKDWVIPQNTFVSMTSH  
FIHMSPEYYTAPFTFDPRWLNADRQATRPKLDYFVFPFGRGSRSCIGQNLALAEVYLGVASVRR  
VSLRLFETTRDVRVVRDAFVGYPVESSKGVRLVVGGVVGHGDGDVEMEKQVLNH\*

>CYP6178B1|10011|Dibbae1

MHHSQALFSRGHSHFPGREPYALTIAGQKIVVIQTTEEVS TLWKQTVIFTFEPFVQNMKAFGDHTS  
IEAMFHEDPGQLLPISVRHSALLSISNPKRKC YFKMQSEWLKHQLHPGENGNLKW LQDKYAHFLS  
KSISWDELSSEFVISANA KEKLISLKRFRQTLGDCAMKSFFG TKLFENS PSLSSYQQFEDDSWKVFF  
NYPRFMAKDLHRIKDKALDDLVTYFALPTEQRPGLAWIFQTL DSELKGLGINPRDRAGIVMMITW  
AINHNAHKISFWIFAHILYDPALLTDIRLETQKAFNKDGS LDLELLLT KCTHLD AVWYEV LRIYNNA  
AVARKATEDTIVSGKVIHAGETVFGPFRQFHLDAAIFGPGVSRFDPNRFLASKSLNHTKGYHPFGG  
GNTYCPGRFFARSEIYILVATALDRDLDEVALGQTLPEVDLKV PSSAMP AVKDVIVKIRPRGRH\*

>CYP62W1|10033|Dibbae1

MLTVALT TGRTVRIAPCEVS VSDLHSLKEINKIGGGFVKSEWYSSFA SEYEGVNGMFSTTDAKKHSE  
RRRHFAFAFAPQSIQEWEPFVQSKVQLTVSSIENLGQRGEVDILSWWSFMTSDVVT KLSFGESTGSLE  
SGQKSAFQRDL DITLIWRGLQSEMPWLTFILYKIPIPSLQYLIRSQDRLETYASEIIQQSKRLNNLKGT  
FGKVFE EYGTEKSLTDLEITLEAKAFI IAGTETTAITLTYFIWVMSKYPIIRQRLQKELDSLPGFTNQD  
VQNL PYPQMVLMEIFRLYTTVPSSLPRIVPKAGRQLGGYFIPEQTTISAQAFTIHRDPTIFLDPLTFNPE  
RWTFTPTQDMKDAMQHFGGGSRACIGKHLALMELNLGIAHFFRECPTVEMAPSTTDKSMDFVDSFL  
IKPKSGKCAVVIP\*

>CYP5070D5|10089|Dibbae1

MVFEPALIPMVLAAGLGSVVA AKTTSLDALTVFLYSLSGVLA FYLTYYSYIYPFYVSPLRHVPTVPGF  
PLWGQFFTIITEEIGVSQRRWHKQHGPVRYFFPFGSERLSIADDDALKHMTIRNPYNYPKPDRA RQ  
WMVRVLGEGVLLAEGDTHIHQRKALTPGFSISVIRTLMPVFWQKALLTNLWQREMMIENVNTKS  
FEVLEWLNRTTLDIIGQAGFGADLNSLEHPETPIREAYRLVFAFDIQSRILHGLAAFIPLTKYLP AKM  
NRDILKSRNIIISKATEIVKSKHTKANSKDKDIIALIVRDNMKMEAGDGDKLSFETMRDQVMTFLGA  
GHDTTATGVAWTLHLLSKHQDVQEKLR AEIKQYMPFLWDPKQRNDREVYGVKVDPDHLPYLDNV  
CRESLRYIPPIPMTVRQSVADDKLG YFIPKGTTIYIHANAIHRLPEFWGPTANEFDPDRWDHLPKD  
WSPNAYMTFLQGPRGCIGKKFAETEMKLLVVSLLSLFRFERDES VTDPELLKMWRLVLRPRDGILCK  
VTALEENVVG\*

>CYP51180A1|10243|Dibbae1

MKLNSYIAILVENVVDHSSNGDKGNRERYTDIPVRIKLFFLDIYIITGPEHITSIFRQSQT VFPGLSLVRR  
RTLHNIFGTSPNAGKIYDEDNSGSLSKPLPGTNVKPHNRVNYIHHHSLTKWLTGPGLKELAE RFSE  
NLIEQLRTTKELTTEWTELPDLLKFMQHELFYATSR AFLGDELFTLNPRLAEDVWEFDKGVPYLA K  
GIPRWAKPSVYRARDKAVQR FVSWHKWVRNYVEREGMPEDPQTIRKVFGNDFMKTRFEAFWK M  
DYMSSVVEGPASEDFMVTWGANANSVPAAFWFIFILHSPSLLSTVREQIKPCVSISSDSKLDIDIT AL  
CANPLLQSA YMEIMRLYISLTLIRDSEESDLCLNEWIIPKKSILIPGQSVHRSQKLWEGIGKAGTEESS  
PYPSVDTFCAERFLKYPEKGGEPFFSAENLTGYWIPYSGGSNICLG RYYAKQEII GAMAIMLTLFDIEI  
LGDENIGEPDAERIFGFGVMKPKRSVPVRMRRRQV\*

>CYP609P1|10265|Dibbae1

MTVFEIPDGIGGAFKIEWTQIMAVSVLFCVAGLSYLAGRQPQISPKAPPLINEGLPIFGAVRFWTERW  
DFFRWAQM QNPSGYFSFFIGNHPVVGLSGDEGRKVFFESKQFGLTEGYSVLFGMFPSTKVENKEGQ  
DTFHTTEFALHFKDRITRMVRKDRVEKTDTKARLDELVDNPTAIVDPFEAIYKLIYLLTMRTVGCNE  
LCRNRHKLDLSLGLYETVARCATIWPIVLPWFPSPNLIKRTIAGARLYFMLNKIVSRRMKSGICEDDP  
LQDMIDRGDEKSHIIGTIMGALFAAQQNSGINAAYVLVYLSCNPDWAAKARNEALTVARKYCPDE  
SLSMADRLAMVPVEAWESELPTIELCLRDSIRMHSLGACFRKNISGKDIDLGTGIIPNEYFASYHISNV  
HLNPEIYRDPEQWDP SRYLPDRAEDKKRPLAWLGGWAGRHPCLGMKFAKLEQNIVAAFFLTMFD  
FHLSDSKGNPVDSPPKLDKNAYSSWKPETPVFIKYTPRI\*

>CYP51166B1|10267|Dibbae1

MHYEAVPLHSAQA AIMNRLHSGVQFSNFLEQMAASPPRLTFYNAFLATLIFLTLKFAFTIIRLYLSPL  
AEFFPGKIAA VSRLYEFWYQG IKRTEFPDVIKEMHRVYGPVIRISPFELSINDSEFNAGLFLHDRKLDK  
DPWYYGLGFTESLFTLLNKDKHRQRQSHLAPSFSGAQFKNAEPIIEREVAKLLFVFEQNVKDSEGLN  
LSVAFRKMGN EILRSFLMGERGDSTAPVDYMKDADVAYHPVFKTMTYVRHFPIYKIHALIPNWFY  
DRWLPLAKYQRDADHDVRYLVQEHDKNVSKSEDDGLLYNFVELDPSYRKNNLQAAVEEFTALQ  
WGGREVLGHGLTNIAFHLSNPECMARIYSEL CNSNINISTASYAQLQTIPYLN AVCKEGLRTQLGG

GFRIPRTCSTPITYKSYTIPPNTPIISMCPKFFHDDEAIFPDHLAFKPERWLQGSEGEREALDKYWKPFG  
NGRSCIGMNLALLEVYRAVANIFLRYELSFHEGIDADFCRKDGMLKVFP HKNSRGLVVDVQER\*

>CYP682AT1|10284|Dibbae1

MSYGWLA FYAGLWLGWQLFVIVHRVFWSP LAKFPGPKLAAATVWYEFYYDVWSRGRFWLQIQDL  
HRKYVRISPYELHIDDPEFYDTVYNNTGKWDKYL PFAKQFHCPGSGFASIAHDKHRIRRELNRFFS  
RQAIDQQQPGLQKAVEKLCKRMQEWKGTGRPFPLKAAYSCFALDVVTSYFMPVSESFLDKPDFSPE  
TFQMTVAANEFANLARHFTWAFSMLVLPRRLCELISPAIAYQFQDFQITKTPEIFKAHTKAEAIVS  
AISSIRDHETGRTSHNKTSTLEESTEFKTQRTIIEQLLKSTNLPPEELSAQRLASEAQIVLGAGTDTTSYT  
LSVISFHLLNHPEMRARLKAELSVAMANSRDLTWQELEKLPYLVMSPYCNTIVSKYVTDKLQTAVI  
NEGFR\*

>CYP5168K1|10516|Dibbae1

MPGLCHPILCLSDDLGLLTLHATCPCDQTIGTLRQLHPARMALQHLLHSNWVDDGPSAVGQDQA  
GTKYPIHLPKRGHVAPPLRSTYTKFEILATQTMQDEATVFLEGVSTMQCSQQLAMVVVVGVASHLL  
WFIHGEHHMRTPAIFKVYATVTGVVFAVYAVYGPLEMFGAPKRHMIAHLIYFFSLYLAYFLSLFTSI  
IVYRIFFHRLRRFPGPPLAKVSKLWHVFKVLHKDNYVLL EEFKKYGDYVRTGPNELTVFDPDILQA  
IHGYGTKCTKTDFYDIFLPSDSVAITRNKDAHRWRRHVWQAAFTNTALNNYEGRVQVHVQNLD R  
KIEATR GKPFNITQYLEWFGFDVMGDL MFGKSFDLLTSGKQHYAVGMLQKGLDILGPLRPVPWFLI  
LLGSIPSLKADYNRLIAWTSASVRDRIDRKVA VPDLM SWLLSSF GKS EDPDQEV TYKLQYKDEEMH  
WLEGDALTA INAGSGTTSTTLVHIFSHLALHPDIVARLRKELMSIPPDQRSSNRGLTTLPLLNAVITES  
LRLDPPVPSGMYRLTPSTGLTLPNGTYLP GKTTIVAPPYNLQHLESCFPRPDEFIPERWISGQGGRPD  
LCLNKSAYAPFNLGSHTC LGKSLAWMELRAVTARLVMRYDLSLAPAMGGKGVGKMRDCFTAVP  
QGLEVIFTRREGEKEEN\*

>CYP6187B1|11009|Dibbae1

MLHSVFDVRGVLFWTGLLIVICSYFVT LAFYRLYLSPIAKFPGPKLAAVTYLYEIIYDVVKRGKYTFKI  
KDLHARYGPIIRISPTELHINDPDYYDTLYNREGKWDKNPFYTNSMGNGAAGFTTVDHNLHRLRR  
AAINSFFSKQKVTQLQPVIQRLTDKLCRKLEKIKEAE EVVPIECAFDAFTMDVITEYSLDTSFGYLDNP  
GWSSDFRELERAFGEMGYLQKLFPPLLDIMNSLPNWLLAMNPRVGLLQDFFRNCY AIAEKMLKE  
TDAKKYEEKEHPTIFYEIIHSTDLPAAE KTPKRLESEAASILGAGAVTTAWTLTVAMYHLTVNPQKL  
ERLRSEIRSIMPDPQNEPAKLQQLEQLPYLTCVIMESLR LSNGVSHRLARIA PDRSIYFRDWEIPRGTP  
VGMTSTLIHQTPDIFPQPF EFVPERWLPEDRKRLERYLV PFSRGTRQCAGINLAYAELYIMLSSLCT  
RLNLELYETTREDVDIYSDMLIAEPKRYVNGVRFKVKEIIVNPY\*

>CYP511A4|11068|Dibbae1

MAIVSFLQLEWNITRLVLVALGASLLYACTIVLYRLFLHPLRKIPGPWLAAATGWYEFYQDIILNGH  
YVKEYPKLHD RYGPIVRVSPGRVHVNDPEFFHEVYHSGTKYFKDPDFFQTAGGIKYSLPMLIDPDYH  
KQRRNMVKS LSFSTKAIDQLSPIVLGVVKNALGRAIASNENGSPLDIQRLYTGITVDTIMRVLFDKQL  
NLVESDEEPPFLATLRTFSENFFLTKHFPI LT LAVNIPDSWAHKLVPGYAQFRKQVAVWQIEIEEK  
HKKGIYSTADGRKTILDLLLKPD LSEGYQPLSKDILVDEAYSFCFAGTHTTSFSLSLGTYYLLRHPQKL  
RKLVEELKIVKRNP EGGLEYRDVCNLPYLTAVIRETLRLSSVPVGITPRKVPAGGVICCGHYLPEGTTV  
SISIRTVSDNPDIFPGPEKFIPERWLNSEAKEHWLVIFSKGPRACLG LNVAYLEIYLCLANFFSRLDMS  
LYQTDENTTRWVDYGNAMLQKNVKVTVDKVKY\*

>CYP5180F1|11116|Dibbae1

MLTKRKIFGFKHTLKNNVIELDPSDQTNATLRYRLFARSIRINGVAQISRLQKHLQLRLDRTC REYLD  
AQISGEWTTVKLAPIMRDAATGMMGT YFFGKTMCMQCQDFTLYGQTNSLLAE EPDFAYAMSRF  
YVDVVKCMGALQVTPSFMQGSVYSYITKKGHALNILFNRLVLAISSKDGWEDDEELKQGAKITFLS  
NMIEASKDSQYWTHELLVQAIIGIWF AASHQPWINLHFVFLELCTRPEYIDLIRDELSSQENLDYETI  
DRLPILDSLMKEAVRLNPLDKTVAVRRKAVKPYTFKSTGQHVPVGQIACIPAWDLMHDESKYPDP  
NVFDGMR FVKSSPDAPPSEVQGTRFTDASKDFPIWGLGSKVCPGRWHSALVMKLVLIHLVKNYDF  
RLKDANKRYKWWFETFQMPVEDTEVEIRKTRT\*

>CYP51181B1|11146|Dibbae1

MVWYLLDNFFGGTEYTRNVDEAYIFKDIHAVLNILMKEAYLDKAMPIVSRGIRKNVAYFAPLDVD  
PAKQTSWGRSSEPQIPRDAPSTVEVTLFPLIRNFTAYIASPALMGTA FMKNHPSCISDLWTMDAALP  
FFITKIPSWLPIPTLKRAHAARARLHAAMIDFFTALERSLDGKEPEMRWKDLSVDSEPMWNRCKAW  
RKTGLTAEQYSPPEISILWAMNVNANNVFWLILRICSAPEILKRVREEIDPYITLKVEESTGTLSCDL  
DASGITKSCHYLKAAMYESLRMDTATSTIKSVLNDFTIKESADKFSETPQSYVFKKGEYLHVDHAL  
HQTNPYFPEPHVFNPFLVEEVDEAEKVTMIANMGSIRPFGGIIFLDPHMGTY\*

>CYP6187D1|11170|Dibbae1

MTDHYRHKMWRSVLNPFPSKQKIATLEPLIHTQLEKLSNRIDSFVESGKVLTIAGIYAAFTMDVITDY  
AMEKSYGNLDFEDFNQGMANATKKFGKIWHLGKHASWFVPLFSKIPASIIKRLDPDSAQWKAFQE  
SCLEESRKIVTADSESEVNRKRHKILSEILKSEALPSSEKTVYHLRDQVQVLVSAGTDTVAHTLRVLT  
FHICNNPDILIRIREEVRQLELEDFTSLRLRDLEQLPYLTSVIYEGLRLSEGATLRLTRIAPDRDLRYRD  
WVIPAGSPVGMTMHSILQNKEIFPNPSKFDPPQRWMDPTDRRRLEKYAVMFSGRTRNCLGLNLAW  
AELYLSVATIFSRYDFKLFFETTAEDVEVGSDQFVPGTKSGNNVRVKATKADASARKIKGTSFYAF\*

>CYP6174B1|11179|Dibbae1

MELFTIVLVLLVWLVVRVLSSTLHKGIEKVGRSWKSALLLDNPVSDLVEKGYRKVIKIYQKPFLVRY  
WAKDYVILPLKYLDPVKLADKRHLSFTENIPDGLNPQLPEASDLCLSEAAAYAFEADIGDCAEKKQF  
NAIEVLTSVTIRVVACVIVGEELARDEEFLKAAGTYFQGNFLTGVILLKLPLAIFRNVLGGSIAFYQRQ  
KLRKLISMVSPHIEKRIQQAQGVKSERIDGIEWTLKLSSEYPFASNESGPVWGISKELIQNLWAAGA  
SPAAITQMLFHILADPSYLEPMRKEVEDAVAKHGWSERIINDLPLQDSFIREVNRFYPIFTLNCTRTI  
MHKPFEFNDGFVLPAGTRIAFPAESSQLDPDHCDNPDQFDGFRFAKLTMAESKAEDNKVNTWAA  
SHVGPANLTFGFGNHVCPGRFFAVRVMKIIFSKLIYEYDISWDRTEPGQPARFKIEGLSVPNHLQSIY  
LKKRVPSS\*

>CYP5125F1|11336|Dibbae1

MNGLEVQNEMKSNNGNVHTRVFRVILTSHLEKLQPLLRDTISRASFHEIDS AIRVEENWRKLHGFSM  
AKRLITNVNSLVFFGDKLSQEPEFLLA AEQYLDLDFITAEIIRLVSAFLGPLVAPILMHQHKASKTMV  
RFLTPVVEQRIRQSGNRGVAEQKHIDCIQFFVDATSRKKKEWNATKIIQVLLGIWFASVHQPAMCLV  
YALDDLCDHSEHIDLLREEFKHSAQNGGGNPLLLDSFLKESARLHPSDAISVRRLVLRPYTFSDGTH  
VSAGDVACIPLQAILIDEKHYPNSMAFDAFRFLDQTSKANSTPFTNASAQFPLWGLGRHAW\*

>CYP5180E1|11342|Dibbae1

MDSFSGQAMALVLGLILVSGLCLEIYEAIRLKGFLTAKLKAFRQLGRRCLDVLTDFLNF EKTLENID  
PNEPTSLRTRL YGRTLQILGPAQFEALRPFMQSKLETVFRERLGG AATGKGWISVKMAPLLRQAAIE  
TMAITIFGVAMPNEPSFRAALFQYPRDMVRTMAGQQMTPKFLAPLVRLVATKNGQALDVLISRLM  
RVTKSKGQDWDEAVEIKLLSVLQMLMDSISESPYWTPYTLAQAVVGIWFAAAHQPWVHIHFILLEL  
CERPECVELLRNELAATTSLDYNTIDKLPSNLDSIRRKALRPFNFSGGGPHVPEGSVACISQWDILHD  
PANYLNPFLFDPTRFIHTNVAGQSQTASDRVTEISENFPMWGYGSRACPGRFHAVFVIKLVLVHTLR  
NYDFRLEDEKAPRWVHWDTFKMPYNNTKMEFRKREQHRQ\*

>CYP5077B6|11408|Dibbae1

MYFAIPQTQSTTNFHGHL SLLFLALLPLFLFLASVIQCYFRLRHIPGPFPAKFTNIPRLWVKSNAH  
DTHIALHRKYGPLVRFGPNMVSVDPAEIGKIYGF GKPSKSDFYRALLFRSRGKALPGIFATQDEN  
LHRILKKPVSAVYSMSNLVSFEPYVDNTMRVFCSQLKTRFAENSREHSKICDLGEWLQMFAFDVIGE  
ITFSKRLGFLDKGEDVDGIMSQIWNTFRKTS LQFLRGSRKSPGVVFATSRIQERKDLQRGTEKNDWK  
VNDRDFLSRFMEIEAKDRTVPPEALLVWTTSNITAGSDTTAILLRTL FYNLLTHPQTLHRLRDELDN  
AARTGNLDELASWKQTRDLAYLDACIKEAGRLHPPFGLPLERVVPPEGAEICGQFLKGGTIVGISG  
WVAHRNEESFGQSDSLWRPERWLCDESRKRMEASLLTFGAGHRSCLGKNISYLEICKVVPTLLRH  
FMDMLVGPEEDGYWDVQNRWVQQFGLKVRLNSRVEAH\*

>CYP6431B1|11430|Dibbae1

MSILVWTSFLCGVGSLLGVLSIARRAKHIPELRSTSGWFGVWEDGMRYVKDSPGVLSEGYEKSTIT  
FQPFKDLTHRLQVSQTSHTISPIVQNDKFHFETISSALTPSLEHKVGDILDEIKHAFEDEIGTSTEWKSF  
TAAMKAHRIATR TANRVLVGAPLCRNEEYLQMSIRYTIIDVFGGADKL RKYPEFLRGLMSKLVTRVA



EQQKIARKHLIPYIEERLAKQSKADEGKGSDSKPSDSLQWVMDAAPNDLERDPQRLLLLRLLHINVA  
AVHTTSVTFLNCLFDLALHPEIHEELRQEIKENVASFGWTKKTLNLKKLDSFMLESQRLAPIASSQ  
MTRYAVKDFIFPDGTLIPAGNWVLAPMYPMSLDDDLFPEAKKFDAFRFSRLREQPGEGNRHQFVST  
SASHINFGHGKRACPRFFASNEIKLLLAYTLSSYNIKYTEDQAPPVPFWYDRSRRPSQSAKISFRFRN  
EAL\*

>CYP617G19|11501|Dibbae1

MARGGQIIALSVLGSAVLLVNIKPEYSVKASYLWTFITFYSIQFFARSTWSWYIYPNFLSPFRHLPEPK  
DGDPLMGQFRTIMKEPTGVPIARWVNSIPNEGLIRYRMLFNQERLLVTSPKAIGEVLVTKNYDFEKP  
PELKRQRKHLMPAFSFRHIKDLYPTFWTKSVEMVKAIGQVAQTGAANTGQEKGEPTPIIEVADWAS  
RVTLDIIGVAGMGQDFGALQDPNTELNKTYRAIFSPNAQARILGILGFFIPFFIVRMIPVKRNADVVT  
ASQSIRKVCRELIQSKQRKLSKEPVNPDILTVALQSGGFTEDNLVDQLMTFLAAGHETTATGVTW  
AVLHLCQNPDVQTKLRAEIRANLPSVDSSTEVTSEMFDKLPYLHAVCNEVLRVNCVPTLTRRAAVK  
DTSILDQFVPGKTDIICPLATNTSTALWGPDAAKFTPDRWMAFGMANSNGGAESNYSNLTLFHGPR  
SCIGQGFSKAFAFACILAAVGRFEMELEDPYKGVEVGGGITAKPKGGLRVKVKALEGW\*

>CYP65FK1|11701|Dibbae1

MSVASFTSLAWAHLIIASLLLLVVRLLAVVGDIEACDVLIATTIYRLYFHPLSRFPGPTLWALSYPYS  
LAIRRGDLVYYTEKFHSHKYGEIVRLKPDEVSFINPQAWQDIYGIKLGKRNFRKDPMYRLPAVNGTY  
SIIGCPTETTHARYRRLLSHAFSRALRAQEPLQFYVSLLMQKLQKLSANEPHIIIDWLNYTTFDIIS  
DLAFGSSFNCLQTGTYHPWVRMLFSHFALALISSVMYFPWLFKALMYTLPKAVKQRRIDHFNFRAR  
EKVHERMEAGSETGRPDFMSYVRLRYGEGISTSDGKDSSGREREREREPEKGMTLPEIEATLAIIVAG  
AETTATSLTGII SYLIKPYASTVLKKLVEEVGRGMFEREEDITAEVVGKLTYLNAVIEEGLRLCPPVPTG  
LPRVVPEGGDYVCGEWLPENTAVSYASWAAATHSPTHFDPEIFAPERWLASSSTSSSHSSPSLSPSPY  
ANDTLPASQPFSVGPRNCIGKNLAYLEMRLILARLLWGFELEGVESGMGVGKGEAGAEWRDQKV  
YTLWEKRPFVRLRRRRG\*

>CYP5570C1|11773|Dibbae1

MAASKYRGLGNPFAATAITPLLVLAAAYQWLAQLQIDVQTRKIGLQLIACTLASTILSVATYRLTLHP  
LAKYPGPWWAGVTDWYNVYRCLTGDRHIDFYRIHQKYVSLVQVFSTEKALGQFVRFGPNRISINT  
NTALRDIYAVNANNQKSHYYDSYKHFFKVPMSMTTIDKKAHSFKRRIARALTNRAPESEELMIRNI  
RTFCRMLVDNPANDDWN SAKDMTTLVAYVTS DIMSDATFSRNWNMLNSKENRYIVELLATGVLG  
VNMSGYMPAILALKLDKVFPHIVRQVYKFEELSRAQSDWRAQQPRSANHRDLFAALLDARDPET  
GLGFTHREENISEAGLLIAGSDTMATGITSTIFYLLHYPLTYERVVAEVRCAFGDVEDIKAGSALNNC  
TYLKACLDEAMRLTPGVGGLLPRETLSGGIIDGFEFFPQGVDLGVPHYAIHNAEYYPEPFRFKPER  
WLIEGSTRKEDVTLAQSA YCPFSLGRASCTGKQIAYQEMTTILARIMWLYDMRLQDASMCEGRRDL  
GWGRHIREEFQVYDNFTSSHKGPMVEFKPATR\*

>CYP5328K1|842|Dibbae1

MLELLVVLPLLWAVYSCVALVRNLQQARTIGVPIRICPVSPNTSLWFIFEPLVLHVLDHLPFELGSF  
GRYSRRGWHFYDKARSHIELGDVWVLVTPRETWLHVADPEAINEIFARRIDFVRPTELYNMRQVGL  
TDWPRHRKIIAAPFNENTNTLVWTESISQAREMLVSWVKCGRTGTLGLAQDTRTLNVLAAATGFR  
RSYKFYRATEATTPSKIEPRSYQEALSILENTLLIMVTPPKLLFLPFVPKSWAVIGQAISEFKNYITEML  
NHEMSLLKD GKS GTGLMTSLVRASGIDEKIDCGGNPKGLTVSEVLGNIFFINFAGHDTTANSLSY  
ALLLLSAHPEVQTWVSEEIEKLTDECVTYEKAFPRLKRCQAVLLETIRLFPPLPALPKWTDNKPQSL  
RVSGKTLHIPSETMVVSSLVAVHHPKFWSPDPLVWRPSRWISSATAKPNALSGQIACEQLYSPPK  
GVYFPWSEGLQNCPGRKYAQVEFSAVLMCLFKSHRVEVVPKGENVEAARSRVYHVVEDSEQVLL  
LRMRKADSVRLTWREVQ\*

>CYP505A70|1661|Dibbae1

MGTPIQPPELPLLGN AKDIDPQNILVSQMRLADLYGPIYKLRIGGRERVTVGSYEFLNQICDEKHFH  
KELSGALMQVRNGIGDGLFTAHNFEENWALAHRLMPAFGLPIRDMFDEMHDIASQLLSKWARY  
GPEYRISVTD DFTRLTDSIALCAMDTRFNSFYRENLHPFVDAMVFFLKESGNRTTRPEFLSNLLYRA  
DTQKYWDSIKLMRDVADHVIQDRRAHPSDKKDLVAAFIHGKDPKTGKSLSDENIANNMITFLIAG  
HETTSGLLSFMFVQLLKNPVAYKAVQREVDEVIGQGPVTYEHMSKIPYITACLRETLRLYPTAPAFSV  
VSNDKDRPTFLGKDRYEVPNATITALLPRIHRDPAVWGEDAEDFRPERMLDENFNKLPPNCWKP

FGNGVRACIGRPFAWQEALLVTCMLFQNFDFIPEDPNYQLTYSQSLTIKPANFYMKAAALRSGIDAIS  
LERGLYGAPAKKDLAAKDKKIEDMATSGPKPKPMSIFFGSNTGTCQSLASTLANAAAGHGYPDATV  
LAMDMAAESVPKDHPPVLITASYEGQPPDNAARFVTWLEGLKGNELTGVKYAVYGCGRHWQOT  
TFQRIPALTDKLFDERGAKRLAPRGYSDAADNDIFNDFDKWADKTFWPAIVSEYGGGAENDAEIT  
GLDIEISTHIRSSDLRQDVSEAIVEDQVATIAKTIPEDETRNLKLLAISKSEDCINMLKRASPLDLLETYS  
TAALPFSSFLPMLPPMRIRQYSSSSPLVDPETCTLTYSVLDTEKDGRRYLGIASNYLSELQKGDARV  
AVRPSHQAFHLPLDIANVPVLMICAGSGLAPFRGFVQERAKQIEAGRTVAPALLFVGCRHPPERDRL  
YAAEFWRWESLGAVKLYYAFSKDTSSGKGCKYVADRLWAEREEARALFDAGAKIFVCGSGAVGDS  
VREMILKIFLEGMKARGQEKTEEEARKWFMGIRNERFASDVFT\*

>CYP6001C40|1702|Dibbae1

MLRRFSSTFNKKKKEEGQVNGTSKVNGTSGMENGASGKQLAPPAHTEHKDEHAVKREDVATSLE  
NFAQLIHAARRPLPTQTGDGSYLDHPVPSGLMQDLKNLGFKDVKTLMQVMRTKTAGGYQDDKTY  
LMERVIQLVSGLPDLSTRVDLTNSFIDELWNSLLHPPLSYLGDKFKFRQPDGSYNNIMYPHLAGAN  
APYARSVFPGTLQLGSLPDPALIFDSIYARKKFRRHPPNNVSSAFFYHASIIHDLFRTSHKDFNSETSS  
YLDLSPLYGSNQEEQNLVRTFKDGKMKPDCFSEKRLLGFPPTGTGVWLMFNRFHNYVVEQLAAINE  
GGRFNKPHEGLTVEQNQKLWEHYDEELFQTGRLITCGLYMNVTLMMDYLRTIVNLNRSNTTWLDP  
RVEMGKVFGRHDGTPRGVGNQVSAEFNLAYRWHSCEADEKWTEGLYYELFGKGPNDVSFPELLQ  
GLGKWEASIPDDPMARQFAHIKRGPDGKFNDDDLVLKILNDAIEQPAGAFGANNPVALRAVEILG  
MQQARKWNVGSLSNEFRKFFGLKAHETFEINPDPEVAAQLRHLYEHPDFVEMYPGIVAESAKTMP  
VPGVGIAPTFTISRAILSDAVALIDYHPQNLTNWGYSEVQYDLHINQGCVLKFLRAFPNHYKSDSI  
YAHYPMTIPSENKIMKTLGREDDYSYDRPQFIPPRVNLTYSVGAKYILERPQEFNVTWGDATGAL  
MGKGGDLDFMLSGDTAFHTQQRKTMAKALYRDNWHKEVKEFYEYITRLLHDNACKIAGHNQVD  
ITRDVGNIHIAHFAANVFSPLPKSADHPHGIYSEHEMYTVFAIFVAIFFDFDPAKSFPLRMGSKVITQ  
QLGKLEIANVKMVNSTGWVAGIVDPLMKNNNPLTDYGVHMMVRRLLSGLGVHEITWSQVLPTAV  
AMVANQAQVFTQLLDYYLSEEGIKHIPDIYRLAHEDTPEADEKILHYAMEGIRLNGTFGSYRRSTITT  
TIDDGGKPVSVKPGDNVFCFVGANRDPTIFPEPDAVRIDRPMDSYIHYGVPHSCLGGDASKVAL  
TAMLKTVGKLKLNRRAPGPQGVMMKKVPRPGGFYVYMTENQGSYFPFPTMKIHWGDELPPPLKAR  
HETAKVTTSGSGPAPAAPKKK\*

>CYP6352B1|2110|Dibbae1

MSTITLPLMHLPLGLRALSMENCILGAFAVLYLINSYFVNPLSRIPSIHWSAPLSRAWYTCAIYSKPR  
THIHLKAHRNGGAFQPLVRIGPNEVSVMSTAAIKTVYESGNFNRTSWYEA FMKWGQHIMFTFQSA  
QDHQNRRLRYMKNYNRTAIFGTHCQHIIKRSRAKLVNLLSQTSDPTKSTTRPFLARSLCRALQLDV  
VTAFTFSDADGTRFLDRLDASLYNTVDEVGMDVIDLFYDERNGSYLFWIEEAPYKYFINFFSKISRES  
KAAHARA EKWTSGLISRFEARYQNCKDGAEQQRLVETSIYGKMLAFKSANGLGQIPWEQRAAEIL  
DHIGAGQENLPAVLDFIIRQICIYPDVQDAIREELKTLPGGIEAYNPVDLENLPYLNNAVVLGLRLVQ  
VVESYQPRFVPKGGCTIEGYIPEGTVISSQPFLIHRQEEIFPEPETFLPGRWLVEDKEKKRVLLKSMW  
AFSSGPRGCIGKDLAMATMKTAIGSIYSHFSTQLMSEDRPRRSWESHYAMSEVTFTRLY\*

>CYP6232A2|3412|Dibbae1

MYSIASLVLCIAGLLLFYRLQIAVFSQLSAVPNAHFLAPYTRYWLKYLKVTGQEHHRDAAHKRL  
GPVIRLGPNELSVNCIENGVS TVYGGGSGGWDKGAWYGVFENYGHSMFAMAEPKPHLERRRML  
ANVYTKTYIQSSPELTDLTNTMLSERLLPQMRSWAETGKEVDVHRENKAFIMDCGTAYIFGLGNGT  
NFIQKPEEKALLRDFELGISGLFWFAEAPSFVKFMGCFGIKLIRDEVIKSFQVMEDLCLKMSEKAKLA  
MQHNSAKVRSAPPTVYAQLRKKLEEAKNSPDAINTMTAAELLDHTQAGPDPAGITLTYVMAELSQ  
NPAARHRLREELRTLQRKDAIWSSPRALDDLPYLDVAVVMMETMRLHPGAFGPFPRLPVPPGGTTLGRF  
SNIPQGTTVSTAYSLSHRNPSVFPPEPERWRPERWLD SGAEARKEMQKWFVWFGSGSRMCIGNHLA  
VRMMKSFIAAVYSEFDISLVDGKIPSQTD AVIAYPEGNMCLMRFHKIQPVLV\*

>CYP619F3|7832|Dibbae1

MFSLLIFECVGALVLGVYIYAVLSLSKGPPTLPLLGNLHQVPKTGAHLKYSLSQPVLQFTEWAKEYGG  
IFSLKFGPANAVVITDRGLVKSLIDKKGAKYNQRPQSYVAYDLITKGDHVLVMQMGEPPWRVTRKT

LHQLFMESKCENEHISLQNAEAIQMLRDICNTPEDLMLHPKRYSNSIIVSLLYGFRTPSVGSKHMKE  
LYEIMEMFSSIMEVGATPPVDILPILKYMPERFWRNWQTRAKKVGGMALYKMLQRVLERREK  
FGSKGSM LDTVLDDQDKLQLSPNALRFFCGASMEGGSDTSASMILVFITAMLKYPDIQKKAQGEID  
AVVNEDRTPLWSDFDKLPYVNMIVKECMRWRPVTPLSLPHSTAEDDFVEGMLIPKGTTVIMNVWG  
IHMDPTRFSPDFTFNPENYRGKTLAAEYAAASNDPENRDHYGYGAGRRICSGIHLAERGMWQAM  
AKLLWAFDFSELPSKPVDVSKETGYTEGFLHCPLDFECDVQVRSKRKETIMREFAVAEKEVFSKYE  
DA\*

>CYP6524B1|8624|Dibbae1

MYLIGFFALFTMWYFSSLPKNYFLARKTGLPIIVCPVNPVNIFWLVSVVLEPTFARYLPSFIYDQLKV  
GIYGWEFRFRYTVNAKLGPAFVLVTPARNESNGSEWQRHRKIVAPVFNERIMNSVWDESSAQARD  
MLEAVFKRPAGSKASLSGEKESDDMVEGVRTIALNVFGFIVYGDRQSFAHTSTKAEAPPGYQLTFM  
ESILSILNNHFISIFVPAHILTLWMPRSIQKMGIATAEFPKHTKDFIAKERNSPSAQNTLLSVMVKTA  
DNERHQSAKPGRLASYLSEDEITGNLFNFTLAGFDTSNTMAYALIILAIQPKWQDWITQEIDQVAR  
LHPDASYEDTFPLLTRCLALMYETLRLYTPALHIPRCTATTQTSPVYIPAKTTVHLALACMHVSPAL  
YGPDP LAFRPTRWIAAPSPGSDGETLISPPRGTFMPFSSGPRSCPGSKMAQVEFVGVMREIFANWRV  
EAAQKPGETGVMARERLGKVVENSQPKITLQVKNPRDVLLKWIRR\*

>CYP578AB1|9170|Dibbae1

MLPVTVLLSAAAIVSICFYKYFLYPVFLSPLSQIPNAHFTASFSSLWILRVRSKSTENHTLLSCHQKYGP  
VIRVSPNEISINCVDNGIRTVYAGGFEKTDWYPKSFNGYDIPNMFSTAESKPHSIRKRMISNIYSKSYL  
QTSQEDMQSISQTLISQRLPSLDSFAQSQIPIDVLEWNFAIFMDFVTAYLFLGLNGSNFLLDIEYRRH  
WLSIYNDRNENNFQPELWKSILYFLGLKIVPDKVAANKEIEEFTLKMCAADATITTDHKTDTST  
TLKTSPVVYQQLFQGLERADLPWSKYPKDLTVASEMLDHLAAGHETSAILTYLMHELKRPPELQ  
DALRAELLTLTPITYPLSRTGDLMQIPNPRSTDSPQLLQAILLETLRHAAIPGPQPRITPYNQPTPIK  
LGQYSNIPGGVRVSALAYTLHRNPVFPNPEEWKPERWLHASKEQRTMDRWFVAFGSGGRMCI  
GKNLALQQLNLVIAAIYTNFRTKIIDDGIEQEDTYTARPTGNKLVLKFERAQ\*

>CYP578AC1|9807|Dibbae1

MQHNDVWTHRFDAWDENVLTDGDDGPWSTFAIGLGTAPQYVRVLISTTCPQIWAVDWQGCAPT  
DTLDCGNSRGGLFYSKESSTWQDKGLYQLDEELNLGYSGAGDFGLDTVALGYPGSGAVVLDSQIIG  
AIALEEFYIATWGIAPRPTKLTTIDPINSYQSLKQVLGSLTIGAYDTSRVAPNNLSFGSAEDVSRDRIVR  
IQSIVASISSMNGTRASSTLLPNAAFEKLFDIQWGPVPDLNLVNNTLHSSLVAQNACIAFQLGTDTV  
TQHTIDITLPYASFDLQATATYPGISNATACARYLIADYERSNFAINQCVFGEQAQQDIRPILSVNV  
TNTTARPIPLGPSNPGHLSVGSVAIAIACSVLAIAMIASGLGYRIWQKRKVQGIHWPGEETGNDKSP  
RIELEDKSGLEDLEGSNQYRNEPENTEAPLDELGMSIAVVLASVSLFSFLIYKYIVFPAFLSPLSKIPN  
AHFTSPISPAWIWRRRTQQENVISIFGAHQEKGPVIRLGPNELSVNSVDGLRQVYTGGAKTDFYI  
DEFENFRTPNLVSMLEHRPHSVQKRMLTNVYSKSYLQGSLEDLEIICRVMIYERLLPVLHSNAESGTS  
NVLELMLGTGMDFM SAYLFGLENGTDFIRDVGRKQHLEAYRIKGYRLPGADQASKELEAHCLSM  
CQAAEQTMAGIFQTTTKPVVYSKMFSELSKSDLSYASSSRDIIAASEMLDHLLAGRETVGVTLISYL  
MLELSRRPDLISKLRSELLTLSPQITYSSTKGNHSDINGITLPSHQITIDALPLNAVYETLRLHGIAAG  
PQPRITPPNATIEGYSNIPAGVRISSAYS LHRNPGVFPDPEVFKPERWMPGETTPKQSEAMRRWFW  
AFSNGGRMCIGNNFALLEKLVLIAAVYSNYLTSIVDASGMEHEDGYLAAPVGDKLVLNFHCA\*

>CYP6002C1|10274|Dibbae1

MPLPSVVETAGPLVKDIEEKLKRYIKDLRSQARHLPEDVGILNSALEATLENGLDDDKNYLTERIIRL  
ASDLPDGSPSADVLTSAFIRTLWDNLQHPPLSYLGDTFKYRSADGSGNNVMYPNLGKADSVYARSV  
TPRHSQGLRDPDPTTIFDTLFAKGPakeHPNkISSMLFYLATIIHDLFRTCDKDRTKHANSAYLDL  
GPLYGHNAQQQDAVRTFKDGTLPDFTSEPRILGQPPGVSALLVCFNRFHNYVVGQLAEVNEHGK  
FSLPAGMTPEHEGYKAAQSKRDNDLFQTARLITCGLYINIILGDYVTILNLNRSPTTWRLDPRKNF  
NDIFDVTGTTPQIGNQVSIEFNLIYRWHSATSRKDEKWAQGFFEQLFPGKDPRTLSLAEFRNGFQL  
WAHSLDKDPGKWTFNGLKRTKGGKFSADILKLLVEGTDIAGAFGAQNVPTVLKLVEVMGIEQ  
AREWQVASLNEVRKFFGMTPHKA FEDISSIPEIAATLETLYGHPDNVELYPGVTVEDAKDPLAPGSG  
LCPGYTISRAILS DAVALVRSDRFYTVDYSPANLTSWGFNEVSADPKIAQGGVMFKLLMRALPGFYR  
SNSVYAMYPTIPSENQKILRDLGVESDYDFTQPCFVGPPPLPVVTYSGAKEVLKDQLNFKVPWGP

SYMTHHDYMLGGDKSANAEQRRFVQEAMFTKAEDFLEIRKFYEAVTTKLIREHSKTLGGYWQLDA  
VKHVGNPESHADFAARLFGFSDTFEDKELCQILATLFTWVFLDLDLPVKTYELRLAALEATTKLTA  
AVETICDKVNRDGLDSDQDQTDLEGRDSNLADYGTRLVKRLFAGGKTPDQVVSIMIVPTAAAA  
YGPSPSQGIAQVLDLFLTPPYSKHWPEIQRLANNDKSDSFEKLIKYGLEAFRLSTPAYGVV  
RACTAESPVAIHDGERTVTARAGDLIYVDFATSSRDRSVFPNPSEIDLNRPDSDYIHFGW  
GPHACLGRPIAEVALAAQLKVFALKNLRRARGLQGVMSKGTVPGTDVRFMTEDWSSWSALPTTLK  
VEHHDGFEGEGKEIDA

>CYP59AE2|10353|Dibbae1

METTSVKAVASPLRVISGVLVACVVVFLYKLYKERSRALRLQRLGYSMPPPLNPILGHL  
PVL AQMMSKLPKDAH PHYLPDQLRREYPDLGPMYYIDAWPFATFTLVLASPSTLAQVTTEHNSPK  
FPAIRDFLYPLTNGRDIVSMDGQEWKTWRSIFNPGFSASHLMTMVPPEMVKETVIFCRILEEHA  
EKQDAFAMKNLTTDDLAMDIIIGKVLLQDRIENSLIPSSDSDLVNQSVNPVVSALRQQVRWMA  
FGSEGNNPLQQYHPLRPFVHIYNTWKINKYISPEVDARFTCRKDQRRGKENKPGKSVIDLAL  
TAYLKQNSTDTGDTSSQSM DPTFKELAINQVKLFLFSGHDTTSSICYTLYLLSINPGVLSRV  
RAEHDEVFGMDPKQAATRITEDPYLINKL PYTTAVIKESRLRYPAASSTRSGEPGYTITDSH  
GHKYPTEDCLIWMISHAIQRDPAYWPRADDFIPERWLTEPGDPMYPVKGAWRPFEHGP  
RACIGIELSMIELKLVVALVARRFDIEAVYGEVDAIQQRGKGESRTVVGERAYQLGMTGQ  
PSEFLPCRVKISA\*

>CYP59Y1|11092|Dibbae1

MPPWSPIFGHLPAIAPILKTLPKKAQQAYYFNELVKDFEDSDTLFYLDLWPFSTPLCLV  
SSPSIAIQIASQQHDLIKPTTIEYFFRPLAGGDNLFMTNGPEWKRSALFVPGFQANYLLSQ  
MSHIVEEALVYVTVLEEHAVKKDMFSLDEVDQSMILLIRAYNPLTSAMRNQVSWLCLEDEL  
NPLVRWNPLRPLMFWWNGYKMDRYISKELDKRFAERRRSERDSTESSRSIIDLALESYIVEN  
PSMDTAKGLNDSFKSWACAQIRLFLFAGHDSTASTICYIYLLFTHTDALERIRVEHDEVFG  
SDITKLPTLLNDRPHLINQLPYTIAVIKEAMRLFPASGIRGGRPDVYLDVNGKRYPTEGT  
SVWIVHVSVLHRHPKYWKDPDSFIPERWLVGPEHPLYPVKGAWRPFEFGPRNCIGQTLV  
MLDVSVTLVMTLRRFDIHNAEAWDSLHPGNAQEIKSVRGERAYQISLGG AHPADGFPCR  
VSLREP\*

>CYP6677C1|11371|Dibbae1

MIVRNIGLPIVFSPIYKMNVPWL VACRYTRIQYHLQLLPFGLGRWSRYTFLGWVFD  
DKYALHKELGPAFVVVSPGGNDVFVADAEATHDVTKRWKDFVKPKEIYKVLEPFGRNLD  
TVEGDDWSRHRRLTAPSFNEKSSALNWAETLTQAQQMSTIWLQKGSEGTRHTVEDTATLAL  
NVLQAAGYGLYFPFHEDSPIPPGHSM TYRDAMATILSLYTLYMLIPSSMSPWMPQFVRTL  
GHATKEFMMHNEEMLRNERASISKREQGTANLLSALVRASDEAQKTTVGGRSQGLSEEEI  
FGNLFYIYGLAGHETTANVLSYTMCMMAIYPEWQEWVAEEIAFVTKDNPDPKNWKYEEM  
HLKLKRCLAVMFETLRNYGSVVFIPKETNENPQDLRIAGTTYMIPPKTSVNLNIHAVHV  
SPKHYSYDPDLTWRPSRWIAGHAVAPT AHKDISVPGNESLIDPPAGTFTPTWDGPRICPG  
KKFAQVEFTAAMAVIFQRMVPEVVRPGETLEAKKKEVLAMCEDSQLQPNTLQMREPGK  
VALRWREVGR\*

>CYP534M1|11478|Dibbae1

MWSYIGLGVLLIVGLWTSATYRSFAKNLAAAKSSNIPYVVVPVYSFAPLWLAINPFLV  
PYLQKLPARWIDPWLLFVTGDWAWHNKYDVFRKMGSDFNMTVSPGGNMLWTADAPAITEI  
VARRNDFPKPVYIYKLIDIFGKNVISSEGQIWRQHRKITSPPFTEKNNH MVWSESLHQTEA  
MLKSWTGPPGTPPRTIATLAADTMRLSLHVISRAGFGVRLPWPGVENEQAVEVPGMTEGHT  
MTYVEALTELVEHLFWIILMPHWLLRRIPFAGPARAWQCFSWSRYMQEMYESKKLDIQE  
GREKEEGMDLLGAVMKGANVVQPKAIGNGAAKSAANSSALEKGQKPAPTTRALTDQEIFG  
NAFVFI LAGHETTANSLHFSIVLLAMYP SAQRALQRDLDRIFSFKPVSEWDYERDVPEL  
FAGMVGAVMNEELRMIPPVIGIPKSTFANQPQEILLDGKLCCTVPGGTVVNLSAVAVQ  
RNPKYWPSSDPNVDVPTDLNHFRPERWITESSPAYSCIQKPASHTKSMNGHAANGAANG  
HAIKPNSVPIPKIGIATETRASTPSDDLHLNTAPDTSLALYKPQRGSYIPFSEGFRA  
CLGRRFAQVEVLAVLAVIFSQYTVELAVDEWASDEVVDGWERGGEERRAVWAKARETAR  
GRMDGMSLITLKM RAGEVGVRVFKRGTRERFVFEDESW\*

>CYP6259B1|1963|Dibbae1

MAYYALELLGALAGLYYLAKTLSLRYRFSKAARQHGCCKPAPRYSHWDPPFGLDLFI  
RLRKAHVAGQSSQTHAKIHEQYGKTLEMKTMTGTQVRTAHPENAAICASMFDEWEVTP  
LRGRIAAPFIESGIFTHDGSIWKRARALVRPIFNKSEIADLGAFDIHVGRFLRLIPKDLST  
FDALALSKRLFLDTSTEF LFGQSIE

SLLPQTPFDTAEFMRAFDASLQGVALLRILAGPLRFLFLLDPTWKRNYTRVHDFVDKRVAIALERQRS  
MSTISKASSEKASSEKYILLNEMAMVTQDPLDLRAQILNVFFPARDTSAITFSNILFELARHPDAWEYL  
RSEVLSIDPSQKLTDFDLKTLKSTKAIINETLRLHLATSRVSRAAARDTILPVGGGLDGRSPLFIPKGRQ  
VSIDLHTLHRDPSIWGEDAEFEKQQRWGPGRPLWEAKWQYEPFLGGPRMCPAQNQVLTQLSYLLV  
RIAQEFRSIENRDDVYEVETIRLTNESKRGVQIALVPA\*

>CYP584AV2|4449|Dibbae1

MVYKATSEVLYALLGLAAFYLLARRIAIWLGRRKMIRELGCQMPPSLPSMDPLLGLDSVLQTIRSVK  
ENKGNMTLKQQLDQGLTFRNTLYGRTKFFSADPQNLQAILSTDFESWGIQPMRLFEEFPLAGKGI  
MTTDGSLWANSRALIKNTFSRTQIADLSSFEHGVQRLIKLIPRDGSTINLQPLFSRLALDSSTEFLLFGKS  
VESLSPSCSLDAQAFLAAYNYAQAGIGKRMKLPKWNILTYDPKFWESCKIARSFVEGYVDEAIRQC  
KSARGGEKLLVLAYELARVTSRDRVIRNELLNVFLPGHDATAVALTNVFFMLARHPEVWTKLRE  
EVLGLDISELTFENLKGKYLWVINETMRLHPVVGESRRIALRDTVLP TG GGPNGTSPILAKKGDI  
MGTSFYALHRLKDVYGEDADRFDPERWATLRPRHWAYLPFSGGPRVCIGQQALALTETAYATVRIV  
QTFGAIENRDPVNEFVELYKITTESKNGAKVALIPA\*

>CYP52AA11|5277|Dibbae1

MQQWVLALVWAFVSFVIYTYVSSILAERRYLAEMDRRGCKMPVMQTA VLP GSIDRMYESLKADR N  
KSFPNVVQKRQDVGDKTFTWKILGHRGFFTADPKLVQAILATQFNDFYLGPTRRGNFMPLLGNGI  
FTADGKMWEHSRAMLRPQFARDQISDLRLEEKHVQNLMRALPVDGTGWTKT TDMQV LFFRYKID  
SACEFLFGESVDSQILNLPENASKGSSGSSATDESVFATSFDKSQAYTASRARLLDFYWL YSPKDYKE  
SNKRVHQFVDYFVQKALKGDFHKEKELEEGHDKDRYVFLEQLVSETRDPIELRSQLLNILLAARDT  
TASLLGYLFWILARNPEAFKKMRSTILENFGSYENPRQITFVTLKNCQYLQHCINETLRLYPVPANS  
RRAAKDTVLP LGGGPDGKSPIFIKKDAQVDYSVFMHRRKDLWGEDAEFEKPERWVGRKPGWEY  
LPFNGGPRICLGQQALALTEASYVTTRLLQRFD AIENCGPLDKEPKHALTLTSCPADGVVVR LHEAK  
A\*

>CYP539A54|7787|Dibbae1

MYAGANYVEWELYDGLFRKYGRGQWTMEGTVAGRRTVFTAHPENLKAVLATQFSDY GKGGERFH  
QEWEPLGDSIFTTDGDQWHASRHLIRPQFIKERVSDLQILETHVHVLLKTIELEGSGKAGGVPRM  
DMDMNDLFLRYTLDSATDFLLGTSVDSLENPEQSFAKAFGEVQRVQNM IARAGPLNVLIPRRTYYA  
SLIDVNAFVEPYIEQALHLSQAELESKTKEYTFTHALATFTRDRKMLRDQIVAVLLAGRD TTASALS  
WTFHELARRPEVVKKLRKEIIDTVGLTRPPTYQDLKSMRYLQNTVSETLRLYPPVPFNVRFALKDTT  
LPFGGGPTGLSPIGIPAGTIIVYSTLVMQRRPDVYPAEWSTEGSNNPLRPLNWNPNDRWLNWQPKPW  
TYIPFNGGPRICVGGQFALTEIAYTLVRMLQEIVRIEDLGGLGAEERDEKNL KCEVVMQPV RGVKVG  
LWRS\*

>CYP584AA2|7868|Dibbae1

MAIFLSQVFLPAVGVLGFLFLVSTVRTWYTRRQIIKKNGLCPPKRLPQKDNIFGSDVVREN LKAARE  
FGFLEKLSRHEKYGPTFTTNTFFRTTLYTCDPKILQTVLATQFQDFGMGPLRRSSARPLL GK GIFTQ  
DNKGWEHQRLIRPAFLRAQITDFNIYESHVDQLISLIPTDGTVPDLQQLFFRMVLD SNTEYLFGESV  
GLLSPNASQFAQDFHNALDYAQKGTIFRLRLGKIMWIIHDKKFREACATVHAFGDKFVKKALDIR  
HRRINFGDEKTETGRKQYVFLDELAKDCDDPVMLSDQIVNMLLAARDTTAGLLSFIFFMLARRPDV  
WEKLRLEVLEGWEEP MN YEALQRM TYLRYVIHETLRLFPPIATNSRMANKDVAIPYGGGPDGKSPL  
FMKKNYVVTYSTFVMHRRKELFGEDADKFKPERWEKLRPGWEFLPFNGGPRICPGQRF AITEAGYT  
TARLVKHFAHITNHDPTFEFREQLTSLTLNNGVKVAMGTA\*

>CYP52AJ6|8878|Dibbae1

MRPIFAALLASLSTLIINYFKNKLIKRRRNAEATRRGCEPPPLLRSMGFDPTGLRRLVDNLRAVKED  
RGPQYIVKSINEVGEHVHTIRVHVL DYEV LVTRDPENVKAMFATQAQDFDIGSFRTQNWKPLLGV  
GIFTLQGEAWRHSRSLVRPQFSNEQISNLDLEERHVQALLGKLEPRENGWTNIVDLGPLFYNF TLDT  
ATEFLYGHSVHSQNPTGHTSLPKIEGVENPNQAGFGPHIDGAKEWIYTKGILGKWNWL VYSKEFT  
NHCKEVHKYVDWVFWQLRLRSEAKHNAYTEAAENKQKFVLLNELAKTTQDPLALRNETLQLLNA  
GRDTTGTL LGWIFYFLARHPHVYAKLRAIVLAEFGTDS DRIEFAKLRQCQYLHHCINEAFRMVAVV  
PLNERVASHDTTLPQGGGIDGSKPIFLTKGTRVLISTYAMQHRPDIWGDDVEEFKPERWESR KSGW

EFIPFGGGPRKCLGQQFSITETSYVVVRFLQRYDKLENMEDEPIRLHHTVTNRS GTGVQVRLHQASG  
A\*

>CYP584AP1|9706|Dibbae1

MGKVIIWTDNPINLQAIHAVNFLDYGVQPLRRDATLPFLGEGVFTMDGPFWQH SRDIIRPTFTRNN  
VANLSLFEAHFQRFLGLIARDGSTVDLMPLLCRLFLDTSTEF LFGE SIGSLLPDTPFETEAFLNAFHYG  
QNGMGKRLQLGKLMFLYLDPGWYRSIKIAHAFADKYVKKALDFRSAWLKDKEKEKDSFEKSSGER  
YVLLQELAKETDNPVELRSQIIHVFLAGHDSTAITVGNAIFYLCRHQETWHKLR AEVLAVGNSKLT  
ELLKTMQYLQYIIKETLRLHPVAPTDTRYAYRDTILPTGGGPSGTSPILLYQGGQLVGASYHALHRRSE  
VWGPDAEAFRPERWETVRPGWNYLPFGGGPRICPGQNLALTETAYVLARMAREWSGCECRDET  
W

>CYP52AJ4|9775|Dibbae1

MVTYTYGLLGLVAVVLYNYAKSALEKRRRRLEAARRGCGPVPVLKNKDPFGLSTFISSLKATKDD  
RGPQYVVETMDSIGKDVHTVQVRLLDYSLIVTRDPENVKAMFATQCGEFDIGASRQKSWEPLLG  
V  
GIFTSTGERWKHSRALVRPQFAREQISDLLEERHVQDMLNVLTGKTDP SGWTNNVDLQPLFYN  
FTLDTATEFLYGHSTHTQNPARRAQLPSLNGMDTPDRAKLSGHL DAGKYWIETRGAFWKWYWLI  
SSKDFDYRCKEIIHKFVDWVQVRLRGQKEKLQPPMQSGSRKKFILLDELAEHTQNPREL RNETLSVL  
TAGRDTTGALLGWVFYFLARHPRVFDKLSIILQEFGNNHQTGEISFVKLR SCTYLQYCINEAFRVA  
AVIPLNERVCNRD TTLPRGGGPDGSQPVFITKGTQVLIATYAMQHRADIWGADVEEFKPERWEGR  
RVGWEFVFPFAGPRICLGQQFSLTETSYVIVRFLQRFDKIENMEPPGRIRLHHCIENRS GTGVQVRLH  
EAAAC\*

>CYP50112B1|10860|Dibbae1

MSRLLQVGLWAVCALCFLYAYDRLRRNLAYRRAALAKGCLEPRLYPHRDPVFGLDLFIAQMKNY  
KHHRLLEQSCRWVEQCGDTYQTN SLGVASIKTIEPENVTIFAHNFEDYGLGPLRTDIAGDFMGRG  
IFTTDGKFWEHSRALVRPIFTKAQFADLNTLKVHVDRFISLIPRDGSTIDLLPLLHRLALDTSTEF LG  
TSVDSLPS SSPPELKHFKDAFDYAQRGIEMRAILGKLKVFYRNQKWND AIDIVHAFFDKHVDRAITQ  
VTAEKNALQEGQQAQRHVLLYDMAKQTQDRLDLRFQTLNVFIPAHESTGIAISNVLFHLSRNQVV  
WKKLRTEILGLGSKPLNFENLKS LNYLRYVLNESHRLTPVIPMNTRICLQDSILPRGGGPDGKSPMLV  
QKGS LVTANLWAMQRNKAIWGPDAEVFRPERWESIRPGWNYVPFLGGPRICPAQQMVLTESAYV  
VVRLMQEFRAIESRDAEPWTESLKVTVANRNGVKVSLTPA\*

### ***Graphis scripta* CBS 132367**

>CYP51167A1|9745|Grascl

MTFMHDLFENIAQEIGDHVVEAVYDASIFEIFTLTCIIAIGWHFRPTFYYPYDEYPRIHRPVLSLPWSKS  
VGESLRDGYEDVLKKG DGFTMRWWSKDHLVYLKAAEPDQAVFLESISEKKALNLDSSSPDLFTHS  
KRMIE TVKRGLGATALIVPNVVEEVD TIL EEVLNGRSTSHAFKASSLISSMSQKICCRFLISSELSNNPT  
FLAKNARFTSSLFLNALAIKALPLGPFRD FLSWPLTFFHRRNLDSALSLLQP VVAHRLNNNFLDKNK  
PITTSNGSPDPKANAPKTQLPPFSNNTKLYSDSIDCIISLPTASSLG SNSRQISLQLLHNLWLGSVPVA  
HTITQMLYSLLSQPEYLDPLRTEISEMTQKYGWTEHALADLR LMDSFIREVGRMYPLTSP TPCRLTPS  
STSEMWRFS DGLVPPGTRVMWPGAEILRDEENFADDAATFE\*

>CYP5238E1|11492|Grascl

MEVNTLFSMFPLHFILAAGIVGPALATLLLLSPYPNGEHMFWKQQQWVGLKKQILARARATLR SIS  
QTQALISQGYSKAPETLQFSKANLPFAIYSMASGPVIVVPPAQLKAVMNQHESLIDVHNPQNETLQ  
AYYTVRDPDVYINDFHFNVVRNQLTRNLARFSEEIAEELALS FERYWGSSSDWTDVFAWQSLFTIVA  
RSANRVYVGKELCRNEEFLENSRLYAVSVFGAATVINLCPEFSRPVLARLLTLFGRRPLAICKRICKPI  
IEYRLEMALRAKSETAFSWDAPDDGLQWIIQECVKTEDPKQLDPNKITHRLMLNLVSIHTTSFTLT  
NVILDLYSSTPF EKYVEGIREECDCVFAEANGIWTRA AVSRLLRVDSAIKESMRLSGFGILGLPRRPRP  
SMPMLS IHTDESLYPKATTDFAFRFSRPREAYLA EQKT DGRGSGSSSIILSDGERVTVPENLGHGAIA  
PVSNGHEEADQSASARRILSKQQSVVSLDDGFLTFGHSRHACGRFFAAHEM KLMIAHIVRHYDI  
QRIPERPQSKTHEM KLMIAHIVRHYDIQRIPERPQSKTLVEVKLPDGWLK LKIRKKS GSCYGED\*

>CYP65FJ2|442|Grascl

MPSLGEAEGLDANERD HARFRLLANAFSEKALREQEPILQTYIELLIKHLHDQIDGPVGGVVDL  
AEWVNFMTFDIIGDLTFGQSFGCLESGLHPFVALLPGAARTMTYLLALKHAPQPIKLRLAADNDR  
RDFITPILKANDEKGMTYPELESSINLLVTAGSETLATLFSGASFYLSQNPQVMQKLREEIRD AFESPA  
DVTMGAVQSLPYLNAVIAESLRIYPPAALS LGRIPTHGGAVISGHQIPAGTAVGITSWAATHSPQNF  
TDPEEYAPERWLDDPRFNKDNRDASQPFSLGARN CIGKNLAYAEMRLVLARLAMDFDFELL PESR  
NWIMQKLFTFWKEPPLMIKLLRPTTTCTYLGV IQKEGHPPESCWVFELLLYFLFPCISTCYTVPFPD  
AFASFSFFKMETNPSPHVSLEKMADSVGEKSSNSVSESVTNSTPDEAPVLGQEIQQYPSALVRWVVI  
ALLLGEFLIALDLTIVATAIPRITDEFESIEDVGWYGS AFFLTFAAYQSAWGKVYKYFEMRYAFFFSVF  
IFGVGTLICALAPRSVALIVGRAITGVGAAGIVPRKVP MYLALVGMDFSIASVAGPLLGGVLTEKLS  
WRWCFWISLPVAGASLFVVLVFFRAPDSMKPTAATPREKFLQMD FQGTLTIMASLLCYMLALQYG  
GTSQSWNSGTVVALLVLWIVLAI AFGAEQWYQQERAQMVPRIMTDR TIIGLSAFIVLINGTIFLMIYY  
LPIYFQAIGGSSPAESGVQCVPLILAMSIALLISSAVVTRIGYFHP LMLIGVCITVGSGLIYTLDM DSTS  
GQYIGYQILTGFGNGICSQIPLIASIAFSKVQDIPLTTAMVLFKVYQLISGALSVSLAQTLFTN ILIQKLP  
IYAPTVD PARVIAAGASELRS AFSAEELTSTDTPSEKHTCWK\*

>CYP5039E2|444|Grasr1

MTTWYEAAYDLWLGGQYVWKIGELHKEYGPVIRINPHEIHCNDPEFIDNIYAGSSRKT DKYRFTGR  
RTQTKQSMVATIAHDTHRKR RGAMANFFSKQNV RNVEPAIQNSLNKLLWRMDRASRTGEAMPLS  
YVFKAAATSDIITKYAFGKSTNFMDQDNYNM PFFQAIEVLFTTSPALMHFPWLGPLLEALPVRVMKY  
LMPGVADMYKMRQGWMDQIDDIKNSPDM SLGKGTFEGVLASKLPNEEKETARLGHEAQLTVLA  
GQDTTAVYQLLANPPCLAKLKA ELETAFDPHQPI TFSE CERLPYLGGVIAECLRVHPGVITRMARV  
SPEVPVYERH GKRYVFPAGTPMSMSSMHIHFHEDYFPDPHVWRPERWVDNPRLDKYLIAFSRGT  
RNCLGINLAYQELYT LIGNVFRKYDLYDGT RTQKVPTMELYN TVRERD VDMNFDYIVPFP AKGSTG  
PQIKTHAAAV\*

>CYP5039D3|447|Grasr1

MESLKQLLSTDKTPTALVLGAGLAAWGLYFLALGIYRVYFSPLAKFPGPKLAAFTTLYQAYYDIVLG  
GHYFRKIDRLHVQYGP IIRINPHELHVNDPTFIDELYAGNAKKRD KYKWAGRSVLLPDSL VATQPH  
DLHRKRRAALNPFFSKANIRKLDPVVQHGVTSVLKRLEDCAKHAVVFPASLAYKAATCDIITEFCF  
GVSTEYIERDDYEHTYFKAVDHHLKMSWMMTYIPGVGPFLDALPPILMGVIYPGLKQLWMMHSR  
WTSQLDQIRASSKFDDGRTIFHG LLLNSDLPPSEKSNFRLRQEAQLLVL AGQDTTAYTLSSLTYQLLA  
NPDILRKLKAELAESIPDPNVPMNSADLEQLPYLTAVVEEGIRLHPGALVRQTRVAPEQALFYKDPS  
TDQPWLIPPGSPVSM DARN CNLNP KFFDEPLKFKPERWIENPRLD RYNLSFSKGTRICLGLNLAYSE  
LYMIIAGIFRRYDLYD GSGKQTTP TLALHD TYWERDAAVVS DCLVPFPQKGSKG IQVKVRAANEL\*

>CYP65FC1|453|Grasr1

TQAFSTSASAADLIRQAIFYCVGKAIYNVYFHLRHYPGPKLRAVTRLPYMYIQVKGTVLSSQKHLH  
DKYGTVVRTAPNELSYIGASVWKTVYGHQLFPRNNMFYGAAPNGVRSMNSADKEQHARLRKAF  
APGFSEKAIQAQRDIERYINLLIEKLEEEAPKSSQGKPIDIVSYLNWTTFDIIGDLTFGE PFGCLETNQY  
HFVWKNLFLGFKAISFLSVAQH LIPFKSLLYLFLPKSLMKKTIENTFDLTVEKVDRRLSLDVDRPDFMS  
NVRTLDGKDKLTKEIYSTSSFIVVAGSETTASLLSAAIYYLHMNPEVKQKAYQELRQTYTSDKEINL  
LSVAKLRYCSAVLDEALRLYPPVPEGLPRVPTGGREICNRWVPEGTFVQVASYVACHSKVNFEAA  
EEFIPERWLGDVRFASDQKEASQPF SIGPRNCLGQALAMAEMRLVLAKFLWKFDYEVCSES LDWLD  
QRTYLLWEKHPLAIVLKAR

>CYP540A15|661|Grasr1

MTIKNFYLIGQDKAAAFKHEIHIDQYHDFEALQLAVAGSYNIIDPNSIRFEDSKSSALQDLDEVLD CDE  
DIGITINGQPIRDPAGPEGLPVIGSYYEVPFDHLGNHALGKNNYLTNDPAIAGIALQESAFFTKLITT  
DHPLAGIKENRALFLGDTDT EAWRQA HKFLPPAMTPKAVRHYTPLMQACVKDSFKIFDTLDEQNE  
SWNAYQYMLKLASQTVFKFALGYDAHHFESPDSHIDGLAVLIAQSLALNKKVTSRGPWYSKLG AIP  
YTAANELKNTKAKLLAVLDQIIDNAPKGDTEDDLELNSAALGASCVV DYLK RATDDRGNKFP RDL  
VIPNMLVIAGAGFTTTSALMSWLLYSLCVYEGYQDRLLQEIVDAGVTENTKWTPELSDGLTFLDKFI  
KETQRVHNPAFQPGR TTKVDCIVPGGYKLPAGAVVVC AIIHAIHKNPKIWSDPDHFNPDRWGTEET  
KNRPKNSYIPFATGRSCIGFN FALGEVKVLLPELVRYEFSKEGEEAVTYDKAYELAKSF\*

>CYP5077C5|684|Grascr1

MVILQRILDALYADRGAAVATILVLLAYPAAVAIYNLFFHPLARFHGPKLWAASRLPFVYSLSTGK  
LIQRQRRFHEKYGEIVRIAPDEISFASERAWDEIYAFRRGHKRALRDKTFATAPNEDVDPLITTTDPK  
FHIRVRGLLSNSFTEDSLRSHLPDWQRILRGLINITDWINFFTMDVIGDLAFGEAFGCLAKARYYPT  
WESFLQRLAPRSLTEDALEHQRYANQQINKRLDTKTNRPDFTLTPFMKNNVNFENMSRAEILSTFNF  
VIVGGAETSATVLTGLFSHLSRYIKIQQRLCSEIRSALKREEDISIDACKDLVYLDAVLNEGLRMFNPI  
PSGLPRVVEGGDTYCGAYLPGGTRIGVRTFAVNRSSSEYFHDPDRFVPERWLPITKRPKTYHNEQLT  
ASRPFVGVFHSCLGRPLAWVELRLVICRILWKFDIADDAHCRVDFDDSPVIMMVQKGPVNIRVQVR  
EDHRKQ\*

>CYP532V1|810|Grascr1

MLQILADVLNHARTVFSLQLTLLALPICLIILHHFQSPLYRFPGPFTASFTNLRYRLIDVWRGSPHITLLS  
LHRRYGDIIRLGTHVLSFNSPDALGEIYGLKANFPKSFYYPQQILDPKGNHVGSLFVIDSKEHARM  
RKVVSGCFSLSALMRFSVIDSMTALFLEKTDEHFAQTGAECDLAQWLQFYAFDVICKITWGLEMG  
TMRKNEDVQGVFKSVERRFAYMAVVGGQIPSLDLLLLKNPLRLLSKLNLIHANAPIVRFAQNRLSE  
RLVRLKTESKSPAQPQPQFQSQFQSQPPNSLPKSEDPSQPNDLMSLFLHSRDLDPFTFFDTNRVLAMC  
MTMANAGSDTTAISIAAIFYLLKSPACYRKLVAEIEGAVANGTLATHEIGTGSRLGLGLGPLVSW  
SESQKLPYLDACIKEAFRLHPAVGLPLERVVPEGGATILGEWIPGGTVVGMSAWVVHMSRRVFGED  
VERYRPERWIEVETEEERKRMERGLFHFHGMGSRSCVKGWISLLEVYKVVPVAVRRLEVSAPVWGKG  
EVRGGGYGRFGGGAUVGVSEWMC\*

>CYP5519B1|814|Grascr1

MPSVFFRELLAVSGTSISLYAIAVALVVSLLLIEAYCSRESLPGIPRLSRVPVLGALPVYMLHDIPRTL  
HKLMTIGVDGISYAQIFNTVIVCIQNPMMAKEVLALPDEISSRLGNSGCISWSPFATLQRLIGNTLFSY  
VGPTLSHRRSLYIMEFMHKKPLYEKFDTMIDIATIHMDTVAGKESTAEFKDLQRSADDF AISLWGEL  
LYGNPNMHLNGVALTSLDKILEISTSPWSSLWHAFQRLLGTVTADEPTSEAKVRADMANLV DEN  
MAVLEAHEHHHPDTPPKLIRKISLKS GGEFSGPLSEFAYEFTHLNIFGGHHSIGSNITWSLIELNKYPK  
CLAKLMREIDSVHPNDFAA ISSKMPYLD AIILEINRLYSITVLLTMLDTLTPYRYPTVHSTVRVIDQEV  
KLTASGAQSVVLKPGMLVYLSLLHINTSPKYWGDDAGTFVPERFLNKGDDQDGRPFMSFGYGPRSC  
VGYKFAILVVKVYLITLLKSYTVEVTDLYPEVETGALLKTKKSICARICRRV\*

>CYP5094D1|1054|Grascr1

MPFNFGELLLLSTLACLIYVPCVILYRLTLHPLSNYPGPKLAAATSLYELLYDAILGRGGNLFYQKVD  
EMHDLYGPVIRVAPNELHIKDSFYTTLHANSPARRDKHHSTANATGAVQTTFATQEHD AHKRRR  
IAISPVFTKGSINRSYNMIMQQLAILENLRQLHSGKDVVN LHQILLAFTSDTVSHFIIGSSTELQTHPE  
KARQWESALQSLFEMIPLTKTFPTLIDVLLKLPKSILLALSPKLA AVIQWREGFFAAAAAEQKFNYLD  
SKPDSGSATEKTLFQAIQTSNLPPSDKTPERMGIEAESVATAGAETTVTALTHAIYFLLAHPSNLERL  
RKELLPLYFESKKQEPSLASLQELPYLPRALSSAAVELYTNAQRQQTAVIKETLRISPIITVRLPLLAHT  
ELQYGKWRIPAMTPVSTSILDVHNDPAIFPSPTEFQPD RWITADGKKSSEPDKFLVPFGRGHRMCLG  
YELAYAEIYLGLSMIVRKFDLELFETEW EQDVVKVRDCFVGLPGKDSRGVRVKVTGLRE\*

>CYP682BB1|2037|Grascr1

MDLTHGRLRDGSYTWEIEKMHKEFGPIIRINPLELHVKTVDLEFMSQLYPSVAKNVEKFPWF AELFG  
NTEMAFTTIGHNLHRLRRSAFQNFFSKASVRRLEPLL RDLDALCEQLLKRADTGQPVNLTYAFSA  
LTQDVITEYCYSDRRNVLGMDDFAPLYYDMVQKPAILTAINILSFIPRTLFPFGFSVVRARKWPYISI  
GKNTCAETFALSWPNTCAETFALSWPNTPRPTPKTLPKKPHLPMHPLQPNPQMRLFPTSHPNPPH  
PRLPRLPQKSLTPQSSTPSFPPTYPHPSALLSSPDLPPEKSLQRLAFEAQSLIGAGTLTSTHTLSTTFY  
HLLSNPPILTRLNTELSTHMPNPSSPLPPLSTLEKLPYLSAVVHEGLRISYGILHRLQRVHPDNELHFE  
KWTIPRGTA VGMSPYFVHTDPSLFPPEPREFRPERWLGEEGEGRKKWIFNFRGRTRMCAGRELAMGE  
IFLGIAAVGKRFAKEGEGRGGARMRLFDTERERDV DVV RDYFITFPSRESKGVRVVISSDERRV\*

>CYP51157A1|2236|Grascr1

MFLTYSFLLPNTGHKTLDVLLFIAIAAFSVLFV TYGITSIRFRLEKTRYGADRKGREPPTLPYWIPYIGH  
MLQMSDLHALYDYAASKSPDKSPVTLRIGSTTTYLIFGPDNVTALFKNSKHLERDNLTKRAFLNSN  
QNASTNPQSSEHIVHQPSPPSSPSTTSPQSQPQTPIDDPTAFRIGRKLHDLQHLHLSTPTPLPTNP



NKSHSHQIHPNLPSPTRRPHILSLTPSLSKIYWAYDEAFLLGLPELVYPIGNSLQDKLRDAVEKWISH  
GMEAYDWDELEKEKENEVWEENFGCRLFRDSVREMKERGVATGDMAGALLSLVWATASNSIVLV  
GWMVGWLVEDQELLKQVRRELEEGVRRALISSRGLYADKRARISDDNEDEVFGKDLKTAHDGK  
DGTFDLDISTLSFLPFLNSLYTESLRFHSSVTVTRRLTAPIEIAGYTLHKGNFVMTPSYLAHMDPNVW  
GSRNNDAKSISKFSSASISTSTFTLASTPASTPTPTLTPTPSKISPTSTSTSIKSADLSTTLPSPPRRFFAQR  
FLPSPSHPTSALNPSTFLPYGGGSAICPGRFLSQQQILSAVATMVLMFEMEFVSYAEKIEEGDGGGTG  
TSGEDMERRKWRTRNKRPEPDQRYAGGGVMPPDGEWVVGFKWRRGLGRD\*

>CYP65FE1|2250|Grasr1

MSSEIQTHYLTA PGQTTDNIVTTSDSKFHSRARSLLSNSFTADAVHAMHPLIEGHCNLLISRIGELVL  
QKPDQGALINMTDWMIFFTIDVIGDLALGKSFGCLENGDYHDWVRQLFQYVKMITVAAAPRYYST  
WIVDFVFQRLIPQSVLDGQNAHKRYADEKINRRLDSKLSNSRSDFMTPFMKHNANYQTMSREEILS  
TFAFLITGSETTATALTGILNHLVRKPEVLARLTKEIRTYFVREKEIVLDVLVGENLPYLEATINEGL  
RMCNPIPTGLPRQVPDGGDTYAGVFLPGGVRLRVQSYTVCRSAKYFHQPD AFHPERWLSKANGRP  
QEFDNDRLSASKPFVSGYSACLGRAMALEEMRLVISRLLCRFDISEDPEERVEFDDWPMPSFVEKGP  
MRIRVREKVP\*

>CYP548A31|2252|Grasr1

MTRKGINAKSRIKTMKRYVQSAEESHDDASELMKSLIKECRRGGLNDQAIAGCLALNLWAPSSPQ  
KYTANANEYRFIHWLAAYILHDPSSLATIRAETAPAFSTQPPNHKHIYESCPRTAVYNETLRCTFG  
GVSVRTTVVSPLTLQNKTLRPGCTSMIAVRELRELHSNPDIFGANVDRFDAQRFLGNDLDSKYFRPF  
ARGSTYCLGRLLAKRVSMVFAATMLERFEDEIVGRDGGELGEKQLGAETMRRRMLKLPAVDWVTP  
SVGIMKPAKGEEVYVRLSEREAS\*

>CYP596W1|2395|Grasr1

MSLIAENDSAPSISQIVVACGAVLALYYVRYFTVEQWHPDFPIVQLGEDGTGDDMADWLQNAKA  
VIEKGMRM TDGPFQVTSAFGPMVLLPTRFAHELNRNDPRVSLTKAISKAFFSHYPGF EAFVPADPNG  
RVVRDVVQ GKLTQSLGLITNDLVDEADLALSDRFPAKSEWRTVEVKEDLLQVVARLSARVFLGFPF  
CRNP SWLELSKSH TISTFIAASKLRRIAPYLRPFAARFWVPECKQIRQQVSQARTLLKAEIGLRRARA  
EKALAAGQTTSKRND SVGWMVEAAHKGRIKTDYAAGQLNMSIGAIHTTAEAMTRSLLDCCQHPE  
VVEPLRQEMLGALKEHGWNRNMLS KLRLMDSFLKESQRSHPGQLVNMHRMVTEDITLSNGTILPK  
GTHMDVLP GFDNPQVFREPQKFDAERFLKMRNEPNQDLSWQYVSLHASHMGFGYGEHACPGRF  
FATNEVKIALFFLLLRYDWEL ENDEPALMQPEDGV SIRPDLKLRYKSRTPEVDLISLIDAKELEEMRS  
N\*

>CYP5042B7|2438|Grasr1

MNTALQIGIGVLILLFCIRETLKPADQKWNFFTGRKSYKLPPGPKGIPLYGNLQFLYNRHPQRLTP  
YLTSLRTHGELTTLR LGSQTWILLNSKRVA AHFISKSGRLTNERPHMPIASGLVSNKRTVIRQTASW  
SEGRVMHHL LSGSVLKT YGNWMEFESL LNSYL RQPERWYAHHFRYSTAVLYRLVMGEKLDKS  
KEELDKYQQVTMEFVRSIGLSVVDFFPELDMWVPKWMQPWRRFWSEMGRRH RGVFVDWWTPIYE  
MVKKGEGKAGFVRD TLLHPEVKYKGD EEEAMYLATS VIAAGGDNTRMSLNTFVMSMVSNPEILK  
RGRAEIDRLCGADEGKLRLPGADDMEQLPYVSAIIEVLRWRPTVPLVPPHQLTEDIEFEGYVFPKG  
VSFVLNTISISQEYENWDDFNPERWMDGNEDNVTHDLWAFGGGRRICVGYRVAQQALFVAVARL  
IFCFNITARGEIDNKNL NHVSLNEPFPVQVTVRSPA HETLILSGFDKAAKEESSQKMR\*

>CYP573D1|2821|Grasr1

MLSKADPIALPDIYHRQVNKSPFYANGSFGDTDSVFD TQDWRKHADLRKMLAGPYSFSSIKNESVE  
TGKAFDFANWATYLVFDVISEVAFGKALGFTEAGSDVHNLIKSWHDGLWAFSVLGRLYPMTQWIK  
KTPLKRFIVANPAQPF GIGMLMRMRDEIIEQRVRDLEEGKLQNQEKVDLLQQYAFSFPSPYPWPCFL  
PQPLKHQPKTPTNLPSPSSILNSRSTGASLPLAQIKA EVLLIIIAGADTTATILSALLNRLSTSPSLYTR  
LQTELTSAHSLHLLSSPIPTYNEITTHLPLYCATIKETLRLSPAAPLVGSRMV SPEGLTLP GGWKVPGG  
KGIEVACNPWIVNRDKGVWGEDAERFRPERWLEEKEKV KTYNRYLMTFGYGTRVCLGRELAMME  
FVKSGVTFLGGFEVRWEREGKGEGDGAGKYKTRGGIAWFEGVNM RIGERGGRKRE\*

>CYP677J2|3079|Grasr1

MEHTQRELHRKHGIGYLPVLHHLQAI ADEVGHLVRIAPNEVACSDPEAIKTIYSTKNVFTKSDYYD  
AWVPPTKRHVSHFAVRDEKLHAERRRIVNNVYSMSSVLESEGSIDSCTEMFCENMRDFAKRKSAID

LSLWTNMYAFDVVGELFFGSKFGFMQERTDIGGYMKSIDSLLPAFTIGGTVP SYLTKLCLVFTILFSSSI  
RGALGAVKNIKTVSKVAVEKRRREVDKNTDDKHDMRLKMLQINAERGEKLDFTISDINVESQGAIF  
AGADTTAIAMNSILYHLMRTPRAYKKLTRIVDDAVADGTLSPAKYAEAIKIPYLRACINEGMRLH  
PSVGLVMPRIVPAGGATISGFQFPEGYRVGVNPAVVQYDEDEDIFGEDADQFNPDRWIEGDIVSMEKA  
MIQFGAGTRTCIGKNISLSEIYKLILQLVRDFRFLVEPKRALRTHNYWFNKQTGIWVLVDERFQSSD  
SHIEQESAS\*

>CYP51168A1|3326|Grasr1

MSLTSAWAFRPEICALAVRPEICALAVCSSVLYIGALVLYRFLFWHPLAAFPGP KIAAVSDLYGIYHDL  
YRSGQLPKQMPKLHDIYGTAFYKDWSFYNSRAFEHSTLNILDTPSARTRKDAYIRLFSKESISKLEPRI  
NAHIDRFINVL YEAGTKRQPV DLSQGFKCLTADIIFDFMFQEDFGGLSAKNFHHPLIAPTDDIVIFAE  
WGFYFRAIFHPVEILVDYIPDSILRVLFPPALGIKT LINLCRETIQNLKRKPLTDPKMTQT VFGALLNP  
TSSKTSGITDEAVLTSESTFMLLAGVDTTANTLVTAVYAMLRNPEMHQKLMNELTAAFP GYSSTD S  
LTFERLQSLPYLEACIKEALRLSYGAPGKLPRVVPSTGHKAAGLYIPPGSIVAHSSYTYQTDET VFPSP  
TEFKPERWLTGNATELDRFLIPFSKGNRSCVGIHLARTELFITLAKLMLSVNMKVWKTTPRDM EW M  
YYSVTVHRGHLKVIVEISHDEIAVYTDNE\*

>CYP5078J2|3380|Grasr1

MAKANFSIPYMGSVPF SHLSSSSGGANFMLDIPYVPTSVLARVAICLPVLFVAYGIYLR YFLGVSHIPG  
PFIATFSNYWKIQAAWKEEMPQQNIELHKKYGPLVRVGP NMISVDDPAALGSIYGFKPIYQKSAFY P  
IVEAIYKGRFLANLFTTTDEKYHARLKRASVNAYSMTTLNELEPHVQDVIQLFLRRIDEVTDNGQKP  
FDIGNWVQYFAFDALGEVNFSSQLGFLETGTDVGNSIATIDGLLRYLSIIGQAPWIHKFLLGNRFIHK  
LLPFLETSNEVQNFAIKMINKRVSGEQSDSRDMLARLLEASEKDDARLTREEIIALTTTNLIAGSDST  
AIGLRAILYFLCKHPAVYSKLQREVDDAFAAGSLSQPVRYADGAKLEYLNAV VTEALRAHAATGF  
VLERHVPEGGITIAGTHIPAGTIVGINSWVMHANKKVYGEDAEQFNPERWLNASEAQLREMRRCN  
MSFGAGPRICIGRNISMMEIIKLIPELMRKYDFRLVNPDKWEILGHW FVKQEGIDMYFNKRNLGEK  
TVRASA\*

>CYP6980B1|3505|Grasr1

MGAKVYILTSSQDISAAYRNITTL SFDDAVNETMRSFGFSEDGLEKLWRRDYAGVYPNP SKKHFAGI  
SHDIYKSQLHPGDKLNHLTHRLLSVMRKNLLWENLP SAAILQERASSKNMSLMALCYGGLLDAA  
NTAIFGSR LNEISRDPKHFRVFDGKVWQLLFQLPAPFAREMISAKMEIVKSFEQYVESPLETKADR  
AWFIEALETEMAALNMSVKDQATMFFMLYWL FNVNAYKTCFWLLSYILTPGLLSSIRAETAPAIA  
ADGGVNVTRLVNACPYLTASYDET LRLALDVASARNVMEDTMLNGRLYRAGSKIMMPYRQLHFE  
EAVFGSNPEAFDPSRFLKNKDLNRNPSFKPFGGGSTMCSGRFLAKYEVLSFV ALSINRLELKVADGE  
GEAQQRFP RYNRSKPGLGIMEPVDGDDLIVEVRRRRT\*

>CYP53A65|3583|Grasr1

MALHDILFSPWTL LLLLPI LFYLLPYLRNRTLIPFPAPPLAAFSNLWLL LQSRRGQRFLSVDRAHKKYG  
TFVRIQPDHISIANPDAIP IVYGHGTGFLKAHY YDAFVSIQRGLFNTRDRAEHTRKRKIVSHTFSARSI  
GQFEQYIHSNLSDLLKQWNTLSDTATKAGKAYADIDSLHWFNYLAFDIIGDLAFGEPPGMVNVGA  
DIAEVRETPTSPPRYAPAVQVLNRRGEVSNTLGSLPGLKPYAKYLPDPFFSQGLQAVSDLAGIAIARV  
KARLEQERSGIKSERRDLLARLM EGKDERGEPMGQAE LTAEALTQLIAGSDTTSNTSCAFFFWATKT  
PGVMENLRKEVDAVLPEGGIPSFELVKDLPYLHRAIDEALRIHSTSSLGLPRVVPPEGGEVEVC GKWF  
PQGTVLSVPSYTIHHDRGIWGEDVMEFVPDRWLEGR LTERQKGAFIPFSYGPRACVGRKSILMSADE  
FEKKILTAVVG NVAEMELALIVSTVVLNFDLELRQDTLETREGFLRKPLGCAMGLRKRVK\*

>CYP654D1|3989|Grasr1

MTAVRDEIMSVFKVATNLSSTPDALWAAESDLSLYLTLKHIFGYLALVATVSWVLWQPLRTPDKDY  
LIPGVYVVGSKKH EVKATSARFRAESPELLLDGYRRTKGQEPFYVLSARGPRLIIPTRYMEELKSAP  
MDQVDFTGIVHEMLEYKYTGLVDRSRMIPSTLSRMIPSTLNSHLTPRLPNIMPEVQDEINLAIDHEFP  
QNDDCCVPLGTEVDVMPGITRMFAKATSRMVGGKAMSQNEEWIPVAINYTLWSFNAAQKV KSTP  
WPIRRMITPWFEKVRKKIPWCFATAVKVGVPILEQREQTGEIANDFLQFLTETAKGVQTIGGILYDL  
CQYPELIKVLREEYEGIVDRDGNIPKGGYAKLVKMD SVMKESQRHNPIAILTFERIINADRTLKD GFT  
IPAGSYIGVASYNIAMDPEIYPEPEKFDGLRFERLRNDPAWTNKASFVSSNAQSLAFGYGRHACPRG  
QFMEQEIKSFLVKFLTNYDIKF KDQGQTRVKSTPLEVQLVLRHTPILLKRRNL\*

>CYP59X2|4262|Grascr1

MLIGSSDETQVQQTQEHSPLPKYPALKSFLQPIADGQDIVTMEGATWKKWRAIFSPFSMSHLATLAT  
AMVEETLKFQCQTLDLRAQNKQAFQMKPLTDFLTLDIIGRVVLDVQLNSQVGSNPLTDGLRSQVPW  
LIFGGDANPLAKLNPPRPLVLWYNAWRMDRYIAWILDRHLADSRTETSRKTIIDLAATAYLSANKD  
NDISTGIDTTFKSFASSQVKLFLFSGHDTTSSVCYLFYVLANNPSVRNRMRAEQDKIFGPDIKSATSV  
IQSQPALLNDLPYTTAVVKETLRLYPASSTRAGEPNFNITDQHGRLYPTDGFLIWANHIIHRDPA  
YWPEPDEFLAERWLVTSPDDPLYPVKGVWRPFERGPRNCIGQELVMMEMKIILVMTARRYNIEAA  
YEEIDGGALGSKWNTVHGERGYQIQRSQPSGDLPCRAIIETR\*

>CYP684N1|4399|Grascr1

MELQSNPSQHLLLLLYAVLGLGLGFLFVRLAIRAYAGPAASVPGPWYTRWTNLPLKYYSLRARRTQ  
WVHSLHQKYGPVVRLLKPSEVSISDVRAVREIHRISTPFLKTDYIMRLTGKGVLPGLFTFSDPKEHSAR  
RRLLAGPLSESSLKNVEPTVNKNIDKAIEGIRMENKENGTAIDFKWFTFMATDVIGELSFAESFRML  
DQGKPNQYSHDLHAVALATALNSELGILTHFLGALGLSPFRQAYEATGRFRSYSTESFKRYEQHVA  
LNPTNPKPTLFTKFIQKVEGGEESLPRTALIREGQGYIVAGSDTTAFTTTTLYVAVTRNREVMEKLVA  
ELEGLPEGFGWEDVRHLPLYLNKCIDEALRLYGAAAPSGLPWVVPKGGAGHLAGYTFPEKFVYSTQGYT  
LHRDPGIWPEPERFNPDRWDAPTQQMQQAFMPFGGGTRICIGLHLARDEMMAVARFFRMFPHA  
RVTSSDDDDMEFRAYFLATLKRKRCMVAAS\*

>CYP5589C2|4661|Grascr1

MTSYAADSSNNHHFLPCLVALFLTCCFALQTRSTGIYTKFQRKRRFTIFNPFTVKPAHEVVATGYNE  
VIKRYGAPFTMQWWAKDWIILPPKYLPGIRDADPSHLNFLTISDCFYLHKTVGRLYAGNRMAHV  
VKRGLSPKLPLLTPKLLEEMDYAFAIELGDPGHGKSFVAQRLLSRIAHRAVRASRIMVGHELCRNEMFI  
NASLEFVMSLFGTALVICKLPLGPFREVLAPITLWHASKLNKVEKLVPVVRDRITDWQAGYGQS  
EQLDCIQWTLDLMPTEGATDTKVISQELIHNWLWAGTSAPGGLVMDMLFQVLLPHYLVPLRAEAA  
DAVHMFGWSEHTFNHLTLQDSFIREISRLYPTGSITVTRTVYDRPFVFSDDLTPVATRLAFAAPIL  
HDESTFPNAKQFDGFRFARQHTKDNDRKVGEKQNSSSSMSTTNLAFGYGTHVCPGRFFAVRMVK  
MIFTKLILDYDITWEGHVTQRPPPVCIQGQFIPNLKQKIIKKRV\*

>CYP613U1|4665|Grascr1

MDRKVINANTLSLQNWFSVFSAFASACGLLVILPKLRKHVLSRINRCLSFLINQYLLFKYPICHNETG  
RSIPTCPYVFPNGQGNVAKFLEGLSNAGEWSRQYGSVYRIWSGKPEIVLSRPEHVKAIFYDSRHT  
KAKDNNSGYLMHQILGQCLGLISGKSWANLKEVVQTPFTYSSTTNHVQLVQRMVAEYIQELFDSK  
TADELHPANDLKMLPFWITAQIIYGDLTPAMKTELQQLATARESIFRHVIRGGISRFAISRFLPTQTN  
RDLSSFLRRWQAFNDKAAAAAETATKTTTTTSTSTSKPPPPPPITQMYRSLHNGTSTRPQLLQTLDE  
ILFANLDLAPFTLESSRLHPAAFSVPQSAPTSRLLDGFTIPAGTDFIVDATTNLTNKEFWGEDAGEFR  
PQRFLEGGGEVKEGKEGKREMRYNYWRFGFGPRVCLGRYLADLILRAVVAELVGGYEIEVPREWQ  
EQGGKGKEKRVGDGVWISQADVRLKWWKRGEKGEGG\*

>CYP65FV1|5047|Grascr1

MMSWNGIQAGMRKALYYVYFHPLAEFFGPLLAASAPVTIATFQGRSHQWAAQQHRRYGANCF  
HTHSQTKRYGSRNPFYNSYAHLLVKQLREESKDKAEDVDMVEWLTYATFDIISDLSLGQSFGDLER  
KQAHWPVNNTFKSGIKQRVLFANARAIGIPFFDSTIARWVSPHQRKRHEQFEYARAVVGTRLQDKSR  
RTDFVSNFIRENVMGVSVSREEIDSIFIIVTLACESPATALSALLHLLSNPTSYKKLQDEVRLPTDK  
DLTITNISQLPYLRAVLDESMRIYPPVPAAMDRVVTGGRTISGYAVPEGTWVGIPQHATYHSEH  
TKPNEFLPERFLEKHARIFEGDNRAIVQPFSTGPRNCIGQNLARAEVRLLLAKLVWHFDMRLADEA  
EDWSGKQKVYGLWDKIPLIVKLEAR\*

>CYP619N2|5107|Grascr1

MEALILILTALLVLLVWPYPWLAAYRDKLLPPGPSTLPFLGNLHQIPRTGLHLKYTRWARSYGSM  
SLKIGQGTMIVLSSALDAGRLLDKRSFHYSDRPSHVGDLVFGGHHMFMNANERWKLRRKLYH  
QMLQEPRCNREHIALVEAESSQLICDICLLPDDLMLHPGRYSNSIIMSLVFGARTPRHDTPHYLKLR  
KIMTELSAIGEIGATPPVDLLPALKYLPEQLWGNWRTRVRDLRETIFDLRPLVDSVIERRKMGRV  
NSFLDGVLDQQDDMQLSRDEIDIMCGNLEGGTDTMATLILTLQAMALNPLILEEAHTHIDSVD  
DSRLPTWADYERLPYIAMIVKELLRWRRPPAPTGFPHTLDKDDEIDGMKLPKGSIVVLNIWGIHND

DRYPKPEVFDPRRFQNTALASVYANSSDYQRRDHFGYGIGRRICPGVHLAERALWLATARILWAF  
NIQPKSDANGKQVPINVAPATGYRDGFLNQCMPFEVEIEARSAXHREVMMLAEVTRSEAEILTVYA\*

>CYP5105E4|5167|Grasr1

MAFEALLEICFVSILVYSASLVLYRLILSPLAKIPGPKLAGLTSWYEIYYDIVQPGQYVWKIKEMHAKR  
NLRWRFSKSEIHIADPAYLDEIYAGASRNREKEYEQLRTLVPVMSMGAARTHDLHRKRREALNPFPS  
KKSVDLQPMVQTKVGKLAEVFEKHKRSNTVVNLSSVYYAVVMQYSFGQGDNLDDDEVKAATLR  
KNITDLLLGVKVSQHFPWIFTFLNALPFFIAKHIMPPGALDMLAFSEKIRRDINRVLEAKTSVEKDRK  
RSIFYELRDNSSLPSEKSPKLEDDATLLVMAAFTHAAKGTESVAVTIATAHFYLLYLPDYMAKVR  
AELRTVPVNASWAELEKLPYLTGVLLESRLRIDMSVTGRLARLAPEETLQYDTYKIPPNTPVSTT  
LCIHTDENTFPDPWTFKPERWFGREGTERKRYLMSFNKGARQCIGINLAYAEMYALAAAVRFEM  
ELYQTDESVDVRFKHDFHAAFPKLDKSGIRAFVR\*

>CYP51165A1|5300|Grasr1

MFRQIDVKWIAQLLVAFGASLYCAQLPFIYRFILRCSLDFQPFITLFLSCTCAVLSLLLQVISLLFEHPG  
PKRLPGPKGLPWIGTALQISLNRIDEWHQKYGPFIETVILGQRYVTIGSESIABELLKNRGSISDRHY  
NAVLRGQPHLPLRMGESWRRQRKLFYQFTQACTINAPTTGSIYAKVVTREVEKLVRLNVGHPED  
WQKIIDGYVSSISLALTYGKEIRSYNDHNVRRIVEHYRNFENASRPDYLVNLFILRHLPAPLAPFK  
NSGQEYLQAERAYLFIALAQVQHKLDAHIGTNDRGQKKPEIDSASSNWCLAQENWQNEERWDA  
QGLTLEEAAYTLGSFATAALASSPAVLKTFFLAMLHHPPEWQQRLQDEVDVRYRDAAIHRKESTEQ  
LWTKKETFPVARAIVKEVLRWRPTLPTGFPHILTQDDVYDGYTIKKGTMVLWSQWHMAHDPISLYA  
DPHTFNPAPRHLPCTSLPLSLANDSSFGFGRRACPGWQQAEDMLLAAVISIARSLELNRRERDEKGE  
VGKLPWVEYEGGSTTRPRWFKVEIRRRGREDKET\*

>CYP59U4|5662|Grasr1

MEALAGSIQFNKGFSSETLSSLIPGMVEATMTYCDVLSLSQNAKLFQLDIVTLRFTLDFIGQTMVNA  
SLGQEEGNVLADSMLSQISWLAPNKEINPLEMINVPRFLVLWWNGRKMMDRYIGQELDKRFLEYRQ  
GGSSARGSVIDIVLAYMNENTEGNTESTISEENIDPLFRFTAITQIRSFLFLGHDSMSTICYAIYLLSK  
NTAALESIRSEHSRIFGANPDPSVADMIRASPYLLEGLQYTTAVIKETLRLFPFGSGIRQGFAGADLI  
GEDGTHYPTENTLIWILHTAMHNEETYWVNASSFMPERWLVDPGLELYPRKGAWRPFEWGPRACI  
GQNLAMVELKIALAMVVRAFDNFIAIDEWDAMHGRQGGEKLTyrGERAYQVEIGASHPADLMP  
CRVSMAKIK\*

>CYP617Z1|5774|Grasr1

MAPPANVVILAPAVAYLLFCAYQRETVAPSNSTLDVVFVLLYAAVSLGLWTVVIRPRFFSPLRHLP  
GPKGGSFWHGQLWRVLKEPAGTPQREWMATIPNKGLIRYLSLFNQEKVLLTVPSTLSEVLVSNTYD  
FSKPAHIREDMYQRKHLQPAFKHRQIKDLYPIFMTHACRMVEKVDTEISAKARNSEVDEEGYTLVP  
LRAKIHGTLMGTIGKAGADAQLGALDDRD AEINRLYGKVLSSGGAVRYLLTVLSTLLPASFCYSVPL  
KQNKALNDAGKEFRVLARGVVSRRKTRKIKDPDNDPNDILGVIIDGQAFTDEGLEDDQVMNMIAA  
GLDVTSAVSWGLLTLCQHPEIATRLREEIRQHLPSPDKADGMKAITSDVVDGLPYLNAFCNEVNR  
FFPGVPTTTRVAIRD TVISGQVIPKGTTLVISPAAINKDERFWGPDASHFNPERFMKPGQANS GGAN  
NHFANLSFLQGSHSCIGEK FARSELACLMVVVGRFEMKLGPSGKLPKARPGVNPPIEGELELRRA  
VPGW\*

>CYP6481B1|6125|Grasr1

MYPSTKQIRRAHFGNTGEPFIIETAGQKMYILTSADDAAAMYKNTADFSLDEIHKIVHRGIANVSPRG  
FELLWPKRDDGAVKTIATNKDGFTYISTRLLHKQLFFGAPLENITERFLNNIESSTQWD AFFPKSVLA  
QDPKNDERVVSIIHQWTLVLVNAVTRSFFGDALPNLLPDISTIFDQWDMNSYMTNYQYPAFLSQA  
AIVPREKIIRALTQYFDLPHEERND AIPFIRELEEEQHHRAGLSNEDAAARLMIVHWGTIQQEITAAITP  
KQSPTPASTSSTTNLNRSTTPVSIHSTHTNSCPHLNSLFDITIRITSTTHIRCAHNPNVHIHNKLIPAS  
ARVIVPVRQLMLDPSGFGPDAAELDPERFLRTKNLERSPYRPFGGGEYLCSGRHLGRRAVLGFVAI  
VLWRYEVGVVKEGESVMGVRGKKFPRDLGLGKPSLGISMQVEGDDMVVVVRPRVGMGEGEGREE  
RGGEGRGGGEGGGGEGVSDGVGDISEHVRGSI\*

>CYP5603B1|6346|Grasr1

MPFLDRKPYANLFSLQDSYHHAALKRSISPLYTKTQVQNYESRIDSCTMLFAAKLGDICGEGSKQLD  
MAFWLHAYAFDSLGEINLSKKLGFLDTGTDVGGMMAAGEKILHMTGLVNSLPDTWIPEHELTNS

MVNRLGCKSCSASCEICEGEGKIPFWRSCFDTVAYLDQFAASELSQRVEKPQDAHDL LSGFLELRES  
EPTRISIAEII GALYINLPDTESGTGRAEGNPNEKKVQRYSRLLLNQSSRQAGHDVLA VTLRILYLLA  
RSPATRDKLRLEIDDAARLT YSEPIPYAVIARLPYLEAVIHEALRAHPNTGLILERVVSRGGATIDGY  
DIPGDTIVGVNAWVLHRDREIFGEDVDVFRAERWLEADKKMLQGMKQNLFSFGAGPRMCIGRNI  
AMMQTGKLLAEFYRRFDARLAHPEREWTVNGSWVCSQSDMDMIVSLRKGSATT\*

>CYP531M1|6385|Grascr1

MTLPNDVLVNGQQRVSNLFSTRDEDWHNSSLKPIRSLYSMTRALDVEVHV DKMLED FMSIVEERFVK  
NGKELDAAEYIPFFAWDSMCNMTFGKTYG LLETGQDLNNVISTSTRGLE YFAPVSQMPSLDLLLAK  
NPVKS VGPPFIWATIESYKAVAERQLEPTQIAFSRSDSDFLDKFLVAKKEHPEIVTDDMVVNYLLSN  
VLGSDSTAIYACAALYILRTPGVLEKVRKDLDPQKV KVPVSWKTAKQLPYFDAVMKEAARIHP  
GIGMLERL VPEGGLTLPDGRFIPEG TIVGMNPWVVNRSEKTFGKDTDKFIPERWLQQPNESHEAFE  
ARKIMMKAGDFTFGGGSRICLGKSLAILQAYKLIATLFTKYEVS LARPDEEWQIRNCWFVYQYNIPV  
KLTPRTVV\*

>CYP65FL1|6555|Grascr1

MKERLYFNLYLFPLLPGAVIVGA AVFVMVCLAKWIRNVFFHPLSKFPGPCLAGATSIPLLFHRSRGRL  
PHWLAKLHAQYGPTVRYFPDGLSYIDHNAWNDIY GPRRKGGGLPKNPAIALPMFGGTDSMIFMD  
DENHNRIRRLLSHAMSERALREQHEVILGYVNV LIDRVKATAQGLDAGEIDLVRWYNFASF DIIAD  
LSFGEPMGMLQLGEWTPWIKAINDSMPFATLVQV ASRCLPFLGPVLNLSLARMREALVLNLSLAR  
MREALKTHIAYSRTQV NKRRLARKTDRTDFWKYILREQRSQGT AIGVSA AENHALGMTLMVAGSET  
TATALSGLTDCLLNNPDKHEKLVAEIRNTFNSPAEMNEESLARLPYLGACIEETLRLHPPAPVGLER  
WVPAGGHRICGEFVPAGTHLLIGFTHWVAYRSPALWHRPEDYCPERWLPESKITGPFTNDVRQVL  
QPFAYGPRNCIGKNLAYNEMRLIAAQMLWHF DLELSGKSRNWADQKIYGLAVKGPLIVKPKLAK  
GVEKTL\*

>CYP51196B1|7072|Grascr1

MQLFPVLTALAVITVSSYFFRLGNSYRQARKAGLP IFITFVHPHDIWWIILRIPVTQLLKKILPHSLYL R  
FELTTYGFEMRTRTIPYEKLGQSYMLVGPGAKELWVGDPDMARAAAANKDIQQSKMAHSTHSLDI  
CLETILTDVGFTELF GPNILTAQGETWSRQRKIIAPILNESISESVWIEGAYQATDMLDSL TESSTNGHS  
KQLVKQDSAESIEGLRRIAINVLGAVGYGRPSW KSKDEVPPGHKLSYMESRSLFSIISHLALAVFIPP  
SILCLPIFRPDIQKVGI AKREYPEHNKEMVAHERKTADITKNNLMSVIVRLSDQEKNA MSKSKLYLSE  
DELSGNLFIFTLAAFD TTSNTMAYAFTQLALHPELQDWIIEIDQVLPNTKEIPPYEEAFPR LKRVLAL  
MFETLRLYTPVPHLARETKVPLTLPSSSGTRHSIPADTNIYISPAL THVCPLYWGS DSTTYRPSRWIVTS  
DDGTTSLFEPPKGT FAPWSLAPRTC PGQKMSQVEFVTVFANLFRRARVEPVLMGEETLEDARARLM  
KVVEDSQPLITLQMNRPRDFIVKWKRE\*

>CYP526B4|7091|Grascr1

MSSVVFSEVPGRVLVASLDTTIIAIALTATLAILLYGLYQWLLPKVPRIAYNPGAIRSLLGDAPDMIKE  
VSVTGEFRVWCARQVIKMDSPICQIFIKPFSQPWILLAD FRESKDILMRRKEFDKSSFLSDGMACMG  
AFHGIYKTGDKFKSNRQLIQDLMTSTFLNSHVGT AIYQKGLEVMKLFELKMKLANGRPFS AKKDFE  
YASLDVMCDFAFGSNWKQTATGPQVDLLKKIKPSEVKAGDSDEPIEFPLVPLAEFLESVYEAPELVE  
RTINAVMPKLQSL SCKRGGGPSSPGHVETGLEHMLMREQARA EKLGRDPDFDSAMFGDIIGGHHT  
TSGAMMWMAKYLTDLPHVQDR LRSVLHEALSGARDENRLFTFEEIRRVKLPYLD AVIEEMLRINA  
VTVTREALCDTTILG CPIKKGTQVFFVSNGPGFLSPSLPVDDSKRSENSRVAKLNGTWDET KDLTIFD  
PERWLVRKRDGSGLSEHDVDFDGAAGPQLVFGLGPRACWGRRLAHMEIRTIISMLVWNFELL RTP  
PVVSSHAGLEGIARVPQKCYLRLRKV\*

>CYP6577A2|7424|Grascr1

MAETMFNNSSHWDPVWTL SLSPLFGVAFLLLLEKWFLSPPSTLPWIGQKAGFFPRIAACLREKNEGI  
SDLKAGYLKFGSKGKFFIKPDMVFKPGIMVPREHIRWILDQPPDVLSVHEARYDKFALDIVNPGHD  
EAVDGVFLDV IHRKLTRNLLKLQGD LAEEVSRNMDAVLGTDTENWVESNVWSTVENTVSSAVMR  
ILLGRSVCREASLHEDIRRYTRAFGYSSIFVGRILPRFLKPF LGSILSGLTLHRQRNLLRKWFNPMVEER  
FTNLLKKNQDPSYDYTPPEDLVTWAADALLCTGNAERCPPSGLSRR LAIMIPAALPSIKSTATNAIF  
DILSAPPEMNLQDHLYNEVASAFDTTPEKGWADQSLLPRLVFLNSATRETMRVNPIAVVVAERKIL

PKEGVTLPSGQHLPQGTWLGVP TVGVQSDENNYTNAARYEPFRFCNRKPGEEADSKDASGPVIST  
GMVNVTD TYLPFGAGKFACPGRWLA AHVIKLTIA YLLYNYEIKPYAVRPLNSAIFGTNLPDRQATM  
MVRRRKH\*

>CYP51160A1|7425|Grascr1

MNSVKLVTEVLHSDAKSYELHMNIYVYILSVVVIFLRAPSLVKSVRPSLSLSKKQRDRKNEPSKFSVP  
PLWMDSTLGMVERPRCFFDFLLSRSSSGEASFLQPGSLVRDSL AHTDEVVEVFQRSKKLTTREYSAQ  
VLQRSNQALNNRSASQTRFSSQPKSSEISRADQVWEDFQEVSDTNLVAKDSVALIAQH FVGGGLVAQ  
FDQFPRGKWSLIGVPKLFQQHMLEASIRTLFGPSLTKDSPLFSECLWKYHKAITACLTPSSDFCHKTF  
WETRKECLEAVKAHLRKF WSEFDMQEV DATHGATLGSRLLREREQALTKANLSFDERAQLELELL  
VSIESKTIPLATYMITAILQRPD LHGRICTELKKA AKTASRGTLAFDHAKLEQLPLLSVYQECLRFH  
SSHHEAWQLEQEIKL KNSALKAGTVFLCPSYLAQYDGTWDSA EYQSDVFWPERFLEEKPYHFGM  
HFPYGGGSAISSDHHYAKQEILSAVAVILAKFDFQVV SFASEPLEETKEEMERKICAEAR DERGLAVR  
LRRR\*

>CYP51203B1|7426|Grascr1

MFNSIVAYSLVLLGLSICYILYLEYFPHRLPNSLPSVGFRKEILSRSRASLRQILGTSRTLAEGYEQYGAE  
NCSYVVPD TTFQPQVMLPQVHV KWLSTQPESVLSSQAVRMVRNGVNYLPTNLDPKSSLLFIDKIIG  
QSLSQSLDLIQPDMFDEIRHTVDIKLGTDTDSWHDIDLSDAMSNIIDRTANRILFGLSLCRNEAYLRIL  
RCFIICMGASTLLIGQLPPWILRPVAGVLLSIPTFVTKKMSIAYVQPLVKERMQEVKPKDKDSGHSKT  
SHDFVTQSVKSVKKFKISVTGDVTTFLAEQFLILAFAGMATTGAAATNIFLDIFSANPRINLWENLRL  
EAASIFKSEDNWTSPALMKDMIKT DSTIRESLRKNTLQSRGLLKQVMPKSGITLPDGT HVPQGTWL  
GVPVQAMQRDQRIYPNPHEYDPFRFAQLRAAGEVEGKDDPSTSKNLDAAQPSDVYVSFSYGRNSC  
PGRWFATRLLKLMIA YISIH YDIKPLAHRPRNFSFGDASIPSFTTRVMVRRRQ\*

>CYP59AB1|7427|Grascr1

MFFYRELLQAIPSIMSKFNVNIVRMVDMSELCLVAKAVTIAITIIIFLYRLYRARSYMRRLQREGMPMP  
PHHWLFGHILVVARVFIALPPHAHLLLADQVRRAYPHLDTAFYLDLWPF GPPSLWAVSPELASQF  
TQENSLPKYEGVRRFLKPLTGKKDLVTMEGHDWKHWRAKFNPGFSANNITSMIPVMVEEVRTFQE  
IIRKHAITGDSFLEKATLAMSMDDIIGRVVLDHELNSQKSYNPLTSGLIDQLAWCDAGMHSNPLEYI  
NIRRYETANLRPKSKYPADLIMSAYLKETSSDGRPTKMDPVFSEFMRAQVKLFLEAGHDTTAASIVF  
TLYMLQKHPERLIRLREELDTVFGPDITATCDFLKNPHLLHHCSFLLAVTKETLRLFPPTATARFGV  
PDFYL VNTDGKRLPTENCLV VANHYGIHNP RYWP RVEEFLPERWLVDETHPLYPVKNGWRPFER  
GARNCLGQELAMTEIKLVVAIIVREFNVH DAYTENDAKKGQTKKNLRVNGERAYQINRGGGHPSE  
NFP CRVSLVAGKEAN\*

>CYP51166A1|7476|Grascr1

MNDTPVYVESGQPHTYNIHPYTENAWPYISSIYPYFDSLPLGTITWTTVLGCFFAYTVVHICGLLLRR  
LVFSPLASIPGPKAAAASRLYELWFQGIHHLKFPDEIKRLHSGYGPVIRISPHEVSINDSRFNIEFFNSG  
QLDKDPKYA AFGFDDAVFVLS DNKKWAERQTVMANHFRGKVWQEFPQLRRELD SLCAKLGKV  
AENKTD FENISRGFRKTSNDIMRTFLLGDEYSGINANSRDFGPDAEPVFHPLFRMVAFTRVFKWMFT  
LHEYMPDIVLETLLPMAKYKREIDRMVRS LVGNYQP EEEKLIQDKALFYRMIDSDPSYLERSGVAAV  
EEFLELLWGGREVLGHASSNIVFHLVKNPQVMEKLHTELLKVPFDLHSAPYSQLKTIPYLVAVCKE  
GLRVQLGGNFRIPRVTRKDIYYGDHLLPAGTSVSMCPKFFHDDAEIYLDPDQFIPERWIEADAAKLE  
EMERFWNPFGNGARTCGGRPMAYEVVFRIIARIFVQYRLDWSSNCDAD SCKNERILEAFPPTSSTG  
MRVTAHEWDD\*

>CYP6466B1|7621|Grascr1

MPAGKIYIVNSLELIAQVQRQPKVLSFWYLEASFGAKLAAVSKSASRKLLHNVHRDEGEDSLFDDSI  
KMLSKALRPDNLDEMNOVMARTIIESLARFESHLDPEGKCNVDLWDWVKHEMTVATTDATYGP  
LNPYRDPTIESGFWHLSENVSLILGIFPSLLARKGYHGRET VQAFTKYETAGGPSQASMMTKEYQ  
ISKSHGISPLDRARFETESGMAILSN TIPAA MWAFFHVFSRPEALSLVRERALTLTTLTQRKNQNGNQ  
ITVRIIPLLLKREDPILSSIIHETLRLQAYGAPSRMV MRDTMLNGYLLKQGSVLMMPNEAIHTDASISE  
KPLEFDARLFSP PSEGKEDGEGEKEVREELPKGA FRNFGGGANWCPGRFFAINEILFMLVLVALKYE  
IGPVAGEWCMPRLDVSEYVFYCDAAATGEVPCFCKDEEGVGERDVGV\*

>CYP6846B1|7702|Grascr1

MYNSLVSEAFEFWLYDVPISYLNVFLVAGLSLLFWRLYRFTILPILHPKDPKELPYWIPFLGHAIGFFV  
NSYRVLDQGRIYFGNTREPYSLTVAGQKILIVTSPEDVQSLYKHTESFSWLTFFVQDLYRWVGLSQASI  
DKLWSPPTKEQKMNNPRRKLPPNQMIIEEYEHQLLPGKNHDDIASKFAVELDKLVSWRTLRSRSC  
YKLESTPDFVKISLIDWTSEVFILITITQLYWGKCIFETDPNLLQTFRQWEETNWKYVFQLPRVLSKDTY  
AARDGIVNAFTKYFQSTKESRADISYFVEISESELRDIALEDSDIARVHMLQMWAVNGNVHKVTFWI  
FAYLLHYPELLSVVSEEVKAGMLNGKPNVTASPTFPTCWITVLASRRFTSNVVKETVVGGKIFRKRN  
NVMVPIRQLHLNTEFWGPDAAEFKAERFLHDKNLAKSSNYRPFGGGQHLCPRFLAKKVVSFIA  
LALSFEISLDTKDELGKPRFPRADERKPALGTLAPVAGDEVILKIRPKRTL\*

>CYP561Q1|7800|Grascr1

MALPPLCSTVEWGLFAIFIYRIAIHHRLFLSPLCKIPGPKLYALSNIPLVYRKNIQGVWARKVYFLHER  
YGPVVRIGPDHVSVDGGIGWKDVYFAKPEFPKHLDDLDEYYKLSIISAPTTEHRRRLRRLYAPAFDTK  
AIRAQEPILQKFVSLLLQRLGEQEGKGVDTINTWFNYTSFDMGELTFGEFPHCLDRSELHGWIALIFE  
NLKAVVSLRAFRSYALPRELLPFLMTKEQLAKKEGHERYTQEKVLQRISEGRDARQDLMMHFMKH  
MEKGELTEDEVVRNAGVFIVAGSETTAVTLSTLVYHICKDNEIYNGLTREIRGTFKEDDITISSTMN  
LEYFNMCLNEALRIHAPAPDLASRTSPGAFVGGHWLPDGTETLPTYSTFRSPLHFHNPTVFVPTFR  
APSPSSPYFDQAYEHDNLSVFEPFGAGARDCLGKHLAWAQMRLIAARLLWRYDVQVDWEASEG  
WLERQRGLGGE\*

>CYP61A1|8069|Grascr1

MASVAGGSFASPSADAQTAFFTSNELLVSRFITGLSAWNVALTILLGLIAYDQFSYIWQKSIVGPSM  
KMPFIGPFLESVFPDFRKYKAKWDSCALSCVSVFHKFVVIASRD MARKVFNSPNFVKPCVVDVAH  
KLLRPNNWVFLDGAHVYRKGGLNGLFTRQALEMYLPMQEEVYDDYFERFIKISQEQNNGKPV  
WMPVFRELMCALALRTFVGYYMSES AVKKIADDDYINVTAALELVNFPIIPFTKTWYGKKASDMIL  
EEFSKCAAMSKMHESSEYRKKIAKGIEVDPAEKPAQILREFSDFEIAMTLFTFLFASQDATSAATTWL  
FQIMADNPQMLDRIRAEQLAVRDGDRNVRFSLDRIEKMTYTRAVVKETLRYRPPVILVPYLAKKDF  
PITDTYTAPKGSMPVPSVYPATHDPEAYPNPDTFDPERWISGDAEKQVKNWL VFGTGPHYCLGQTY  
AQNNLIAMIGKASLMLDWEHMKTARSEDIKVFATIFPMDDCYLTFKGREE\*

>CYP570V1|8207|Grascr1

PLSRIGPSTLLTSSAPELRRIGGARSSWKRSYWWYRSMRLDPTKECVLSLRDDRAHHALRGKLLPGY  
TGRDLYGLEGIIDREVEKLVALVEGKYAGERMGSGGGIESLRAKEGDEGRKGD SKAKISGDEEEGFE  
KIEGRNGRSGGLKKMDLGRVVQYFTLDVISSIAFVSGIWIRMHGHLDKDADIFSYIAATDNIAATDKA  
LPVMLLSGLLPVLMFLQSPIMRPLMPKPEDGFLGKVGIGIAREAVATRFPGPDGKKMEEKEMEKD  
MLGSFLAHGLSRDEAEAEAVVQVIAGSDTTATAIRATMLHVVTNPMVYRRLQREIDGAVEEGGVS  
RPVVADGEARKLPYLQAVVREGLRIFPPVTGMMPKEDDTVCGRYVPAGTNVCWTAVGIMRNKEV  
FGEDADVFCPERWLGV SPEKQREMEQWTFHCF SKGLRWECLGKDIAFIELNKVFFEVEVGQESEAMIR  
LLKNGGLIKFW

>CYP5076L1|8251|Grascr1

MLVQYFDHTVLHAMGLVTILASSFFSGLYASLLIYRIYLHPLNKFPGPIGARASTLYLSTKLGLDLY  
KKLVKLHGEHGDFVRVGSSDLSITHPKAPALIYGSASKCTKTCWYDLEHPKQSLQQRDRASHDQR  
RRVWSPA FSDKALRGYEQRIQPYVDKLALQIGA HNGQKVNVS KWFNYSFDVMGELAYGSSFGML  
EKDEEHWA I KVLGEGLKPIGLMLPMWVFR LIQAIPGVCYQCGFSGSFKLSLAQWGTGGGINAFVK  
NNAQSDKRSSLMNPIVPDIMSTLLEPLKGKELTYDDRM TLEGDTNLVIVAGRSKPQKLAKT LSDTTS  
TSLTFTFLELARHPEHVDKLRKELEAVISDP SGDIPHQNIINLDHLNGIYESLRLYPPVPSAVQRLTPP  
EGLDIGGT FVPGNMTVYCPYVMARTTT FIPERWYKEPELIQEKNCWFPFGMGPGYGCIGKPLALME  
MRKAIKIVLNFDVEFAPDVSDRGKSFEEGMQDYFVVG LAELNLCFRRRGV\*

>CYP531Q1|8268|Grascr1

MLPLIVLQAVVAYTLYSLWRHFN SPLRKFP GPFPVAKFTNLWRVVKVAKGQSLDAQKVLHQHGT  
AVQLGPNMISLDDPSLIKTVYSVKGT FVKS DRY SIVDQKVGNQMVASIFSTRNNEFHASQVKPIQKH  
YALKTIMDMEPLIDRATETLVRALDTKFVDNKLPCELNKWLLYYAWDVVGLVTFGEPIGFLERGAD  
IQDIQKTTDLSVDYFGAQRQEAVDKEKTGPKDQLDLFLKETVGD SKANDFQILNWL MGNIQAGSD

TTAATLRAILYYVLKNPQVDRKLYGELEAAKLETPVQYRETRSLPYLGAVVQEACRMCPGVGLPLE  
RVVPPEGLQLPDGRLIPGGTVVGMNPWIIHGNKEVYGQDADIFRPERWLRNEDEAEETEGEFDARRL  
KMKEADLTFGAGNRVCLGKNISLVEIFKIVPTLLRLYKFRFVDPNKEWQVHNTWVFVRQSGMEVLIE  
KRL\*

>CYP59U5|8342|Grasr1

MVNISPISIALQALQTGMISLERPSLLPRFFKPIAGGRNLFDLGGTEWRPWRAVFIKGFNTEHIFSLVP  
GMVKETQSYCKILNRRAAEGEISSLDATTLRFTMDLIGKTILNTSLNAQQGYNTLADCMLNQIRWH  
QANAQTNPFSYLNVMRWYVHWSNGRKMDRYIGSLDIRYSKIQAEMAQGHSTTKSVIDLILRAY  
ATTSSSQNSPHLDHEFRFTAIRQIRLFIFVGHDSSTICYILHLLSNNPTSLRSLRTELASTFSGNSPDEI  
GAQILAEQHLLNQLPYTAVIKESLRLFPASASREGQPNVSITNDAGQSCPTDGAFLVTLHIAMQR  
SPKYWPRPDEFLPERFLVQQRPPELYPPRNAWRPFEGKPRNFMAEGLVMVDLKVVLAFVVSQFDFRE  
AYEEFDRVSVKVKGRTHRGERAYQVEEGAHPVDGYPCRVFVRDDA\*

>CYP5093K1|8366|Grasr1

MESDGSDSELDWEKEIDRFTASVVFAIAYGRRIDSLNAGVIRERLKFMHFAASLNVPKGKYLVEFPV  
LKYVPRWMAGWKREMQDMGRMEARSNMGLVEGVRRDLEKKKESEKGEVEKEEEGEEGEGKGKE  
DGDGERSSVFGVSNCMTARLLSLRSSDPAGLGLSDRDFAYIPGSLFGAGSDTTASTLCGILALLTHP  
HILALAHAEFDAVVGSSRMPTFEDEGDLPIRSLVKEVLRWRPVAVLGGTPHSSTENDVYQGWFI  
KGTTVLGNSWAINLNEEYARAEFEFGRWMGGELKGREVPGYLLGDGKEGEGDVVVGKTETKE  
EGDGEGSTATYRLSREYLQSFPKKQHPSPSGHSSFGWGRRICPGQGLAENSLFIALARICWGFILP  
AEGLRREDYDTGMDAYTDGFNIRPKRFRVIRLIRDEGRRKVLVEEEKAAWKVLGGMEVFGE\*

>CYP5586C1|8467|Grasr1

MVNALVGSLLALAAALVIYKLKSKWRQNHRTALRIGLPVFYSPYLSDIWWLILQPMLVPILERLPQA  
WTSPWLSLAQPFKVWSAGHRPFQEAGADTFVLATPNGNIWTCDNDIIHQLFTLHPKVDQPVELL  
KFFDLWGPTIGSDGDTWKAYRRAVTAGLGTVNKIVWDETQYQTDALLSHWIETEGSVIHSTRQ  
WTVRLALHVLSSGFFNHRLEWDRRTTKSAPSGHMMMAFDEALPALLEHLGLLYVTPQAVLGKLPKG  
MFKEAHMSFTEVTSYFHEFYAQAASNIQEIAAKRYKSILEAIAISAADEELTGKVPLPKESVVGNIFFT  
LLAGHETAGSTMGFILVMLAIYPEVQKWIQKQLDEQLNGRPKTEWSADEDYIRLQKGYIGAVQKEI  
LYIYHPASLILRKVVEAITVVDDAGKSYRIPEGTALLNLAGAARNPNVWKRPEVAQERIAALSDSP  
ALYFNPERWLETDDRDPDDFKGEVLQWQAFGAGGRTCPGRAFAQIEMTSMMATIFKDYSLELVVTD  
EVLORDAKGNAALAWERTRDRAIKIMYDDIEMNISIGLKKEIPRIVKRIG\*

>CYP609Q1|8469|Grasr1

MPLNMLVCDHPTGLSIALVSLAVFGSIFLYLFRPPRFHPKAPKLTSEAWPIIGSMQFFTERWSFFERQ  
VAHSHSGNFSFYAGDKPVGISGDQARKLFFESKTMSLSDGYAALLGGTPRVNRKNNPMNSESVDR  
EEGFTHYFNSRIAAVVKGPVLAKALPQLIADIRGGLDKLTAKPDRTNPFDSVYRIVYQLTLRIAACD  
ELASDQALLDKTLRLFETIGETATPLSIMYNWMPVPAKFRRLWAGVQLYRVIKSVVDARRKEGRSE  
DDALQFLIDHGDDIFKITTVVVGALFAGQVNSGVNASWILLYLANNKLWTQVRDELDTVANRH  
CPDKSPPIRERLAYVPYEAWESEFPVIDLCLKDCIRLQVSAACFRKNISGRDIPIDKAGTEIIPPNAVYA  
YHAREIHQDPTVYQNPLEWDPARYLPDRAEDKKKEYAWLGWGVARHPCIGIKFAKLEITIIVAFFL  
AYFEELQIVDEKQQPRGLPVVDMNSHQVRKPDEEVFLRYWPRED\*

>CYP605B4|8603|Grasr1

MAAEMPRWAAALALLAVAVLVTHFFTSKERVAI PRDLPTTELQYRVICPPYTRMCLISKASFEKGDK  
RPLYAKNSRHSYVVFPPKFFDELKRLPEAKASAKAFFHRANYGSWTFIQETHLLKTIIADLTRSLP  
ARVFNRRQQDCRTAFDAIVGYAPDWKEMGLLITTFEIVAHVNACAFVGRDLGNNKKWIRAVMQSP  
LVIHVAVVLMNSCPALLRPWLAPLAFAPTLKNQWDMKRLLTMPLEEDKRTFSNSTDKAQLLRPKQ  
EGKIPLTAMLLSRYKPEEASIKQLITDYILVSFDSTPSTASAMFYMICELAAHPEAVEVLRKELEEVMV  
DGKLPQTHLQELKRMDSFLRESFRLHPVSLFSLQRVTKGPVQLSAGPTIPPGLIMGVDAAINRSP  
WEKPDEFDMNRFYNLRQKPGNENRYHLLMTGPDSPGWGDGNQACPRFFATNTLKLAIHAHLIM  
NYDIKLKEGHYPPKVTPLANGTWAPDVGVTAYFRTRT\*

>CYP5589C1|8610|Grasr1

MYLTSMRQALLNSLNFSSQRPFTVIRVAIIIFTVAFLHAHGEEVYRRFQRVKRSSTPLALWYSKPVNEI  
VADGYDQILKTTGRPFVMRWWAKDWIILPPKYLPLRDAKPNHLNFFETISNAFYLYKSVGDLYSS



DRMATVVKKGLSPKLPLTPYMLKDVEYAFRTEIGDLEESTSFTAQQLFSSRIAHKAVARAMIGNELA  
HDQNFMRICLDFIMSIFTTALVICDLPLGPFRDLFAVPLSFWHQIKLNRAEKILLPVVKSRILEWDNL  
QGKTGHLDCIQWTLDLSEDNDKEKDPSTRITHELLHNLWAATSAPGGLVLDLIFQLLLEPEYLEPLRE  
EVATTTNKYGWSEQTFSSKLQDSFIREINRLYPTGSIIGSPFRFSDGLTLPVGTRFAFPVGAILHDEAN  
FSKPLQFSGFRFAQMRIEEASEGEGASRWSASALSTTNLAFGYGTHACPGRFFAIRIVKMIFSKLILEY  
DIEWAGHVDDKKPLPMWIEGQSIPNLTQKITLRKRLYS\*

>CYP51163A1|8622|Grasr1

MSTLHNENTLFEIPTSFSLQGYRIDSNNVICVLLTVGLGWYFLRSNYKSNGVRLPTYILLEGYAIAQQL  
QSSSWVHNLVELIRHGSSHLGTSSKHRVVSSPSLVSVLRRPHHMLNNDPAQWALQACVFGSREG  
MRVHLESISEALFAAVSSNLLQETKARGIIHRTNDLLRSLVPNLVASPNPWLSNVDLKSRLRQGHAEA  
NLYELIRDFTTFVSVRMMAGADFQDLNPDFGSDLFILDKAFMLLALGLPSWTPLPIMREAVAARGR  
MLKQLASFSDRLEAVATGKADSNLQSRSDVNDIFWQRSKVYTSGLTMDDRASLELALFWAMNG  
NTSPFVFWAVAFIYADQELLKKVREELDPLIKVSGRIDDLDVEEINPLTKVSEMKEGRKIDDLDMEGI  
ARRCPVFKAAYMETFRCAHEPTSLRYVQQDFNIVDPTLGKDAKPVAFRKGTFTVTFHTVQQFDRGI  
YPEPEEFRVERFLKESEGVKVDYGNLKPWGEGSGICKGRLEFAEREVLVAVALIVRCWDMQAVDGA  
WKMPKKIPGTGVMKPSSSLRVRISPRT\*

>CYP603C2|8636|Grasr1

MARIGRAMETEIQAVGNPIQTWPELVVQWKLRSRRSGIRYEAGSTMWTVPNSTIIAWGTLAALV  
VLRALSPHPPVTKRALRHIPELRFDDGDESAERYRKDSRSLLYKGYEKFYTNTERFKYL RHGVAFQM  
RNPIAELGPQLFLPMKYLDEVKNARVSLFSFPAFSEKVRHPSCSGSLRRIDETVDVSSELQQCTAAD  
RRLSTRILAEAMHGEVIAALDETLSDKQGPITVNAYRFITGIVARVTALALVGPELCRNQEWLELSI  
GTTHAIMGASNVIRHAYSPRWRLARWRDEAPRQMIAMRKRAIKLLSPLYKDRAEADKSGGDL  
TTPDCLAYLLMRDADTSLDGIANQQFLTIASMHHTSATATSILFDLLAHPEYEPDILADIEMGLA  
EKGDGPWTLQNVAAAMRKLDSEFMKESQRIHPLGFITAQRLSLKPHTFKDGLHLPRNTIFQFPADAV  
HHDPSPVYSPYNFDPWRFYKLRETVDPNRFHFATASDTSLNFGAGSHACPGRFFSGLVIKFLVLGGL  
RDWDVRFEEGSGRERPRDVCHDLQMPVNAEARVMIERKKGV\*

>CYP6251B1|8729|Grasr1

MDIYLACLGILAHLLYFRHGEHHLQAPYVFWTALALPFLVSAILFQFGISTFVSALKHVCLLEATFS  
ASLMLSTGIYRVFLHPTKHFPGPFLASLTKWYHYFLGGRSFQQHLFLDRLHHRYGDFVRTGPNITIF  
TPEGIVPIHGAESLCRTAWYDNPLPIFSVATIRTKVSHEPRRRVWDQGFMSKALRDHETVILKHA  
MKDVIAAQDENHVRDFQEWLQYYGFDVMGEVQFNYSFNMLEHDKNRWVVDLIKDGNAILGSM  
TSLPWAIRVALTVPYLTDLKLFIRWCIDRLSQRMQSDPSNADTIGWLLQHASENEGKADWFGLV  
GDMMGMVLGGTEPVVNGMVFTLYHLAESPRTAKLRSEIKTLTSYSDNTQLAALPYLNALINETYR  
LHPGVPSGGLRTTPPAGLMIGGTFFPGGTTVLTPQYSIQKREDCFERAEFIPERWTSRPEMVRDKRA  
FMPWGLGPFTCVGKNLGLMEIRTITVVLVDNFEISLADSEAKNRLNGLTDYFAAVPGPLHLRMKK  
REPEAQIAQPKSYEK\*

>CYP5104H1|8775|Grasr1

MRIEGNARDRIEATGQVDGAVSGFGAPFSDIPAPSEAAASVTRLWYTYIHWQGKQHEVLPRLHKKY  
GDIVRVAPNEVHLCTSEALRAVYGPSPCVKSDWFRVFGQQRQFDLVSENRQKHAEERRLVSQIY  
SGTNIRYLEPYIDITLSQLLKRFEKLNRPFDISDWIQYWSFDTIGMLTFSQPFGFLSAGSDWNSALHQ  
IRSAGDSAAWVGQNPWFYLLCERLLFPLLWGYNPFALANRNGVIREFATTQSQLRQKRAAASSSSQ  
QKKQQQQDIMSSLLTVHEQNQSFSSAVNSMVATNIFGGAETTSSTRAVLYYVLRNPHVAHKLQ  
KETDIICVAHAWPPGQPVSLNLAEKMPYLHAVVYEAMRLFPANGLPLARVTPPEGLYVNDRYFPP  
NVQITVYSWSLHRSEKVFEGGDAGEFRPERWLDDDEEGDSDDDEGGGDDGDKEGGGGEENCMGIRG  
RGEGRRTALKMTSRRGRSEKPTTVAAATVAKMTTETATNIPANPMMNLNQNQTQTQPQPQNP  
QKLESHISTATSSPSAWARGFVSDGI\*

>CYP5105F1|8788|Grasr1

MTRVFFLTYTELDLAFLIPLIIHSICLAFYRLYVSPLASIPGPRLAALTYWYECFYDVFLPGKYAFKLKE  
LHGQYGPIIRLNPRGISISVPTFIDTIYAPGAGSRNKDIEKTKSNKDIEKTKTLGTDTSLGGAASHDL  
HRLRQGALAPFSSQKAVCNLTDLLEQRFKEVDSTLMWYASSAADGEREDEERRVVNLSDMYFAVA  
IELVFQFLASPLIHCFAHIKISIVKQYCFGYEDGSLANLDKAKQSRENLAQMLRGVKFTTHFGWV

QRIMNYLPISLRKRFEPKGVQDMRDLRKSIHNDVAEVLKTNDDTVVKATKAHSILYGLRDSEALPPH  
KKTAQRLEDEATLLVMAGTESTAKSLTIAHLYLLSQPDILRKLSELLSYNYTRLPLSKLQDLPYLSSI  
MTEAHRLSFGLTGRNPRCAPDETLYPPLPPQQTESLSSHENHDTTKSYVLPPLTPISAPTLIIHTDPAI  
FPNPWRFQPERWLGEEGRKRRKYMLSFIQGPRKCAGMNLANAEMVAMLRATAAEWEMELAEGTN  
EDDVKLNSQGVKARVLRWRGGR\*

>CYP55D1|9052|Grascr1

MAAGQQPELPTFPFARKQGYEPPPENAE LRQKCPIAKAKLFDGKETWLVMMKHKDICEALSSEKLSA  
DRNYLGYPEIHAGGAKAKEARPTFVNLDNPAHDRQRAMLADAFKPEAIHGLRALMQATVDRCL  
DDFIKRGAGGKTVDLMEYFASPVPTQIILEILGVPEKDIEAVSNDSEVRHSTSRNAAETSNNRLNDY  
VAKLVSERIEHPQDNLISKLVKEQYSKGKLDQTDVTTLAFLITAGNAALLNSIGLHPQQLDLDFKKN  
PSLAPQVVNEVRLRYHTVSSLNSRRRAVKEDLVIGDQEIKKGESIIICAMQSGDRDEEISPDPDNFDIYRK  
RDPSSLLGFGYGLHRCLAETFSRQEIEIALTSLFKRVPNLKLAVPESELKWSPLEQNVGILELPVTLAQ  
SKSGSAAQSNLDGAGNGNSDFYIGIRIGIYLQWISSLLANIFWPD AIDANLDTNTIFLLALFVATVV  
ATATGTSSISTPEIVVLLQLCFGLFSVLTIWGIRTGASAGDPVRFLIGSTIRLALATLISVYGVWFWF  
YGLQQYEPEPDPCGTVLFIFSPVSVSGGLGLFYKIQSVVVLATYAILFVKEYLLIICFLCYTAIWTSVVA  
LISLIFSPHFEEHSWEVLRPEFDRLAKKRKRNGDSWKKVFLRGIRTEIKTLWLVLVHWLQLSACIFWS  
QANGEKSAGDRRPQLRPWIAPFVNPWFVVEKIAKALDSRVNPASSRDRILFERMSDFADTIIHFVNV  
VAVIWTIVAVEFTLAWNITDIYTIDSTGQLIPFIIGIVSFLRV AHGLSIQGSIKELSNYYMKMFNDTSP  
EDLEMVKTTFDRRLDLSSVDIFLLPNRKRVIKQRPPIRRRSVQDFREMRMHYNFEADGTVSDRGS  
SRRTSFTGDSALESGESGVKVRLYKDFRRVGPSREESVDEDFHDETSFQHEGTVLDRHSEARS  
DLGQLPLTPRIAGELKSAQLDEEARGADDYESANRSMTESESRSDDL TRSRHSWFGRLSRSDSLFALAT  
TIFFTFVAFLPFMLLRICRKHFPAVEERAQEATLQLTEMLFAHYTPAWYREIDFESQIEHLKLT  
PEEARKLRMKKALQTWAKRQDKKLEHARAVRDPPFQFVNAAPMILTGA VKLLL TGAVKLLLLGL  
LYLIKGRLTRNKESETHGDDDNVDDPPHQTEGEIKHSEPPPPPPSPKTHG DVAGNTHPSKSPPSAEE  
RNSNGSPDVIRKNNPQTDGNNVPPSPQIFIERPLSIRSNSIESHISSPSSLTDPISAAVHRDLLTLLD  
SLFDYLHSTNFLSILRKRSLPLCTLHIATYVLLL CEDRKLHEAERWMTGIRDSVLHLKEVRVKKKGG  
MMSRSKQHEETMQVWKKIMGYENWKECFELTVERMEDGMRERVERGLGAGSEGGLRRSLRRRR  
SSSSSNSSEKRRRRRSNDDSSGKKEKWERDEEAEERRQQQRQHASLRLRRFSWPP\*

>CYP503N2|9076|Grascr1

MIEDGVHDLSSILILVGLTAAIVYASQVLLSPERVHAPLIGSRSFEPWLLGLRFTKQGRFLREGY  
SKYKDSIFKVQCNTIEIVLLPRKHVDELRSLSSEQKVSSPQALYNKSNPGPYTGLGIIESHIFDAVQRH  
LTSNLAGFLPPIKDEL DYARRKELPPCDHEWVPLAVHATIA RLITRLSSRTFAGEELARNDEW IQIST  
TYPMNSFATTLALRMVPAIHPLVAMAIPHYWRVQNNISSAKRIVGQIIDERRETGVKRRRSKDEPI  
DLLQWMMDEAAGPHAQTEKLAHRLLFVSKASVMTTSLISHCLFDLCAHPQYLEPIREEISAALRE  
DGGLQHTTLGKMRKLD SALKESQRLNPAFLMTFDRIVKEPLALSDGTRLPVGTHLAMPTDPMLRD  
ADFLPSGADADSFPDRFRSAREDSSKPTNAQRFQLASTEATSLPFGHGKHACPRFFASSEAKLILT  
HLLLLYDFKYPHGKSRPDNWLFSENMAPDPSARLLIRKSKTVERDLEKLLLR\*

>CYP65FT1|9093|Grascr1

MSAFQSNTSLSSGITSTYIAAGLLLLGFLAKVIHNVYLHPLAKYPGPKLWAAFHIPHYWSMWTGN  
ISFNIKDAHDKYKGKIVRIRPDALSFNTSQAWKDIYGIQTGKQQLQKDPDFYLQQSAGSSIFICNDS  
DHTRMRRNLAHAFSNTALKEQEDLMTGYFKLFMKKLWEEVNGPQNGKVDLVK WYNCTTFD VIGDL  
AFGQPFGALEAGEYHFWIRNIFKALKRSQFDRITNAYPVIQWYTNIRDRLVPQANEARIQHAQYSA  
DAATKRMALETDRKDFMSYILRHKDEKGMTLPEIKQTSKVLVLAGSETTATLLSGCTYFLLKNPEKL  
KKVSDEVRAAFASDEEINMTTAMQLPYLQAVLEESFRLYPPVSTLPRRTGPQGNSICGQNMPPN  
VSVGYNQWAANHCESNFRDAESFVPERWLN DERYKTDDLGVVQPF SIGPRGCIGKNLAYAEMRSI  
LARVLLNFDLSLCNESKDWTNQKTFMWDKPQLFVKLSGRTGRDLAMANA\*

>CYP50330B1|9184|Grascr1

MWITLAPTVAVMVKLLTKRAVLGAWQWDDILISFALSQYVAHILYLMAYTSKLVGLTFFLTLAG  
PHSRKTLLKALYAFTAFWA IATIFVISFQCRIPYPWLQDSDHCINKLAFWTVNTIVDILTQIGVGLFPA  
LLLRHLQAAKRRKLTSMLSFTPNLLCIPVSIVRLVYIYGTPVTS DYTWNVFALELVTSLHAILSVLTA  
AIPFVKQFIDSLVSLPEVIADGTQVYTSNSPNRTSNPNRTFKNSLKGSSILSYGKGLFGHSRSQPTPTGT

VGNFTEISSVPEDHEMQRYETREGSQEQMDLKFakkMDTMLAFLKRESVISKPNKQSGNIPAFQLQSP  
DGKLQQALQALTETTLATRAKAGSSSLRHLWHLNPNFVSTSPKLQHAYRHALIKHFNTSNALTW  
TATTSAAVAVVHSYQYPSRNPPTASEPQIRIRYLIRDLSDATLA AVLQDLFGIRGVPRATLDYIGTEI  
HRLTIKKVVDKASSASAAAATAASDLTSMQLSSDILIAHLRTLFTTGASTSSPLSSHLLHSVSGPI  
TPDCQSSSSSVSSEDFNPLNLIIPAFEAPWRAVFYTLAALQPGPRYP SHVHALRNCAAEMLGAPLA  
PMPAAAHAHVLESRLYPPVRRVRREERVDVEALQORDERYWGPRARVFEPERFLVDKEEGEQREI  
DHSRAAPEAAWMPFAVGSMKCPTASGYSVRLVA AVAGEVLRVCFPDNEEGANGLWWEMQGE  
WDEAAKMGEPLRAGREEYESVELVVENAT\*

>CYP51179B1|9440|Grascr1

MAVPLSNLTHVIKTDISRHTADSIALMHEEIEVATAVAIGVPDIWTPIPLFATITSIVAQTTARVFGVGL  
PLCRNPEWLGLLINHTQAIIVAAAAARRYPLFLRPLVVPFTKEVKAVHAARRRMEALIAPMLKERL  
EKWRADPDQEMP SDFISWTIKESEGKAWDPFIQSEFQMGI AFAAISTTTQLLTNVIFDLCTDPTYIPIL  
RAELSN SKPLSSSHSPQTRASLAGLHKLDSFMKESQRLNPNM LLSLSRHIGQDLVLSDGKILPRGTSV  
AVPLYAMNRDAAIFENADIFDPERFEKLREKKAMAGAGKFDEPDIGGEDKKLDEDGSDKGSPSLIY  
THAKENMNFYGRHACPRFFAVNEVSWLRLSP\*

>CYP548A30|9633|Grascr1

MFDAIGIENWSNTAYFLLLFIAGSASLSVASVVL YRLTLHPLAKYPGPLLGRVTDWYSVIQAWNGER  
HLD FYALHQYKGKVVRYGPDKISINSNVALSDIYGYKSNVRKAQFYSAFPATKGSWSTHSAIDKNL  
HARKRRVLSQGFSDAAMKGLQPHILSVIRTF TDAVGDFSVRNAFGNEKKERDWSTPKDMGLWAN  
YMSYDVLGDICYGESFDTLEKPDNRFAINLV ARSSQFH YLNAQMPGLKKLGLDRIFFRDLRANRLRF  
MGYSRARLQKRMQLGTD TDRRDFFFFLLKAKDPETGQG FSTQELWGESNVLLIAGSDTTSTAFSSSF  
YYLLNNPAYLSELTTLIRSKFSSVEEIVSGPVLSDLRFLRACIDEAMRLCPPVPSLLPREVL DGGIDVDG  
MHFPAGTVVGVPYIALQHNPTYHPDPFKYNPYRWMERGSGSGSGEKGDGKGASAKELQLAQSAF  
CPFSVGPRGCIGKGVAYLELTVALARTLWLYDLRLVGEVGKGREGEYSVGEGERGGVFC\*

>CYP6148B1|9754|Grascr1

MLPSHYIEELTLLPDVALSATHALVDYFLGSYTTIDLP LFGRLWSAVKNLSSQIPSLLRGMDCRCAS  
RMEREFYPYKDGVD TSETVDDNSLTGSEWSEIHPFAHMLAVVASLNAQIFVGEELAQDSRWLEISAD  
FSRCIFLAAGYLKLC PDLRPLAAWVIPHYRIQAYRRDAKQLLLPEITRQREAAAGKGYANLARTRN  
MIEILEHV SPEKERSLEQLFDRQLGLLFAATHGASNHIVNMIDLATRWDEYGEQLRHEVEQALEN  
TEGSMTKAMLEKLPKLD SFMKESQRLNPASASLVPLQLSTGQIIPSTHIAIAAAPMAQSSEYCKSPD  
VFDGFRFYRMRQNEESVSSNAHLFTT PSLGCM MFYGYGLACPGRFYADAQSKIVLANVLLKYDLK  
LPHNANRPQNVVFADASFPDPAATILIRARDDRR\*

>CYP504A46|9917|Grascr1

MTIEILGRDYPVTGFLLLAIYALLKYLNHADQPKIKGLPEVPGVPILGNLLQLGNEHAKRAAE LAK  
TYGPVFQVRLGNKRIVYVNNWKS VRELWIGNQSSLISRPTLHTFHKIVSSSQGFTIGTSPWDD SCKRR  
RKA AATALNRPAVQSYMPIIDHECTASIRQLIRDSKNGQLDIDPIRYFQEFALNTSLTLNYGQRVDD  
AELLREITDVSNRIGKSEKLTILRDYVPILRLGFKKNREAE EFRNRDKYMTLLLET LKDRIAKGEDN  
PCISGNVLKDPEAKLNEAEIKSIGLTMVSAGLDTVPGNLIMGLAFLSSPEGQH VQNKAFQEIVTAYP  
NGDAWQKVVEEERVEYVTA FVKEVLRFFTVPISLPRVSISDVKYEGTTIPAGTTFYMNAYAADYDA  
SHFESPHTFSPERYLSPSVHASSGTPHYGYGAGSRMCAGSHLANRELFVAFSRIIMSMHLSEATNP SD  
RPILDALECN AHTSLTTDPLPFLRLRIRNGAEKWLPE\*

>CYP5043G1|10213|Grascr1

MEPLVDECSDFATRMQESLGQTVDLGTWVQWYAFDVIGQITFMKQFGFMQNRKDDIGILDNLES  
GSKFQTVILEMAMA EYDKTNDGIPRSDFLGFLRAAQEKDPNRYTDRQIISNL SVNIFAGSDTTGASL  
RAIFYYL MKNPLRYQRLMAEIDAAD EARKLSTFVTFEESNNLPYLRNQRI PPPLPRSPAVGIPLERLV  
PPEGATISDHFLPGNSVIGINAWV VHRSSLVYGPDPDAFRPERWLVCES EHVDSANTGIDVKREGST  
KSQLQEMEKAFFSFGAGNRVCLGKNISMLEMCKFVPQMLRRFEMEWWGPN GDGTGEWDVKGQL  
LVKQHGVFVRMREREKMGNGKGEVGAGA\*

>CYP544D1|10699|Grascr1

MDCGFCSHDISYSIGLLKCSQETFELAIPTLPPAILVNDPENLEYVLKNHEL FVKGEFFRSNSWDLFA  
NGILNSDGELWRTQRKAGLRFFSTNNLKYFIDDLVPLVEKLNARLKAAA EVDATIDLQEELDLTT  
RLIGKIAYDMDISPDLPFSKAFDHASGVTANRFTNPLWRIDDLQGFKFRACLREIKSFGLEVNTA  
VKRRTSTKTTLDAPPPLHTILDSLLDHISDPEVVADA AVNFLSAGRDTTAQSLTWTFYSLLRHPE  
WKQKLSSIKSSFPAANRASSIPLSYDLISGQH ALPYAQAIFAEALRLNPVVPFELKECVEATTMPDG  
TELPAGAVVIWIPYGLARSEKIWGVDAAYFNPERWLKEQADGSIQAVTRSAFENPVFNAGPRMCIG  
KRMAEVLATSVLTQLVWQWDFEEDRGVGEIGGRRVMAESLTAPMQGGLPVKCHVIESQILVTPQS  
VKDATLAPDRSRSLWFMDKGNIGCLQPSELDSDDDFYSSSHSTQASPPTRHPSGRAGSMRHSRPRPP  
PTPNTGIPPSMPQNIPNPLPSAPASPTPAPSPTPLSRSSVWKRASVEVEEDIALKEFRLAFSRLDIAA  
KKVWLESIVESCDNHLLSHLHHLVGPKLKKDPFQTLPNELCFEILTYFDDPKTFVRASRVSRRWREV  
LSDDQAWMVLCEKHAYRRKSNESSTSPNANNNLGFLQQLPNASTSTESSAQSSDAKDSNLLRA  
AEHVRNLKRPRPRSTHRSHFKHRYLVESA WRKGGQMTAKHITPDQGVVTSLHLTRKYIIVGLDNA  
KIHVFNVKGDHQRTLQGHVMGVWAMVPWGD TLVSGGCDRDVRVWNMATGTAIHALRGHTST  
VRCLKMADANTAISGSRDTTLRIWDIKNGTIKSTLMGHQASVRCLEIHGDLVVSGSYDTTAKIWSIS  
TGQCLKTLTGHFHSQIYAI AFDGVRVATGSLDTSVRIWDPVTGQCTAILQGHTSLVGQLQMRGSTLVT  
CGSDGSVRVWSLESYTPIHRLAAHDNSVTS LQFDDTRIVSGSDGRVKIWDLHAGLLIRELSQPAEA  
VWRVA FEEERSVVLASRQGRTVMEVWDFSPPEELEGSSSA AAWARPLSGLTRSENSSAGGLVEDAV  
MEDMLTAHDHTVAEIFRDQEKTAERDNRLLSQKNRLGIESSASVPGSFPSDSTETERADSEMPDV  
E\*

>CYP567AA1|10765|Grascr1

MAAFYNGLILGIAAIACYIAFRFTTALYQYFTIWSKVPGLLAKFSSYPFCRSLLSGRNPFEILDLHEKY  
GPVVQIAPNEVSCCSPESWQTIYNTKPSQPTFIKSDFYDAFSNGHPSIVSERDPAKHREM QKYVSGAF  
SDRSLKEQEGLVVCVIDRFINQIGALPDNTGDLTKWFNLLTFDVAGELAFGKSFGGLATGSMHPWV  
AVIMASMRESSLVDPFRRFPLFGLLYVMFRPGWLRSLKGA SENADYAMRAIEERKRNDSDRKDFM  
TSMMSEDIRVKHQVSDKQLAVQADHLVFAGSETVSTALMVVVAFLGRDAKSKARLIAELDNAFSS  
PNQVDMISAARLPFLRAVCLEALRIYSPVPIGLPRIAPKGGTVIDGYFIPGGSIISSHGLATSHYSQNW  
QDPKTFNPDRWLTPSPADKLDACQPSLGVRGCLGRSMAWMEL YITLAKLYLTYDIELLDKDEDLL  
ENVEVYLFWKKPELRARITVRHFKGEAIDVVA VPNARSQSMSTLTPEHRVASKVEIDASKSRLPTR  
SAKHDSVTIPKVGSTQSLKETEP LSYDFWTKNDLRQKFITIIPGRKYAALFFLGAKGGGLAAKFNLQ  
SKVTITKSGQARIFYPPRAFDIARKHHWTDWLIY APDSKSALALAYEA EFDIPAVNIVKKLYNHVY  
MSGGHWAFSIDTRSHQISETWVKGHGVFSGQEPKSIKTLGA EKQNFRQIVQNYIKRPWERKQENIF  
ASTRQRYSGKEQMMDHVDKTQKSRTGEKALWSAPEL\*

>CYP6306C1|10946|Grascr1

MSVLVYVAVIAAGAWLLCLRRISSPSKLNLPYVKFDRDN SASRYRVEYETILRKGYAQYIEKEQPFSM  
RDPNDLERPLAVLPVKYLEEVKWIPEDRMSFWKHIDKQSILTQIGGPGITEEVALTARQGLNRALVY  
LVQSLQEACEAAYAKEWPACPEWTP LHPHPLITKVFA SMSACAIVGPKLDGLDSEWQTVSMGFVA  
AAISAPSKVKNKYPRWLYWLSRYTNDGVKTMWKHQARAVELLTPVLHNRIKATEELKARGVKKS  
KGPRKYEDGVQWLLDAHAAHGKDLTPTQLARDLFVIMTVSIHSTSGAGLSILFDMLDHPEVLSEIQ  
AEILQVRSRLPAGIWTRKALGELRI LDSFMRESTRMHALAQYTAVQRILTSTWTFKDGTEVPAATTL  
VFPSYHHS LDP AVHTNPDTFDAKRYLRKREGSDTHKYHFASVSKDMLQWGSGRHACPRFFAQET  
LKLMMVRL LTHYEFKHTEQDKEVPRFIPNNLFIIPNPALHV VFRERQVPLQ\*

>CYP6789B1|11355|Grascr1

MLDLHKKYGPFVRIAPNMVFSFDPLLLPQVYHLRADKTPFYSTGIAGEVPPLLQIKGDAEHANKLR  
VLNPSYSLKHLQLQEDEIDSHIHRTCTVLNVRF AATGKSLDFAEWVRYFVYDSLIAFIYGKPLGMVE  
EGKDLHGLIREWHAIFPLGGMVSTLPSIVHPLITS RFLKKYLMPRKGHTRGSGHIMSVSQSSQNASH  
RCFGSLVIDIQPVHEKLFRE RLTQPQLSRPGNVFDSVRQTKFLDGRQMTLDEAERECFLVTVGGQD  
TSPAFISAFFELL SNPRVYAKLVEEIDAFEIEGKLSSPVPRYDETCAMPYF MACVQEALRLEPSASLIL  
PRYAPKGGIQLGGHWPENTEIAANPYVIHRN QDVFGPDAEMFRPERWLED PARRKMMTKYSLA  
FGYGSRKCLGKNIALFVSQKLCTQLLRQFTMSRADLQYPTVLNWGLNVYFGQNICLEARTPSQG\*

>CYP5089C1|11421|Grascr1

MGAAFSAVLTLAVVATIVLYRCLGHPLARYPGPASAASSNLWQIFTFSGNSHIVVKGLHEKYGP  
VVRVGPSSLSLSDLAHHYIRGAGDAFERGPYYDFARDPSTGKGSILSIPNHSQHKKPVRRMIGPALT  
ATKVQSYEPTVLKNVQLLLLDAIAAQHSEGD TDTVDVSTLIHCFLIKTTFTIYGTPLPGGLDAQEHISI  
ALRDVSKFAFGSGYLPWLSWLINSCPVR AFTHRPKYEKDGSPIGMTAIVSKARKTLAAVLASSTPTS  
LHPSVLRSFGEAGAASEKRLSNEQISTECLNLMIAQGCGSTTASLTAVFYELSTSQQGEWQHRIRKEAL  
RAPDAPALALNAVIKETLRFHPPFACGFPLDVARNAPSQIPGLTAPLPTGTTVTCNFYVLGRSKEI  
WGEDADEWKPERWLSAGKEGEGTSGRDLED R FVVF GK GPR SCLGREIAMKVLTRTVTEILGRWRIE  
SRGELVGKNC FEMQYN SCRIAFLEGRSIDIQIE\*

>CYP51193A1|11487|Grascr1

MLPIVLR TGFPISIPVTPSNPLWLIF AATYQPLMAKYLP TAIYNRIRMTIFGWQFRERWGVNAELGT  
TYVLTSPGGNELWTADPELMNQVLSRRNDFVQLEMASRIMSFFGPNITSSNGDQWLRYRKTIAPLL  
SERIMHAVVWVETVNQIQQMLREILSHESTREPESNEVIEGIRTIAINVIGSITYGNQHPWIDSHRQAKL  
SLKSELT FIESLMWVVNHHVIAVFLPDKIMRHSMMPRWLRRLGA AVVAFSDHAHQLIQAHRMNS  
DGRPTIVGSLVRLVDISSQAVSGKDTSAWTEDEVVGNLFNLTIAGFDTTASTIAYALLALTIEPQWQ  
QWISEEIDSAAYS NKETDYPVMFISLTRCLALMRPAAIRTD DSGGYERVPCNWMRPCVTRALWSRSS  
RIPAVEVA AEY\*

>CYP6524C1|11489|Grascr1

MAALTIVIVYLT TLLIWNLYSLFQNYRLARSIGLPRFICPVGPANAA ILIIGGIFGHRLSRYLP AFITYDR  
VKLIIVGWEFYARHTMHAKLGP AFVLVISGSNTVIAEPEMGQAVLTRRKEFP RVKISSRILGVFGPN  
LVSADGEEWGRHRRIVAPVLNERIMSVVWKESCNQTRDMVEALGKRITATDNREANDDASDKIC  
DTVD SLRTVTINVINSASYGSERTWSSAMTSSKPPPGFNFSFMDTVVIAKNLMVSLLLPARLLRLPV  
MPSSVQRIGQAVYEFPLHAKSIIVREREAPWSAVGSGNTLMGSLVRAADTESSQAGGKPLRSAYLSE  
DEIVGNLFNFTIAGFDTTANTLAYAVMILALDTQWQDWIIAEIDEVKRLHPEQGYPDSRPETLRLYT  
PIPHIARIVEQPTRLNLHELPAKTMVQVSA AVIHVSPDFYGPDPLAFRPTRWIAPPSSATKAPRTLAC  
EPLVTPDTRTFLPWSAGPRYCPG TKMSQTEFVAVLATAFAEWRVELAPKADQSVAKAAKELRSVM  
ADSKLGLSTQVRRPKDVRLRWVKR\*

>CYP51F1|11779|Grascr1

MGLLEDLGGYLSETSTQSLFALFGLGSA AFLALAVVLNVLRQLLFRNPNEPPLVFHWFPFVGSTITY  
GIHPYNFFFEQCKKYGDTFTFVLLGKKT TVCLGPKGSD FVLNGKLSEVCAEDVYSPLTTPVFGTDVV  
YDCPNAKLMEQKKFVKFGLTAKALQSYVELIVKEVHDFTTNSPLFKGNEG VVNITDAMAELTYT  
ASRSLQGREVREKFDHSFADLFHDL DQGFSPI NFMLPWAPLPHNKRRDFAREKMASIYLDIIRDRRE  
SGKEKDSEDMIWNLMNCSYKDGKPIPDKEIAHMMIALLMAGQHSSSATS AWILLRLATNPQIVDE  
LLEEQRRLVLGSESAPLTHDNLQLLNLNSQVVKETLRIHV PITSIMRNVKSPMHLDTPTPTIPTSHWLL  
ASPGASSRMEKFFPEPLKWDPHRWDGEQVIKAENDEKVD FGYGIVSKGTNSPYIPFGAGRHCIGE  
QFAYIQLGAIVATWVRLIKLSTVDGKKDVPD TDYSSLSRPMNPAKLRWERKEKVEKS\*

>CYP50230C1|11860|Grascr1

MESSMALESHSFLLASTAIVVCTITYLVSA YFTNGLNRYPGPILAKFSNLWYYYDVKSNNHHHDHLIA  
LHRRHRDVVRIGPNRLSIANPDYVGRIYSTQDAYPKSEMYDSFSLRTKEGRQQITLSQRDQKIHART  
RKAVAHTFTLTAMQDYEPHMD EIIKLFLRLKEKTEETS NFLCDFGLWIRFYVTDITILYLTFGSTFGF  
LDAGKDSVEFFDNMNANMDKDSLYIPMPWWSLITKFNPITLFSSENSFVPGWCMTQIRKRQDARA  
ELEEQTGQSGIDVKSDFLDKFLDASKISTPPGIDY TALIDWCLTNLQAGSETITVELISTLYHLLKQPEK  
MAKLLKEIRSTLSNPV TYKEAQKLPYLDACLREGLRIHPAVGLGMERTVTSNLGLKLPDGSVVPCG  
VLVSMNAWVLSRDRSLFGDDADD FRPERWLQGKEETEAAYMERMNAWKRADIVFSYGVHSCSG  
KNVAMMEMYKVLPSLLLEFDIELKDPKKEWGVINRFIVRQTGFECVVRQRA\*

>CYP682BD1|11925|Grascr1

MAQALLGLSLLGLYLLCIVYRSVVRIAPDEVHVL DHEFIDIHFGTKHRKDKYKPHEGIFGMPQSVF  
TTASSDLHKVRRAAIAPSF SRRSILALEPAMKEKIGKACSRLESFKSSGKAIDLRLIFTCLATDIISEFTF  
AECFNLLDTEDFAPAWRKQFSEGARNFQWFKHFPALWPAFRSIPNRLLAALMPDMELLRKWERN  
AQKLMKESINTFEP SQKKENSPKVLYDLLASDLPKEEKHFDRLWQEASIILGAGVETTANTLTVILYY  
LATIPEYNARLKNELRAAMPDTSQELKLC DLEQLPFLSAIVSEGLRKAYGTTTMRMIRVAPEATIKFNG

HEFPPGTAISMSPIMLDDPKIFDQPDKFQPERFLERNSRADLMVFGKGPRMCLGQNLAIAELYLTV  
AAIVRRFDLELFETDYGDIIEFICDAQVGLPKANSKGVRMIVK\*

>CYP532A35|12065|Grasr1

MIEVLLRIFVGHWPVSVALVGVALYFTLNYLNHGLNKYPGPLMASLTDWWRFLDVWGRRPDKTHL  
RLHRQHGDIVRLGPNLTSFADPKAIKTIYGLNKGFRKCLFYVGLGPLVQYEAGVDVVTQKFLDQTE  
KLYATKDSICDFAQWLQFYAFDVIGQITYSKSHGFVEKNEDIDGMVGYLGRLFSYVAPIGQIPFLDN  
FFLKNPIVRLLDRCGVRTFAFPVVTFFARARMNERILKKSRTTATFTSNDNRNAPRDDLLSQFFKAKEN  
NPAFFHEGRVLVMAVSMAGSETTAISLA AVFYLLRNPHSLNLLRKEIKEAIASGKLESREDGLTS  
WAESQTLPLYDACIKEAFRLHPAAGLPLERLTPPGGIEICGEKIPGGTIVGCNAWVIHKRPEVFGEDI  
DSYRPERWLDVVSADKRKEMDGTLFQFGAGSRTCIGKNISLLEIYKLVPSFLRRFDVRSPAVFWTFH\*

>CYP6102B1|12145|Grasr1

MSFDLTMLDDAILRNPIHESVIRNQLTRTLGITLDSVREELSQSLDTFWGTSADWHDVPLLESLLKVI  
GRSSNRIFVGLPLCRNEEFVEGILGFAYAVVISGILLRMIPLCIRRFVAVPLLFANRKNFNKVAKHLV  
PLIQQRQANISKIDNDEKGASEEPADLLQWNIQNSMRNPDPREWDPDTLIAKRTMATNFAMHTTS  
ITTAHILLDLASSSPETKVLEDLREEVRQVYAESGDKWTKASVAKLFRLDVIRESLRMSPLGLFGLVR  
KVVAKGGIVTSDGLHIPEGAIVAINHYGEQVIHERHENADTFDAFRFSRPRESLMTNDAVQNSSEH  
EAANVIEKKLASTSTGVGLLNFGHGKHACPGRFFAVQEIKLLLAYILLDFEIQYLKERPKNQFLGTS  
CLPPAKATLVRKLCSRP\*

>CYP5077E1|12176|Grasr1

MLDGIVVAIFTVAFSLVTYGEVVRIAHDTVSFASEEAWDEIYAPRRGHPWAVRDRDFYLALGDQAH  
NIVATSNTEFHQRAKKVLSHSFTAVSLLNQHVIIERHAETLVRKLRQAVYASVAPIPVNMTDWICFF  
AMDVIGDLAFGEFPGCLELGDYHEWTRTLIEYLNIAFAVAPIRQC�LLGFLFNKNRNRFELMSHEEI  
LSTFNIIIVGGFETVATVLTGIITHLIQNESILQQLCHEIRSFRFRGSEIEARNIANLPYLDVINEGLRM  
CHPTPDGFPRVVRPGDDYMGVWLPEGTKISVHMLTVNRSKKYFTDPDCFIPERWLGGNKRPARY  
RNDRLSASKPFTVGYHSCIGRHLGLVEMQLVLARLLWAFDLRKVPGCDVKFDDFPVIGIIQKQVVP  
VLLKVRNINNDNC\*

>CYP51196A1|12380|Grasr1

MQLLTASLAFATCIAYYVYSFVSSYATARRIGLPILLTPVHPFNFWIILGPLIIKLLQSIVPARLLFRL  
DVAIRGYEFRLRNKLHENLGPTLLLVGPGCVQVVTTRDAEVIRKVTGHGTSKGFAQSALIEQITGIFG  
PSIIGANGEDWQRHRKIIAPIINERISLTVWNESVQQAEGMLDHFVKESFGNTQSATDQSIKGLRRIVI  
NVLGSSAYGTPRAWTNHEEQPPPGYKLGYNLSLLAIADHQAAAIFFSPRTLLLSIMPFAFAKEVGTAK  
VEFPRYVESMIAKERSSADVERHNILSAMVKASDRGRDASESDTKEAALSIAESEIYGNLYLFTLAGY  
DTTSNALAFAFTLLAIYPEWQEWLIEEINLVFKNGDLSYEQAFPRLRRLALMFETLRLYSPVEHLTR  
TTIGPQTILTSSGSNHTIPSGLDVIVSQAGVHVDPDYWPPDPLMWKPSRWITDTSSDDNEKFQGVK  
HERLMEPEKGTFIPWSFGPRICPGQKMSQVEFVAVIATVFRACTIEPVVLPTEKTMDEARRRLAGILA  
DSEPTVSLSMKRPDEVVVKWVRRH\*

>CYP5105A6|12927|Grasr1

MPAEVRNKIWRLYLEEEVYIGSRNKTENQGLAKPPGLLLTCKQVHTETIRLFYASACFLIGKKSCLR  
QWLSGIGTDDASLVQNIHLKETHGWTEEDLHYLDMVKEQARMTRVDVVSLSKQCDLKAGVLKGY  
AQLARAYTVNPLQLVREMLKVADYAYPYGWHWTEEPPEKLRRRLRADFELISVLKEAGDKKEEEER  
ARRRELAKMPENFMEWSRWILYGAIWRLFLSPLARIPGPKLAALTWWYEFHYDVVQPGKYVFKIQ  
ELHKKYGPRIIRVTPCELHINDVDFLDTVYAPSSQRRDKYEYQLRTLRIPTAVGTTSYHLHKKRRETL  
SPVFAKKNVLSFEPLIKSKVDQLCHLIEEFAAKGSPANLSDAFFAFTTDVVTNFLFALQSNVLADPTK  
AAVLRNNSNQLLLGKIVNQHFPPWIPDSFESPLSWSKHLMPPGGLIDIMELSGRTDEVKSTFQPTKLPP  
VCLIGEHWYFRGIRVRSELLEIHKARDEGEKQSSYDGKRSVFYTLLESSVLPPAEKAISRLEQEGTLLV  
LAGSESPARSLTIIFYHLICNPGILQKLRLLELQTAPIDASWSRLEQLPYLSAVIEEGNRLSWGVTARLA  
RIAPEPLRYGSYTIPAGTPVSITTLAHTNETIFPDPRSFPDRWLGAEGATRRKYQMAFNKGSRKCL  
GVELARAELYLATAALARRFDMALYETGADDVAFLHDYQVAMGKLDSLGVRLPKMRNDSQS\*

>CYP51179A1|12972|Grasr1

MHNEDGLLSTLAASPLLWAPISVALIFIVNSLKSRSKPSTDFCADTISGDDTTDVRKSLVWAFEKYS  
KNGKLFKIAMPDQDTVILPPKFIPEIGPLPEKKASLYAEFAKMFLTQYTLLGIAVPLDNLTHLIRTDV

ARRMVECIAVMEDESSFALTEKLGTSNEWQPPAFLTVLGLVAQITARIFVGLPNCRNPEWLHLFAS  
HTRSIRNGAAALRKYPKWLRLPLAASFVKEMRDIHYARKKMRELVTPIMNERLAKLKANLDADLPS  
DFISWTLKESRGQAWDPFIQTEYQMGVAFGAITTTYVPHPSILSQYSHPPRTQLFTNVLLDICAHQSS  
IEPLRAEWQSMOLDSTNGIISKPSLMQLPKMDSFIKESQRTHPNTLLTFSRYIASDFALSDGTILPKGTSV  
ATPLYAMNFDRLSFEDPEMFDALRFEKMRKQAEIEAGGKKVQRWGLWGLTHSDAVENMNFQFG  
KHACPGRWLAANEVKMLLGKILMEYDVRLEHPEKGRPDNILIEKALVPDPTKRVMFRRR\*

>CYP65FU1|13049|Grasr1

MASNSVASLFYLLYGLGRAVYNVHFHPLSKFPGPPSRAGFWLVDLLELCVGSKIWEEKALHEKYGP  
IGKKQLQKDPAFYSNPQSGSDIITANDKDHTRMRKLLAHAFSDSALREQQPLMTHYFDLLIEQLQK  
QIDGPANGKVNVAWYNFTTTFDIIGDLSFGEPFGSLANGEYHNWVATMFAGIKFSRFIRVAYRYKL  
FGVVLGIFYKLFTAVGEGRKKNLMYAHDKALERLSAKTDRKDFMTYITRYNDERGMTERELAGNT  
GVLVIAGSETTATLLSGATYFLTKNPRVWNKLKDEVRNAFQSAEDIDIVSTGKLPYLHAVLEESLRR  
YPPVPSRLPRKTGAEEVIDGHVVPKTSVGVTQYAANHSPANFNNPEVFAPERWLPNPPAEYAN  
DDKASMQPFSLGPRNCLGKNLAYVEMRSILARIVWNFDMELCPSEHWAETETGNQKAYVLWEK  
PPLWVRLQRREKD\*

>CYP617AA1|21|Grasr1

MAFLGGTSFLVVYAAVATALIRHHVPEYLILGSTTLTFVTGILTLFGLSFTYNVILYPKFLSPLRDLPM  
PPDPEFIMGHGRTIIEPTGIPARRWINSVPNSGLIRYLHIFNQERIITVSPKALSEVLVTKSYDFPKPDR  
SRTALVQLLNGVVLVAEGDAHKFQQRKNLMPAFKYHHVRDLYPIFWSKSGEMINVLKSKEISTAIESD  
PSLDAKGGYGFEMGNWLSRCTLDLIGIAGLGDFQAIQDPHNHLNEIYRTVFSPSGGLGMRLFLAA  
TAFPPWLMQRIPIKRNKQLAKARHEIRAIKRPQTSPPPAPTTTTPTTTINPSDHDDDDQPQRSQK  
DILSVALSSGAFTIENLVDQTMFLAAGHETTATVSAWALLELAQRPSLQSAIRAEIRAAALPSFSDCD  
EKGRPLKTNIPMTADLMDKSCPLLHAGTTVFICPWAVNFSTEQWGS DAGEFRPERWLVPPEGEGKE  
AHAKAAAGGAESNFSNLTLHGPRSCIGMGFARAFAACLLAAVVGRLEIVLDLEEIKKKGLKVGEV  
QTTGVVARPKGGLRVRGRVVGW\*

>CYP534Q1|138|Grasr1

MLSLALRALGALLLFWTAKNLWSWKKNIDAAKASGFRYIPVPVTIFSLVWLIVNGPVMRVLRLIPK  
QHRPLWMDKMESMHSWKDLFSAYDIDPQAATYLTVSPQKCMWLTAHPEAITQITRRNDFPKPG  
RMYRSINIYGRNLVTVEGQLWRRHRKITGPPFTEKNNHVVAESIRQATSMIKSWTGKDGNSSRTI  
TTIAHDAMRLSLHVISRAGFGVRLSWPDDDEDANESGKAGEMSATNLGTGHEMTYTEALETLLHN  
MLPVVAIPHSLKILPFFKTKLAYQSFIEWGKYMNEMMQAKKIQLASGEDEEGGMDLMGALVKS  
GYGASNTLEKGSSQAETLSDEEILGNAFVFILAGHETTANTVHFSLVYLAMNLAQRRLQADLDSIF  
QGRTPQWDYDFDLPRFLFGGMTGAVLNETLRLIPPAIHIPKESPQPQSLIEGKEYTPGNSLVLLSA  
VGVHRNPRFWPHGPPSNPDKPIHETSNRDNDLEEFKPERWLLTGEHATCTTANPTSTSNTNSGAT  
KPSLALAPDSLPSAETEDLAVNTAADTAASLYKPEKGAYVPFSEGRSCIGRRFAQVEVLVVIALV  
MYGWSVELAVDEWASDEEVARMRKGEKEEVYEKAREKALGKLRRNMRTVITIQLRGGSVPLRFT  
RKGGERFER\*

>CYP51182A1|394|Grasr1

MSSTMLPTDIVFSNDRDALFLCLPLVILGIYFSYKFCLARRERLNFQTHKCSATGPSYPGISFLFGYDF  
LLENVFNVIKYRFTQGVAAERFERYGPTFKSQILLKGIINTIDPENLEAVFKTHFEDYKLISAREYMMKT  
FYGDGIIGNSGHEWKKSRIVHPAIALNSPDQAIQDRHASHLVEAIRSLPAGPFDFSKYASEYMLDV  
ASEIFFGESTNVLQGGQGDARLRQFATDFTMLGRMARVMTIFNRQFPFLRYLMFRNDYRPTTQRV  
NEFVDIEVQKAFASKQTPPPSPAEEKQEDFKTTRTPKTLVEGLASQCPDKQVRQETLNCLLPARDSN  
AIVLGETLYKLARHPKIWAKLRQEVSDTLHGSAAPTIALDNKMTYLKYILNEGKSIHTSHLPPPSLI  
LLPHPNLCILVRLNPTISTHGRALATRHFLPRGGGPTGLSPLFVPRGTYVVYSIHALQRNPAVFGPD  
AESFRPERWENVSPKQFEYFPFGAGPRVCLGKTLGWTMVAYAVVKMAQGFREVLPREDSPYEEAR  
AFGFMNRCCGAWVECLGDEEEKGRGGDEGDGW\*

>CYP52Z5|641|Grasr1

MLNLELAIAEQHGCCKPVTPEVPYKWPLALDLVKRQIDILYSEHTFELLTPYINIVGTVRVETFGATGF  
VTTDPENIDSILSTHFEDYGLGSRRLKQNLQVFEAHVDELIDGLRYAAETGGPVDMKPLFFEYTLNT

TTNLLFGEPHSSLSKGSSEKRPTDFRKTCKNVRDWATFFSSKAMKYKDDVGEEEP AEKYSFIIDLWK  
KMRDKRLVRDQLLHILVAGRDSTAALLSWTLYVFDNIDLTLALLIHTKLSPLRLYPTLPLNLRFA  
NKTIVLPRGGGPDGQSPILMPKSGIVWSVYHLHRLESIYGADSKVFRPERCESGELFKKARSGAGY  
VDFNGGPRLCLGKDFALMEASYAIIRILQAFSAIRLPRDVPNEPVGA EKQTYTIGVTPTDGVKVLLY\*

>CYP505AL1|1642|Grascr1

MTTPIPSPPALPLLGNAFDLNSDYPLGSLLALAERYGKIYKLN LGSDRLFISSNALINEVSDEKRFEK  
AVSGGIRQLRALTHDGLFTAITGEHNWEIAHRTLVP AFGPLPIDAMFDDMHDIASQLVLKWARFG  
PENKIVVTEDFTRLTLDIAITAMGVRFNSFYSNEMHFPVVGMLAVLDEAGQRSARPTLVSRFMSSK  
QYKYDQDIAFLRGI AKDLLDQRRQHPTDKDLLNAMIFGKDPRTHEGLNEQSIIDNMITFLIAGHET  
TSGLLSFLFYHLLKNPAALQRAREEVDALVGTS AVKVEHLRKIPYINACLREALRLNPTAAAFSVQA  
KKDDVLGG EYFVHKGQSIACLLPAVHRD FEVYGEDADVFRPEPQLAVVM LLQNFDFTMDDPSYQL  
EIKQTLTIKPKDFFIHATLRHIKPKDFFIHATLRHENPIAGSGGVEHSATKPKTKTPTQSTPVGATGT  
MSIFYGSNTGTCESMANSLASAAAAGHYKASVDILDKAVETKPKDGPVVVITASYEGEPPDNAVHF  
VNWVRNLKGKALAGVKYAVFGCGNRDWVTTYQKIPKLVDDVLADRGAERLTERGFADANDGEL  
FDTFDRWQDEQLWPGIQEAFGKQDGSDETENDGLTLELSTSSRSNLLRQDVQDALVTENKVLTAS  
GVAKKMHT EIQLTGTSYTTGDYLA VLPLNPSRTIRRAMARFHLPWDATVKIQPSSRTALPSGRDIG  
VFNIFSA YVELAQPVTLKQATKVAASIPDADLR SNLEQKISTSFKSEIQSKNLSLLDLLEQYPTATFSL  
GQFLDSVPTMRVRQYSISSSPLADPTKCTLT YTVLDQPLAHDPTKRYLGVASNYLALAEPGDRIHVA  
VRPSAGFHPPKDDTATPILMICAGTGLAPFRAFIQERALKIEAGKTLAPAILFYGCGAPD TDAMYS  
ELAKWEEMGAVSVKRAF SKKPEKSEGCRYVQERLWKDREKAAGLFGQEAKIYLCGSGKVGE EVG  
AIKRIYGEFKEREKGEKVGE EERE EEWFRGLRGGRYWADIFS\*

>CYP5042D1|1654|Grascr1

MEYVQTGPAALILLFTVALWELSKPIDKRWISLPSRWKLPPGPEGRPIVGNLLQFFRARDSSG GITPYL  
DSLSKYGEMTTLHMGSRIWVILNSDRVSDILVKY GKQTQERPYPMPVGSGLVSNDRWVFRQSPK  
WQEGRQVVQQLLNGSYLHLYGDWYQTESIHL LHAYLHDPQHWFAHHFRYAVSVLYCLILGEPFD  
KSKADLDEYQRVQTEFTLSLRHYVDFFP WMAKLP SFLHYWAAPWK RMAANHRAFFASWWD PV  
AS AIDAGTAPPSFTRDSL LHPDTKYRG TRE EAMYLALS NMGAGSDTARMMLNTFVMAMISHPSAL  
KQLQSDLDQVCNKDDGTLRLPELADMPSLPYCAALVKEVLRWRPTVPLNPPHELTVPLEYDGYFF  
PPGT AFLINNVALKDPRWDDGGVFRPERFIDGKG GEMDPVLGLWAFGGGRRICPGYRVAQQALFV  
AYARIA YCFDIVPRGDVDDTVLRREILGEPFPVEIRVRSEAHGK LIEEEEERTKVDGW WPGQVAVGG  
LSVLK\*

>CYP505AM1|4286|Grascr1

MSCPFAPDATGPAPHPLPDDMTESRTAQSTNSGAVVLPQPPEHLFGVLGNLPDIDPSNPPMSLWKL  
ADLYGPIFKLKL RGNFVIVCDEKHINEICDETRFEKFVNPI LQQIRALLGDGLF TAHQPEKNWALAH  
RVLVPSFGPMSIRKMFPEMLDIASQMLLKWDRQ GKDH AIDVADD FTRLAFDTIGFCAFSYRFNEFYS  
DKSHPFAEQMSQVLLESGRRAHRTDIENS MHRWSEQLRQDNVKKMHAVCDEIVADRKRNPQPD  
NKDLLNVMLTKADPVTGEKLSDESIRFNLCTFLVAGHETTSGTLGFCMYQLLKNPEKLLKAQQQV  
DEIVGDGV LKLEHLTKLSYIDAVIKETLRLTSP IAFSVHPKEDTMLDGKYPVSKDTLIEVLIRPLHHD  
PTIWGEDVEEFKPERMLKGRFEALPPNSWKPFGNGMRACIGRSFAEQEMLISVALILQRFQIEFADPS  
YELRMKTTLTMKPSDLKIKVSRRP GKSLMTGLPGGGLAEPTLQSTKGTHAGDNRSSKESKQFPLAVF  
YGGNSGTCKAFAEDIETKAASHGMKATVESLDSATEHLPTDRPVIIITASYEGKPPDNAGKFVKWLE  
LGAE EQRLRGVNYTVFVG VNSDWASTFHKIPKLVDQTMHQMGAQR FIEAGYTNVKGDMVGPWE  
DWSDKLWEGLSQISGSNTETKTDNGLEVT VKLSSTKTTLGTEKIKTGTVLANYELANADIGPAKRH  
MIVRLPEGTSYESGDYLVVLPRNPSDTVQRVLKRFELSDDDVLTIANSSKKFLPIEPKSAIDVFSTSVEL  
GTPITRRQLATIA TFAPENLKSTIAL LGTDDAAYSSLLEKRYTILDILDEHPTVALSLSVYLDMLPPLST  
RQYSISSSPFAHSPDQDPSIMIKIPPLQHAPLPTTSSMHPPGPLTAFSAASHHLTLLPAGPAIKLIASFA  
QQLLASDYPPTLQHL\*

>CYP51197A1|4884|Grascr1

MPSLLSALQTLTYSSSTMP SLLSALQTLQVQIPSLPFILLSFFFIYLT SRLYHLRRHIRLAKSTNLPYILSP  
LTFNSFLILLYRPILRLLSYFPSSLTHPWISVISPLSSWDNGHATYSSLSSDTFLIVTSSGITMRTCDPQVI  
TQITQRKNDFVKPVETYKVTDIFGKNVLSVEGDVWRRHRRVVGPSFGEGVNRVVWGESLRQAEGM



VGSWVCVGGQEEGEGMGWGKVESLAEDCMRLSLGVISRAGFGREMSWSEEKSAGGREVGEGHD  
MSFQDALAILVSSVYLVALLPRIFLRFIPLSLRRGYQSFVEIKKYMLEFKQQAEEDEPEGGRGSSLLK  
AMVNAAATADGDDEEDALKQGASKQSFTQDELFGNAFIMIVAGHETTANTLQYAMINLAMHPK  
VQRRLOTELDEAFGSRGQSEWSYEDDLQKLLNGLPGAIMAEQLRVQSPVAGIGKLTLDQALAVN  
GDNHILPKGTLIYLDTTGAHLNPEAWKDVDSDNLGSEFNPDRWLKKTADSADKDSERSLYQPEAGA  
FIAFSAGARSCIGKRFAQIEFVAVIAGLFREWSVELDVEGQASAKELLSMTEIEKKAVWERARQDVK  
RTLKDKMTIYLTMQLENGLNIPLKVVRGKEMFGDWA\*

>CYP6677F1|5185|Grasr1

MHFSLYAGVPVLTFAWQTLALLKNYKTALSIGLPVLRPLFGLAKWAKYTYLDWQFDDKHAIHDE  
LGPAPVLRMPSLNEVIVADPVA AHLALARGE EFVKPSIMYSYLN VF GPNLHTVEGETWQRHRR LIE  
TSFDERISASVWTEANFQAGQMLDSWLSRGKQGTHDTV KDTTALALHVQTYAGFGIKYDFKDSNT  
KLEAPHRLTYRDALLRVHRNFTLLKVGEAFSECVLYMQEMIHKGKTAINTGPKGEPDNLNLVQ  
ASHKIFIAGIIDNFEAGLKNNGKLDSDPFFPTKGLYDSELYGNLFIYAMAGHESTANTLATSIA YRAA  
EPRRQDWLHEEISQLQLPNTLPPSPNLSSTPTRPYLETFLLPRCLAIMHETLRLHGSTVFLPKPTPS  
NPQQHKSEPYNHPLHLRSNPPFPPLYFRNNKLPSPPYRSRDLGSRRFGLATRSLDKPRCHNGQRK  
HKRDERRGICRLGRRATGVSREEVWYGGVCGVYGCAGGEGEGGG\*

>CYP51161A1|5870|Grasr1

MALLQALTDSGLLLVLQSLLLWLLQKV FVFVQRRAKRLSLGCKNPKTCPLPDGVALSLASRRRFQR  
YALHPGQGD LHKKFGHTFRTTNALSGDTIYSMQPENIRTVWSSGFKEWGVENPRELLGPLCGKG  
VTTDGELWKKTREALRPHFYGSTADAIDL DLENHLQRLFLKIPRNGEALNLQPLWHDLA FDMAF  
VYLMGEEIKDVPGLENLSTNIRQQMDYGMVGCRI RYSKGPLKVFHKDAKWQTALKDIREFTSAV  
MKRAIERKQALRKQALDERAHTSNDGKEYPESKLLIYTFMRRWPKRNDLSEGLIQYFVGASPAVAG  
FFTNAMEHLLSLKPEAWNKLKLEASKLSGSPMKEDCKQRRLPYTMSVFNETLRMPFTTLEARS AKH  
DTILPYGGGSDGQDPVLATKGTMFKANIWALHRDVS VFGPEPEAYNPDRWDEIKPDRWQFMPFG  
GGPRVCLGRDKARTEG

>CYP578AA1|5984|Grasr1

MLFATIITSAILALLYQYIVYPLFFSSLRRI PSAHPLARFTSLWILYIRFAEWENRTVHAAHV KYGPVL  
LGRNEISVNCVDGGIRNVYAGNFEKDSY YEFFSNFGACNMFSMIAHGPHSVRKRILSHVYSK SFIQT  
SPTMAA IERILLYERLLPLLSRAGKALDAYLLFN TAA LDAITGYVFGIRSATSRLSNPEAHQE WMD  
KYFMRMPYRY YDQDISHFTSPLKRIGLNFV PKAVYEANDAIENWCHGLCESASEVIEEIRGGKY IKA  
ENVPVVDKLRGALEKERENKDQIENSIPSN GQSSQAPIPLQLEIASEVWDHVAAGFDTSGIFLTYA  
AWELSRHPEIQRQLREELLTSPPIVISSAPSLPR PQD VDSLPLLHAIAMETLRLHPSIPGAQPRSTPYP  
SCTLGPYMDIPGGVKINAQAYSLHRNEA AFPKAE EWIPDRWLSKLPGETEKKERWFWAFGSGGRM  
CVGSN FAMNSNKHILA AVYSNFRTVIEDDEGIEQSDAYTAP PKGQRLMLRFEGLGQEEK\*

>CYP51158A1|6687|Grasr1

MCQYAEITVAIPLAARAIEKNRGILALGVSKPCCLWCQYYLEELNKFYEH RKFEFVYKGTHGKQP  
GGWLMPKEAPP IIANVMKAFVTAKIDQIFIRV GARRAPSAESIELDMRLKEQTQIQTVWKPVTWNS  
MGQWDGDR LTSKR FQKQIHGIHIPYLIGRHLSLLRMAVAIPVLTHVLAGVFSLDLKT DENPEGFYDI  
ATPYNPARSWNRRRDARKACSRLRGKTKAYLKRHLPHLPDSKPEDVGLWQKIAGFFQGP HFRAS  
HIEKGTIRWYGLQVAAKVVA AVGDLDKAADILTTVAFAKSYSYLLSTNAQEYQKLSTLSLGKGKD  
VDNKIEGYMYEAFRLSDGLKAIRVARSDISVDGVKYKPGDVIVIPLGKNGAGANPEGFPDPTASKPD  
RKRDSYILFGWGQHECIGKPISNQYVVAM LKAVTGLQKVQLNEGAFRRIDVRLQDYIISP DGSELER  
HPSSAKLTFTTYTRDASKLRPSIYTIPPSTIGGERTTAPPPSKSQAPPKSNNGSLIPTVCTHAIRPQDIGR  
EMWHVDHHTEYSTEVSIS\*

>CYP547M1|6952|Grasr1

MAKL RDVLVALSIAAALETVLLNLFAPHLLLADRFSRSILRFFLINASLFTIWRIWIY PFFFSPLRKLPG  
PKSGNILWGHGAPEFIKKPPGSDFLTWSTSIPNGGLLYFRGFFNNDRLLV TSTETLKAVIGDNAYDY  
EKPAPVRSFLLQILGAGLILVEGDEHRFQRKHLLPAFQNKQIKDLYPVFWGKGRGLLEAVGEELREG  
GAGSGSGFEGGTGGGDGSGGANATARTGASGVVEFGEWATRVTVDIIGLAGMGRDFNTLKNSD  
DVLVQNYNSLLEPSRANALYFASNLFVPQWFIRALPWHKNKDLARTTGNLHRYCIDLVHERQAE  
MKSGRAMDKMDILTLLIRS NDFKDEELEELADQMLTFLAAGHETTSSALTWLT YLLSLHPTIQSSLR

HEIRTHLPSPTFSSSSPSSTSSPTASDIDALPLLNAVCNETLRLYPTVPVTIREAIRPTTIPYRSTPSTSAS  
GTTDAGAGTSGASEYGDRLYAPIATGTRILLSPWAINRSPDIWGEDASQFKPERWLGTGTDGTDGVA  
GKTGGLSGSGSNYGFLTFLHGARSCIGQGFAELKVLAAAVCGRFEMRLEGGDREVERFLLRRFV  
DGLK\*

>CYP5042E1|8285|Grasr1

MTTFHMGSQLWVVLNSNQAVTDILLKNPRTTLGRPHMPVADGLISKGKRSVLYKEQQWSESRRM  
MRSLNQNALGTYANYQDIESIKMLKAYLETPKDWHRHHAHYGASILYRSVMGAPFKKSTAEIDE  
FQLLIMSFLKDLMSRVDYFPMLRYLPLQPWRRSWQAKGDHYERVVMRWSSDGAKLAQAGKIQA  
SFVRDFELPEKPESQGFNDQVIFLANTIMSAGSDNMRMTMNAFIMASVCFPTPYARARQEIDSTCG  
GGGGNDDNDDDGSETSQQSALRLPYLSDVGSMPYLQAFVMEVLRWRPVVPIGIQRELGEALSYKG  
YRFPPTGNFLINTVTCCCKGVDPDDFQPERWMDATKPPEQFFFFGAGRRNCVGYKFAEQGLIIALSR  
LIYCFDFAPVILCEEKQAGPIDSENLPWTLGEPFPIKATCRSRAHAQLIKSLLL\*

>CYP613T1|8614|Grasr1

MRQYPIHHNATRDPLPTCPYTFPNGQGNIKFPSSGLSNSTLWSQQHGSVYRIWCGTKPEIVLTRA  
HVKAVFRDSRHTKAVNNNSGYFMQQLLGQCLGLISGAEWADVVDVHAPFARAAMEGYEGFV  
VQEVESFFARAYEGKKEKRIAADCKSEGDMLPFFIARILYGELTPDVEAQLQQLAVEREALFHHVI  
QGGITRFHLSRLPTKANRELGAFKHKWRAFNMSVVRQCSCGQSEKQPVPPVPMYAEVERGRITE  
EQLLQTLDEILFANLDVTMGAVGWTLVFLATHSRLQEKIRTEMHEWPQQRREQGSGTHKYLLST  
STLLHASILEAARLKPLAAFSVPQAAPTERVVDGYAIPRRTDFVIDSHLLNWDVEFWGKDADVYP  
ERFLEKKGTELRYHYWRFGFGRQCLGKYVADLMLHVLVAQMVENYRLENETEREKWTRIEKTIW  
SHPKLDLKWERR\*

>CYP6839C1|8645|Grasr1

MLAVRRLEKKHGYERVARYPHTDWLLGSDLYRLRKQALKHGRLMKLYESHFAMCGKTFEENFLG  
VRVINTMDSANIQKVAALSFQDYCKGFTRKGVTSFPMGKGITSSDGMWVKHSRLVKPTFSKSELS  
TEGLGQFVDRFLGLIPRNGETVDLQPLLHRLFLDISTEFLFGQPMNSLDPEALFDFTKFLQALDEAL  
GVGKRRQAGRLRFYFYFDKSWKRAYDTIHSYINEHVQRALHTTQDKAPPNTKYSTKWQKKFIDLC  
KTSATLRETPLTLETLRQGPSGRIFRQSVHEIILPHGSGIDGRSPVLVPKGTAVALNLWCLHHDPI  
WGEDVHVFKPERWNEKRLSWEFVPFWGGLRICPAQQQVLTHAVYVLVRLTQEFARIECRDDSGQ  
DYVELVKMTTQSRNGVKVALYRDKMKF\*

>CYP6001C41|9786|Grasr1

QRGKWAEVFTRSEQYRRRTAAAAAARQWSEPDHSVTRGDVESSFEQFAQLIHSSARPLPTQTGDGS  
YIEHEASSSLFQDLRHLGFKDVKTIVQTVSNKASGALTDDKTMLMEHIIQLVAGLPQNSKSRMDLT  
NAFLNELWVNLDHPPGSLGDKYQYRQPDGSYNNIHMPMLGAANTPYARSVRPETMQPGSLPDP  
GLIFDSIFARTEYKEHPNRVSSILYYWASLIHDLFQTNHRDMNQSLTSSYLDLSTLYGDTEEDQGWIR  
TWKDGKIKADCFMEERVLMPPGAGVILIMFNRFHNYVVEQLAAINENGRFSKPKDGLSAEASEK  
AWAKYDHDLFNVGRLITCGLYMNITLLDYLRITVNLNRSNTTWLTDPRVEMDKRRTTKPEVYCPRG  
TGNQVSCEFNLVYRWHSISKDEQWTEAVYNKVFGRASEISLPELLKGLGQWEASMPKDPQKR  
EFGGLKRNADGSFNEDLVNLAIAEDVAGCPGALNVPTALKAAEILGINQARHWNCASLNEFR  
KFFGLKPHQTFEDINS DPRVSEQLRHLIYEHDPDFVELYPGIVAEDHKMPMPVPGVGICPTYTVSRAILS  
DAVVLVRSDFRYTTDYHPKNLTSWGYSTVQYDLNIEQGCCFYKFLRAFPNHFKQNSIYAHYPMTV  
PSENKIMQSLGREGDYDYKRPTFIPERIVLTSYKAAKYMERSKEFNVLWGEATAFVMGPRAWDF  
MLSGDNALHRQQKKTMANALYHSNWEKQVQAFYEYITLRLHENSYKIAGVNVQVDMTRDVTNL  
AHCHFAANVFSPLPMKSKENPKGILTEHELWSLIALLLTAIFFDFDPPKSFPLRHAARALAKQLGKLI  
INVKATNATGFISGIVDSFRENHNALSEYGVHMRKLLSGLGVEEITYSQILPVATAMIPNQSVVFT  
QLLDFYLS DAGKQHLP AIQKLAQQDTPEAFDKLMHYAMEGIRLHGTFASTSTISTTIDDDGKQV  
PVSPGDRIFCSFVSASRDPEQYEPDKVVRTDRPLESYIHYGIGDHTCLGRDASRVALTAMLKTIK  
NLRRAPGPQQLKTIPRAGGFVYMTENHGSYFPFPTTWKLQFDGEVPLKE\*

>CYP51234A1|10738|Grasr1

MAMNPIIIAILATLAISLALSWRKSNALAKKSNMPVFWWSPLAQLWSLWHPSTHFLAHSNTFLLT  
HPLSLPSLWTCDPKICTALMTSYPTSQLVPDMIEFFNLYGPTVGSVEHEEWKAYRRIVTAGFNADTH  
AAVWKETLGQAREMVGWVERDGDGNGEVKGLMKGWCCRLTLHVISRVFFGRGLRWKEEGKEE

GDGGEEMPKGHRMRYEEALFMVLKRLGMLYVVPVHVLLKRVPLRRFREA WVAFE EWTKYMKEMV  
RETREKVEAEIEMDTKSQKKGGKKGKNRSLGTTACISLCLTPWHNILDNTTTTLLNPTNTTSAESM  
ILASKSPSPSSSTSSSSKSPLPPISESALLGNTFFLLLAGHETTGNLTLSFLLLLLALHPAHQSSIHNDLLA  
LLSVRPLSAWTPDNEYTTLTRNKSNLANFIKETLRVYCVVQFIARRVVKDMPVVDAQGMRRIPAG  
TVAMLD FSAALRNPELWYGGNRQGDGVAANLVNEVLDS PAATEFDPDRWLEDDIDTDTNGKGG  
EGRGGGEGGRRAKAKAMEEAFFPFAQGPRVCPGKQFAMVEMVAAVAVLKEWRLELVVGKDV L  
RKCGGDGQKAWEEVRREGFRKLKRGVKSNTLEIGEVVPIKAVRR\*

>CYP51184A1|11240|Grascr1

MLPFYVILLSGLAALFGYLVLSKQRYRANQLTHGCSPPRQYPHKDPTGLGIDFLDTGKITTFEVSTL  
STPSFCSCEPANLQSVFVTNAKSWGVS YRLLALAPYYFAHYLDLMLRKIPRNGEPVDLQNLVFSLYL  
DTATLWLFGESFESLSGKGDKADEFTRTFA YSLGVGGFRMAIGPLQFLHRSRNWEESNRNTNQAFIEQ  
HVDRAIERQSKGDNEKQGNKRTAVLDLMAQQLHDRTQLRNESMHAFIAAHETTACLISNLFWVL  
ARHPTVWARLRSEALNAFGSTSSPYLNFEASLKLDYLRKVINETLRLYPVFPYHVRIALADTILPNPP  
PIRRLPLPRPHRAGRHYPPYRRRPGRCTARSSIWGTDA GV FHPERWDDFTPNPNQFGPFGGGPRAC  
AGRQKALMETTYAGHNEAYGGQTD PFTHLTQVNTTLLKNALAAITNSCPHLQLWTLQTGGTNYG  
FKLLDQPSFLETATYSPPHKESNLPLPPP\*

>CYP584AR1|11535|Grascr1

MFLFSLPWKFQLPLYPVVLWLLLRLNYSIRVAPARRRKALALGCLPARRCLRRFLGLEEVYLQYRYV  
KEHKLLFNHGHRELSEYGGTFSVKVMGTDVFSTNEPANVQHMLATDFANWGVAILRAPMVPLLGE  
GIFSTDGPKWRHSRDLLRPNFNRAQIAEVS MFERHLENLVK CINRERRGETVDLQPLFLRLAMDIST  
EFLFGESTNDLAAESSPKITQFVESWDRCTKVLGGGANWKS IANVFWKDKQFANDCKIVHNFAD  
SIIEDARTRQSEESNTGVESSRYLFLNELVEQISDPVKVRAELLNIL IAGRETTASVLSNSFFELARRP  
DIQAKLRAEITGLNDLEFETIKNLRLYRAFINESLRLYPIVPMNARQAVADTTILVGGGDDQKSPVFV  
PKGGLVSWNLYSMHRRKEIFGKDAEEFNPERWLDEGEQK GIRPGWAFLPFNGGPRICIGQQFALAE  
ISYILIRLLQEYSSIESRDSEPWRESMQLTCVNFGGCKAALTPRS\*

>CYP52AA12|12097|Grascr1

MQTQYLMAVWALVAYVLYRLITSITERRYVAQAKNLGCEDAPTMPNNVPWG LEHIMAARGADK  
RKQFPEWLQSRYNRMGNRTFQHFVLGNQAYTTNDPKNIQAMLATQFKDFGLGERRQGTFKPLL G  
YGIFTTDGKFWEHSRAMMRPQFN RDQVSDLEEEQH VQNLMRALPTTSLSSSNAPTAGRWTGPVD  
LQVLFFRLTLDSACEFLFGESTDSQILNLPENAAQQIQQQQSHSKTTAATDEKTFAGAFDRGQNW L  
SRRSRLMNLYWLVDGLQERRDTKAVHDFVDHFVQLALKHQATLSGSKTNSTDDPSLEKGPGQPYT  
PRRNSSGKEKYVFLEVLAAQTQDPLELRSQLLNILLAGRDTTASLLGWVFWLLARHPDILAKLSAI  
LESFGPYSPSNSAEITYTSLKSCTYLQHV LNETLRLHPVVPVNM RQALRDTTLP RGGGVDGSKPVLIR  
KGQCVDYSVHVMHRLEGLWGDDAASFRPERWVG RKP GWEYLPFNGGPRICLGQQFALTEASYVI  
VRLLRFDGIQNLDGSVEATHNLTLTDCPSKGVQVRLREADKVEA\*

>CYP584J7|1995|Grascr1

MVNILQSALGAAGFYLLYCIYWELTVGASRRKLAREHGCKPIKKFPDWE PFYGLRGFVQNQRWFK  
EHTFMESVRQERFKLDTNTFSMKQLGLKV VATIEPENLKT IQALDFKKWSLGQRRIT AFTPFLGPGI  
FTTDGQQWAHSREMLRPNFNRSQVGDLATFEKHISHLIQAIPRDGSTVDLQDLFFRLTIDSATEFLF  
GESTNCLAPGTTTVSSNAFATAFNRGQESILERARWGKLGGLMMNHEELHKNTKYVHEFVDNFVS  
KAITRRNLGKTETSRVYFADELVTRTSDKFQIRSELLNILLAGRDTTASLLSNLFHMLSRRPDILANI Q  
AEIAPLN GNPPDFAQLKEMKYLRAFLNESLRLYPVVPGNSRQALEDTVLPKGGGEDGQSPMFI EKG  
TMVSWSLWTMHRRKDYFGEDAEEFKPERWLGEKGLRPGWEYLPFNGGARICLGQNFALNEASYT  
TVRILQNFKAVESRDDR PWTEWLT LTCTGLYGCKVGMVPV\*

>CYP584AT1|2528|Grascr1

MQLFQSHFQEKPFICTLIAACLSAILYFIYRSLRRHIEVSSFKKQHGCYDPPRYPHKDRIWGS DLVKER  
ATALKEGKYFTLYESQFERYGRTFEEFCRRQKTINTIEPVNIRHVLALACDDYMKD PARVRAQAPF  
MGPSVFS DGPIWKPSRALVKPIFARAELSDMDHLAMFTDRFIELLP SDGSMVDVQPLLHKLFFDVAT  
DFIFGEPLGALQPSMPASSADFIQSFKKALMWASKRREAGWLSWRYNHNKEWIDSYTKVHRWVD  
RQVARALKETEKIVDDIDGDTKASQP VQRRYVLLNELAKRIRDPIDLRYQVLGVFLPAVGGTANAV  
GNVLFQLARHP EMWKKLRQDALKLGDEPLTFEKLKSLSQFRYVVLETIRLIGPAARVVRYAKYDTT

LPSGGGPDRKSPIFVAKGTSVSMSTWGVQHDADIWEEPQEWKPERWRNRKIGWEFVPFSGGPRICP  
AQQQVLTHTVYLLVRLVKRFEGIENWDGVREFVQRVTVTVESGNGVKVGFKPAISESRGS\*

>CYP52P14|4646|Grasr1

KELLAQGA VLTPHKRLSYRWPFALDLLLEASRADQSGGILNFFLAIVGRTGNTFEQILLGFRGIDTQ  
DPENIEAILGTQFTNFSLGSRSDNFRPLLGHGIFLITSGLFSAFMFMQTRSKSFSTIQNEIEKFVASVKSQ  
TSKIVDLQPLFFRLTLDTTMAVLFGRSLEDLQAQGAGDESVFAQAFDYAQHRLAVRGRLGDLYWLI  
GGRKFRESCKLVHDFVDEIVIRALEQSSKTCATSVDSDGDRYVFLDALISKTKDRSVLRDQLINVLLA  
GRDTTACLLSWTFKFLAQHTDLQDQLRRECRELPSFTQGDLPTPAEIKGMRLQLNVLSEVLRLYPSV  
PVNSRSAIKTTSLPIGGGLDGKSPLIVRKGEAVGYCVYTMHRRKDIYGEDALEFRPSRWDEDRMKNL  
GWAYLPFNNGPRICPGQEFALLEASYTVIRLLQTFEKVERPADEPALQSHTLTLVVASANG

>CYP584AX1|5875|Grasr1

MDLRGATLLLFCIAVLVKVGLHVRTKAEQRRKARSWNCMQPVYLPQDDPILGLDLVKKRNAAIK  
AHRYYLSNKLNHEKFHGTYGARPMCTTIISTIDLNLRFMYGTNAFDWGIEPVRLFAPEDIAAWGI  
MTSDGHYWKTTRTL MKPLFSNGQPTDLPALERHVKKAITLIPRNGETIELHEVMNYLAFDSGTEM  
MFGKAMDSDLPAAVETRDLKCFSSRAKTEVFNRMMRPKVNALTPKPFWGWQCQRAREYIDQETKR  
LWENRLDSKTKDRHVLGADLARRVSSFEDLRAQVTNLMFSAYDGTGASANNVFFHLARHPNVVK  
KLRQEILSLGPVELTAERLRDMEYLQWVINEAYRLTPPVAMGARTAVRDTYIPRGGGSDGSSPIFIK  
GQTVFTPPFALTRRKDIFGEDADSRPERWDKLDLPRWSFIPFGGGPRVCLGQQMVMAETAYIIVRF  
LQEFQSIENRDPVIDFVEHHQVTLISKNGVKAALIPA\*

>CYP584AU1|13055|Grasr1

MALLLRCTIGAAACGLLLWIYQQVGVYLA FVSKRRETGCFQARTYPHRDGIFGYDLYKQRKRALEE  
GNMQALYTREFDQLGKVFRENFLRQPVINNMDALNHQYIHALGWKDFGKPLIRAKANGPILNG  
IFAAEGSEWKQSRDIIPKIFAKAEVGNMAMMAKHVDHFLDLLPRDSGTFDIQIMFKKLFLDLSTEF  
FGESIDAQTPKGAPKADGFLKALDEALLGWNKRRQAGILMILHSFDRRWPRACQRLYNYFDKHVY  
RALETTSTVDLTREGGKEANEDEGKARVDP SRKYILLYEMAKQVRDPVQLRFELLNVFIPSHGTTAA  
LLGNVFFLLARHTHHWTRLRKHALSLPFDPADPSALDFARLSLLPFRYVIQETLRVLGPAGRVFRA  
ARYNTTLPRGGGPDGLSPVFIPKGAVVMSSTYHIQHDRDIWGEDADEFRPERWEEPHNRGPWDFV  
PFLGGPRICPAQQQVLVQAIYLLLRMVREFESIENRDNMLEYVEQQRMAIESRRGVQIALRPG\*

### *Umbilicaria pustulata*

>CYP5087A4|99251|Umbpus1

MLAAFLAAFSILTVPITVKVISLCSKEKQLSKFDGCDPPCERPYDYFGVVNIIAATRHLLNKTALAN  
TVDRFRTYGETYVTRFLDQRIFLTCDPRNIKHVLSRFIDYDSTVRVHLFLPITEHGIFAVDGPWEWR  
ARNVYRNVFSRTRSII DLNVQERQFQRF LHRIPPTGEPFDLQALFLKLTLDLTTAFALGESVDSLSPSQ  
SDEKKQMVQSLLYAKKIIARDGFLGPLRLLFGRRD FYRACSDVHRYVERRIEGVIEEKRQQGEDGGL  
EKHLKGFNLLQALADNTDNVLELRDGVISIMIAGIDSVASLLSATFWLLARDERVF AKLRASVLDSF  
GQELPNYDQLKGLTYLRHV FQEAMRVYPPVPFNARIANKDSTLLYGGGGDGNSSVLVKKGDKVIF  
SSWASHRSLKTFGEDSHEFRPERWEHLTAEELMGYIPFNSGPRACPGQQYAMMEASYAAVRILQNF  
SEVKNRDPRGWTEHIALSLSNGNGVLVELVRKSEVQNV\*

>CYP6677D1|99316|Umbpus1

MSPMWALSNNRRLRPWLQQLPWGLSDFRYNYIGWGFDDKYNAHKKLGDLFVHVT PNEIEVYVA  
DAGAADAITSRRKDFPKPTVMYKPLEVFGPNVD TVEGREWQRHRKITTRPFNERNNSNLVWVESLR  
QAQGA LQWWTEQPGLGANTTAEDAKSMALNVLT CAGFGKPYPFASRLQRTDENQLDRDMTYQ  
DALSI VLENLLFLFLIPHRLLSFSFLPKNLRTL GKAIQVFKNHMVKMLHRRERGLMSKHDPGADNLVS  
ALIRASEEVQQNKNVDEPHQGLSDDEIFGNIFIYNLAGHETTANTLAYSILLAAYPEYQDWLAAEI  
NKVLEGQGETETWKYEEAFPR LKRSMVMYETLRLYGPVTAIPKCTTNTQQLSIHAKDYTFPSNTYI  
YINTSALHTHPRYWGS DSLTWRPKRWITPNPPSNPPTQSSLA AETIADPIKGSFMPWSEGARVCPGR  
KFSQVEFIAVLAVLFRRHRTTSL ENGRRLGGDATADDAAYEYFVSMDD\*

>CYP5105E1|99411|Umbpus1

MQLAIPVYEWIEACNDRAFLEQSSARAPPSPFMSLPLEIHRMIFSYLGDYADV FCLSLVDLYFWRIGR  
AVLMYEVL SVLCPLANRALICV GDETSTEPPDYPAGLLTPDEVEELQAGLSDDDDDGEDDESCTYN

RPENLYHLAAARYNYIARYIFSTFPELYFSPIAKIPGPKLAALTSWYEFYYDVIKPGQFVWHIKDLHE  
QYGPILRITPWEIHINDPDFLDEIYAPSFNREKYSFQTRTLKVPMSMGGTIKHDLHRKRREALDPFF  
SKKSVTVLESMIRHKVNQLCELMEDHSKQEIVVSLSDVYFAFANDVVSHYSFGHDNNLLGNEIKSST  
QRNNISRLLEVKVINVFHGSLMRALNMVAFSDNIRSEIQQALSDKDRVNDGEKRSIFYELRDNPTL  
PQSEKELSRLEQEGTLLVMAGTESTAKSMAIAHFHLLSNPEDMSKLRAELQTVPKTASWTQLEQLT  
YLNGVIAEGNRLPFGVMGRVCRIAPNEALKYKGHVIPPGTPPERWTGSEGVARRKYQMVFNKGGR  
NCIGMNLAAHAEMFLALAAMARFDMTLSETDFSDFVEFQHDFHVAYPKLDSKGVRRARVQAKAVEA\*  
>CYP5192G1|99775|Umbpus1

MMDNASPLSVATLFIATLGVVVVKLVVRVRLFYRSLPGPPHNFFLGHLPAVARVATTLPRAWDW  
TIMTYLHQEMKLGDFFYLDTPWPGPPMVFITSPELAAEIDSAAHYTRHPYVTNIVGPIVGSHSILTAS  
GAPWKFMRSMFNPFGFAHKNLTLLIEDIVEETTFRNKLRLAEQRELFEMEDIATLLTFDVIGRAVL  
DEKFCSQTSANELVVAFRKQLSWLADTNPNVLDKLNFLRPVMNWWYHRKMEIYLRNQLAARK  
PNPDSKKKYVIDLALDITYRRDKKQDSLESGFMKDSNFTDVAIGNMKAFLGGGHDTTSTICYIYYLL  
SKNLAALQVRREEHDTVLGKDLDKIAELLKSQPHLLEQLPYTTAVIKEVLRLYPIGGSGKMGADNIV  
LTRDGKSYPTTGMLLVTLNPAMSRRPDIYDNPEVFNPERFLAPSSVGKESWRPFGRGAMRCIGQEL  
AMMEMRIVMVMTLRNFVDVADAYEEDRMKGKNTNTIKEAFGDRAVYQIGRVIGKANLGMPPMRVAK  
RDISA\*

>CYP5792B1|99987|Umbpus1

MPHLCSPPRSVQTAILQSPTGTLTIASAPTPSPSPTQVLVRTHAVALNPTDHKMPQLHPSPGALTGC  
DFAGAILSLGASVGALRPDLQIGDRLLRLAGYTPLATCSPASAAALVRDYGASHTFAYTSPSCADDIR  
AAVAAPLRYALDCITDAESARTCYAALGRTGGRYVSLEACRSEWKTRKAVKGEFVMGYEIFGKEV  
ALGGEYGRRADEGKKERAVKWCREVQGLVKEGKIRSHPATIAQLSPQQWLSYGAVITISYAISRCIY  
LLYFHLAKFPKPKVAASVNLWYAYHWFSGRYPWTIEKVLEQYGDVVRIAPNEVVFMRPQAAVDI  
LMSGTKQRPRTFIKTDQFHIGGEHAGIAADPDVEKHRAVRKMLAPAFNPRALKEQEPALHEHIDRFI  
RQLEKLGTGEQGVDMREWFWDWLACDIAGDMGYGHNFNNVRDSKCNPWTAVPSVCQCIAAKAH  
LFLRTRFGIGLWGTLNQVMKRFLFYPLVFLVLPKLAATLPTLLKANLTIVRDRITNRHSLKHPDYF  
SLLIQDNEPVPSEGLVAQANHLIVGGFDPDTNLFTA AVHFLTNPEKMEKLNREIRTTFASYEDIR  
NDALQSLPYLHAVIEETLRLHTNGAFGLPRISPGDTPVDGHYIPAGCVVQTA AFATTHSARYFHHPR  
SFHPERWLPAEHA EYDPVFNADVKS AFKPF SMGPRGCVGQNMGYMQARILFAKMVYRFDWELV  
DRGVDWERDLRLYAIWEKPPVVVRYRVVGTAKE\*

>CYP5128B7|100047|Umbpus1

MGDETTTVHRLHKAYGPVVRVAPNDVDISDGEAIAPIYVDKGGFAKSACYVNYDIDGHASIFSTLS  
SAYRAPRAKAVVGIFSTASIRSGSDRIYECVDKFVSRLQAEASTGRPVNVLNLSRAVAIDAVSSFLFH  
KSYYGIEEKSSQLSVSPFVDAFVAVGRFFYLPNGVLLLLLEWFIATFMPDKHVNESFIAVDGFISQLVDS  
AAKDTETYPGRLLDRGISKETIAQCKDVIFAGTDANGLNLATICWYLSWHSERYAILRKEIMENQA  
TQADIQTLPYLKGVIKEGLRLAMANPSRHRPVVPESGWNFRGFHFPAGTNVGVA AFEPHQDPNSF  
PNPERFLPERWLNPTPEMQRDWVPFGNGPRACIARNLATAELFMAVEKLVQADVLKGARPVKDR  
IEIYEFWFSKVKDGRIELVWPAGVE\*

>CYP6001A26|100363|Umbpus1

MAEKDSLPNAPQEHTSTDQEIEDFFASISGVKAASRPLPTQTGDGTYTTPSTNGVFDDILHTRFKD  
WKTLLDAGLSEMTGGPVNDKTYLMERIVQCASSRKSNSKIGTHLSQFIDTLWDDLPHPPMSYLG  
QYAYREADGSNNNYLFPKLGAANTPYAKNVRPQTLMPANLPEAGVLFDVTVMRKRKFKPHPNEISS  
MLFYLASIIHDLFRTSHEDSNISKTSSYLDLAPLYGSNQHDQNLMTLKGKIKADCFSEKRLLGFP  
PGVGVLLIMFNRFHNYVVEQLALINEAGRFTKPKKEGLPDEQTKKAWAKYDNDLDFQTGRLITCGLY  
VNVILKDYVRTILGLTDPKKPWDLPRIQVKKKGAAQGTGNQVSAEFNLIYRWHA AISERDDKWT  
NEAYS DMFPGKDPKTLTPELLQGLGKWEQGLPEDPQQRPF AKLHRGPDNTLDDAALVEILTASV  
KDVAGSFGANNVPEILRAVEILGIKQGRSWNLATLNELRSFFNLAKHETFESINSDKDVVEQLKHL  
DTPDHVELYPGVVIEEAKQPMIGSGLCASFTTARAILSDATALVRGDRFYTIDYTPKNLTSWGYNEA  
SSDTAVDGGHVLYKLFLRAFPNYFQPNVSYAHFPFHTPSKNQEILTKLEIDNEYNFDPALIPPLVFI  
NSHKAARDILSNQKDFKVTWGTAIKYL MHNDGKEYGSDFMLAGDDPPNAKSRGLMDKALYRDK  
WHDEIQKFYEEITLKLHQN SYKLAGVNQVDIVRDIGNLAQVHFSADVFNFPLKTEEYPTRLFSEQE

LYLIMAVVFICIFFDADPAKSFPLRQAARNVTKKLGETIEAMVGPMAPAHISGFFASRFHKHSPLSQ  
YGMHMOVQELLKSGLVKDVVWSQILPTAGGMVANQAQLFAQTLDDYYLSEEAEPHLKEINRLAKL  
DTPEADETILRYFLEGRMRATVGLYRDVANAIPEDGSKTLNLKPGQRMVNCIAASMDPDAPFE  
PEKVDLKRPLDSYIHYGMGPHSCLGYEASKVAMMTMLKTVGKLDRLRRAPGKQGEMKKVINGF  
TMYMTADHSSYFPFPTTMKVQWDGELPPLKN\*

>CYP5328J1|100378|Umbpus1

MGDIWMQITPANNWYIVANPEAVVEIFNRRHEFRRLQLYGMULDIFGANVATTEGSAWQIQRKIT  
ATPFNEYNNNRVWVESLRQSKDMLQWWLSHHTSGVRSTAKDTRALSLNILAYVGFGRSYPFHGAF  
SMSETSYAVSFRDLSVVLNALLTLAIPPSILRLPIFPKSWSRVGWAIKTLKEHMMTWFLDEQSRFS  
QGKRGTTLMSSMVDASETITRDPAAHTSPKHESGQLQHRKEGIVDEIFGNIFVYYFAGHDTTASVF  
TYAVLLLAANPECQDWIAEELQHVLPTEDNEAWGYESKFPRLKRCLAVLLETIRLYDPIPLPKWT  
GGERLLQVGDQSLVIPRTMVLPSLMALHTLPRYWGEDSLVWRPSRWIIPAAASLETEGPVDLGTQL  
EKESILVPVKGTYPWSEGQRNCPGKKFAQVEFVAVMANLFRDHCAQPIPMLGESQDHARQRLFD  
VVNDSQLRLLLQVRDPSSVPISWARRQTAGLDYCRDTE\*

>CYP59W1|100377|Umbpus1

MSKPILHVNGRVLLNTLLFLLFSAIATFIFRLSQIRRKMKKLDQGLSITPYHSVFGSLLVTNDVVSQ  
PADVNPQYYPHEIRRAHPKLGSIYYLDNWPYIAPILVVASPTTSQATQEHSLPKFPALANFMRGIA  
GTRDLVSMEGQMWKTRWGMFNPFGSGSLTSLMPEFVKEVTIFCDILREQADEGGMFPMKNVTD  
NLTIIDIGKIVLSTNFGAQRKYVPMVAALRRQVPWLSFGTELNLWQRWHPRLPLMYWYNQRMN  
KYVNKEVDARFAQQKAKIDGSKSITDLALKSYLQSDTQDANASTADSIDPTFKILLIGQIKLFLFSGH  
DTTSASICYVFHLLSQHESALQKLDEHDAIFTTDLAAASLLSESPHLINQLPYTLAVIKETVRLFPV  
ASSTRAGQPGFSIVSEDGTSYPTDGCLVWSIAQAIQRDPTYWSPDDFIPERWLAAPGDPLYPVKGA  
WRPFYEGPRNCIGQELAMLEMKVAIVMTAREFDIKTVYDEWDRLHRPKGPKTVSGERAYQAKSGG  
PSDGLPCRKVVAVRAN\*

>CYP617AD1|100379|Umbpus1

MANTSEYAVTAVLSLAAVAGFVLLRCQATKHDPREPPLIPQPVFWIGHLLGLIRKGSRYYANVSA  
RYPLPIYTLKVPKSKLYVNSPELVAAVERNSKTISFAPYVLQFAKRVVLPSPREAEDALSQNLNGEAG  
KWGCRIETHSAMHEAMAPGDGLDHMSSTMLHSLFGLLDSKTASTGPRRFNLFMWIRHIVTLATTN  
AAYGPSNPFDPAMEDAIWTLNDKFLFIANVYPQLTAWKAHRAREKLFGRGRDYFAVKGHEHGS  
RLIQGRYEVNKKYVSVEDIGRFEVSVSIALLVNTAPTAFWTITSYSDPLLLTSLRDKLSAFVSASPSV  
TPNKTVYRLDITEVIRGCPLLVSQVQLRMQSTNAAGRMVLEDTLTDGRYLLRKGSTVLIPAAQLH  
NDGSIWGESVGEFKPSRFIKQAGRHRERTRIPASAFRAFGGGTALCPGRFFATTEILSLVAMLVLRDI  
APVGGKWNVPKGRSHIITSVLSPEQDVEVTTEREGYEHVVWDFVLTESVSRPEPL\*

>CYP5077C3|100420|Umbpus1

MATFPAITIFDKLWAPSLALTLSLAIFSLGRIWIKQSHISGPILASISNFPRLSWAYSSKAHIVHIKLHEQ  
HGDVLRIGPNCISVGDPREISKIYGIAANFKKSDFYKVLQPMKSGHVIQGLFNTQDDNLHRAMKKPI  
AGIYSMSNLIEFEPYVDSTIAFFFKRLEEVSQSKSRQSCDLGTWLQWFAFDVMGEITFSRRLGFLDEAK  
DVDGIMASIWKLFQYSSWVGQMSWLDKVVTKNTFLSRMLPAKTSPVVAFAVARARERTEKTGDE  
EKSAILQNSRDFMSRFIEARAKDPSIPEWFLTAWATSNVLGASDTTAIMLRAIYFLITNPGSLKKLM  
AELAQAQHQNRLSDIVTWKESRSLDYLDACVKEAGRLHPAIGLTMERVFVGHGRTICIGKNISYLEIF  
KLIPTMFARYDMELADPTREWDLSNHVLVVQTGLEVKLRQRQAYQNGTSLGHR\*

>CYP577A28|100791|Umbpus1

MKCNDVQTISIAIPSWFAALVIAAISFTAYQFLYVPLVLSPLNRIPGPKSFAITRWRLMYEDWKGT  
TKIHLHLQYGSVVRVSPNEVSFNSLAALRTIYGAGSRFERTEFYRMFDVYGRQNLFSSSIKHAAR  
KKLLTNAYSKSRILKHTATAVQDKTRQYLQLELDPDTASEIFTSLHYFSFDVITNFLYGNNDYGGTS  
ALTGSAADRALLQDMVDPARRVLSWWAVHFPRYTKWLYTRTGLMDRVLTRAGVLPMRKPTVYS  
GIRAHALDAWVSFKDAAIKESNTSAQDSILGMLWKHHESQKEDGLEDMDIASECADQLLAGIDTT  
SHTLMFLIWALSLPENRAYQEKLISEVSMIDASLLDRNGIPSVQATDTLPYLGALLKETRLRYVTLP  
SEPRSLPVDSVIDGYHIPARVIVGISPYCLHQNAQVFHEPLRFNPERWFGPASDVEEMKRWFWAFSS  
GGRMCIGLHLAMAEMTTLMMAAVYRNYSTTIKPGYEGVSPGVTSRFEVFFDETFFKQIESSTLRLAK  
DHKSLHADLPPNLFSPSSASESVPDDLTRLTILLAGPQGTPYSRGVWKLQIKIPDDYPRSPPKAAFR

RIWHPNVEESTGSCVETLKRWDPKLTLRDVLITISCLLIQPNPDSALNSAAGQLLQEDYEAYARQ  
AKLMTSIHAMIPTELRDVAVEAKKRGEAGTEIREDEEQELKTTRHAFSSSLNSRQKLLIPFISMFA\*

>CYP53A62|100904|Umbpus1

MFLSFFFNPYTLTLLPLLYLLPYIRNWAIRDIPAPFPAAFTNLWLLYQCRRGRRYLAVDNAHKKYG  
TLVRIQPDHVSADADAIPHIYGHGNGFLKSHYYDAFVSIQRGLFNTRDRAEHTRKRKTISHTFSTKSI  
GQFEQYMHYNLQELVKQWDRLSSTASSAGQEYAAIDSLHWFNYLAFDIIIGDLAFGAPFGMLPKGK  
DIAEVRKTPSSPPTYASAIEVLNRRGEVSGTLGCLPTLKPYAKYLPDRFFRDGLEAVENLAGIAVARV  
NERLRQTEEGQGANQRVDLLARLMGRDEKGNKLGQQELTAEALTQLIAGSDTTSNTSCALFFWV  
LKTPGVMEMLQRELDGAIPAVTIPHYEMVKDLPYLDHVISETLRIHSTSSLGLPRLVPPGPGITLSN  
HHFPAGTVLSVPAYTIHHSPIWNPPHSPLSGPEFHPDVFNPDRWDEALLTEKQKIAFIPFSYGPRAC  
VGRNVAEMELALIVATVARRYAFELREAELRTREGFLRKPVRCRVGMRRRR\*

>CYP5076M1|100984|Umbpus1

MVSWLSNGLLAAAGIATHLGYFNRGEHHLSTIYLQIFFAVFATALAFVHVDGEPLAQAIKVAS  
SAGFYLGGLYTSLLVYRTVFHPLNKFPGPFGRISNLWFSLQLGNGDGHKKLLKHEKYGDFLRTGS  
SDLSIANPNIAIVVYGTSKCTRAAWYDNLVPMVSLQTVRQKNVHSRRRLWSTAFSDKALRGYE  
TRIMGYQDRLLAQLATIGRQPVNVTKWFNLYSFDIMGDLAFAFSNMLESTEEHFVAVKVLDKGLEP  
VGWMLPTWMFRLLVAIPLANDFVRVVKYCNQRLDERMKMTVNTPDVMTLLGPWKEKTPTGT  
GLSDLQGDQCQLIIVAGSDTTSATLTHLFYELAKNPDHVLKLRDELASHRASGSDLSHQIKNLDHL  
NAVINETLRLYPVAPMGLARLTPPEGIEIEETYIPGNMTVSCPQYVIGRSENIYADAKAFVPERWYSK  
PEMIKDKSAFAPFSTGTYDCIGKQLALLSLRTVIAKLIMDFDVSFAPGDNGEYFAKNTTQHFTWGLA  
ELNLVLTKR\*

>CYP52K10|101154|Umbpus1

MELFLFHFRTQGYTLEQVFLGTPAFGTVDPANLEAILSTNLKEWGMGLRRAITFPM LGDGIFTQEG  
APWKHSREMLRPHFQHRQYDDLEVFRESVDNLIDSIKGGVIDLQPLFFRLTLDTTAFLFGESVNSL  
KAPKTVGEQNFTSAFNATAQEYVAKRFRLGLYWFIGGKKFQEACDNVHRFADQIIDCNLGRGSKD  
EESFLDNVAKNTPNRDALRGQIINILTAGRDTTACLLSWTFFMLVRHPNVLGKLRTEISSVSQGRGS  
ELNRTDLRNMKYLQNVLKEILRLYSPVNSRTALKTTVLPTGGGPDRRSPVLIPKGS AVAYSVYTM  
HRRPDLYGMDAELFRPERWDEDMPLNQNETNAKWGYLPFNGGPRVCLGMDFALTEAAYTVVRL  
IQRYPTIKLPEGMPVELVGVERQTM TLVSVVTGGCKIELGGEDPIVDVVA VHGLNGDAFKTWTTNK  
TKKFWLGDSNMLPAHMKRSRILTFSYNAAVTALFGKTSSDRIMQHAHTLV AELVADRELENA AER  
PIIFICYSLGGIIVKRALAYSASRTSKLVQHLHSIFVSTYAVLFLGTPHAGSSKASLASTGRKIIDALVPS  
KIWDTEGQLLDALQEGSETLQNITDMFAPLMKNFRIYFFWEQEKTDLGTSKDYVVEESSAAPILDDT  
ERAGLPYDHRTMCKFESNRSPGYRVIVAAMIRYSKGAPDVIAPRWVAVKEMLKAKRMNEAAELM  
Q\*

>CYP540G3|101281|Umbpus1

MLKEFFIGSPSTGRCVQINVSA AETLQELRSGIANAFSILPKDSISFENTQRQLSTLESVIKSNEPVQVR  
VDEHHVREPLGPKALPLVGNHYELYPDHVGNHERLFARYGPVIKTVNMGTIYLTNDPNVSRYVL  
SETEYFTKTTTDPQHPLHYMRDNTALFTCDSDAPVFKVAHKFVPPSMSPKAVRHYSPIMQEAVERS  
FKA FDELDRQDLAFNCYQYMFKLAGQIIYKMVLGMSLDHFENINSPPEIIRLLGEYLILMKKVSRLR  
PQWYSYLPFGPPKRLAWVKDRIWKLVDQAIEQRPRAPDGDQDLPLHDAALKATCVADYLCRAID  
EKGQKLSHEYMLSN CVVLVGAGFITSASLLSWLIYALVKYPGNQERLLQELVDHGATADTKWRYD  
TIQSMKFLDKFVKEVQRVHNPSFQTARNAKKDVVLPGGYLLPKGAVIIPTFPSLHMNEAYWDNPN  
KFDPRWDSDAVKQRHKMVYTPFATGPRGCIGFNVALQEAKLTLANLVYRYHWEDASTEPMVY  
DPEFLVMRPLNFYARAVQRTTWPQKSHE\*

>CYP65AU4|101283|Umbpus1

MTVNDATTIPIITSPQHLLVIGVFAFLSWYLCSAIYTAYFDSL SKYPGPKLWATSRI PSQRSVVSGHHH  
HDMLALHKQYGN TVRVGPNELAFFSPEGFKDIYTKRAGHKLPPKDRSHYPLPPNGVDNIVTANDE  
AYHARHRRL LGYAFSEKALKEQEPILQGYVDL FVARLRDQAARGPVDIKSFFNFVIFDITGDLMFGE  
SFGCLEESKLHPWVELFFSAAKAYSYLIAVSQFPWVKSILEPLIPRKVVQEGLDHFKLTAEKVDKRLA  
MKTERPDIISFALRNGMREGHLLASESEKTMSRAEMHSNAYVMIAAGSEEPATHLSGCMYLLV  
HPQSLNRLTHEIRTTFASETDITMSAVANLPFLAAVIEESFRIYSPFVTSLTRVVPKGGDTIAGEYVPEG

TIVAAHLYASFHSPNNFASPESFLPERWLGTDA RFKNDRRDVLHPASLGPRGCIGKALGYAEIRLVL  
SKLLWNFDLELCDESRNWVHQEVYIIWDKPALMVRLRDRRVAGKGY\*

>CYP6308C1|101476|Umbpus1

MDYSTLPNDPDHPAGSSPWQSSPQPTSRQSFTTPRVQASTSPTPGQSPYNTYDQRRSQDDVSDQDTS  
TPRNENYGGAEYPGYMSAPAENGNSSSYSERLQGPPSTEQGYSGQQYQQQQQQYQRQPQSQQQ  
RPVGP HRYHSAGRPAQRQNIPQYKLQAKITGLERTGRKDPILRFDVHTNLPKFRTTQFRDVRRTHSE  
FIKLADHLISSNPEALVPAVPPPLTAAGAGTDEDEARVKGSMQRWLN YVCGNDVLMRDDDEMVF  
VESDFGYSPVVRMKQPATGVRRRVLKQFAPPPDDTPELHEARPVVKLFYLGTMETGQKVDRVKA  
RRGLGLAESDLGVKLGSMHVQEIH LGLANAYRKLGKTIQTTG DYHAAQGTAEATTLADPLNYHSS  
DAFIVKETLTNRHILLRELIQAQQATRSKLSAADRLKASSVRREKVD E AISALDEARSHEL YLSQKT  
QRVTSNLLQEKRWFARTSADLRSSIREYVLREIEAERRTLATLESVRPDIRAIDSSGGLSRLGRESHP  
AARRASMAASQGPRGDAWSGVPRRPDGLSRISGSFVAPVGE GEGEGEESVGRGRAVSGGTLKSL  
KEEDDDDRVDAKNAAISPSSPAVTKQLYGYQAASFLNPALYTHFQLGDYPGLFECRDRALHRRLR  
RLVGRTFTTTATTAAERVVAAQIGKFLAWVDEGARAETPRPFDVDFGLCMLNLDIVGALFLGAEF  
ALATRVTPLLRDLDFVEPFVTLKVPFVAPLTSWVLVALWRRFWGSSCRMHEYTLAAFRGYVSR  
KGRGVDAAEEGMEQAELLGKLFEGKAAGGAEP LSADAIAAVNGSIIEGGTDTASNVLTFTMWELS  
RWAGWQARLRREFEEEGVVFEGGLAAYEAVRGLEVLEAAVREGLRMFP AVVGGLPRVVPEGGRE  
VERVWLPGGTIVSMEAYTLHHNPDVFPFPHEFDPGRWLRADTDLANMRESFFAWSSGSRACMVSP  
PLLERRVAKHRSRLSMRPLPRPLPLGPLWLGLSKGPKPNFDMTVERYIGGFEPGDYGRV\*

>CYP611B5|101558|Umbpus1

MDGVSQAMLLVALAVGVGTYLMLVRILGAKQDPQEPLIPATIPYIGHVIGFMRSKSNYYVQLSHQ  
SVLPIFTMTMPGTKMYVVTPELIQAIQKQPKELAFPPIEAKFASKVCGSSAEAHKIMMTNVNGDEG  
DWGLSMETYAAMRAALAPGPDLDNMNRVMIQNI AAALDHLTAAGGKHAKIGLAKWLRSSVTA  
ATTNSVYGPQNPFKQQA VEDGFWD FENDLVAILIGVLPSITARKGVAGRAKVTQAFERYFRTGGH  
KESSILMQNRYETGAKNGLSIEDIARFEVGGAIAILVNTAPAAFWTLLYVYSHPGILEDIRNEVSSIMT  
TTVDETGNPIWNLDITNVKTKCPVLTSTFQEVLRHRSMGTSIRQVMQD TLLKDQWLLKKGCMIQM  
PSRVIHKDSSIWGSVDVDEFNPRRFMKGEVPKTENGKPPNPAAFRAFGGGTTLCPGRHFATTEILAVV  
TMFVMRYNMEPTAGAWSLPKTDNTNVA AVVMEPDS DVEVEVSTREGFEGGQWTFSLRNSGMIFA  
VVAEDI\*

>CYP548AJ4|101628|Umbpus1

MLDLQRLTTTLWRGLLIALSCLALRLLAIWIYRLTFHPLAKYPGPWLAKVSDLYGAYHNARGQLHI  
ETEKGHRRWGPLIRQGPDKLVFNSATALHDVYSSNEVQKSYGYTTMIPAPGAYNIFTAVDKGIH KH  
KRKVLSQGFSDQCVRAFEPKILDHIDIFLAKLVGSPERGSGDGEWSTPANMTDRCRHLGYDIMGEF  
GFGQS FELQLKDDNRFLIEAVTATTNKAGVYVQYPALANL KLEKLLYQRGLGMREKYLQLMSDLV  
RSRISKEKDAKNDLLYFLADAKDPETGLGFTEDIWAESRFLLIAGADTTSTALT TAFFYLSAYPACY  
EKLAYEIRNTFSSGSEIRSGPKLAQCQYLRACIDESLRMSPPISGTLWREVCAGGHVIDNEYVPAGYD  
VGVPNYAVHHNEDCFPDSFTFKPERWIPSADNSEKDIERARRAFSVYSIGSRACAGRNMAYTELGD  
SIARTMWYSDFRRPEGPLGVVGAGAEGSREGRHRVKEFQLMEHLTCSHDGPFLQFCGRKGLTDEL  
HDRRAPPASY\*

>CYP6456B2|101820|Umbpus1

MDGPFSAITILVLA AIIGLWYILDYLYAPRHSSGEPPVLPSSVPYVGHIIGLLRHGTRY YQTTS AKCKH  
PIYTLNMLNGKVYIVTSPDLVSAVNRSKSLAFNPFI AQLGKRITGHDDATSQIVQHNLNGEQGSG  
YVIEVHDGLVAALSPGAHLESMIAPMLQKASTYIDDLDCSNEVDLFAWMRRMVTMCSTTAIYGPD  
NPF AKNSDYTDFFWDFDHDNLNLIIDVFPTLTAPKGS RARSILGTEFQQYFENYKPGQTQSSAMIQA  
RHAANTKHGVS LWNQGRLEV GTLLGILANTIPSAFYMLVHIYSDPSLLKDIRAELETTAVSTAPPDA  
KRTL CILTRDKCHLLHSTFQEMLRVHAHGAGSRFVREDTILDDQYLLKKGMVIQMPMAVMHSDP  
SIWGPDVASFQPRRFLKPNEASKGLKANSPAYRPF GGGASMCPGRHFVALEVLALTACMVLRFDI  
MPVVGEWSVPPQRQESLATNVFPPEKDVVRVKVTRRAGFEAVVWDFAMK\*

>CYP682AV1|102249|Umbpus1

MSLLASFQLYWIVILGA AVL FYLIGRTFYRLHFSPLAKFP GPKLAALTLWYEGYYDIVKRGQYTFEIG  
RMHEKYGP IVRISPFELHINDPEYYDELYNGVSKKRD KYPWALKIFGAPDAAIATTRHDHHLRRG



AMNQFFSKASVRRVEPIIQKNLEKLLIRLRGFQHSCKPIALNTAFTAFTSDVITEYSFGRSYNYLDQED  
FNLAFSELMGLGVHKMTGILKHVPGIPLMEALPNRLVTRLNPARN AFLDLQSNIAQIKDIKDRGSS  
DCEKASLSIFEALTQSNLPDGEKTVKRLSAEGQVLVIAGTETTAWTLSVITFYLLSNPPMLRRLRDEL  
DQVAAESSEPATCTRLEKLPYLTAIIEGLRLSYGVSTRLQRVSPDKVMKFFDGKHDWEIPPGTPVG  
MTSTLIHQNPITFSPHEFCPERWLENPRLDRYLVFSKGSRQCLGMNLAYTELYLCLACIFSEYGLN  
DQKSPGGEMALYETTKEDVEIQFDQFVAIPKADTKGVRVLIT\*

>CYP59X3|102303|Umbpus1

MAKLPLDCHPHYLPQVMRAMPELGPIFYFDWPMADPMLFVASAAGAYQITQEYSLPKFRVMR  
DFIDPLAGEYNLVTMEGDMWKRWRSIFNPGFSSSHLMTLIPDILEDLTFCGILRQHVQKDDMFSL  
ELTISLTVDVIGRVTLDTRFNQQRSKHDMMEALRSQVRWLPARTILNPLSPVTVLRPLVYWYNTRR  
MNDFISRELDTRLATHQNGHVVDKAKRSKSVIDLALQRYMAEKPADKAIGMDAIFKTVAMCQIK  
LFVFAGHDTTASTICWLYHLLSKNPPALSRLRAEHDSIFGTDLAQTASLIASNPHELLNQLPYTLAVIK  
ETRLRYPPASSTRNGEPGFSTDPGRHFPTHGFLVWSVHQATHREPSQWPQPDFTLPERWLVA  
PGDPLYPIKGAWRPFEFGPRNCIGQELALLEVRIVLALTVREFDVRAAYEWDRLNPGKGGRVNGERA  
YQVLMGSAHPQGGFPCRIMAER\*

>CYP5077A4|102583|Umbpus1

MVTFPLFASERSYLP LSLALLALSSLLALYYIRTYAKLRHIPGPFLASLSNLSRRSWVL TGNSHAIHVNL  
HRRYGKVVFRFPNNVSVSDPSAIEVYGF GAKFPKSEFYDAIMPYVRGKSIPDVFA TRDET VHRMTKR  
PIANIYSMSNLMSFEPYVDSTMRYFFERLEELFVDQGA FDFGHWLHLFAFDMGELTFSKRLGFLE  
NGGDIDGLLANNWNYFRQAAPATQMPWLD FLWKRNP LPHWTKVNLIVAFGVARIKERQGRSE  
KDTADVNNRDFLSRFMEAKSRDAQIPSEALITWTNSNIQAGSDTTAILLSAIFYQLLKHPESMRHLQ  
SELDIAAKQGQLSEFVTWKESRNL PYLDACVKEASRLHPPIAFPLERVTPAEGAVICGQH IAGETLIA  
MNPWVVRNDRKDTFGVDAHSWRPERWLCDEDEGKRKMYNNLLTFGAGHRACL GKNISYLEIYKVV  
PTMLHNHVLINRKQQGALPIESPSTPNQVELQEDSSEDGDEDEDEDEDEDEDRQQHDFL NELGFE  
DFLGTASNGNSSANVPPTYTPQEIPAVPDEQGA VFNILSLDHQQHHYNLFSIPQDNDFPFSTPSTEF  
WEDRSMITSQGGTGNASDATATPESFNQSQVCLGPEQGH LARGESTSGSTLILEDVQPETVSLITL  
SNSRAKFRMRLESKEN\*

>CYP51199B1|102865|Umbpus1

MERLWDKTSTNPVAVL LLLALTICVTRILTGLAGPKYLNGEGLRSVGMLPYWIPFLGHLFSFIA  
KFEEFLQQTSYRASHGIFSVNLAGSVHNVIYTPSLIQNIFQQRAPIVNSEAINWYIMVNVFGADRRYK  
KDYFLAFEGLIAAVRNNLLREPSLSIAVDATVKAMQEEIPNLVSFCQSPVDQNLWERTSSPITCANG  
SEAMGSSVIVEVSLFPLIRNFVGHISMPSLMGEAFMEYYPTVLDDMWALDEGFNYLAIGLPRWFPVR  
SVTKAHLARARLNAALAEIHTALDTLAAGGEPGP EWRLSDVSRVMLERNAAWRSHCIRPNERG  
PGDLGILWAMHANANNLVFWILVRMWATPGLVERVREEIEPFVQISQPMQTFGIHEAPRMKIGLA  
GLLKECPLLKSCYLETLRLDSRPASVKKIERDFIVRETRQDVRAGAQPESYLLKAGTYINIPHAVHQL  
DPRFFEDPTVFKPGRFLVRKGQDGQKQRPRRQQEQQEMTAQVGTLKPWGGGASMCKGRMFAER  
EVLAFVAGILVMWDLEPVT PRGWVVAHRKTTGVA VPSTDVVRVRLRRRHRSSMI\*

>CYP5282B8|102882|Umbpus1

MDFTSNTTSTNLLSGMDLNSHDFQLAGFIATCISFLAYLSYSPRVDDKKSPAFTSDTVLFVGSWRFFTH  
KLMFWMNSMAKSKTGNFSFWLGKNHIVGVSGEAARKMYLDNRDLDLIKGITLIGHGPDFIPGRAT  
VVHDIWKPTFPNGRSYSQRRLLDLQSEQLAKRLPRVTTDARA AFEAMAKNP SGVTNPAKACYRI  
VVTQASRVVCTDEISDDPKLLESLLGYLPILQSTSSLHLLAFPWMSYVSISYWKRRYGRYGLSSTVTPI  
VNKRMMKKGSPRVDDALQTLIDNGDSKDYIINFFISMLFIAGANAGVLSGAMLNIVAHHPDWQEKI  
YGEIKAAAKAHSTNKDAPLVEQLDSIPLEAWESSFPSIDL CYKEAIRMWVAFPMGR LNDTPNPIPIP  
GTDEVIPPGSFACYNTIDVHYNEELYPNPMKWDPERFREGREEFKKQTYGYMGWGQGRHPCVGM  
RWAKLQQNIILAYALAMFKWSGCDANGQPNPHFAQPTTALNELAPSLPQGLYCKYVPREKM\*

>CYP61A1|102924|Umbpus1

MAAVANGSFRSLAANADYPSAMKVEHAGMLSHVYHGINGWSIALTLFLILVYDQFKYVWNKGT  
IAGPAWKLPFIGPFLESVNP KMEEYKAKWASGELSCVSVFHKFVVIASSRDMARKVFNSPMYVKPC  
VVDVAYKLLRPTNWVFLDGRAHV DYRKGLNGLFTRQALETYLPQGEQVYEKYFAKFLDISQKQN  
NGKAVPFMPQFREL MCAVSCRTFVGHYMPDEAIKKIADDFYNITAALELVNFPIIPFTKTWYGKKA

ADMVLDEFKCAAKSKVRIAAGGHVTCILDGWVSSMYQSELYREKVEKGVAVDGSEKPAMLIHQF  
SDFEISQTLFTFLFASQDATSSAATWLFQLMADRPELLDRREENVAVRNGDRNVRFMSMDILEKMTF  
TRAVVKETLRYRPPVIMVPYVVKKDFPVTDSTYTPVKGSIMVPSVYPALHDPEVYPDPDSFNPDRWIT  
GDAEQASKNWLVFGTGPHYCLGQTYAQMNLMAMIGKASMFLDWHHQVTPLSEDIKVFATIFPQ  
DDCHLAFSERP\*

>CYP527W1|103024|Umbpus1

MAAEMAFPLAGPERASTGLRLSAIVVACAIAALVVSAVISAVRSYRRLQDFKGP TLACFSDLWIFKA  
TLLGNLNQQTS AVLKQYGPLARIGPNHLVTEDVDLLRHMSAARSVYTRSDWYDGMKLDPNINNV  
ISERNQDRHTALRAKMAAGYSGKENPGLEKSIDDRVQDLVNLIGRKYISTGTTLRTLDFAQVAQYF  
TMDVLTDVAFGAPFGYLN RDEDVHDYIKTIRSFMPVLELKTNHPVVNALMGSR LVKALLAPT AHD  
RTGMGKVMGVAKQAVQARYGPKKIQRDDMLGSFVRHGLTQQEAESESLQIMAGADSTATAVRC  
IFLHLLTNPRVYSRLAEILSAHRAGSISSPIRDAEAKQLPYLQACIKEGLRIWPPLTGLMTKRTPPAG  
DTFKDVFIPGNTDVSYSAWATHHNTRTFGEDAAVFRPERWLEARGEAAQRMERSVELVFGSGRYG  
CLGKNVAFVELNKVFVELIRRFDFSLVNIAPMKTRCNGIFLQWDMFVRVTELDVYGG\*

>CYP530A43|103132|Umbpus1

MPLSLLVVIAGALALAVGTVKLLRVGRRPAGYPPGPPTLPILGNLHLMPSRDPHLQFQKWAQEYGP  
VYSLILGTKTLIVLSSDKAVKDLLDKRSDIYSDRPDAYIAQDLIGGGM RVALMKYGPTWRMIRMV  
HNILHVNAAKSYVPYQILENQRM LVNLLDTPDRFFDHIRRYANSLTTQMIYGFRTTDVDDPKLLRIF  
EVCDC TPPECGNAWAKMLMNCQQGVEKVSQAASLGT AALLDVYPILRYLPNICVPIR PYAKALHK  
SEHDLFVGNWMDAKNAIKNGTAKHSFCVNIKAQEVSQFSDSLAGYIGGNLLEAGSETTADTLVGF  
VQAMLVFPDVQQRAQEEIDRVVGPDLPTMADEPNLPYIRACVKETLRWMP TVPLGIPHAVIRDD  
AYMGYTIPKGAGVALNIWAIHMDPARHPSRPTFSPLRYIHDVQTAAAAALNPDP AARDHF GFGA  
GRRICPGMHIAERSLFIGIARMLWAFS MERATDREGRQVVPDIERFTQGLAMMPEPFEARFRVRGK  
GREEVVRREWREASGGLDERGQWRVVPKG MALGWGARD\*

>CYP544C2|103307|Umbpus1

MLTIVICCIVAVALWFLQGQSRDIRRHGKRLPRPPGTLPFAGNGIWFLQPRHKLLDWFTECQDKVG  
FDTFEISVPSLP PGIVINDPQNV EHV LKNNDLFIKGAFFRQRSWDLFGNGIINADGELWRIQRKAGL  
RFFSNANLKAFIDEMLP PFLDDTKQALRETA KQGA AVDLQNVFHELTTRL MGKMAYDMDMHGS  
LPFSKA FDFASGAIGERFQNPFWKLKELFLGAPLRKAVSEVKS YGDAIVSAAVQKKKH EGNESRITA  
FDLLRTNLINSLLDNIEDHQV VADAAMNYLSAGRDTTAQSLSWTL YLLMRHPGAITGIREELQASF  
PNADQTLPLSFDTVQPPFLPYTMAVFNESLR LYPVPVELKECTAPTTFPDGTTLP IGA VVMWAPW  
AMNRSKHIWGDDAEGFRPERWFEDGSDPTKPTLKT KTA FEFPVFNGGPRSC LGKKMAELLAVYVI  
ASLVWEFDFDEV LDEKMGGCGVGKSRVSQNSLTLPMEGGLPCHVRNT\*

>CYP677A7|103344|Umbpus1

MFESIDWVVRPSLSSVLVVAFIVPFFFIQKIIYNLYFHP LAAFP GPRVAGATRFWRAYVECVLNRSFV  
HVLEELHKTYGAVIRVCPNELHFAQPQAYHDIYNNKNRWDKERRLYQSAGADTSSFGFLTYS DAK  
ERQDALRPMFSTKAVKQAQGLIIDKINALSAAFQRLSEAGKPADLFYGYRCLTIDIITYLCFGHSIDAI  
EEPEFRAPLV LAMEPLLEAIRIKHSDTYKAIMTHCPPSLLSKFN PATAGFVDLQQFLQQQIGNLAE  
NPGQISHLPHSMTMYHQLMNEEAYKTKTVPSE RSLYEEGVNFLFAGADTTGNALMLGSYLLKSP  
KAYHTFKQELQELWPVLEQEPNLQDLENLPYLN AVIKESLRMTTG VVTGLLRIVPSGGAKICETYVP  
AGTIVSCSSVFVHYDPNIFSEPNEFRPERWLEQANLDHWLVAFSKGPRMCLGMNLAWAELRLSFG  
YIFRKFDMSLDQSSPDELLWREGFVPKFLGNHVKANMTIL LASAIKLD RGSIAK CQPHLRMASAYT  
PRPSAATGSIPPTLP PSVETAYRNKCIDLKRRMNEVEESNDAYRLRKVRLMRGIRKMRLERAFLLETL  
GKRMRKNGHGLNGTYEDSEGSSGPPTFSHGAVQPADALGRSEDEIRDVAQRQWREMDEEDKRL  
WNGRYEERMRRWQAETEAWRRRRGRAAGRADRDAGDDGDVDMGEGEGRGEGGFTAVNG\*

>CYP5328G1|103368|Umbpus1

MADPRLWSSLLLLPIAWLVWTGYRLASNYAIARRVGIPVVVPINPESPVWMLTSDFLGPYIDHVL S  
WIPFGSGS FTRYAHRGWDVHDRAKS FLELGDAFILVTTGKNWLYVCNAETFSALLQRRSEFSRPLEI  
MAVL DVFGPNLSTACKDWQRHRKATGPPFGEPNMPLVWNECIRQAKEMRDYWKGP DV RHTVN  
DVRRFSLHVLSATGFGKSYFPDRAAAEEVPERGSLTYKESLSLILENAILIMLLGPKLLTGS LQH YLPKH

WSLVGHATSTFKSHIAEIIKEEKCLIDEGKANTGNFIGAMVRASEEAAAAAEEEDHGKTGGRRSNLG  
LTESEIFGNIFVFNFAGHDSIAITLTYVITHLAANPGVQDWIAEEIQHVCRDQEEGATVPYRDAFSL  
KRCTAVVYETLRTSTPFAIVKTTGSTPRTVKVGGKSILLPAGMNIIFTFASIHSHPRYWGDADVWR  
PARWIESTPLPPNAGSDGTGRSVFDSESLFNPPRGSLPWAEGDRVCPGKKFAQVELVGAVSALFAG  
GWRVEPVREGKGESMEAARGRVKDAIKDSGMVLLVEMLHPERVGLRWVNRGKGI\*

>CYP51194A2|103370|Umbpus1

MITAPQDAFAAYKAATVLSFDSFLDEALRAFGVDESSLKLAWHKPSPGDACYRDPNPVNPQKSFI  
HWIRDTYRQALLPGEEMNHMVAHFHSYVESNLQWERVSSFARSPGETKGPIRLSLKDFTTTIMLEAI  
TDSLFGDQLVKVEPNIIKYAAEFSDEVWMLVYRLPKYFAGRVLDKRMKIMNALEKYRQIPQEERTA  
GGEAWPVEMVLKAQDILGMSSESNNAFVTVIHWAANGNTCMLCFWLLSYLLRDPSLLARIRREIA  
PAFQTGTLDLAYLVSSCPLESIFFETLRVSTGAISSRRVTSPTITGGKRLKPGREVLIKHRALHLNEQV  
WGDSAGCFDPERFVKNGALTGHSSYRPFGGGSTYCPGRVIARQEVCFVALALERMEMVLVPGQA  
FPLLDNTRPWIGVTGPMPGMDLYVDVSERRRSVGGGEN\*

>CYP682AZ1|103907|Umbpus1

MRVCSKPIVTAALTLAALGLAAPAISDESPPLFSRQEFCYNAPGTVAGTLLGSRALVAKNPRPYRM  
SKEFVNPQLWCAPHCATYIRATYISAIPGQSWGLVQYLMGDAEADAQKQLRALGDVNIRGGLYVY  
RAYGLDMFIRDSNNHQLTWGVLREALRALTDYFGEIQTALPGSLTFIIYDGPVVRVNPVELHVNDP  
EFYDQIYTGPSKKTDKWAWSAIAFGTPNGIFGTVPHELHRKRRGVLNNFFSKQAVSRLGPNIQALV  
DKLCDRFRKNYETKQPIDLHHIFSALTDDVITEYCFASDDCLGKEDLDAHMTVVWMKLSEVSFTI  
QQFPWLLPIVNALPVWAVRLINPRLYEMVKLDRGWYRQIDNIRVEEKVSDKSTENTIFHKILRSDLD  
PQERTTVRLVEEARTLIGAGTITTANALKVASYHLLANPRALQLLTAELKTAIPDPAHPPSLPQLEQL  
PYLSAVINEGLRFSSLAHRMQRIAPDRPLLFHEWVIPPGTPLSMTSFLVHHDASVFPSPDAFMPERW  
LGRSEKRLDRYLVPFSKGTACLGMNLALAEIYVALANVFRRFELELWETEWERDVRVTHDFVNP  
PSMESPGVRVLVKGVVG\*

>CYP617G18|103931|Umbpus1

MAPWQLSALVSFAASVLLVQLAPQLSISASYVRAFLATFGLQLLIWAVWTVLIYPKLWSPLRHLPH  
TNASFFNGHFKLIASETTGKPPQEWINEIPNDGLIRYALFNRRERLLLNSRALGEVLVQKNYDFIKP  
DQLRQGLGRLLGIGVLLAEGEEHKSQRKNLMPAFAFRHIKDLYPVFWTKSCEMTQAIMSEVSEKSN  
AEQKSSSAAVEVAQWASRATLDIIGLAGMGHDFNAIQNPTELSTTYRKVFQPTREAIQILGMISLFV  
PMWIVRALPVQRNDIAAATSTIRRVCRQLIHQKQEKLDKEERVDIDILSVALESGGFSEENLVDQL  
MTFLAAGHETTATALTWAIYMMCKHPEIQTRLRAEVREYLPSPEDSSSTVTDKVLDKLPYLHAVCS  
EVLRVYSPAPLTLREAAKDTSIIGEFVPKGTRIIIPAAVNLSRELWGDDASKFDPDRWMGPRRTNN  
GGAESAYAFRLFHGRPRSCIGQAFARAFAACLLAATVGRFEMELEDKDFVVEVKGVITARPKDGLR  
VVMRPVEGW\*

>CYP5104B12|104243|Umbpus1

MIALHQRHKGIVRTGPNEVSVSDLGAIKKIYGAGTRFKKSDWYSVWQGHRKFDLFAERDERIHRTQ  
RRLVSHIYSMDSLKDLEKYVDDAVHVFIIKKVEGMQSQSMDMGLWVQLFAFDVIGEVTFSKRFQFM  
DVGQDDGSFAAIEGALQSAAWIGQVPWLYWAHDFLMPVLGNHLGINARHGSLRKFAAQEVANR  
RDRGSDHQDMLDKLLEMQKERPDENMDMAVLSMATSNIFAGSDTTAISTRSHIYYLLKNPGYKRKL  
VEEIDQRKREGKLSTPITLEQTKQMPYLQACMYEALRCHPAVGMSLPRVTPSGGIEIDNRFIPEGTVI  
GVNPWVVHRDSQVYGEDVEAFRPDRWLKDDTGDTERFFFAFGSGARMCLGRNLSWMEMSKLIPT  
LFMHFELELTQPDALWKETCWWFVKQEGVHVIVRPRSSA\*

>CYP5472E1|104470|Umbpus1

MPVLHNLRLPTLIGRLSPSHSILSSLIFTLLGIHLFITWHSARQRLRKHGEKAPAAPSWAPFGIDLLAT  
AVRRLISNDDFTWSRELLSVPGRTVSISMIGQDLLMTDAPENIKAVLSTHFSDWAKGETFHTIWEDL  
MLDSIFASDGALWHANKDMLRTFISKLRSTDYDVTEKHISQLFQNLLEDGESYDFFDQIDRSLDVVT  
DVFFGESAGTLTSEKQPVREAVEDMYVWNTKRVLLGNLGPFLPGSPKASGVMHSYLDREVDRVIDKARA  
TNEESDPDEKSRREDSMLGSLLRQGLSRKLIKDALMLAIMLGKDPSSITLVWVIYELARQPEILVKLR  
EEIAHTVGFAPLPTPGQLKQMPLLQNIKETLRLHPPVGYNIRVAAKDTSLPTGGGLDGTKPVGVLK  
GTHIITSNLGVQRLHSSPAPPSLPDIFAPSRWQSWTPDLWTYLPFNHGNRVCLGRNFAMMQMEY  
FLCRIFQEFESVQLMDEEMDRKCLYKVKGVGDGREERGEMKIKMALNTPAGAVMVKFVKTKGRQ\*

>CYP6003F1|104516|Umbpus1

MAAEDSASRKVSQGLISNLLLCHANIIHDIFRSNSDDKNISDTSSYLDLAPLYGRDRTHQLEVQKLE  
KGLLKPDFAENRLLSQPPGVCYILVMYNRFHNYVAEQLLLINENGKFSLPPESDYYRDLSPEDRT  
KAEEAAKEKQDEDLFQTARLITCGLFINVSIHDYLVKVMRLHLKDTSWTLDLRIEMPGDDNKEGVQ  
RGIGNQVSVEFNVLYRFHSPISKRDAKWTEFFHENFRHFVNKDNGKGGVFLTQAQFDNLDIPVEL  
MRMAIEGHPSRPLSPKEKEEAETRHELEMAKPFIEGLGYRKLDNDGKAIGMFPFARDEATGKFD  
DAQLVKEMVAVMEDPICQFGPRNVKAFRAIGILGILQAWKWELATLNEFREFFGMSRHRTRFEDIN  
GNVEIQDALRDLYNDPDLVELYPGLFCEGNGDWDAAKKETGSGLDPGTSCPNGRGTALWRSVFS  
AVTLVRSDFYTIMFLWQDWNVASLTAWGMHEVTSDPKMLKGSVFHRLFQRAFPGYFKYNSIYL  
WQPLYTPAKNMELAAEQGYLKDLAETPEDLDPAIPNDPDRIRRITAGKRPAPAPMEISDYNTIQ  
NEIHAKKDNVYNPVGCDTTPFPDGLLKNTPTSKVRSPDNGTDVLQEMATKEKQRLFLDYFVNMSR  
EITIRERRKFQGVTYQIDITISYAIPIVTRFIADFLGFGDQIRTQLDQRDRKYCENQIYQHFTNCQDYLI  
NSDETTTWKRRMVYRDSMKFLMGITEQGVVDAQKGLFEFFERSYGTKEDSGHVKELRKFGTMVAR  
VLLKEKGKTTEEAAGIMLATALDATHKSILVFTEVIAIYLLDHPKYWQAIQDLASQDTPAADEKL  
MRWVLEAQRIAVDLWIVRTPTKDDPNTLLRGTEGTGEDKKEVTRTVKKDDILVLKVASKGKGRKRA  
PTAVVSGVMPDWASPGRPDKLQTTQVRVSKNFLKVLVSPEDPDVDIIAVHGLNPTNTEFHAEATW  
TVEDKLWLRDPLPPQLPSARVLLFGYNANVAFETSIAGVREQAINLLNRIASKREEAEERPIVFAHS  
LGGIVVKRALVEAKLDDSYKSIREATYGIAFFGTGPHQGGNFXXXXXXXXXXXXXXXXXGLQGKGQA  
KALPYRGGPSIIAVHGLNPTNSEFHAEATWTVEDKLWLRDPLPPQLPSARVLLFGYNANVAFETSI  
AGVREQAINLLNRIASKREEAEERPIVFAHSLGGIVVKRALVEAKLDDSYKSIREATYGIAFFGTGPH  
QGGNFAKLGDIAASIIRGVLNRPSTFMEALKKDSLFSDTLVGDFRHQLEDYHVLSFFETLPMGRGLI  
VDQKSATLGLAGLRERQIPTDVTGCKFESAEGDDYEQVSFNLVRLVKSAAVKAERARIASLS  
VPSSRPLSEAASVDTVTSLSLHLPYAVDAPFNTYSRQRDPTCLPDTRVDLLREIYTWADGKDGRFIY  
WLNGLAGTGKSTIARTVARKYFENGQLGASFFFSRGGDVGHASKFFTTVAVQLARKSQSLQRYIS  
DAVRKNADIATQSLGDQWRQLVLRPLSKLSGDSYPSSYILVIDALDECNDNDYIRIILKLLAEAQTFQ  
TIRLRVLLISRPEIPRHGFYQIPEAEHQSFVLNHSPIIDHDITIFLKYNLGLIGQKKPSLSASWPGEET  
VKQLVQIASGLFIWAATACRFIRDAERVFLIRKRLAAILQIGSSISSGIPFLQNVLKKKNKSS\*

>CYP682B9|105133|Umbpus1

MASIASTAEFSLHHYVILLASLIFAILIGGSVYRLYFHPLASYPGPKLAALTLWYEFYYDCIKGGQYTF  
EIGRMHKKYGPIIRISPHELHVNDPSFINELYAGGNKRRDKYYFYARQFGPSKNIFGTVPDHLHRAR  
RAALSRRFSKASVAKLEPLIVNTVQKLCAQIETYAGTGKPVELSTAFSCMTTIDIVTEYAFARSPHFC  
DPTFEPNFKKAILKGTGLVPFVKQFPWIMPLAKAMPVSVTSHMDPQLGAYVIYLSIKTQIIHVME  
QTEKKNQNAAHPTIFHELLQGDLPPEEKELDRLWAEGQLVVGAGTETTAWALSVMFYLLADPTI  
LSRLVEELVTAIPDPSQLPSGAVLTQLPFLITVISEGLRLSYGAATRLQRVSPSLHFKSSDGKVESYIP  
PGTPVGMTSVHIHQNPDIIPDPLAFIPERWMNDQNRKREDRLDRYLLSFSKGSRQCLGMNLAYTEL  
YFGVAAVIRTFGNRLELFETTQEDVEAHRDCFIPRAKVESKGIRLSPAAEYMSQSLGVV\*

>CYP534D7|105170|Umbpus1

MLSLIAVALLALLVLYAINIYRSFARNLAAAKASNIPYIIAPIYLFQNAWLVTTHRIWMPYLRRLPQR  
WTNPWLDLIVPDWTWVHRHAPFRKIGSDTFMTVAPGGIVLWVADASAIHQITRRNDFPKPIHMY  
RSIDLYGKNVVTTEGQIWRQHRKITSPPFTEKNNHLVWAESIHQAQAMLKSWVGDDSDAVKTIRK  
VADDTMRLSLHVISRAGFVRLWPGVEDGDPPVKGRDAQVPGGVAPSCVAVGRGHTMSYTDAL  
SSLLHRLIAVLLLPKFLKHIPFKVVRNAYESYVEWGKYMNEMYQDKKAEVAAGKEQEGMDLMG  
ALVRGAGLNIDTLNRSPSPEKGQKPPKQALTDNEIIGNAFVFIAGHETTANAIHFSLIYLALNLSSQ  
RHLQRDLDCIFHGRPTSEWDYERDIPKLFGGMTGAVLNEVLRLVPPVNVNIPKSTLKGQPQTILDGK  
KCVVPGGVMVNLISAVVHRNPRYWPTGPPTDPAHPIHPTSNTDNDLEEFRPERWLTESPPDHAKA  
ANIVNGHAVDAQAAKPSDTDDLGVNAAPDTASTLYRPPKGAYIPFSEGYRACLGRRAQVEVLAV  
LAVIFAHYSVELAVDEFAHDEEVEGMTAEERRAVWDKAERKSKVLLRDHMRSIITLQLRGCSVPLR  
FVKRGKERFDYAGAS\*

>CYP5328H1|105800|Umbpus1

MLVTPDRNWLYVAEAEAAAYDIFSRGRDFGRPVWMLEMLNVFGSNVSTAEGSDWQRQRKLATATPF  
NEQKSSLVWAESLRQACDMVDSWLLLEKEGLKSTSEDTRTLALHVLAYAGFQKSYPFRSIAKDNEA

RQPSTYRDSLSIILKNVLVILVLPWAFRIPFLPSKWTQIGWAISEFRRYMMGQLADERRLIAEGKPGS  
GTLMNSNLVRASDTQPDAAAGDAQHRAHDLKALSVDEILGNVFVFNFAGHDTTASLAYSILLV  
AHPETQDWISEELNFYLKSDSSEAWRYELVFPKLNRCCLAVLLETLRLYNPLPGIPRYTGNQPHTLQV  
GHKQIEIPENTLVVFNLMALHHPRYWGQDSLTPRPSRWVRSSNPVNADLGTRLSQTETLMVPRK  
GTFAWSEGARNCPGKKFAQVEFVATMAALFRNFHAQPVAKVGETSDAARKRVLEVVKDSNVEL  
LLQMRDPESVSVSWSRR\*

>CYP51F1|105802|Umbpus1

MGFPAMLFGLSEQLSNQSTGVVVGSAISLCLVLAIVLNVLSQLLFKDPKEPPVVFHWVPFVGSTITY  
GIDPYKFFFSCKEYKGDVFTFILLGKKTTCVCLGKGNFILNGKLDVNAEEVYHPLTTPVFGAGVV  
YDCPNAKLMEQKKFVKFGLTSEALRSYVPLIVAEVEDFLKRSPLFRGPRGTVNIPSVMAEITYTASRS  
LQGKEVRDKFDDSSFADMYHDLDMGFSPINFMLPWAPLPHNRKRDYAQRKMAQTYLEIHKARRES  
EQRNSEDMIWNLGRVYKDGTPDPMEIAHMMIALLMAGQHSSSTSSWIMLRLATRPDIMEQLY  
QEQISVLGPDLPPLTYDALQNLPLNAHVRETTLRLHAPIHSIMRKVKSPMPISGTPYIIPSHVLLSAP  
GVTSATPEHFPDPSEWEPHRWHGGAGLTAEEDEKVDYGYGLVSKGASSPYLPFGAGRHRHCIGEQ  
FAYVQLGTITATMVRAFKVRNLDGVKGVVGTDYSSLSRPLAPAVIEWEWRGKA\*

>CYP531N1|105844|Umbpus1

MTSSISSALLHVVLGLVFIIFSTLSWSYLSPTLIAIPGPLVAKFTNLWRLISAYRGLTAVYSRRLHERH  
GTAVRLGPNLVSLSDPKLIKTLYSFKGDYKKSFAFYNASHVLSPKGHVVETQFSTQNEQYHGQVVRPI  
RKYYSMASLIGFEPLIDQTINNLCRRLKQEFVDGPHAGKTCVDKDWLTYFAWDTMSQISFSQTLGFL  
DHGSDVHDLIHGSSKFTDYVTVVGQMPRLDRYLNKNPYCRSILPQPSFAILINFSIKAMKQRQSGFD  
KERTIDFLDRFFEIQATNPTEVSDNLIVAWVMNNVRAGSDTIATTISAIHYHVLKEPAVLKKLQQL  
DDAAVKAPVSWKTAQTLPYLGAVIQEGLRLHPAVGLPLERIVPDGGLTLPDGRFIAEKTIVGMNA  
WVVHHSQEVFGPDTSFVPERWLIHDGEEEEAFRQRRRAEMMAGMLSFGGGKRVCMGNSNLALLE  
MHKVLATLFAIFDINFVDPTQEWRLKRTWFVQIEGINVTLKPRGRHADHAELAGLSGDRAGS\*

>CYP676E1|105895|Umbpus1

MSEVNPVHCTTRKKKLQAGYAPKSALKRLDCQHASTFVHIFDTSRRAIRSRSVIQASKEKPTEDDML  
DRWLRTKQEHPESHYDEMEIETAGTSAIGAGADTTSAALQAFFYHLLRSPEHLDRLRQEIDTAQSQ  
GKLSKIVSYEDVQELPFLRACVQETYRMHPSVSFPLPRVVQKGGLTVDGRHFAEGTSLCIHPWVIHR  
SEKAFDSDAKKFNPTRWLGPKAKALQRYMVHWGKGYNMCPGQHLADIEITKITATLIRDYDFELV  
NPEQE\*

>CYP677H1|105927|Umbpus1

MAGDQRWISIATSVLGAWLLTRIVQAVVSVYFGPLSHVPGPKLAAATTWWRAYIEVVKQVSWTDK  
LLELHVSYGIEQELYPLLMVILLVKSMLMWNLRAGDALHFSRPSTYHEIYNNTLRWDKDEILYHS  
FGEDHSSFGVLTYNESKKCKDRLTPLFSRRAVNMQGLIQDKVNQFCEILKKNADGKSSDLFLGF  
RCLTNDVIMCFCFARSVDALNAPGFKAPIIEAMDASGSSFPVFRNFALIRRFALPWPWSIRLSPATA  
GIFEVVQMLRAQVTEVVANPKLLQNAPHPIIYHELLKPREDAAEVPSFVSLCEEAAQTLVFAGSDTVG  
NTLMLGTFHVLNTPILWRVKEEVLQAWPVLSECPKFEQLEKLPFLTAVIKESLRISPDVSSPLTRVVP  
SNGAKISGTAIPGGTLVGMSIFVHNNEISYKDAFTFNPERWLGPD SKGLDTWLVFFSKGPRSCMGS  
TLAWCELYIAFAAMFRFDMKLDDTSRAIQSLSSLKDYKKEALSSTLRRIESLQPLLDQRVQDADEG  
TPTTLPGKPLPVPSLCTLHNGGREFDNVQDHISNLEARNLPALQPGSASRAQPGLLDSAATFPAPVL  
GSAGDDEITHHPVHRAAARRAEYQDGRRSPPRFAAGRRWRCAPSNPLLAGIDVARAGLWHRG  
HDGHGAGAAGPAPRRAGAQVEAGKTPSKEAAKTPGVDGSAVEGDPLPGFQVFALNWETTSVSSL  
APTLGESASGLNLVLTCCGNYSPLYFEPFVRACAENTARPPVACLIAQQLRPEPVFEAWLASSMREF  
AVRKVPDELLEDLQSSKVFLHSGILKTA AEGWPLCR\*

>CYP6001C39|106146|Umbpus1

MLRRFSTVFKKGKKDESKGDGFNGVNGVNGSSSSAKPDPQRRRSNLTPQKKEKEPEDHSAGRAEV  
ASTFEQYAQLIHASRRPLPTQSGDGAYLDHDIPSGLMDDLKHLGFKDVGTLMGMVMTKASGELAD  
DKTYLMERVIQLVSALPQSSKNRVDLTNSFLGELWDSLEHPPLSYLGDKYTYRQADGSFNNVMFPRL  
GAANTPYARSVHPNTIQPGALPDPALIFDSVFARKQFTPHPNKVSSVFFYWASLIHDLFQTDHRDF  
NNSQTSSYLDLSPLYGDVQEDQDNIRTFKDGKLPDCFSEQRLLGFPFGCVLLIMLNRFHNFVVE  
QLAVINEGGRFTKPNPGLPPEIAEMSWAKYDNDLFQTGRLITCGLYINITLLDYLRTIVNLNRSNTT

WTLVCRASPNTSSCSLRQDPRVEIGKVFGQDGAPRGTGNQVSAEFNLAYRWHSCISEKDDRWTQ  
DMYKELFGKDAHEVSLPELLKGLGQWEHNLDKDPQKRPFHLKRQSDGTYNDDDLVKIMTEAIE  
DTAGSFGANNVPTSLKAVEMLMGQQARKWGLGSLNEFRKFFGLKPHATFEDINPDPNVADQLRH  
LYEHPDYVEMYPGIVAESA KVPMPGVGIAPTFTISRILSDAVALVRGDRFYTVDYHAKNLTNWG  
YNEVQYDLNVEQGCVLKFLRAFPFRHFQANSVYAHYPMTVPSENKIILRNLGREDHYTWDRPAA  
IPPRVNLTSYVGAKYILERPEQFKVTWGAATGYCMGKGGFDFMLSGDSPFHTKQRELMASKALYRD  
QWHQEVKDFYEHVTLKLLREKSKIAGINQVDITRDVGNLAHIFAAQMFSLPLKTAENPHLIYSE  
QEMYMVLAVIFVCIFFDLDPAKSFPLRLAARAVTQQLGKLEANVKTVMNTGWVANLVDGRREN  
HSPLKDYGVHMIRKLLSGLGVNEVTWSQILPTATAMVANQAQVFTQLLDYYLGDEGQVHLPDIN  
RLAKLDTPEADDCLLHYCMEGIRLNGTFGSYREATAAMTIDDGGRPVSVKPGDKVFCFSVGAARD  
PKIFSPDSVRIDRPLESYIHYGDGPHACLGRDASRVALTAMLKVVGRLDNLRRAPGPSGQLKKIPR  
EGGFYIYMREDHGSYFPFPTTMKVHWDGDLPLK\*

>CYP51235A1|106159|Umbpus1

MAATYNSIALWVLVPVLAVYFHYLRXLVRKDCREPPVIRPTIPLIGHIIGLLRYGTDYYAIINTKQQ  
PVYTLEIFNTKTYVVSNDLMDVAAAQRNTKTLFNPFLFSSKRMSQYDKAGMAVVNNNIEGAHGK  
WGYIPEMLDGVHHTLAPGALDKMNHTVLDKLCPAINGLRDGETFGLQAWIRGLFTVCSLESIYG  
PDWTSSPELTQAFWDFERDITLCADVFTILAPKAYKGRQLFADFTEYLRKGGQERGSLLIKVRY  
ATAVRNGLTLYHVARGETALLGILPNVTASTFWILLYIFSRPTLLQELRTEIAHAISTSPSTPTDPTTH  
RIDITKLRAQCPLFVSUYQEVMLRKSTNASVRKVLADTLVADRYLFAKDAIVQMPSASIHNNAAFF  
GPDPAKAFDPRRFIKPDHATAKGAKRPPGTFRVFGGGATLCPGRHFASTEILGSVAVMAMMGFEISPAE  
GGKWWVPRTMDSRLMTAILGPVGDVKIRVERRKGWEGVRWGFATSLVATEVEMDTL\*

>CYP6267A2|106265|Umbpus1

MSLLAIVAILLALWAIGTVVYRLFFHPLASFPGPKLAIATYCYEWYYDLIRGGQYTFKLKELHERY  
STQPKVLHFNDPDYDEIFNITNGKTEKPYKAANTFGPYAAIGTVDHDLHRVRRGALNPFFSKRS  
VVEILPFVQNIIEKLCHRFDAASTGEPTNLKYSYAALTLDIMNEYCFSTDPQNMKSDYGRKSLDD  
VDSFLAISLVNTHIPWLMRVMYSLPDWFSRIINPAMVDILELREGLAKQVEDIRHGNDLSYEQSGHR  
TIFHSLLESKLFPPEMKRDLRDEAFSLITAGSITTAHVLRVSYHIAADPAVRQKLFQELRTVMPKR  
ADRPKLQDLERLPYLTAVIREGLRINNPVTHRQCRAFPDKALRYNGLTVPPGTLIHVTALLIHENERI  
FPEPRAFKPERWLGPQQPQRYLVFVRGTRACLGINLAWAELYLILATVFRFRDFDISSVIRERDID  
VAADMIIGVPASDSQGIIVKVLATQD\*

>CYP504A47|106500|Umbpus1

MAHQIVGIALIAVFFFVIRYLNRTDVPKIKNLPEVPGVPLFGNLLQLGDEHAKKAAVWAKKLGPVF  
QVRLGNRRIVFANTFESVKHLWITNQSALISRTLHTFTVSSSQGTIGTSPWDESCRKRRAAATA  
LNRPAVQSYMPIIDLESNASIKELLADSDKGQKDIDPNPYFQRFALNTSLTNYGIRISGIDSALLKEI  
VHVERVVSNNRSTSNWQDYIPLMRIWPGRDKEAREYRERRDKYMTLLDMLKDIAKGEDKPCI  
TGNVLKDPEAKLNEAEIKSMCLTMVSAGLDTVPGNLIMGIAYLSSPHGQEIQKRAYEDIMRVYPDG  
NAWEHCLTEEKVPYITALVKEVLRFWTETPPDAMPHGRNTNADNAALAKYHKITKPVPPIAIPAT  
ETPREPKSLNTGIPKGGMQAGENGAGTR\*

>CYP532A32|106652|Umbpus1

MLEPIVLLARQHWVTAIAVALVAWLKKNRFNHDLQRYPGPFLASLTDWWRFWDLGRRPDITHV  
KLHREHGDVVRLGPNVLSFANPKALKTIYGLNKGFSKSEFYVQMALSKGSRLPSLFSTTDDDYHA  
ALRRCVNSAFSMTALVEYEPFVDDTTEKFLDQTQSLFVSKNAVCNFAEWLQYYAFDVIGAITYSKR  
HGFVDRAEDVDGMVKKLGRFSYVAPVGQIPILDFFYKNPILRLLDRCGILSFTFPVVTFAKARMSE  
RLSEVHQAKVDGMDPEKTVLVRRGDLLSMFLKAKEDRPDFFHDGRVLTMAVSMAFAGSETIAISL  
AAVFYLLKNPNCYQKLMHELDTAISDGTVEDRLNNLVTWAESQQLPYLGACIKEAFRLHPAAGL  
PLERVVPAQGIDICGEHIAGRTIVGCSAWVIHRRPEVFGDDVDTYRPERWIEAGKEKRKEMEATMF  
QFGMGARTCIGKNISLMEIYKLVPSFLRRFEVALANPDQEWKLHNAWVFKQLNFDTTFRPRRRDV  
AAAA\*

>CYP65FF1|106952|Umbpus1

MAGTESIITPEGVLMGLSLLGVGLTYLFARAVYNVYFHPLSSFGPRLAAASELTKSYYGARGRMIP  
WVQALHQQYGEVVRIGPNELSFITDSAWKDIYMHRPQFPKHFNFTNPNETDALISADDASHSRQR

RLLAHAFSDKAIREQEALLHVYVDLLVSKLQEESHARDGVVDLVDWYRYTTFDVIADLCFGESFHG  
LENKVEHAWVSSIYSSMKATHFLDIAAREQSFKYPQKKVTARLNRETDRPDFMSYILRYNDEKGV  
RDEIDSNFETFTIAGSDTTATLMMGYTYHLLQNPVKVLERLNAGVRTIFDSAQDIKLAALGKMPYLIA  
VLEESLRIHPPVPGGFGRRLPEGATISGRWVPGGTAVNIPQKAANVSHHNFAEANFFIPERWLEV  
HDPIFDNDRKGVVQPFSAAGPRNCLGKNLAIAEMRIILAKMIWHFDMELMNVDKDWTDQRLFVLP  
ESKPLLVLKLPRL\*

>CYP539A52|107164|Umbpus1

MIDELLKSLSFGRVFSAAIVIYSIVFYSRRLRVDREIRALGGHAPKVRTYLPLGIDFVYRGITATVKHR  
NLELWEWLFKSGNANCPYTVEVNVASERLLFTADVENIKAILTTQFADYGKGEPFHKDWRDFLGD  
GIFTTDGAEWHKNRQLIRPQFIKDRVSDLETFEVHVQKLIGLMGGRGEEVDVSELFFRYTLDAITDFL  
LGRTINSLANPQVKFAEFAEAVQVRVQNIISRAGPFNWLVPRRSFFAGIKILDSFVTPYIDDALRLSPSD  
LEAKTKSSTGYTFLHALASFTRDRTTIRDQIVSVLLAGRDTTAAMLSWLFYELSAHPAIVRTLRAEIL  
ARLGPRTPTTYDDLKNMRYLQHVLSETLRLYPGVFPNVRLALHDTTLPHGGGPDGLQPIGIRKNT  
VGYSTLLMQRRRDLYPEPSAAFPDVAVFAPERWEHWTPKSWTYIPFNGGPRICIGQQFALTEMGYT  
VVRILQRFERVERYWKDGEQVLKAEIVLQPGAGVRVGFWEAKGEA\*

>CYP584AS1|101694|Umbpus1

MTISPENIKALLSTQFADFRLSHRLPFFAPLITGGIFVSDGPAWQHSHRALIRPAFTRDQVADLPRFDR  
HVQRLVSQIPVDGTTTVDLMPLFFRLTLDYVTEFLLGESMESLSAPGSEQQRFGAAFDYVQRQLAG  
WNTSGWGAWVWPNNRCEEGRVHVHGVVDGYVERTRTKARAARGRAAGREKDAETEVESSGGA  
KQEKDGEEESGRYIFLDELALSTDDPVEMRNEVLNIIFAGRDTTASILTSTFHALARRPDVWARLR  
AETAPLEGQPPDYKTLRNLKYLRVVMNELIRLYPPVPANHRQAVGDTTLPHGGGPDGTSPIFVAKG  
QVVGYSPPWSMHWLYATFPDGEALRPERWADGEGEGEKEGI\*

>CYP51191A1|102665|Umbpus1

MDRRAQAPSCGLHATSQGGERPIRRLSQHPYLFGLDTLYQDFIDLHCHNSTRRALSRLHNAYGQTYI  
FTVFGHSTIHTIDPANILAVTTNDFADYEKGDWAQTIKYMKGKVLVNDGKEWNASRTLLKPLFR  
RNRAADVRRMFERHVDCLIEYLKRREGQFIDCRKTAQMVVLDITTEMLTGQSAVSFKRSGSEASMED  
DGQSMRGPALLDLIDELEPYGNMGIELGLFALPVFALRYRKIMSLIKGIQRFETAISDINADMGRRH  
RDEQNCCERNNIIEMLAQGLAPAQVQGELQNIFFAAFDTTTALLTNVFDCASTRQPDLIKRLQVECT  
AVVGSRLVDEADITCMPLLRATIFETLRLHSPITYHTRKARTDTRLPRGGGTDGHSVPFLPRGTSITW  
STYALNRQAWAYGDDWAFAFKPDRWLRDDGKTVASTETFMFPGSGPRNCLGQQFAMLQVITYIAA  
RLLTAFEHFELKEWAVPFQEAASVTHYNGQGTWIKFR\*

>CYP584AS2|104412|Umbpus1

MAYLTTLALFALAVLTIYGAYTKTRRYLTIRAFKTHHKCQPPRPLPGSGLIGYRVIKELWTSHRAAN  
SLEKHTAHHRSRGDTWELSFHVDLIMTISPENIKALLSTQFADFGLSHRLPVFAPLLTGGIFVSDGP  
AWQHSHRALIRPAFTRDRVADLPRLDRLHVQRLISQIPVDGTTTVDLMPLFFRLTLDYVTEFLLGESME  
SLVSGPDSEQQRFEAAFDYVQRQLGGWNTSGWGSWVWPNNRCEEGRVHVHGVVDGYVEKARAK  
ARAARGREAGKEKDAETEAASGGDAKQGGKGAEEKSGRYIFLDELALSTDDRVEMRNEILNIIAG  
RDTTASMLTSTFHALARRPDIWARLRAEIAPLEGQPPDYETLRNLKYLRVVMNEMIRLYPPVPANSR  
QAVRDTTLPHGGGLDGTFFIFVAKGQVVGYSPPWSMHLRHATFPDGEALRPERWADGEGEGEKG  
IRAGWEFLAFNGGYCLYGIMATEKLRELEKLEAKPTVGLGFLPSTPSLSTATAAVLARDQACTLSGD  
SDYMQRAHLCPRNELIWFRKNSMRRYNDRCELSGDNLMDDSANALAMRPDIHQAFDACKFVIVP  
KNQRWVVHFLGKTNNLGSSFHNMPVSVLATAKPEFILARLAWAVFPLVKSFMELGPSRLVRVRVE  
AEDGAQEVQRTITPVEFSKLESKRSRSHSPKKRKASLPVIPEDTSSAKSRQLDDSSLTDTPSLYYDD  
EDGQETQHESLGEHEDDNSEEGRIANLRTHELRKRQPIVILA\*

>CYP52AG3|105887|Umbpus1

MPEDPQSPFHAPIITPRSGASHTQLTVLALVLAYCFYRYVQKQMQRSETAFGDAHGCLPMKAKIP  
FKWPLSLDLVKQTDWANTDQRLAFYQQFFDNLGNLEQKLLGGIGYVTIDPENIETLLSTKFQDF  
GLGSRRPAFMPFLGEGILTQDGSAEERSRDLRRQFVRAQYQNLEGFSEHVDNLLACMSSSSSGAV  
DLQPLFFRFTLDTTAFMFGQSIGSLKSDVLESFGSSFNEASLISSMRVRLSDFYWAYTPSRYSRACAVI  
KRYTDDYVNLALSEVKGHGADATSNRYVFIKELYEELHDPALVRDQLVNVLMAGRDSTACLSW

AFHLLLRHPQVLERVREITSVVGDEQNLTRAHVRKLPYLKCVLDETLRLFPSAPINIRTSRLRTTSFPR  
GGGPDGSSPVLIRKGMGIGYSIYHMHRRRDLYGEDAAIFRPERWEGSKLAHIGWGYPFNGGPRTC  
LGKDFAAMEATYGIVRILQTFPNMRLPPGLQLEEVGMEKQALTLTVSIANGCKVQLY\*

>CYP52P13|105889|Umbpus1

MVWDFRVLSSQIAPRWVLLLVLGFVALGLLHIHRWLDRVQREKRLEATLISDTRCQDPPRLRYRWP  
LALDLLIEAFKADQAGSILQFFLSVVDRTGHTFEQVLLGARGVDNDPKNIESVLSTQFENFGLGAR  
SANFRPLLGHGIFTQDGEPWRTSRELLRPQFMQTRSKSFTDIQEQIEKFLINVKASSAGVVLDLQPLFF  
RLTLDTTMAVLFGKTLDSMKTKVSGDEAFFARAFDQAQHELARRGRLGDLYWLLDGFTFRRSCRI  
VHEFVDKIVVDALNETRPGMASEEPTGRYVFLTALISKTRDQRVLRDQLINVLLAGRDTTACLSSWT  
FTLLARHPEIQQLRNECEDLPSFREGGLPTPAEIKGMKFLGHVLQEVRLRFPSPVNSRSALKTTTTL  
PTGGGPDGLSPVLVRKGEAVGYCVYAMHRRKDIYGDDAESFRPSRWDPDNKEGPDLDKGVGWGYL  
PFNGGPRVCPGQDFALLEASYTIIRLLQSFRHIEKAEPSTAKERQTLTLVVASATGCKVILTPALLEG  
TLREAEARF\*

>CYP6544B1|101378|Umbpus1

MLSLTKSLDAVHEKCMSQGETTSLIIQLTKATLLDAGTAALYGDQLISISPDFITHFSAFDTNSWMLL  
YHYPAPLAAPCNIPKRKVLSAFTAFFSLPHSSRSEVAQFLQTIEAEQRKISLSNADIASSAFIFYWAINS  
SPWKLAFWLLCYILYDPQLHANILAETKPAIRPDAPGLVDVQHLVTHCPHLEATFNETLRLVAAS  
SIRNVIAPTSIGSKILLPGSRLMPYRPMHFSSKIFGPHTDQFNPSRFVRNPGLSKHPGFRPWGGGSTF  
CPGRFLARREICAFVVGLLHRFDVEVVEGETFPRRDEVTPNLRIMEPMKGDDLKVRFRSRHFFSHQE  
QIPSSVAVRFPAGEAIMSSEPEHVQARPKVNLNDASGAEKREVNDTATAILKKKKKPNLSLIVTDA  
VNDDNSIIALSNNMETLQLFRGDTVLVKGGKRRKDTVLIVLADDELDDGSARMNRVVRHNLRVK  
HGDIATVHPCPDIKYAKRIAVLPADTVEGLTGSLFDVFLAPYFREAYRPVRQGDFTVRGGMQRQE  
FKVVEVDPPEYGIVAQDVTIHCEGEPIQREDEEGLNNEVGYDDIGGCRKQMAQIRELVELPLRHPQ  
LFKSIGIKPPRGILMFGPPGTGKTLMARAVANETGAFFFLINGPEIMSKMAGESESNLKAFEEAEKN  
SPAIIFIDEIDSIAPKRDKTNGEVERRVVSQLLTMDGMKARSNVVMAATNRPNSIDPALRRFGRF  
DREVDIGIPDPTGRLEILQIHTKNMKLSEDVDLESIAAETHGYVGSVDVASLCEAAMQQIREKMDLI  
DLDEDTIDAEVLDLSLGMTMENFRFALGVSNPALREVAVVEVPNVRWDDIGGLDDVKRELIESVQY  
PVDHPEKFLKFGLSPSRGVLFYGPPTGKTLAKAVANECAANFISIKPELLSMWFGESNIRDIF  
DKARAAAPCVVFLDELDSIAKSRGGSQGDAGGASDRVVNQLLTEMGMTSKKNVVFVIGATNRPE  
QLDNALCRPGRDLTLVYVPLPDEAGRASILTAQLRKTPVADDVDIKYIASRTHGFGSADLGFVTQR  
AVKLAIKQSIADIERSKEREAAGEDDKMDEDDGLEDDPVPELTKAHFEEAMQAARRSVSDVEVRRY  
EAFQKNEWNR\*

## P450-fragments

>CYP505A-fragment1|118844|Acastr1

MGTPIPTPPGLPLLGNDVDPENSIASLMHLAELYGIVTTTLGYNTDACADRNSPTGPIYRVVLGGQ  
ERVIISSHELLDQICDERRFSKAVSGPLGQIRNGVHDGLFTAYPEEHNWGVHRVLMPAFGPLMIRS  
MFDGKLTPASARLHR\*

>CYP630-fragment2|119576|Acastr1

MLYSKRSHALLQIHQTHPIVQIGPNLSYGDVKTIKDIYAHNTKCLEDTFYTLLSGTHNRLADVVDK  
PEHARKRMVWSSAYALKNLEGWEHKVADKTERLINGFDARCTARYRKDIRARKLNS\*

>CYP59U-fragment2|119928|Acastr1

MLDRLPRNAHYQYALGDVAREHFSKEGVYFDLWPVSDLFLTVVSPNIANQIHANPEISMGRPSLL  
PRFFKPICGGPSMFDLREKDWKPWRAIFSRGFSADHVLVSLVPGMVDETAVYCQTLRSLAVEKTMFY  
PDLTTLRFTVDVIGKTLVSVSVSSLSQN\*

>CYP682-fragment1|120003|Acastr1

MELPKAFNHIRLSPSDIPLFAICVLLVYTVYGAIYRLFLSPLAKVPGPRLAALTDWYEEYYDAVKKGR  
YTWKIAELHEKYGPIVRINPSAVHIHDPNFIDEVYGGGKKVDKPSRYASMFGIKVATFATDLHEKH  
RVRRTLINMFFSKRSIAKLEPVIQSVVDKFCNRLEGFRKSGEPLNLRNAYMAMGTDVIHQYCFAAP  
NYYLDEPDFQPSLYQALIEASQMAASKAISLKKDWTIREAQIQELMDAGEEARNKTEHATIFHVLL



DEKVPPQERTLFRLGEEAISLIGAGGITTQHTLQTMTHILANPPVLDRLTAELKQAMPDPNIPAPL  
QQLEXXXXXXXXXXXXXXXXXXXXXXXXXXV\*FV\*

>CYP527G2-fragment1|122578|Acastr1

MAILKLTEDTTILLKYSATLVVSWYIISSITTWYKLRHIPGPFLGKFYHLWSIYHQLAGDVGPVHLEL  
SKYNSPLVRTGPHYLVTDDPNVWRHVNGARSIYQRDAWWSAGRIDYQRPSLADTLDAASHDKMK  
AKLAGGYSGRDVDLERIIDGQIAKFADVMRRKHVDRNKVDFADRSRFFTLDVITRLAYGKEFGWV  
EADEDLYGYGAEISKFAALGALISDVTWLHPFVRWSFINSRFPKPTARHGVGKVVGLGREEIQSRF  
AEDKKDDRDMIGSFMRHGLTVTEIEDEALIQIFASSDTTAIVIRSVMLHLIATPRVW\*

>CYP5328-fragment1|126188|Acastr1

MTNSILLLLLLLPLTFVIHNLCLNYRIARKIGIPVIVLPASPDHPKHFELGDAVVVFTPAHNWVYV  
CNAQALKGIFQRRNGFPRPPEMFLVARRAVEAGPQVQLQGLARFDTGKLVVDSCPWSEVAHKVA  
PTQDGC SLRGNLAGKISSALCSEPRREWPIQQQLLAPKAQGSEVSLSPKYTAISSFIISRDITQLPLHSS  
YALYLLAAHPEIQVLISEEINAAIPDDHSSTWKYNEVYPKLNRLCLAVLLETPLRLWDPPIGIAKSTGAN  
PQVLPLDDCEILIPANTRVIPNNNAIHSHPRYRWC\*

>CYP5328-fragment2|126855|Acastr1

MPSLLAVQTHPEYWQDPLLWQPSRWISVSSLLAVQTHPEYWQDPLLWQPSRWISVSPVPRSSKPEL  
DLTSRLRQEVVFTPAQSTFFPWSDGPQNYPGAFAQVELVAVLACLFQDHRVGIIPTPNESFNDARK  
CVLDVTEDCDLELLLRMRNADKVRPAWRRV\*

>CYP5334-fragment1|127116|Acastr1

MFAFGFGPRKCLGQYLAEHSIKTLIIHLIDQYQLGLRHGQNKEADYKVEEGNWIPLADVEIDLRLR  
\*

>CYP548W-fragment1|118920|Acastr1

MTAVSFGADYRTMEEPQFRYVVEAIEKSNVRLGVLMQASELTFGGLDRKLFSNAAKAGARFVKFL  
RKLLQKRLQQEPADTVKDIFSFLQQLLEEVRTTFSSADEIAFGAKLNSCVFLRACLDEALRITPPGGGP  
LWRVVELGGTRIDGEYVPAGCEVGSGIYAMHRSPRNWPNPGNYIPERWLENKEKDKSENQENKN  
ARQPYFPNIGPRSCVGKPLALAQVMLTFAHILWEFDLRSANAGEPRLETDDTEPPEYMLQDHVTG  
QKEGPILHFRPRF\*

>CYP684-fragment1|119584|Acastr1

MLEKGEEDRYTQDLKKNAAYSNIRTELSTLCKMLSVLPLPIMRELQETPLRLLGHARQSLQRYKNLL  
ATNPESVTGKMLFSKLFRAKDDGGLTDADMEVEAAAYIIAGSDTTAITLTYLIWVVAQRPDIEKL  
GVELAVLSDDFAYDDL RHIPYLDHLIDEALRLYG VATGGLPRIVPPGGHTLAGHFVPGGLTVSTQA  
YTLHRDPSIFDEPEAFRPSRWEKATPAMKEAFLPFGAGTRICIGIHLARMELRIAVATFFRSFPRTMV  
ADAEGMSEKDMEMENCFLISPKGRRCLISSR\*

>CYP59U-fragment1|119927|Acastr1

MDKYIGDELDKRYDEYKADPEGQQTKAVIDLVLQAYLPQDGKTRPERLDPEFRAFAISQIRLFVFG  
HDSTSSTICYILHLLATNTDALAQIRAEHDQVFGTDL SAVPSTMKEQPHLTNTLPYTTAVIKEALRLF  
APAGCNREGKPTATLVDDQGNHCPTEDAVVFTIHTELHRAPTYWIRPDEFLPERWLVESAPSIRNC  
TAHPPTGFDPTSSSRSDGWSSLNTSFTR\*

>CYP682-fragment2|120004|Acastr1

MERSYPDRAFKYGDYVLPNTSVSMTTMLIHDDPSIFPEPRKFMPERWLDSEQDQDCHPNPSNNYD  
GGEKPLQQEQSQQQRLAKYLLPFGGRSACVGVNLAYAEHLALANIFRKFELELYDVVPERDVD  
VLHDFNPNPALGSGVIRAKVVGRVA\*

>CYP676-fragment2|120182|Acastr1

MEDSTLQGVQSTVDAKDASRRQRNIGNAYTLSSLLKSEAQIDDVLRKMRECFDKVADTGKAVNLG  
EWWAWAAFDVLGELTFSHRFGFLEAGQDIDGAIAS TELMMIYGVTMGYALKLNTLLVDNPIIRKIN  
RWFNITDKMHLAKITMSALAKQEENPEASHNMVSQWISNLAKNRDTMSPDEIKAAAIGNVGGGS  
ETVSATLQSAIYHLLRTPHALHLALAEIDAAQLSPIPLHTEVAKLPYLQACIKEGLRMHPAGPWNLP  
RVVPPTGLTLGGEYFLAGTILSVNPVVIHHHPSLFRKPESFEFERWLDEQQRRVEEPFWIPFGAGYN  
RCPGRQLALMEVPKMAALMLRDFEFERVQGGRDWVWRNNFTAVPG

>CYP6798-fragment1|120348|Acastr1

MTNNEFNSQNE DMPLLD SFIKEMARLN PPTINGTHIPAGNWACVPHQAMMQDLANYSEPTIFNG  
FRFVNGKDGSAKSDRGS LIPVGS SHTGHL SNKCGQYLLLPLGLTVQRRPSTPMWKPLGQDTEAVKT  
ICPARFYVSMVVKMILVQFLTCYEFKLADENVPPAFAWGIQLHAAPTEAALGRRARPTTIKKVSPTC  
NTARGSTVEIAVLVAHRRKWRKLRQDIDATSLHEEEAYEMPSPIPNESPVCLPPALEKRSTRAVKA  
SSLARELVDHVSRTGGVEVLKELGETLFRGVEVLKELGETLFRRLRAHSGRSQVTCKS\*

>CYP65FT-fragment1|120400|Acastr1

MWKGRMPHVARS LHDQYGD TVRISPTGLSFSSQAWKDIYGIRPGKPQLPKDPAFYFPQKEGPSIFIS  
GDADHSRMRRLLSYAFSERAMREQAALVSEYHDLLIQKLHEEIQGPAGGKVDVVKWYNCCTFDII  
GDLTFGEPPFGSLEKGGYHFWIANIFKALKMTQELHPTSSEARAKHARFSAESA EKRLALNTDRKDF  
MSYILQYNDEKGM SVSEIKQNSKILVLAGSETTATLLSGATYFLCTNQDALRKVTA EVRRAFSNSSEII  
LTSA AHLPYLQAVIDESLRMYPPVPSTLPRRTLPGGDVVNGQFIPSQVT\*

>CYP5148B-fragment1|121990|Acastr1

MELYTRYISDHV VAKTFATTFGFIASAAALCVLFLPPTLSSKKRTDESKIPGPRGWPVIGSFNSLTHYP  
ELVLDKWAKAFGNISVWLGNQLFVIVSEASIAKDLMVTNGNVFSSRKEMFLKSQTIFAGRGITATP  
YNNRWQAPKYIKRN\*

>CYP527G2-fragment2|122577|Acastr1

MPQIAVVVCTGMRTTNYGRLRVYTILTFPPFPDSRLKTDIRNAVSSGKVSIPITLAQAQSLPYLQAVI  
WEGFRMRPAVTYGHYKVPPPGD TIAGI WVPGGTAIGHNHFGMMRNERIFGDDVDVFRPERYLD  
KPNGDEMQR TVELVFGTGRWMCVGKQVALMELNKVFWETK VWELGSRLMLDEQLLRQFDFQLA  
HPDKAGWKETSSVTFTHRDMWIKITETEK\*

>CYP653-fragment1|122722|Acastr1

MFPGFLHPLVSKVLPSVWRLKKQLKAVKEELLVSIINERRTAQRSSVLDYEKPDDFLQWMMDLAEN  
QTDAEAGNLAHRL LGILSMAVVHTSAMAVVHVLFDLITMPEYLEPLRTEIQHLLPQGWDKATQSE  
LLGMSRLDSFLRESQRFNPPGHLSFN RIVKEPMTLS DGLKLPEGTHICMPSPISMDNTVVPNADTF  
DGFRWFRENKPTAAFANTSPTNLHFGIGRYACPRFFAVYMIKAILSRLFLDYDFRFHEGQRGRPK  
NILIGDKVMPDIYTELLIKRRTV\*

>CYP59V-fragment2|122889|Acastr1

MVWTLIQAIHRDPRYWPQPD TFLPERWLTSKDDPLHPVKGVWRAFEFGPRNCIGQELAMLEMKL  
ALTMTVRKFDFSARFEWEQINRRKGPKTINGESAYQTL DGTNRPRSGFPCRVTMRGS\*

>CYP5104B-fragment1|124265|Acastr1

MHRTMIQLHKKH GK LIRTGPNELSVADLTAIKRIYGPGTKFKKSDWYSVWQGHRKFDLFAERNEGI  
HGSQRR LVSRIYSMDSLKDLEIYVDDAVSHFMTKMRELQGGQSVNMGLWVQLFAFDVIGEVTF SKRF  
GFMDAGVDDG SFRQIEGALRSAAWIGQVPWLYWMNDFLSPVIGNHLGINARHGSLRTFAASEITK  
RRDRGSDHQDILDKLLQVQKEKPEEMNDMAVLSMTTSNIFAGSDTTAISIRSIYYLLKNPEYKRKL  
VEIDMRKSQGKLSTPVTLEESKHMPYLQACMYEALRCHPAVGMSLPRVTPSGGIEIDGCFIPEGVRI  
DFYSVLRLADPQPTLDNGWSQSLGCPSQQGGLWR\*

>CYP5105A-fragment1|124382|Acastr1

MAGTESTAKSIAIVHFHLLANPPLMAKLRAELRTVPENASWPELEQLQYLSAVIAEGNRLSFGVTA  
RVCRIAPDEALQYKQHTIPGTPVSM T T LCVHTDETIFDPWTFNPDRLGLPLGAERRKYQMAFNK  
GGRNCVGINLAHAEMFLVVA AVVRYDMELFETDISDVEFQHDYHVSFPKLD SKGVRAVVRGKAA  
LV\*

>CYP676A-fragment1|124880|Acastr1

MFFLTDLRSCVAF AAGTFVRITYNEVSVDPEAVDKLLLTRLRKGDIFYQAFALPDHNYGNQMSEL  
PKEHVRKNKNIASGYALS NMKAEPYVD TI EL FERRLDQMSQMGEKVELDRWFNFCAFDVVGEI  
TF SKRFGFVDQGRDIGGA IANSRKL TLYISLIGHAYWLHGILLANPIIGWLN LQPSNHVFETCLAAVE  
ARKKNDKVRKDM MELWLEQRRTHPDRMQEKEILAAAVSNIGAGADTISTTLQSVFYLLRNPKHL  
NRLREELDDAQSHGNLSPIVAHMEAQKL PFLQACIKEAYRFHSAVSFGYPRVAGKEGITIAGRTFPE  
GSLLSVNPWVIHRNTDIFGEDAESFNPERWLDQERLRMMMDKHLIHWGAGYNQCPGRNLAHLEISK  
ITATLLRDYDIEQVDPKQEWTYESW FVALPSNWPCYVKRRNVAKVE\*

>CYP50105-fragment1|127121|Acastr1

MEACTRYATTAFISGVIWNFLPLGPFRRWVYWIGSLKHRMDLHRATSYLLPIVEERMAKESTSDKKP  
VDAIQWMIDMPPTSLSELDARRHSYRILHLTFACTGTSISLTQHLLIWQILLFPEYLA PMREEIKGALA  
EYGGWISDKALSHMPLLD SFIRETLRMHPPGVCKSDSPVLTITSTEAKSLVGGARTVMQKPYTFHDG  
LSLAPGARIAFAVLSTNLD PDNYDDSQKFKGFRFAGPEVSSESQARVSAATIDEKFLS\*

>CYP613-fragment1|119548|Acastr1

MELVNL R D P I P E Q V E K Q N F F N L Q V R G Q Y A Q Y R C L S K P E H V Q I Y Y R D S N R H T K A I N N N S G W L F G E V  
L G V C V G L V S H A Q W T R L R R H V E K P F S H P S A A S Y T G A I R Q S R E F I D D L P L K A P N F Q Q N H T I N P A D D L  
K L F P F F V V A N I F F G N L S P E Q K K S L S E L A P L R E E L F K E V I K G G I N R A A L S R Y L P T R G N R L L S A F Q E R W G  
N F T Q N A Y D E A K R K G A D V P I V S L W E A S L E G F I T K R E C L Q T L D E S L Y A N L D V T T S A T S W N Q I L L A Q N P  
T A Q D E L R R E V L R F R N D S S D D I Y Q Q Y L N R G D T F L A A C I L E A S R L R P I L P F S N P E S S T E N R E I G G Y V I P R N  
K N K T D V I V D S Y A I N I D N P F W V N G S Q Y N P F S A M A N T S D G A N S A D S V A Q L V H L L E S L N G K V E E V L Q Q  
L E S P K F T T L L D E K L H N P D H L P D R Q L E V M S S Q V V D S M D K L Q L R L V P S V M L L A D G F F G Y L F S K A L W T V  
V D A K V P D V L D E K G P L S A A E V G L L V G I Q P K R L S Q L L D T L I N N G I F L Y D S N T N R Y S S N R T S R L L C R D H W  
T Q W H L W A D L Y P N D F F D I S R S M P Q A V K I G E A R N A Y Q I E H D T K K N M F V H L S E Q G K I E K F H N T L G A G  
A V A Q A Q G F S I D Y P W D E I G S E H F I D I G G G S G A F L A S I L R E H P K M T G S L L D L Q H V V D A I T P E F R Q P T G K F  
F D V G A Q V R N L L V G D F L K H V P P A S V Y T M K W C L H D W S D V D V N I L K N V R R S I V P S A V A R F V I L E S V K  
Q Q G R S G R L P R Y G D L I M M I T V N G E E R S R S D W E R L A Q S S G W R V E Q I V Y L R R A W P C A I D L R P T W S \*

>CYP630-fragment1|119577|Acastr1

M N E W L A P R S Q L P R M S P C Y G S A V R V G L G L R V V S P A V E D L Q P H V K A V S E D V E A Q P R L E R H C P S P R H A  
T P E R Y Q A G E K L D D F F S A L M E D K E G N P N N L E W G E I V A E I A I M M N A G S V R H L P Y L C A C L D E A M R L L P  
P S T F G L P R R T P E G T T I F D T F I P G N T S V S I S A Y V A H R D P T V F P D P E T F R P A R W L K E G A K E L Q P Y F I T F S A  
R A R G C I G R N I S Y L E Q T V L L A S V L H R C E L R L P Y D G W E H E R W Q A F N L S P R E M P V K V Y N R D F A K V L H I T  
Q H V N E A K R A V E G K S T F W L I K Q L Y V V P S N L R A L I A A C G L M A I S Q P G G F N S L M Y Y S S N L F G I V G F S N P  
V T V G T L I A G T I F I T W G F L M L V D R I G R R R I L L C T M W A M A L F L A L A A I C F H W I P V H Q D L I F V N A K V S W  
P A D V V L V C M A F Y V A F Y S S G M G N T A W L S S E F F P M E T R A L G T M M L T C T C W G S N V I V A S T F V P Q M E N  
T T P S G A F G S K P P S A S L A G L S F I S A T P K L R A \*

>CYP51188A-fragment1|120821|Acastr1

M L T S H Y L P H W T D R F V V P G I L A L G G A M K K L S S Y L T L E V E Q R L R D M Q E G R K D I P R D G I T W V I E A S T T E  
D Q R A V R R I V Q Q V I S V F F A S A H Q L P V L L M F S I Y R L C E H P E Y T K F L L N E I E A M L K L P T T D H Y K H L P L M E S  
F L R E A A R H D P L D S L S V Q R K V L K D F K F S N G S Y V P A G N V I C V P Q Q A V M R D P K Y Y D R P D E F L P F R F V R E  
H G D G Q D D G P V Q K F T D L K P H F Y L W G A A A K P C P G R W Y A S A V M Q Q F F A H L L T K Y N F K L A D P N A S L T  
F T Y T T I V F P R P R L E I L L Q E R \*

>CYP5148B-fragment2|121991|Acastr1

M V P V N P Q L I P T T M Q R R G K K L H Q D L V K T Y G G L V N G I K Q R L D G G A A V E D C L A K S M L H D A G E E G L D  
D L D M S I L A S A F M V G G V E T T A A I M Q W F S A I I P A Y P D I Q R K A Q E E L D R V V G R S R L P G I E D E K N L P Y C H A  
I I K E V R I P I T T L S V T L V E R C R N P F W L G T P H F T T E D S I Y N G H F I P K D T V V V L N T W T M H H N S E R Y P D P K A  
F N P D R Y I N D P L T S A D S A N L A N P N D R D H W M F G A G R R I C P G M L V A E R E I W L T I A R M L W A F D M T E V P  
G E R I D L N E Y D G L S G R S P M P F R I N I K P R D A E V E K V L K R E S G R W A V C A \*

>CYP5082-fragment1|127117|Acastr1

M S C G G N M D G L D A G E A L N S L S W Q N S A G V M L S E M M E M A G Y H L Q S Q R S H L D F F A R H V A P A L G S H P  
E I D R K P P P W R S F M T D D G S P I E L S W S W S V Q E P A P I V R Y S I E P I G D R A G L C P D Y F N T H T S N E L V H I I Q R S Y  
Q G V D L T G Y A H F F K E L V V C G E G T F V P K I T K E D G S N S Q I F L A F D L L D E K I M L K V Y F L P A L R A R E T G Q C K  
L S M V E K A I S T L S P H G Q S L S G A F S L V C E Y I R S L K V G N R P E I E I I A V D C V N P T L S R V K V Y L R S R E T S F A S V V  
S M M T L G G R L K E L S K E G F A T L E E L W R L V L S L D P T I S T E P L H L N N R R T A G I L Y Y F E L Q P S R S Y P K P K V Y I  
P V K H Y G K S D L K V A N G L S S Y L K E K G K R L N G M D Y R D A L Q R L C K H R P L D Q G S G L H T Y V A C A I E D I S L A  
V T A Y I N P E I Y H R P R A G P Q T G H Q H I A Q G T S T S R N V A H E S V T V L K L K A K E F Q H G F K I D A G L Q A R T K S  
A N G G W Y F H Q L L G E C M G L V N G T R W R N L K S E F D L S F S H R A V L Q R S V D I E G E A C R F L R K L E I H H G Q E P  
F T L N A S N A F M T F P F F C T S H L L Y G P M T E S E R D R L W S I G Q T R L A L M R H V I K G G I M R Y K A C K W L T S T A V  
T E L S L F Q K E W A V F N R D M Y R S R M E L D P P P P I V S L K R S E T E G K L S K V E S L G K I L Q T L D E M L F A N L D V T T

HVLTWLITLLADKESTQQKLRDEIRNVQGRPDVYCNRKDTFLHFCLMEAIRLRPPAGIGFLLTQSDG  
ER\*

>CYP65-fragment2|1800|Clagr3

MPQGHRSAAARTGWFERDPNLHPTLPGRAHSLIHVLRCAHLSAEKALREQESLIQSHIDLLIARLHTE  
INSPNNGVVDMVQWLTFTITFDIISDLAFGKSFNCVKEGPHPWVELILDFMRKVAYLAALGYLPTPIF  
KMIISTLQYFMLEEIQKGNEYVDRSVAIRLEQGTSRKDFVSPILELVSHGRNSSKQSG\*

>CYP51164A-fragment1|3613|Clagr3

MSLRDALHDPTIYSSPLSFDPSRWLTTPDAEKKLMDMAFLPFNKGPRIKPMPHSYVPPTYPLHSDGS  
PSAIPFNNLGSRRGSEIQLTDGSLAFANIYHVLSALFRRFDLELVDTIRERDVMARDKFISKPVKES  
KGVCVRVVGAEI\*

>CYP5069-fragment1|6212|Clagr3

MPTQAMRTKTITPSERVENGLFLAVANLIWGYDFRLPLGKDGKESSMDLSDEAFLDGAIRIPKPYEV  
RIIRNPERLALVKSTWKRAKEEGYVMRGLTVTESEGIAVNEKLKLDGTDKRTLNAFQEDVRLPTG  
VLYCSYQVPT\*

>CYP682AZ-fragment1|10834|Clagr3

MCSVVSLLLYTAYGVYIRLYFSPIAQFPGPKLAALTFWYEFYFEVFWSIHLISPTGPIVHINPYKLHVT  
DPTFANMLYPTSAKNVERWSWSAGMFGSTEMTFGTGVGHMLHRRRRRGAFFSHFFSKASVRRLEPLIQ  
TLVDKLCEKLSQYTDTREPVNMVHAYSALTQDVITEYCFSECRNVLEMENFLPWYYDLVQKPCELC  
QMFVPSSIAITRSS\*

>CYP548-fragment1|1786|Clagr3

MRRIRLLCCLTCYLPDYSAPSREVPRPTSRSDDGAISTVAVNCRGPTPDVLETKDDIWLQGECSEIELV  
PRVSSEGRMERLDMHRQSSPCSRTLAHAFSDTALRDIEHYVTSNVQIFCDQLFSKDAKHQTEWGH  
ALNMSSMSNYLNFIDILAEFCFGKGSFRMLTESNHRHVVDLMLHSAWRGMICGTLPPVHDLRLDK  
LFFPTLARDRQRYKNFSKSLAVERTKQGEDDDRKDFFHYFLNARDPETGLGFSTPELWAESNLSIIA  
GNIPTGTTVGTGFYSLHQNPQYFHGPFYSYKPERWIVGSSAEVTAESAELAQCFFPFSGPRGCIGRN  
LAYMELRSVIARTVWLYEMGLAPGSMVGNVEAGAEDRRRQEFRLDRWQAEKDGPMMQFKWRV  
RQKHRMMFSGKQVKM\*

>CYP65-fragment4|1799|Clagr3

GSATTNTLLSGALYHLLTHDSILQSLLAELHSAFPSTGVSMAAVGSLPYLNAVLEESLRVYPPSAH  
GHQRIVPHGGATICGKVVPEGTSVGVATLAASLSERNWTEPLAFKPERWLGEAWAGDDYKSFQPF  
LVGPRNCLGKNLAYAEMRLILARLLLEFDFELCEESREWYKDQKFHFLWAMPPLKLRLRERAF\*

>CYP5570-fragment1|4546|Clagr3

MGDITFSRNPVLRHDENRHVVEELPKGVVGIHLTEQTGHMPWLLKCGLDRLLFNDFIRGITPLKF  
LSEFAEWRVTQGDSDLGRDLFAALLDAKVSQTGRGLDLKDLISEAALFIVEGSDTTITANTTTISYLL  
HYPNTLERLQRELRTKFKDAEDIRMGTDLASCTYLPACIDESMRLANPIGSLLPRETLPGGLKIDGE  
WFPPGIDVGVPHYTLHHNEEFFPDPEFRPERWLPMDKRSQTRAESFTTSTTAKEATLDMDLEVAQ  
SAFMPFSIGRTSCIGKYLAYQEISLIARTVWQYDMRIQPGSTVGEHSGLEWGRKRKNEFQLQDRF  
GNPKIGPLFCHAWKPWHLWRYEAHLCVMGLSTD\*

>CYP5406A-fragment1|7175|Clagr3

MGWGVTRKKVFNILLWITSQTLENKVSDEKPVQTQGHITQWTAEMTRLRDAAAVAKITLGILFASA  
FQVPMLAQFCIYNFCKHPEFYERLRAEAVECKDTSFGSLNQETPYLDSFMKETARLSPGPILSAPRTV  
MVPYTSPDCYHIPTGNWLAIPQLSLMRDESIWSHAFAFDGFRFVNEKDGTSKSRLTHPSYEFPPWGS  
IRHACPARFYVSVVMKMILSHLLIDYEIKLADPTARPFLTLSKMRLPSLFMTILLRRRGVTGDDKSDQ  
AATEKAD\*

>CYP6789A-fragment1|8063|Clagr3

MPYFMACVHETLRLSPPIALPRHPPTGGIYVNGEWISEKAKLGANPYVIHRSTKIFGSDADTFRPE  
RWLGDHEQVRLMHKFSLAFGYGSRKCLGKNIALFESQKFCACLPRDFDTRSCSPERPFEAQNWGV  
NVYSGQYLKLTTRTKRSDGTSQ\*

>CYP5042-fragment1|8898|Clagr3

MYLALSTISAGNEDAMYLALSTISAGSDSTRIPMNALVAAAALCHLDAMRKAREEADAVCGNSAGR  
LPGTGDMHKMPFTCALLKEVLRWRPPIPLVPPHQLTQDLEFEGYYFPAGTEFVINSFPVAHDIDAPE  
AFYPERWMGDNEASIIQGLWVCGGGRICVGYKLAQTQLFVAYARLLYCFDYAAAGEFNMRIGYT  
SLEEPISSEGHGP\*

>CYP65-fragment5|10067|Clagr3

MEITRPDFMSFIMRHQDEKGMSEIKIQRTLNSLMVAESETSATTLSSTTALLIKHPEKMKKLMNEGR  
GAFKRDETTFEAVYNCPYLI AVLKESLLLYPLVPTGFPPLVDPEGGNVISGYWVSGKEHPRSSRQAM  
QVITHDTMFRSGPQIVLAVTLSFQILSLRSAGLATHDMPMTTSLCSTHDHIGRGIVLPAFETRLFMAK  
VNWNFDVEVHMDAASNWFDQNGFTL\*

>CYP682AZ-fragment2|10833|Clagr3

MHDDPSIFPEPRMFDPRRWIGPERDIRQKYLNFNFRGARQCVGMNLAEAEMHMALAAVFRKLGR  
QMELYDTERERDVRHDFVTNPNLDSRGVVTSA GDERFARSLMRMEFERARHKPTTEPNAARD  
EL\*

>CYP52-fragment1|10873|Clagr3

MLSWQVGIQLHVFFRRPLPINMRQACKDTVLLVSGSPDRKAPILVRKGVAVSYCVYAMQRRRDLY  
GEDVNEFRPDRWDANEASERDLRNKNLGYLPFNNGGPRSALEFAILEASYTIVRPLQPYQTISVGEE  
ETEDEQTHPRHTITLVVASAKGYNVRLGV\*

>CYP-fragment1|11111|Clagr3

MSQSACIKEAIRMTSPVSSRLPFTLPTLVYTFSAVKDDMGRSQTYEIPPETNMGMSPRLMLYNAEV  
YPDPECFGHSRWLNENISPSKAQGDGRMLKPARQTDLKAMEHSFKAFCGGGPRRCIGMNLAYASL  
YYILAAVVRFDLEITDAVRARDVDMNRDNFSSVIARGREAVRVRVVGDEAENVQ\*

>CYP5095-fragment2|5456|Clagr3

MTSMFTSTPPAPFLTSHKGKIVRIKPRDVBHIDDPEDFETIYTPSAPYSKLEFFENRFNMPQATFATADF  
HLHKL LPDSHAYKPERWLDNPKAPDGVKSLSRYMVAFGRGSRMCLGMPMAYAGVCITLATLMRR  
FKFSLFETGSENVFVWQDFVMPQPKLGS LGVRVLIN\*

>CYP5168-fragment2|298|Dibbae1

MDTLEQDKLMLNGDDVTMIAGGILNAHRSSKRTSGLDQAESTDNFYELKKLPRLNGIVNETLRLH  
PAVPTGGLRDTPNKALKFLVYLHQEISRYVLQSTP\*

>CYP5095-fragment1|1169|Dibbae1

MDKLCEPLEKEYAGTGKILTINDMWGYWTPDIIVGYCFERFYEFIWQPNFRAFFTAMIDLLETVHF  
VTQFPSIIHMNRMPASWIKFLQSGMASVIQFNKQMEDQIAEILRCPNAGEEMVSQDTVFSAILQSDL  
PPEEVS LVLLQHEAISVVGAGIETT LRLSVAGFH\*

>CYP631C-fragment1|6185|Dibbae1

MHVFRKAPAYIHHLRFPLSRRTGKYLSSVTVLGHYLPAGTVVGGSPYVANRHKPTFGQDAEFWRFE  
RWLEKDAAHKKELE\*

>CYP5129-fragment1|6190|Dibbae1

MANPTRFTRVIPDSSRGLHIGPIHVPPGTPIGCAAYTLHHGASIFADPSAFRLERWLEDDRLDMEK  
SMMPFKG\*

>CYP5369-fragment1|6630|Dibbae1

MIKEGSTLPKKLPKDGVPQELPKFTKLKFSMDGLAGGWIPYGGGPFMCPRHF AKQESIGSFAVF  
WANYEAE LQTPSGFCPEPGMKFFVLGALPPKDRTPFRVTRPSAWKA\*

>CYP682-fragment3|7518|Dibbae1

MFTLINIVQSYCLALAVIALSYATGAVVYRLYKSITVSSNRALQGDCKDAPELARDMAETRPVVEMI  
YDELYSGPGTRRDKSVFMFRALGSTRSMHLTAKHDVHRIRRAGSNSYFSKRLINHLEPVFQLLASKL  
QSRVQEFRHSKQPPILNHAF AAPSTDGIITLYSFGKSYNELEKPEFADGDVQDYSRFGWDDS\*

>CYP65-fragment9|9026|Dibbae1

MEEVLRTFGAGSSHISKAVATLGLLLLTSTRLAFVRS LRKGYLAHDIQKVHKRYGHIVRIAPDDISFA  
RADAWNGIHAHRPGHSPFPKNPVWFAPTPEQPSSLIANITDHARKRRILKHSVTEKALRAQTPIIN  
SYVDLLI IKLTEKIAASDAKKSQHCAGHSAMVQLYDI\*

>CYP65-fragment6|10330|Dibbae1

MPGKDIYVQKPGQATFPKYPSRYGKWMWIKGALDIFSAENEADHAQLRRLIPAFSDIAIGELEAL  
VQKNVDILVRKRVTDSAVKGRVDMSA\*

>CYP542-fragment1|10990|Dibbae1

MKSQVQEIHENKTSIKQQLDTRSTIFEELVFSKELPEREKSIDRLFQEGQTVVAAGTETTAWASSVIIF  
YLLTNRDKLLKLYAELFQLMPSPEKILPPTSVEHLPYLIRLPLRKDRF\*

>CYP50334-fragment1|11141|Dibbae1

MITAEALRLYLPLVRRIEREVGEDGLGEPIIATLNPYSEPSWVWGDEALHLRPSRWINLSREALQHYM  
AFGGKPYTCPAIDNFGPKMIGLLVAALWKSLEEWNPNLQRTTRLILDWQVESFWDDFRDEAQLQ  
REGMLIIP\*

>CYP6716-fragment1|12561|Dibbae1

MVLFLKAYLATLLGVLSHLGFHLHGEHLYAPRIFRLYASLPPIAVLLQIGAGTSIRDASVKSLLLVL  
YAVGLFGSILLYRIMFHPLRNFPGPMAKTTKLWNTVHTFNSKNYLLMDGLYRQYGDFIGPNEITLF  
RAEAVRALDGLGSKCSKAPWYDIMKPRVSVATTRDKTVHSKRRKIWQKAFSTQGEWS\*

>CYP573-fragment1|1691|Dibbae1

MKRSPKKSRTDILHFLETRTWEEDLLHLTFVKVEAVLIVIAGADTTATSKWKTEIDDVTAAGNLSAI  
TQYDGVLEHCSYYVPRIRKTRRLYSPVNTFPRLVSKGGITLGGKLVragMEVTIHAWVVRDAAL  
YDPDANAFEPERWLNDSVSTVKQFNKYDITFEYGNRRLGEGYGVYGVV\*

>CYP540-fragment1|3289|Dibbae1

MFSQSFAGFTTTSSLMSWVIYCLATHEGMQDRLLQELIDQRHQWRHRLHTRIITLFLSLISSRKKS  
GAYIIPHSSLPALQKPTASFPIPAGSVLTAALHHIHNPNALWDNPTQFNPDRWDTEKVKNRHKHS  
HIPFAAGPRSCIAFNFALQEVKILIAELAYRYQFEKTGEELVDLMRPMNLYVWAKNDQTGLMEPKV  
QKEFGFALL\*

>CYP5472C-fragment1|3550|Dibbae1

MSDLHKLKYIKMVIKETLRDHHPCKESMVTDLPEAKYLTVGFNARVPIKDITLPRGGGPDGKSPIAV  
LKGTQIYGLLSLQHRSDLGVEDVNVWRPERWETWKPNSQWEYVPFNHGPICIGQQFANFQMEY  
FLARLCQEFESVTLLPESPSQEGLVKLELNTKMAHPVYAKCVRRAV\*

>CYP5042B-fragment3|5583|Dibbae1

MVSPSLSIFQLDSTNSIGISSIVDFPQLASIPILFQLWRRHWEETGQFHDAFQTRWKPVKRAIAHG  
IAPPSFLRDVLLHKDTKYSGDDEEAMYMATSIIAAGGDNTRMAMNTFVMAALCYPDVFERRAKDEI  
DKVCSPIGKAKRLLRLVDMAKLPYICAMVKETLRWRPSVPLIPERQLTQDLEFERYWFPKGTNFVIN  
CVAVSRECEEPDIFKPERWLDGTESSIIHGLWQFGGGRAYLAWL\*

>CYP5091-fragment1|5965|Dibbae1

MPIVEKRLTSRHRDTYNSPTDKSMDCMQWLIETSPLSNPWTAEARMISEILAIWFSSVHQLAMSTVFA  
IEDLCAFFEYSDTLRREAAAMQSVTPDGLPLDSFLKESARFTSVDAVTCRRKALTSFKFSGLSIAQG  
DWVCIPQQAMMHDPLHFRDPLKFDGFRFVQERGGEDIVAHSSKASLFTDTSLDWLWVGLGKTVW  
YDH\*

>CYP5947-fragment1|6921|Dibbae1

MTFCKAAIDPTIFPEPYAFRPQRWIDGSQKQFDYERYVLPFGRGSRICIGHCVLSLSYAQLYILLAGI  
FRRVDMELFETIRERDIEIRGGGPLGEPSRKTKGVRVRVIGIVP\*

>CYP65-fragment10|7702|Dibbae1

MTYLLLTQPSAYQKVENEVNRAFQMIEEINGTTLLELPYLQACINESFRMHSPAMIGSARRISQSGGI  
AGHWVPAGTGVQMNVYACGRSSLHWRDPDSFLSERWLGDEKYKDDRRDALQPFSYGGLGTALE  
DSKFSIHNDVSALGVPEFSPTLVFLLALLWPRFA\*

>CYP6389-fragment1|7805|Dibbae1

MTSLPIREKYYSSVKVDCLQWIIDSSPRKRTWTTEKIIQEFLALWFGSVHQMAMSFVYALYDLCAHP  
EYIEPLRYEVEKQVQNQWVDSLENMPVLDSFLRESSRMNPSDAISVRRKVMKTFAFSDGSQIPIGNW  
ACVPQKVMMRDPQIYVEPDTFNGFRFISTDNDNNEGKLERSSSTLFTKADAEEFPFWGLGSHTCPR  
FYASAAIKLLMAHILLTYDIKFANEQQKRTFSWRTAIVPVSTVAILFKKR\*

>CYP5127A-fragment1|8623|Dibbae1

MHSALDYIEDTLKTAEVVRLLPKFITPFVGEALAAARLSSHAAYVNGLLPIAEQRLQEKTLEKLGQKV  
EKHHDCIQWIMETSPKQNPWSAQRIVHELMAIWFGSVHALSTTISFAIHDLC LHPEYVEPIRKELESP

QYTAFEQTAQGLPLLDSEFIKESARLTPVESMSTRRHTLQPFSLSDGTKVDVGDWLCTPVRAMMQNS  
EHYPQPLEFNGFRFANPALLDNATSPAFKFPQLDSPSKLTDVSESWHVWGTGRMAW\*

>CYP65-fragment1|9025|Dibbae1

MKVALEHFQLAIDRVNQRVNSESRRDEFMTNVLKFNESEGKGINDNGGDTRNEIRSFakeEELTLD  
SIQNLTYNFNAVLEQGLRLCPPVAAGIPRVVPPGGDTVCGKWLPENQFQSTNGLYPLLLDGSQAQRN  
LKPGRWLRDPPPEFASDQREASQPFVGVGPRSYIGKRLACAEMRLVFARLLWNFDISIPLEEQSVLSW  
ASQKTCVLVEKQPFVRLKNIRERSWEP\*

>CYP5042B-fragment1|9198|Dibbae1

MFVVGASLILFLLCGFVIRERLKPVDKRWLRGRRWKLPHGPGVPILGNMLQFFEARDTGGLTL  
YLQSLRSYGEMTTLHMGSHTWVLLNTGYVASEIIAKRAKVTNERPYMPIAGGLVSNKRAVIRQA  
AEWAEGRRVIHLLSGSALKLYGEWQELESVQLLSYLNENPENWYAHHFRYSTAIFYRIVMGERLF  
KSQEQLDNYQKVTMEFLFSLFRSPIDFFPTMDDLPIQLQFWR\*

>CYP5042B-fragment2|9199|Dibbae1

MGRFHRRIFQEWWTPIRAAVVDGTAGASFVRDVLLHPDVRFVGDDEEAMYLATSVMAAGDNT  
PCAIRQSTTRARAEIESVVEVGDTTRLNMEHMASMPYLCAVIKEILRWRTVPLIPPHQLTEELEYG  
DYIFPPGTDLINTVAICSECEAADEFKPERWLDGNEGNIHNFWGFGGGRRIYVGHKVQVQALFM  
AIGRLIYCYDITPNHFPSKAYGARDMRAQYLQRLQNVD\*

>CYP5571B1-fragment1|9922|Dibbae1

MAITKPASKFIKDATYYVVGIGFPEATFGMIDPVQHRIRKQVLTAFSAAHVQEIAPIGARVESMCK  
AFDKHAVTSEPLNIAAALKAFALDVISEEVAGQDYGALQYPCFRHPKLGVMRECIEGAWICRAFPT  
ASRISLALPTAVTSPFFKIPMVEVIKTARSGLDQYLQDRDEGLLEGMNISNAKVTNTQKTMVSSRRK  
VSIPIERLLDPTSADHKVPDASHSLNLEILMLLGGGNDSTSNMIFGVYICKYTEVQKRLEELRAA  
YPIPGQTISYTTVKHLPYLKGNFYRREYIY\*

>CYP5042B-fragment4|10072|Dibbae1

MGVDHYKVFWWWDPVMQDMAGGVAPPSFTRDVILQSNNGKYATNSDEAMYLATSIVAAGSDNV  
RMAHNVFMMAAVCHPEVMAKARTEIDSVCGPDANRLPNLADMESLPYISAILKECLRWRPVPLI  
PQHSTKEIHFDGDFVFPAGTDFVINSLAVCGEVDDPADFKPERWGNREMNITDGL\*

>CYP676-fragment1|10380|Dibbae1

MPDSSWANQMSELQAQKFSVTQKKIAGGYALSNVIKAEPELDQAIQCFQYQIDRLIGAGRFINLDV  
WFTYFAFDVVGQITFSQEFGLQQGKDVGKCIATSHILVPYLSIMAHFYQYHDLIMSNTIMAWLDL  
QPMKHVMETTVAIQERERNNGNSRIDMIEHWKSHSEPLTDKEILSTASANVAAGADTVASELQAF  
VYLLLRHPDCLRLCLRAELDAAALNHRISVPAQYNAVQDLPYFQACVSYSVERYMKRVSDIASFQLK  
ETYRFHPVSATSYPRVTPKEGIEIAGRYFPGSVRKSTSFGLAQALLDCY\*

>CYP6544-fragment1|10725|Dibbae1

MNAQHVLINAGTTAFFGETFLKSDPNLLRNFIHFDNNDNMVWYKWLDATLMRTPKAKVLKTL  
RLTSLWNEVLRLTNSSAAVRTILQPTCVGGKILKAGHKVMSFPRQLHFNEEVFGKNINDCDPDRFF  
RNRSLAKDASFPGGGSTFCPGRFIARQEVFVFIALLVHRFDVEMAPVGDVEKGRQAFPKLESKKP  
TTRIMSPQTGEDLILKVRKASVI\*

>CYP51200A-fragment1|12560|Dibbae1

MLNILALSEYEGRLLYFADQLQQWVLRNNGATVNVSSLFYLYSFDVMSDLAFGEPLKMLECSDPHY  
AVYLLHSGMAFLGPFSSVPWLARIGFSIPGVAKDFKKLLGWSAKKLEYRLKIMSWLIEASRENGTM  
QEDQHWLRGDCFAIVVAGRSSDTVASTLTSIFYYIAASSEHAYKLRAEIDSLTSLTDIHALEQMHHL  
NGMINEALRLHPALPSRGLRVTPSDGLTIGGRYIPGGVTVAPRYSIGRLESSYEQGDKFIPERWYSK  
PEMVKDDSGFSPFSMGIEFSIYLENAVNKTCDATIA\*

>CYP52-fragment2|12644|Dibbae1

MGDLYWLFDNKEFRENCETHRFVDQFVDVALKRDKSTQKNQKFLHSLLEQTSRVEIRSELINLL  
LAGRDTTAGFLGWLFYILVRHQDIQSKLRSIILQDFGPYSHPKETLASLRECKYLQYCLHETRLRYPP  
VPVNFRQAVRDTTLPRGGGPDGTGKVVFVEGTQVNYTVYVLHRRKDIWGEDADEFRPEGWAERK  
FGWEYLPFNGGPRVCLGHPMLVTNDGVEQFAMTEVAYVAVRLLQRFDRMENRGDSGVVVKHNL  
SLNSSPFGVNVILHKAVERN\*

>CYP52-fragment3|12645|Dibbae1

MDSKLIIGVALTTFFFYLFHKLKRSQRLAAAAERLGCQPLRILHYRLLGAVDLIYELFNADRQKVLP  
QYLKERFARADATTFGHIFLDSKDIFTIDPRNLQAMLSTQFQDFCLGPTRRNSFVPFLGHGIFTEDGD  
AWERSRAMLRPHFSRSQISDLTLEETHVRNLTRALSVDDSGWTAPLDLQIFFFRFTLDLLLSSYLANL  
STLRVRV\*

>CYP6259-fragment2|12690|Dibbae1

MDLYSLQRDPKIWGTDAAEFPRPARWSDGRPLWEAKWQYELFFGGIRMCPAQQTQLLTQVAYLLVRF  
AQEFQSVEDWEEVFGYLERIAMMVESRNGIKIAVVPVEKK\*

>CYP5472C-fragment2|3549|Dibbae1

MLEEYNHTMELRMLGTRLIMTDDPENIKAIQDTQFWEVAKSEEQHQIFKHILGDAIFAMNGEEWK  
QEVALLYRAHMSRVRDSDFAVTERHLLNAFDLLAKEGNDGFDIIDRLQLDIVTEVFCGESTDSLTSQ  
QPFERNAMETLQKIASFRQLLGQVGVYLDKWIAPQAVKFIDDYQDAFAGKAFARTDANPVSGSIC  
LIDDLIQKGKTREDIKNAVSTLLAGKDPSTTTMAFGFYEIARHPDVYAKMKAEEVEEQ\*

>CYP52P-fragment1|4302|Dibbae1

MAILFGRPLERIQAKRGADEKQFAKDFDFAQHMLALRGRLGDLYWLLGGAEFKYSCKTVDHDFVD  
KIVLDALEEKKSTPEASNERYVFLNALIESKEIDPIAIRDQLVNILLAGRDTTACLLSWTFHLLARHQ  
DVQRELRSCLALPSFKESKLPTQAEIDGMKYLVHVVLRVLRLYPSVPINSREAFQATTLPGGGPDG  
QSPILIRKGEAVGYCPYVLRHRTDIYGADALSFRPSRWYEPSLKKVHRFAYIPFNEGPRICPGQKFAL  
LEASYTVIRLLQSYQHIEPAVDSLVDKQTVTLVVQNANGCRVRLTPYSK\*

>CYP680-fragment1|6558|Dibbae1

MFNYESNKAHRIRRAVFDPLFSRRTVLLLESVVQSHVSKLLNKVKALKTKGETISLHRAYACVSVDV  
ITEYATNQCWNVMDKEDFGDEFFRMIDTLGKGIWLLKQFPFLKFMTALPPNIARLLSKEAGGVGDL  
IEDCKREVRRIAATWSKEEKEKLEHKTIFHQLLDPEAETGHVVPVSNEMAAEAFVVAASGTTGN  
ALEMTTMGILEDPKIYKRVMEELTSAPFDGEAMAWQEIEKCEYLTACINEGLRLTYGVIGRLPRKVP  
DEGVVFYNYHLPKGSVISLSTIFIHNDESIYPDNKKFNPDRWINPTRPNLKKYLVFSPRASPGANYMS  
HWDDSYATVT\*

>CYP52K-fragment2|9168|Dibbae1

MSSAKGRAVDLQPLFFRLTLDTTTAFLFGESVLSLKASDREERFEGAFNTAQRYVAKRFRLLDLYWL  
IGGKEFDKACRDIHNFADAILDRSLKPTNGNKSRSRYSYVFLDAIVKDCPDRMALRHQMMNILVAG  
RDTTACLLSWTFLLVRHPRVMDKVRKEIAAGIGDAENLHRTHLKSLEYLNNVIKETRLRYPSVPV  
NQKTSKTTTFPTGGGPDRQSPVLIPRGTSAYSVYSLHRRKDLYGEDAEDFRPERWEEELGLFRDE  
VTKTWGYLPFNGGPRICLGMDFALTEAAYTIVRMIQRFVPIKLPPNEPVVKTGKEKQIITLVISIKDGC  
NVVLE\*

>CYP6170-fragment1|1601|Grasr1

MQAASSGEAKKRSVDPSAFRGFGGGSTLCPGRHFSTTEILAVVIMFVIRYELRPAGGKWVFPITNKS  
NIASAVMEPDFDIEVEVRPTETHEGDWAFSLADSEMVFVVVAEDQAGRDS\*

>CYP6456-fragment1|5963|Grasr1

MDSLLLPIITFCTILFTYLLLDHLYIPKHLQPPEPLLRPKVPYIGHILGLLSHGSKYLQLTRHTLPLPPS  
PLPNIPPSSSQSNLYPIYTLPLVSTKIYIITSPDLISAVNRNSKTAFNPFIAQIGRRMTGHDEATSKIVQ  
HNLNGENGPYVTDVHDRTVAALAPGPDLEAMILPMVRGVGDGYLSGLKKEKERGNEVYLFARIR  
RLVTMCSTDAIYGVGNPFERDEGLGEMFW\*

>CYP548-fragment3|6661|Grasr1

MPSFYHAAEGDRRIWLWQNFQTYGDRVRVAPRTVVFNSSSEAYKDIYGYKANVTRAKPCGLNKL  
NAITPPNVKVYYRFIERSISKPWESLKQTKNRTKRRKPREDMFHYLCQAEHPNTGGPAYSEQELIAE  
GNLLFIAGSDTASLNRCGFFFCITHNERIYQKGPLRRFVAPSHLPARSSKASS\*

>CYP552-fragment2|7094|Grasr1

MSIQEFTATAMDYAARSYLITAVCIFGIYQIARCFYNLFLHPLRHIPGPKLAAATYIPEFYHDVVRYG  
RYTNRIKEMHDRVYRISPDETHCCDSRFIDEIYATGNRKRDKPIHQVRGSGTVETAIFSTVNNDIHR  
MRRNALAKYFSRAQIVKLEPRLHGLAERLCDKILSLGEKAPFNVTAYSLSSDVISGYCFGESIGLV  
AQQGWEPSSLREPLYALLGAMYLLRFIPPLKYIGLAMSE\*



>CYP5180F-fragment2|7697|Grascr1

MKALDYESIAEMPILDSFIKESVRLNPLDKMSIRRKALKPYTFVNGGYQVALGEIACAPAWELMHN  
EAKYPNANSFDGLRFVKQAENVTKSGTQDETMTGTTFTDASKDFPIWGLGSKVWYANCSTFLRER  
RFAARTLLTETQSRPMACVTSHEDGDRASSGKL\*

>CYP50112A-fragment1|8029|Grascr1

MTVTKQSRMEMTKSLYDKYGRTWQSSSFGKAIINTIDPLNIQSVMAHDFDSWGLESRMYPAAAPF  
MGRGVFTSDAPFWQHARAQVKPI\*

>CYP5285-fragment1|8876|Grascr1

MRRFILRPMTLSDGTTLSGCSVAAPTQAVNLDPVWDKPHEFDGFRFEKLRESEGKNAFQFSSSR  
EIKFAGDRSERPVNQCNGLNGPDPAVMALFKSRKGDSE\*

>CYP5285-fragment2|8877|Grascr1

MDAMGSISSLNKKQDQALALSFIALLSGLAAILVWRTPSQSRKKVPVFGQGTEDLTHPLLDGYN  
KHPHSVFELATSDFTLIVPRRIIREIGSMPEKSLSLDREVYERLMGKYTRLVKSSHFTNFVKLRILKNP  
KKAVKLLQEEAEWALDVSVGDVDDWKPNGVSQIVLKVVSLQLGHSFVGYPLCRDQNWMLAIQ  
YAMKTVAVANKMMSYHWLQRPFIWFTPEIAQLRSQFKEASVLEHFLKKRLEQCSDPGFEKPDD  
LMQWLIESILEQRGDLQLHTGIQMEAVQAGTFNLSFQVCLSR\*

>CYP5105E-fragment1|9549|Grascr1

MTSAINNPSKWELLPTLLFEPANIVIA TEIWHELSIGLMLXXXXXXXXXXXXXXXXXXXXXXXXXGLSPL  
AKIPGPKLAALTSWYEIYYDIILPAQYVWIKEMHTKYGPVIRVTPWEIHSDPTFLDEIYAGASNR  
GKYEFLRLTPVPMMSGGARTHDLHRRRREALNLFFSQKRNVNLESNIKTGGQLAEVFETHRKA  
RTIVNLYNIYYAFANEYNPLPLPKRNRDSLMAAASSCNIASDKTTISGNPVFRVTFRDPLQR\*

>CYP5168-fragment3|11212|Grascr1

MIRDKRAFSPSSQGTIFPRIPIDSNSETQTLTVNGTGRYNCVGKQLAMMELRYVVALLVRRFHVAF  
PGEDGHRVEAEMKDQFAAAPGHVQLTFTRRKDKVNIGPCIP\*

>CYP503-fragment1|11214|Grascr1

MLERKNAENKRSRNDMLQWMLDSARGEDADPDMLIRRMFLNMA SIDTTTTLTATNVILDLLDRP  
EYMESLRSELLESIEANKGINQ GALNQA HKTDSFMKEA\*

>CYP548-fragment2|11878|Grascr1

RWIVSSSGFDVAGGTDIGNAASVTLDRSAFCASFSSGPWGCAGKGIA YKEIGLIVARLVWLYEWRIAE  
GTHVGEGNPALGETTLRNHV KELQGKDRFVLCTDGPIVQFKARK

>CYP65V-fragment2|12099|Grascr1

MLDLHNKYGEVVRIGPDELAFSNPAAWKDVYGHRTTGDDFAKQMRFYRPVEAEKINIVNAGRE  
EHSMLRRQLAHGFSDKSMHDQESLIGSYIDLLIKRLHENCAGGSKPADLNAWYNFTTDFDIIGDLAF  
GEPFGCLSSSDYHPWVKMIFATAQIGTFLQSAGYYPRLKSLLLRMPNSMKEKRKHHLDTKAKLL  
RRMEAGSRPDLIEGLLKKKDEWVSNKSCTTLRT\*

>CYP611B-fragment1|1600|Grascr1

MSFYKILQPSLAPGPALDAMNRIMIQNVAASLEKLSDANSRLHRIELSKWLRHKVTMATTNAVY  
GPMNPFKDPEIENAFWDFEDFTMILMNNMPSITAKKGHRARELMAAAFDSYFRQKHHEKGSILVQ  
NRYKNSAENKIPINDIARYEVGGSIAILVNITPAAFWSLLYYAHEDVLSAVREETASILTTSSSSAGKP  
VRSLDITKVKTHCRLLTSVFIEVLRQKTSGISVRKVMHDTMLDGKLLKAGKTLLMPARVLHTDANV  
\*

>CYP596B-fragment1|1637|Grascr1

MAFTDVP SGFTLVSDIRTNHSMATAWHTIKLKPEITHLVARLSSRVFLGKDL CRNERWLEITKGYTIDS  
FAGAYILRLFP AITRPVHWFIPHLRRLKA IKDAHN LIDPEVERRRARVQKALDAGQKPKVSDTI  
GWMHEVSRGRKVDYVAGQLSLSLAAIHTTTEVTQALFDICEHPEVVQPLRDEIIQVISEHGWAKTS  
LYKLKFMDSFLKESQRINSMSEGS MNRSVEEDLELSDGT VLPKGSRLVASKFMDPQTYPEPGKFDA  
ERFLKKRQEPGQENNFQFVSTSPEHILFGHGMHACPRFFAANEIKIALCHLLLKYDWSFPLGVTKP  
KYRLFETVLSATQDSEVLLRRRQEITL\*

>CYP6702-fragment1|3803|Grascr1

MNKLMOPLITERMAAMKAGKDVPSDMTTWNIQNARPHVKFDPEWQAHAQLLVSLAAIHSTTTMT  
SSHTFLDLAAHPECITELRAEIEEVLKSEPEGILGKTSMPKLLKLSFIKESQRINPLGMTTFDRKVTSD  
LTLPGDTLLPKGTIITVATDEIAHDPNHFKDPYTFDPFRFSKLRTEPGNGNKYQFVTTGVESMHFGH  
GKHSCPGRFFAANEIKLFLVHLIMGFDVKLPEGEGRPRNIEGMSGNRPDHSPILLRRRDVKW\*

>CYP65-fragment8|3919|Grasr1

MSRQMSRREILTNSNLIVAGSETTASALAGVTYLLKHPEKMAKAVSEVRSTFSIEKEITMLRINGLE  
YIAACCEETLRMYPTVPIGLPREVPSPGATVCGQFVPAKTAVAMTHLATYRSATNFKDPDSFVPER  
WMNDAHLAYTELKWILTRVLWNFDLKLMEGEDWMDQSHFMTWQRGPLMIQLSSRSIQ\*

>CYP51200A-fragment2|3921|Grasr1

MAATGITTGQSFTVLLHVYFSSVLASTFVYRTFFHPLKNFPGPFGAKVSKFWNVLKAYDSSNFRLMD  
SLYHEYGDFVRTGPNEIAVFRPEVIRVLDGPGTKCSKAPWYDILQPRVSLATTRDKILHDQRRKTWE  
QALAVYSFQDYEQRLLRFTEGLHAHIASRVMEGVDSKMFYYYSFDVMSDLAFGESLHMLVEDKN  
HFALRDTVASTLVISFWHLIDDAQQLAKLRRELDCEPDLASPTALQSLQHLNAINALRLHPALPS  
VESCETHAEKFIPERWYSKPDLIKDRSAFAPFSIGRYNCIGKRIALLQVRSVVARLIMHFDVAFAPDE  
DGIWVRDLKDQFNHSGQLKLVTARK\*

>CYP6259-fragment3|5938|Grasr1

MRLFLLAAPLTNPAQFLDTSTGFLFGKSTNSLAPQGDPEFNEFMAAFDRSLLGLALLITGPIRWPLY  
LDPIWKAAYTKVHTFVDSRIQAALVRKQKATDNGSTAHSGKYILLDEMASMSQDPYELRNQILNV  
FFPARDTAAIGFADIMFELARHPQEWKKLRQESLKYTKAIINETLRLHPAASRIGKCALRDTVLPKG  
GGIDEQSPLFVPKGRVIELDLYCVQRDPISWGHDADEFVPDRWIGDRPLWESK\*

>CYP655-fragment1|6199|Grasr1

MENCVLPSGGGESSKQPLFVEKGTEINMAFRSTHRACNIWGEDAAEFRPERWESDKWSVWQYAPF  
SAGARPCPAQQVALVDCGYVLARLAQTFMRIENRDLELKFIEERMAMQSRNGVLVALI\*

>CYP552-fragment1|7093|Grasr1

MPNRVKKAQAEKEAGIMQEDRTIFESVLASDLPPSEKSLRRLTDEATSLFAAGTETISWALAVITFHV  
LSKPDMLAKLTAEVTQAIDGSGQMPNWAEELEKLPYLTSTIYEGLRLSYGVASRTSRIPTGEDLVYRQ  
DWKPKGTLRIRSAERIRDRHVLCHNASR\*

>CYP5328-fragment3|7408|Grasr1

MVMNNSIFMMVAPPRLLSLPFVPKRWAQVGQATNDFRDYMMMSMLNEERRLSDEGKPGTGGLMT  
SLLRASESHKKSDMDGPKPLSVSEILGNVFVINFAQDQTANTLAYAIMLLPAHPEIQALIKVQSSET  
WEYDSLFPRLKRCQAVLTLNNGRMVSIHPSYVVPSSLAFHTHPRYWTPDPLTWPRPIRWITCPATE  
SINFSLDQRLEREEIVPMKGTYPWSDGSQYCLGKKFAQVEFVALPQSPGTAIA\*

>CYP5415-fragment1|7901|Grasr1

MHLRVAFKDITLPLGGGPSCTSPIFIPAGTRFEANFVALHRRKEIFGANVNSFRPSRWSEISPKPWEFI  
PFGGGPRVCVGKPKALAEAYFLCTLVRKFIEPRDWREWNGQVMITAKNVNGCLVGMIPAK\*

>CYP6334-fragment1|8006|Grasr1

MISFLRHQPQQRHRYPSDKSQVEKLREEQRNVLEDFFQQLQSLPHLNGVINETLRLYPVPTGGFR  
ETPSEGAMIGDYKIPGNVKICAPRWSIGRLESCFEEPEKFIPER\*

>CYP65-fragment3|8617|Grasr1

MKDPSSGTCVDIVQWLNSTTFDIVGDLGFGESFNCLNSCYHPWVALIFNHFKASALVASVRFYPL  
VESLLMSMLPKSVMKIQKDHFFQQVVDKVVHRRMNLEVQRPDFMSHVIRHNDKGMSLSEIEATFNI  
VTVAGSETTATVLSGTLNLTANPSTLEKLVDEVRTSFSKDEDIKFDKLRSLPYLNAVLNEGMRCLP  
PIPAGLPRLAPEGGDTVSGIPVPGGTHVSVHARSLSRDPEAFNGPLEFVPERWLDSEKCKASSPFAKD  
QLQAVQVFSVGPRQCIGKNLAWAELRLVLARLVRTFDIDSVEPKGRSNPKWDDQKTWMLVEKQP  
LHLRLKVH\*

>CYP65-fragment7|9616|Grasr1

MLKDLKKDQNFISIERVHERIAQGVIRNDFMSPVLNGQVTLPIVNRKWLIELGSETAAVTISCALYH  
LALNPAAMQKLVEEICTTFTADQVTMAATQDLPWLNAVIEESLRIHPPSAFNQARIVPPGGAVIC  
NESLPAGTAVGVGTYYAFLSPANWIKPNSFMPERWLGEFGPDDRSMQAFIIFDQIDKGDSLAYA  
ELRLILTLILNFEWELCEESRDWKYQRFYLLWERPPLMFKISKRGLW\*

>CYP6174-fragment1|9742|Grasr1

MVGSELCRNDTFIRESAAYNQSMFLFGFALLKLPLGPLRERLIKPLSYFQRRRQAKVIKMPVAPEVAK  
RLDERNKGTTPKLPRHDFIEWTLNILDEHPPSPNHTPEPQRISHEAMLVGLALNQNPSTVTVQMLF  
QILEEPQYLQSLRQEAENALQEYGWTDKLTSAALPLQDSFIREIHRLYPTLTHINKVSSQRTVVGNPYT  
FSDGMVLPESTRICFPASPLQTDPTHFPNPLSFHGYRFLKLAESKNNSNDSNTLHKGVNTWAAHH  
PSPTNMTFGYGNHVCPRFLAIRLIKIFTKVVTEYDFWWDREAGKGQPSRFEFEGTKIPCPRQRIWL  
RKRGEVEEER\*

>CYP6259-fragment1|9869|Grasr1

MDVYCVQHDAIWGEDADEFNPQRWLREDRPAYETKWQYEPFLGGIRMCPAQNQVVTQLAYLL  
VRWALCFERMECRDQVEGYFEREVDYDC\*

>CYP5168-fragment1|11213|Grasr1

MNVRVESKNHPSDTIALTLVFIFYELALHPEVQYRLFSELCEGPLNDFNALRSLPYLTAVINEALRLH  
PAVPSGGYRVTGPGGLLVAGEHIPPETTISGPRWSLARHS\*

>CYP65V-fragment1|12098|Grasr1

MILIIGGETTATLLSGATYYLLSNPAKLAKLMEEVRSTFSSEKDITINSVSRNLNYMLACLNEALRMYP  
PVPIGLPRIVPKGGARIAGHFVPENTTVAIHHWATYHVAENFSHPFEFHPERFLDDPEFAEDRLDTL  
QPFVSGGRNCLGRNLAYTEMLILARVIFNFDLKLAEESKGWAEKQKIFNMWQRGPLNIYLTASP  
RGGAN\*

>CYP65-fragment1|12318|Grasr1

MEAVIANITWSKTIWAVGIACFVYSLGIAFYNAFLHPLSKVPGPKLRAAFYFPEYWNIIRENTVPAWK  
ALHDQYGPVVRLSPEAVSFVTPQAWKESNDEDHARIRKLLSHAFSETALREQESLLKEYFDLLVHQ  
LRRQVDGPESGEVDLNKFMKLITYDVVADLALGESFDALQSGQYHPWMQAFKLSFRMLRFARLG  
HQYPSFGLLLKIMSKNPRVARMRNMIFGFTQAKTEKRLESPTQRKDFMSYIQGYNDERGMTKAEIL  
PTAAILVNAGGGTTSDSLAAALLFFVLSNPSVHSRLKKEIRDTFQSEQDINLSSVGQLEYLKAVIEETFRI  
HPPAAGVFERRTDTASELIDGWVMPCNTSLGVHQWSINHSPDYWHRPDEFIPERWLSNTPKEYQK  
DVKAAMQPFSTGPRNCIGKNLAYFNIRSIARLFWNFDMELMAQSLDWDKRGTFGTVWEHPPLY  
AKLSHRKI\*

>CYP52J-fragment1|12675|Grasr1

MARLRHEINEVIGDSDQPTREDIRKMPFLSYVIKESLRLYPPVPLNNRTAVKTTVLPTGGGPDGNP  
MLVRKGEMVTFSPYLNSRRKNIYGADVDDFRPERWETGELAKIGWAYFPFNGGPRQCLGEDFAIM  
EISYTIIVRLQAFPIKLPKGAIVEPVGTERQRLTLVLSSADGCKVTVAQS\*

>CYP5987-fragment1|6198|Grasr1

MADEFAVGPIRHDALAPLLGDGVFLTDPDHTSRNLLKGIFGNVYSRDAAQLKKHVQRLINQIP  
CDGNTIDMQPLLQVATHESSDRANETSRLDAFNKALQMAGLRMFLGKFAFLGSGKSMRSCGQ  
VHRVVDKLIDEALDPRGLKSESQSKRKSFVQDLAKEVPDRVKLRYELLNVLFPARDTTFIALSDVLF  
QIARHPRVWTKLKLEVLALNEPLSFQAVKSLVYLRCVMNEGEDPIPIPKVEVADVLLRSPLDPSFW  
\*

>CYP52K-fragment1|6707|Grasr1

MFGDGIFTQGDEAWRHSREMLRPQFHFQYADLEVFRQSVDDLIGDIPQKGGVIDLQPLFFLNTFG  
QSIQSLKTPESAGEDTFAASFNLAQEYVVKRFRLQDFYWLIGWKRFRNACKHVYDFADQIIDRNLS  
KESNDTADDKRYVFLRTLGNIPSWDVLRGQIINILAAGRDTTACLLSWTFFSLVRYPRVMEKLRAE  
ISKNVLKEILRLYSPVPVNTRLVRRITLPAGGGPDRKSPVLIPKGTAVAYSVYTMQWRPDLFGMDA  
EIFRPERRDEEDLPLNRNETYAKWGYPFNGGPRICLGLDFALTEAAYTVSSSQE\*

>CYP52P-fragment2|10180|Grasr1

MVVLCGKSLEELQLTESDDGEAFAGAFSYARHLHETVDRIVASALHQHNTSKSVQQDSDRYVSLDS  
LISSTQDPTVLRDQLINILLAGRDITASLLSWTFKCLARHQHTQSALRRECLNLPSTRTNSLPTASEIK  
RMRLNNVLSETLRLYSPVPLNSRAALKTTTTLPVGGGADGRSRIIVRKGEAVGYSLHSMHRHRDIYG  
EDAEFRPERWDCEDEGDEGDGGGGGGGGGGKFAKKLGWAYLPFHGGPRACPGREFALLEAGY  
AVVRMLQVFERVEEVEDEPQWDRHTLTLVLAPKNGCRVRLGR\*

>CYP5042-fragment2|7370|Grasr1

MNSMVPNSNPDAFAFIKAFDYAMIGLGQVRVRLGRLRFLHRDPKWHASIHVVHRQVDRYIDNAFA  
QIDAEGYHYAEKIQAEQRYILLHEMAKQTRDKEDLRSQILAVFMPGRDSVGFALS NVFHALARR  
PEVYKKLRDEVTTYAPASTPITFELLKSMKYTQWVINEGHRVHPTTAQAPRVCLRD TVLPTGGGPSE  
TSPIYVRKGDHLMVSMWGLHQDTSIWGPDAAEFRPERWESTRPIW TYIPFLGGPRTC PAQQMVL T  
QEAYVLVRLVQA FERI SRDPHPWTEARRIGFLSKYGVKVA VTPADGGLEGKREEMV\*

>CYP65U-fragment1|99289|Umbpus1

MVTQVASFTCLASRKWLKTIKQAWSVALALRFAFFILTGCLDQDPKNTDFNSIRWIRSTKSSTTYFH  
PLAQFPGPRSWASRLPFIPSLLSGTLVKDIEKLHREYGPILHIAPNEITFAKAGTWADIFSPRPGYLHF  
PKDPLWWARQPKQPELLLSVPTAEGHARMRKLTPRFAECALNTQEPVVQKYVCLLLERLERSA  
APNMAGSEEGVVLDPWFYDTTFDIFGDLGYGESFNCLESSRFHPWIALLFNSVKVASFVIAARYY  
PLIDFLMKCILKSTMTITDGPLSADRGQGATPPQLGG\*

>CYP631-fragment1|99305|Umbpus1

MKHCTQRPATAWTFSKATAGSDFVSSVMRTVIVNLLVQPHTPEKLYDKLRSVDVSHPCYKYNELH  
KLAYACVREWWACIHCLCCRLSASYQREPSRSSGVYLPATLLLEVYAINRHKLTFGQDAEFSRPER  
WLENDDEHQKKLEQSM LTVSVMELFLSPFYIHSPLTFANALISCLAPAGAPLWAGTSGL\*

>CYP59V-fragment1|102032|Umbpus1

MAYHILDGHYRLYLAIIVVAVSVLARFLVSLYKTRRAFLRLKQQGLCMPYPYNPLFGHLLVQSILSK  
IPSDAHPYLPDQLRRKYPDMGRVFYLDMPWFSTPILFAESPSAAYQLIQEHQHPKADPVRKFMYP  
TKNKDLVTMEGQSWKDWRAVFNPGFSANHLTKLVPRLLKAVSTYS DILAEHAQAKDMFYLERITI  
GEGYLFYPNKSQNWYYLSKMRPNEVFLMKQSDSRKERAFAVHAAVVDPSAPESVIPHKMSHSLQG  
LGQIVKLKGAENYEA WYKSTRAIARLNGVWELFTGQTVKPTPPAKPTVPVDDPKYGP KYEDRQDL  
YEQKLDKYNTKYGRTRLRLKMTLEEAPKDQLGELILESSKEQMDFLKQKYEVTGYTAVYQALGKIW  
KNRTAKDYSTPIEFANKIKKAKT\*

>CYP50334-fragment2|100088|Umbpus1

MDDVLTLLSRAGPNHRLVRAFEIDNAFTTTDKSFYRKFM SKARRLVAKDEPTWKLMSDLMRDHV  
SFESQSTTSNQSLPLVPLVQAAVLKITMYTLFKSPA EKLEAAKIRLIAERINRLWIDSKSTHEPERFQED  
RRELRETVHTILSVTRVDMDRNNPLNLILPAYETLWRVVLRGFLEVTFRGAEAGTEWRQLLKTFLA  
DPTLSTFKRTNDLTGISVAFIVAETLRLYPPTRRIRYDTKPKVKDDPPAHFAADIEFLHRDAKIWGED  
SLSFNPSRWKDVSKKCQDAYMPFGWKPFCTCKDDFGPRMIGLAVAALVAEFEHGW TWRAARSE  
DQIDVDGPLEAERDSYVTLQLAKRE\*

>CYP682-fragment4|101500|Umbpus1

MRLSRIDPEKPVIIYTDKATDKQYIIAPGTPMSMTGVLIHF DENIFPNPLAFKPERWLPSPD PWSNDIVE  
NRKKYLVPFTRGTRQCLGMNLARDVRMDGDRGYLELFEFDYERDLKIVGDGALPLYGVE

>CYP6421-fragment1|102031|Umbpus1

MLSYSISLLAAHPEVQEWVAEEVHYVLQGGQGTSETWEYSLFPRLKRCLTVMLETLRLYPSVGSIPKY  
TNDRAQSLNINGEVHIIPPKTLVFLNSFAMHKMPRYWGSDSLVWRPSRWILPSCPGTVSNGASLSSG  
IIFDKETLLEPKKGT FMPWSDGPRVCPGKKFAQVEFVAVLSTLLRNHRVRPVARDGEKEEDAQQRIL  
DVVADSGIHFTLQMRHPTRVTVSWVSV\*

>CYP5076M-fragment1|102735|Umbpus1

MFIAADVAFRVQH SVIRLFVHKRLESIGYQDRQLAQLATIGRQP VNVTKWFNLYSFDIMGDLAFAT  
SFNMLESTEEHF AVKVLDKGLEPVGWMLPTWMFRLLVAIPGLANDFVRFENTMTVNTPDVIATLL  
GPWKEKTPTAGSDTTSATLTHLFYELAKNPDHVLKLRDELASHLSSGSDLSHQQIKNL DHLNAVIN  
ETLRLYPVAPMGIARLTPREGIEIEETYIPGNMKVSCPYVIGRREFSENIYADAEAFIPERWSKPEMIK  
DNSAFAPFSTGT YDCICKQLALLSLRTVIAKLIMDFDV SFAPGDNGKYFAKN TTQHFTWGLAELNL  
VLTKR\*

>CYP5180F-fragment1|103830|Umbpus1

MVARLSLAIIPSKSGWEEDDELKSITLPYNMIKSSEGSSYWTPTTLTQAIAGSWFAGSHQPWINLHFV  
FLELCNRDPDYADLLRREIAAHSSLDVTTTTLLPLLD SFIKECLRLNPLDEMGI RRKALEPFTFSNGG PSL  
AVGDIACVSAYDILHNTAKYSPHDFDGMRFVQNSTEAPATSEGMRGTYLTDASKDWPIWGLGSR  
VCPGRWHAALVLKMAVVKLLANYEFRLKDEKARHKWWWET FQLPSGGTEVLFRKRGESE\*

>CYP51F-fragment1|106667|Umbpus1

MVIGMLIAGQDTSSSIGGWILLRLASRPDVQEELYQEQLRVLGPDLPLPTQQACGRFSLHRMVVRET  
LRLHAPIHSIMRAVKSPALFPTRASGTFSE\*

>CYP548AJ-fragment1|107345|Umbpus1

MGEFGFATTNKAGVYVQYPELANLKLEKLLYQRGLGMRERYLQMSNLVRSRNSKEKDAKNDLL  
YFLADAKDPETSLGFTEDIWAESRFLLIAGADTTSTALTAFCYLSAYPACYEKLVEIRNTFSSGSEI  
RSGPKLAQCQYLACIDVSLRMSPPISGTLWREVCAGGYVIDNEYVPAGYDVSVNPNYAVHHNEDC  
FPDSFTFKPERWIPADNPEKDIERARRAFSVYSIGSRACAGRNMAYTELGD SIARTMWWGRNICNT  
RGPNI FVTAGFKICEASALLSIINTAAISSKAIISIASKYKDAREQIQAFGCEVSILGKLLDQLHRRLSNP  
SWTVEEYVKLLTDQIIDECINIFTQLDTFKDNLYAKPADLEPSRVSLKGTTKWVFKSTELEFLRARM  
SMKINMVLIMAMAMPQRQEQPSAESNSEKREHV KQIQMLTAQSNTCLERLESLEQRLTVDDNFGS  
DDTNSVATFQTTRTSQTIRDNLLQLSRAMPCALELGLTDNLPKTAIGIDDSLNTSDLVERFLQQQE  
EAASACAENDLVKRFLHQQDEATTTCSENDLVERLLDQQDEAATACSENEQACSRPEREVDLSTE  
DDKTSSSVGPYRLKADSIAREDLQKGNKSKLRFIFCNPEAGILEAKSSIWYHKKLATRMADAGDQQ  
YGIFPIPPRTLIDFQLYRRGAPVENGRVQLYRYYSVDLSKLGAYAIAWRRYVGQIKHLVVEDERPGDL  
PVKSIFIATFS\*

### Partial P450s

>CYP50334C1-partial|121516|Acastr1

MHLLLALLTPVIFCIAVWLIQTLEYITIWKHANGSSKASARPKIFPTTQDISNSARKPLKSRAIPNQRL  
VRAFGIDNAFTTTDGDYIRAFRRRVELLLKINDEQWTHLAHTATDLARSLQACTPEYDGT EILLV  
PFVQKMVLKFSMHVLFVSPVDELDDDVVATIAEKINSLWISSKSAQPTKSMRSDQKELRAALQRIFP  
RVGKTARENPLNLILPAYETMWRVVLRCFLEVAFRPHNHQNTPVFRQILARFLADPSRATFGSTTPE  
TGGLSAAFIVDEALRLYPTRRIYRQQSIAGRPPALVAADIEHLHRDPRIWGEQSSSFHPSRWIDVSD  
ECRRAFLPFGSKPFTCPAKGDTGPRMIGVLVAALLAVFGDDWVCGAEHPEDVIPCWEALSAGRDC  
YGTLVNLNGPFT\*

>CYP5334A2-partial|125949|Acastr1

MELLQGFPTVMQNVLSTFKSGTLSQGRRISGPKWQFPNGQILDKFVNNGRAKSDREWREKYGDVYRV  
WGGPSPEIVITTPEDLRTFSLDGEKHGKHSNLGWFLDQLLGRICGFLEGDEWKQKRQIFYPAFSDHG  
TATRIDLTESAARKFIEDLPSMHSDGLGTNGGGKTISFHIVNGFRKFPLYVTASVIYGAMTNAEKDD  
LWALAEKRLALWPYAVIGGPYRFSWGSWFDRTTYNLLNEYTTEWRNYNDRMVQTRRARGIKTPL  
VLFYDAYEAEDVTLENLMHSLDEIILTNLDVMVHAITWVITLIADNKQVQQELHDEVDASWDRHLH  
DYLKSDTHLHRSFMETIRLRPPASEDILYILFNIGESSPSVKNFNGILVKPSTMVLVDVLGINVRNPF  
WGSDS

>CYP51183A2-partial|6920|Dibbae1

MGDLIWLMLLIGVLVYLFPGPKLAALTDYWELYQDFFREESGYLFIELDNLHEEYGILPWNTSIDFR  
MHFYNVHAGPVVRIRPNEVHVKDSNWMDVLYTGPSDPRDRDPLVAIGTGPHELHRIRKAAINPVF  
STRSIVEMEPDVQAHAAARLFEDLEKRVGEVLDMRIYFFAWTTDFITNTIFRNSIRIFWEPERATRWFM  
IVWDFSGKFPLMKHMPWLVTGLGLPLTVWKVLFPSLVPIYSIKDLLVMATKAFSDYSEEANRKL  
MPQEATTKDIFETILSSSLPFKEKQPKRMANEVFNLLIAGSLTTSKTAVVAMYHILDNPEVYKCLKAE  
LLSEIRDKHALPNVKTQLKPLMLVMRCYPFERPIF\*

>CYP5105E3-partial|1062|Dibbae1

MGGTLNFDLHRKRREALNPFFSKKGVLELEFMIGQKVQQVCQLLESHIKSRTPVNLSDVYYAYAND  
FGHDNNLLEDEATSSTQRNNLSRLLLGKVNQHFPWFLDLDVIPFPIAKHIMPPGAIDMTHFVEM  
CIILKITQNIIRREVGQVLQDKDNKKTDRRSIFYELRDNP NLPPSEKSLSRLEQEGTLLVMAGTESTAKS  
IAIAHFHLLNNPTCMVRLRAELRTLPSDATWSQLEQLPYLSGVIAEGNRLSFGVTARACRIAPDEAL  
QYGYKTIPAGTPVSMTTLSVHTDESIFDPWKFDPERWIGPEGTERRKYQMAFNKGGRICGTNLAN  
AEMFLVLAABAQYDMELFRDLSDVQFKHDFHIAYPELDSKGARVMVRGKAQMA\*

>CYP6712B1-partial|5873|Dibbae1

MASVRRQLQPIQERIDVLLRRMKGYKDSGEVLNASCMFAALTNADIVQPDVVM TYSFARCDYRLE  
APDFDPSSRDASLAGATSGAFLKHAPWFNDLMQALPESVASMLNPAIATFVAQKRNSRAQVLEIV

KGQNEKWKDREHPTIFHSVLGSNLPDEEKSMARLSDDAQMLVMAGTLTTSATLELIMFWLLSQPA  
TLQKLKEELTAAIPNLEAVGSIPLPTLEGLPYLTAVIKEGLRLSYGVSCRLARIDPDNAIIFTDKDTGK  
KWVIPAGTPVGSTSVLIHHDENIFPDSKKFSPERWLDGKGRELERYLVSFCVGSRKCLGVNLAYAE  
YLALSAVWRQWGSQVDGIRGNDDMGVMSLWETGLRDVEIESDAFVPQPKGSKGIRVLVQG\*

>CYP676D1-partial|9763|Dibbae1

MDKGPWYDIMAIPDSRFPNQMSERNAKRHIQKQKNLAAGYSLSNIIKSEPYIDALLHLFRCRLSALA  
STHSPVDWDYWL DYLAFDVVGEVTFQKQFGFLAEGRDIASAIANQTVLTIYLAVMAYFPWAHNYL  
LANPLIEKLGLQPAMHILDTCTAAIKHRSSNDNVRKDMIEQWLDQHRAHPDRMPASEIFA VVIT  
VGAGADTVSAALQALLYLLRTPDALALLRDELDAANLSDIPSFAETSTLPVLQACIKETLRIHAPIA  
VSLPRVAPPGGITICDRYFPAGTILSVHPYALHNLP AIYGPDFATFRPQRWLPKDALKDASETLKAM  
DACLIPFGTGYNGCPGQHLARIELCKTAALIVRDFEWQQVVPGRPFRCAYHF AA VPHGWPCFVRR  
RQGGGRAVDDGEGMNGNAVMGNGSGGMGKS\*

>CYP570H5-partial|10012|Dibbae1

MSLLPKVALFFDAAVQRSFQSPTISCMILLFCVAFYRLSTRRFLHLRKIPGPWWAPYTRLWLFKTLAS  
EDSPNRYIQVNEQYGPLARIGNHLLTNDPSVFRKILAARSNYLRGPWFDSLRLDPNKANLITEKDL  
LAHNTLRQQMATSYDGKDIEGFEEGINESLQEWIQFVGEHGVSYPGSPRGEFEIGRSIQYLITDMICR  
LCFGRPFQFVAKHADCYDFLKTLEERLPIVEKFSIYTEVSTLLSIYSIPLLNRLVPSVRDRNGIGKII  
REVIDERFANGIHTKNDMLGSFLKHGLDRRQAELEITISL FAGSDTTATSIRAILLHIVTNPLIYNRLRL  
EIDTHIANGTLSSPAREEQVRNLPYLQACIREGLRIFPPITYLRERVTPPAGDTLSGFDIPGGVNIGFNL  
PGLLLNRVFNPDPTVFRPERWLDGVEPGHLREMERVMELVFGWGSTRCLGIRMANTNQSKFFVEV  
SYLTRAGGSRGVD\*

>CYP51159A1-partial|10280|Dibbae1

MLAGPEVSRNEDWIMLQLDFAKEFVAAASQLLQYPIPLRPLITPFLASVRQTWKYQATMVSFLEEY  
KLKTEAAVKGGAPPNTLAQWLAEEHNDGDKQASVQHQAANLMLITGLDCIYTVSQLCTQTLAPP  
VTETRKDLDLTHILTA AFQRKALRPVTLSDGTTLTPTGTLFFVPNCAYSTDPSAWESPSTFKGRHISS  
TDNTTSSQAQSQSKEATDSQQHGQHFGVPHLRELTFGIGRHACPGRFYAVAEIKMVLAMLIRDYD  
VKLVEGKTEAPKATADGWL VFVDESEELLFRNVVPN\*

>CYP51156A1-partial|10704|Dibbae1

MVENEDKPASFGWISRLSEISVLVWVPLLLCFWIFIQLSLIVYSVYFGPLSDIPGPKFAALTDLYESYA  
GYRPDFYWRDVQELHKRYGPIVRISPNEIHLDDVGFSEGIYPTIKDLDKDRKSGLLLRDVGQSAA  
RRLHRRVGNVSSQNTRNKAASHDTETLWQMMWEFSRRKEAVLSTVVSKALARNIGAITDETVT  
VIENVLHHVFHNHTVLH KIETELVESVELADHALLDDEKLDQLPYLSAVISESLRSIPMCVTEITTVL  
D TDMIYKEIIPTGVTISMTLADVHFDDQQYFPAPRTFHPERWIGPDVILSREFDPKHCLGMLDLEFAR  
PGISVLRLLLKDIILGLCIRSFLLSEQ\*

>CYP6845B1-partial|12083|Dibbae1

MSLEMFGHSWANFIGFAILFVAFKIFYCITLVAYPVVSDDITHARIRKLLAHAFSEAALQEQA PLLK  
TRVKELIDQLDLHLSIAKVNVDLNMWYTLLAFDVVTDLSFGEPLHAVKRAQRHPFIEDFFASCRM  
YPMIPLSHAYVSMGLLMLKMLKIPAFKKVQDKGYMATKERVEKRIASHSPDRKDFMTYILRHND  
RGMTKKEIIGSTAVLVNGGGESVAVCMTAATFYMLKNPAILTKAQMEVRNAFSEQDQITLRTAAR  
LVYLN AIIIEALRIHPPTPGNFSRRTGPSGDMIDGHFVPPNTSVGVHQWSANHSPINFLKPDEFVPER  
WLAKPPEEYRSDSRAASQPWSIGPRNCLGKNVAYAEIRSTLAYMLWNFDMELCSESKNWATNQRF  
DITWDRPPMYVKLSRRQTA\*

>CYP5589B2-partial|12084|Dibbae1

MYASDRMVDIVKKGINPQLPQLTPILMNEINYAFQKELGDFSGWKEITAMSFFGSAHRTASRILIG  
EELCRDEKFIRLSMDFVMSIFVTALVIVKLPLGPFRGLLAWPLSLLHRWKLNRVLTILLPIVKARMGA  
RAATAEKDIAPPLDAIEWTLAFSKPDSPNNTPEYVTKELLHNLWAGSSAPGGLMTEMVYQLLLEPQ  
YLEPLREEASNALKAHGWSEKTLDSL YLQDSFIREVNRLYPTGSVTCRITLDPFRFSDGLTLPIGSR  
FGFPIKALQNDPDNFPNPDTFDGF RFARSSTSENHIDQNSRRWGAASMGTTNLAWGYGNHVC  
PG RFYAVREVKMVFTKLILEYEIKWASPVAVRPPPVHVEGQFIPNMGQKIALRRRVE\*

>CYP6267B1-partial|9134|Dibbae1

MHSGPIQLNKSIGTVSHSLHKTRRTALNPFFSKRSVVELVPFIQKLNDKLCGRFADAAKNREQVNL  
KYAYAALTMDVMSEYCFSRDLKTVEKSDFGRKSFDDVDFLEMSLIDWFSRLTSPAMAGILDLRDG  
LAHQVEAIRAGKDRSYENSGHRTIFHDLLSEKLPPEEMTRDRLRDEAFSLMTAGSGTSAFVLKSLSY  
HISANPTIQETLHREICTVMPHPTSHADLSDLEKLPYLTACIQEGLRITHPVSHRISRAFPEKDLHYKQ  
YTIPRGTIVHMTAMLIHENEDIFPEPKTFRPERWLSPPPTKYLVSFSRGTRACVGINLSYAEMYLILA  
SVYRRFEFDVSRVSRERDVEVHRDVIMAVARADSEGIVVGVKEITD\*

>CYP6456C1-partial|5964|Grasr1

MSSXXXXXXXXXXXXXXXXSLLAPRGSHARSTLAAAFEKYFEAYEPTTSSSSAMIRARHHSATTYGITPL  
NQGKLEVGTLLGILANTIPSSFYMLVHIYSDDLLADVRAELERKCVEIEKYADEDAEKKEGENKRG  
DGREKGIGSDSGPEEGSGSISESTRGKADGRDSPTRITSMRANKRLLNMLSLRDKTPLLYSVWQELL  
RVHAQGTSSRFVREDTLLDNGRYLLRKNIVQMPMAVMHSDPKIWGDDAGVFRARRFLRGEGBA  
GAGGGRGKEARKGGGGGGGGGGGGKVGREGGKGRAGGSGGAAAGKIGSGKISAAAYRPFGGG  
ASMCPRFFVAWEVMALVAYLVLRFDMPVPLKDHLKGGEREKGWEVPRQKQESLATNVFPPERD  
FRVRVLERKKGWEGVEWGFVKR\*

>CYP5238C3-partial|1146|Grasr1

MGKVIVPEYMCMDMGMISIVPEYMFLTPGVAAEIDFGFARSWGHDLEWKEVRVWTSALRIVAG  
AANGAFCGPPLLYSLALGRDVAFLDKMKDHAMVIFAGALVLNSFPDSLHPLFGPVLSWASGFMG  
KRAIENSLPIVEARLARTARWKAEPDCGWTTPNDALQWIIDECYASKVPAAQQEPKRNFILNLFST  
DPTLGYYVDVLRHECEEALSGSQGAWTYAAVKEMRLVDPAIRGSMRMNPFGTLSLPREVVHPAGIK  
VPGFDSFIPNGTRVALPAEAIQYDGSYEDAHRYNPFRFARTWDPESNQMKSTVTLDDSFALFGVVG  
RWACPGHFFALLELKIFVAEMLMKYDVAYIKTKAKTALFNVG\*

>CYP5295A6- partial|9684|Grasr1

MPAPIGDDVLSRGMRMFTLPYGPKWRTYRNIVHQLVSSTMTATFIPAQEFETKQLIYDLSAGDDNQ  
LAFIQHIRRFSFSIIMTSTYGNRVNSWDHPDVEFSGRSSRILGRLTRAGAFIVDELPLANLPHWLQPG  
RKQAEKIAVELLDIKMKFWQRLRDQVDAGKAPVCYAREILENSASWRKQGLTDEDAAWIAGGIVE  
VGSHTSSTLLHLIKHLAAYPEAQQAHHDELMRVVGPDRTPTYEDIKNLPYIRSCLKEVLRCLPTPIL  
GIKHYSDADVQYKDYAIPKGTVLLANTSFMHYDPDRYPDAHAFKPDRYLAHTKYSADYAAGGDP  
YERDHFSGGGRRVCPGTRLAENTINISLANLLWAYEIRPPLVHGVEAKGMARRSCMVWKLRGWI  
SVMTRTRRLVFVGRSLMLFALWRGARSGWGLLGGSGRRLVGRDTC\*

>CYP51190A2-partial|9772|Grasr1

MVSISPKDLSTVYDYSRKLKSDLYGVFRPYSRGKVLTMGMVALQDESYLQMLRQPFASIYSYHSLTL  
VESHTSTVRAFFVARLQNFARRGKQDFGFWLQLFVFDALCEATFSKRLGFLDEGKDVGDMLALV  
WKQFHDGAPSNAMDGQYLEKESAHTSALAEFPDDTNSTICIGALITWTLGGIGAGGDTSVNVIRAL  
FHNLLTHPLTMDLLRKDIHLGIERKGRDLTWQEARNLPLYLSACLLEAARIHPSIGLHLERIVPPGGV  
TVSEVYLPPTIVGANAWVVNRNIEVFGTDADIWSPSRGVHRDG\*

>CYP51162A1-partial|10339|Grasr1

MAAQFKEEFEHNRVSNFALHARRFMLGSLSLFGDNYFVQEGRYDPDTLLAAARGAAIPFCLTA  
VFPYICVPLMRIHILKRLIPHEEDARGFGVMAHFDRSIKAHNKQSGECILTNILSAHNPTKELPVT  
PADIKAESLLMSASPDTSPLASALLASLIQNPPSKTKVQSELNQALKSNTIQPNIPPIPIPWTSLSHF  
PYFTACLYETARLFPPVVSILPFSAPDSGLHLPDGRFVPGGTAIGAAAGVINRNKTVFGVDADMWR  
PERWLGGREEVAEMHRYLFTWGFGARRCTGQKITVMLCGKLVQLMLRELEIEPAVGDLDAVRKE  
GMGFALYDGFYVKCRPR\*

>CYP5168M1-partial|10359|Grasr1

MLYAKRLESQVTAHTGRVIDASRLAYEFSFDLMGDFAFGRSIEDSEQQEWQRQAIVALKQGMAMLG  
PWSPVPWLVRGLFALFPFVDPIRSFNRELDWCKDRMKERLQRTVDKPDISHYLIEGALKHGLASLDD  
HHWQGDAMIVAGSDTVAPTIIMSLYLLATNPPIEQIKLRQELRTVENPYEPPELLRSLNHLNGCIEET  
LRLYPPVPTGGYRKTGPEGLTIGQTHIPAHTTIVAPRYNLGRLRSCYKRPYDFVPERWYSSPEMIRDR  
RGHVFPNRRGRYSCVKGELALTEMRLVLALLVSRFKFKLADHSDGSNVLVEMKDYFTIQPGKLDLIF  
EKI\*

>CYP51169A1-partial|12959|Grasr1

MLKIVGQLTSRIFVGEELCRNDEWLKFLVEYAELAIIGTTALQKYPSTWTHPFMAPFVPEIQDIHRAV  
KAGKGMLWPVLRERQDRMTNEPDWVPPEDFLTWWAKSSKDGWDPSKHIQAQMIGGLASLHTTT  
TVLTNTLFDLCVNPMSMLREEYTSVQNSGQDMKHMFTGMRKMDSVIRESMRMHPPLVLSIQRH  
VSTDIRLSDGNVIPKNSFIGVPTYVMNFDPPQVYDKPEVYDGLRFEKIRDEANQAGNAQKDTRAQLT  
STSPEFLGFGHGKHACPGRFFAANEIKMIIGHLLTEYDFKLEHPEAGRPKSSTTKANISPDHKKARLLF  
RKRRETSF\*

>CYP548AJ5-partial|13026|Grasr1

MVPSPGAYNIFTVVDKSMHRHHRKVLSQLGFSRDCIRAFEPTILKHVDIFVEKLFARPSPLSPAUGLPF  
ASKDDEGWSAPVDMTLACRHLGYDIMGAFGFGQSFDLQGSCKNRFLIEAVTATSRKAGVYVLYPA  
LQKLQLEKLFYKGLVMREKYLMLAGLVKNRKQQEVKGAETRDLLGLKDAKDAETGVGFSESE  
LWAESRFLLIAGADTTSTALSAIFFYLTLPSPPTPCPSPLARLTYEIRSTFPTHASINSSHLSSCPYLR  
ACIDESLRMSPPISGTLWRTLTPSPDSSSITSQAHSPSLPHFCHPQNNSTHITIDNQPLPPNIDIGVSPY  
ALHHNESLFPDHGSFRPERWLSDLAHTPEQKQQLARARQALI\*

>CYP51183B1-partial|2704|Grasr1

MRKAAINPFFNAASVQRMEDIIYQHAELFENLENSIEAVIDIRIYFFAWTTDFIINTIFRDNTEIFWD  
PIQASAWFQIVWNFSGKFPLMKHTPWLQLFGLARKAYADNEAEDGGDPKTEAEGSKDIFQTILTSN  
LPEIEKLPKRMAAEVFNLLIAGSLTTSKTSIAIVFHILNNPEVLQSLQEELKQAIPDRQAIPSYRELQK  
LPMLSAIIKETMRIADIVTTRFPMIAKDKVLEYKGAIIIPAGVGASRKARSKMALTPGMYSLPSA\*

>CYP51185A1-partial|3341|Grasr1

MPKPSATPRRRLMSPLLTKSTIQSSTSLNHLLSRILGARLLPLLRSSSTQSQPLNLLRQFRNLAMDLS  
TWTFGLNNGTDFLTDTAASDRYFRLFDESAYNAFWRTEFPWLTWKVVGVGTGLFAPPKVAEMARRET  
VGWSRGLCERAGGERAGEKEKNLEGGNGGGEKSEKGGREEKETLYLRMRDGLKGIYAGSGKSEY  
VKQELAVELLDQLGAGHEPMGTLLSWVVMELSQRKEWQERLRREIRENPEVLSFLKVGEESLSE  
EGKATQAARALDALPVLDAVLQETLRVYSVNPGPQPRLLVPKGGYRLSMPSKLAIEFGRVGYEGSVFT  
GGHSGHGIELLLA\*

>CYP5042F1-partial|4578|Grasr1

MTTLRMGESTWVLLNSDRVVHEIISKRASITHERPHLPVASGLMSQYQGTILRQSKGWADGRRLMH  
RMLTGTAMKDYARIQESSEVRLLTNYIQRPGAWYSHHYEFYPSIIHRIVAGDNVPRLDKQREEFARI  
TKEFIRGINASLLDFFPTLTLLPEALQPGRRNWEKIGQNHQRMESWWTSVKDNLTSNPSAHSFITD  
ILLKDAKFANDDREAMYLATAIIAAGSDNIRMTLNVMMVMAALSYPVVSQKARAEIDNICGSSDNL  
HLPISLEDLPHLPYISAMIKELRWRPVLPPLIPQHRLTQDLNFEGHFFPAGTDFVVPFAGTDFVVQFT  
GGEFRIRGSWGFQAGTMAGWPSA\*

>CYP6259C1-partial|9868|Grasr1

MTNMQALVYAAFAALAIYLIWQYWSFQVRRNRLVRLKGCEPATRYPHKEPFLGLDFFYNLQVAD  
AAGHRSPAYLDLHKKYGSTFEVKAFTKQVETAHAENIQAICTTQFEDFGVEPFRGNVAAPFMDR  
GVFMNDGEYWKQSRALIRPIFNKAGIADLDYFELHVARFLKLMATDGETFDVLPFAKRLFVDSASE  
FIFGRSTNTLVPNPPKELIDFMAAFDRALLGTALTFMLGPLRWVYIDPYWIQAYKTVHRFVDSRIQ  
QILQERKACLSSNPENKPSAIAIDEKKTKAERYVLLNQLVEQTQDPRELNRNIIINIFSPTRDTTALAFC  
NILFYLSRNPWSYNKVRSEAVPLRHTHLTYDVVRSLKTIKAIIVTEANRLHPAVSRLGRAALKDITLP  
RGGGAPP\*

>CYP51186A2-partial|4571|Grasr1

MITPLFKKAKVRSAAIFKRHVDRFISQIPRDGSTIDVQPLLKKTNFDSTAKFIFATANFIEAFNYANDG  
SLKRRRTGRLAFRYCFDSEYTRTISEVHAFVDKEVARLLNSPPPPPPSTAEKTTKPRRYVLLTELASQIH  
DPLALRSECLNLFAGGRDGVAAPLRTVALTIPEGADPDLDISKILRLFRNVIFETIRSTGPSATVTRTAF  
KDTLLPRDGGRDGDIPCFVRKGDQVSVIGWGRNHIESVWGRDCYEFKPERWEGGERSERMLGGRI  
PAEFVPPFGGGRMCPCGYGQVYL\*

>CYP584AW1-partial|10870|Grasr1

IRWSKQLLKPISTLTDPPQHIQAIYSTDFHSYGVGPLRHFPFEPLIGSGTMNTDGAWEAPRALLRPIL  
TRSQVNDLAMLERHVQNLIRKIPKDSSTVDLQPLFACMDLDYSTEFIFGESVASLTSESTLDAKTFL  
AYNTAQVGIAIRASIPYWNIFHRDKVFWYCCRIVHDYVNRVAQAALLNHKSGTRRPNLDTKHIL  
VSSDPLQLRNQLMNVFLPGHDSTAILISNVFFALARHPATCSRLRDEVLSLDPSAAITADALKRSLYL



QAVINETLRLYPVVTAMSHAALRNVQLPTGSGPANAAPVLLPRGSVVQISYKALHRRRDLWGADA  
DVFKPERRLADAGMDEKKPVPASWTFIPFSGGPRTCPGQQRALAECAVVARLLRTFRAVENRDP  
VWEYHDLYKLVTESKNGVKVALEWA\*

## P450s from the Literature

### Grayanic Acid

>CYP682BG1 (ADM79460.1) *Cladonia grayi*

MLGVIQYSILTIFWLPIAAAXLYGAGLAIYRLFSLPLAKFPGPCLKAALTRKYESYYEAYQNYEYYWKIKE  
LHKQYGELFTPLTASFRRXGPIVRVNPHELHIDDKDFYKLNLSFQGAWNKPYPYTAHQFANPGSIVGTIDH  
DIHRKRRAAIMPFFFSKQKIYALESVIQGMVDKLCYRIEEYGKTGQPVNLRNASKCFAADVGEYCFAESG  
GLXDKPDFAIEEMNQOQGLKAGLRARYLPSWWMPVVRGAPAWIRASIDPAAKHFEVWHRVSDSLFVRLY  
DARKXGVPGRMEKRKNDEFYEKAGHRTIFHELINSPHLPPEEKGTGRI IQEAGAMVGAGGESTSQVITAF  
VYCLLANPQVLSRLREELRSVIPNADSPAPTLRQLEALPYLVGPPLLXSTYKYVGYLTLVARLRTGKIAR  
HQRVPRDRPLYFNEWEIPAGVSXHEDNIPMASTBTAQTICSMTPIFLQIDPEVYPNPHAFMPERWLNLD  
XQRQRLEHNLVPYSKGTGRCAGLTLANAELYMLIPALVTRFDLELFDSDAWDTEMAVDSHHHSRPRDSKG  
VKVFVKKSTF

### Atranorin

> CYP65FQ2 (A0A8F4SN83.1) *Stereocaulon alpinum*

MALLDTIELFSNFSLSGVFAGLVLASLLTTTYCIWNIFYNIYLHPLKGYPGPKFLTTSRLPYLKWMFSGT  
LVPNPFQRLHEQYGPVVRVAPNELSYINPEALKTIYGHRQPGEGFRKNPAFFQPATNGVHSILTSEGDAHS  
SVRRKILPAFSDKALAEQQDILQHFTDLLIRKLRRERVEASKSSEPVDMEFYIWTTFDLIGDLAFGEFPN  
CLEAASFTEWVALVFNAFKTFAFINISKQLAPLDKLVRLMIPKSMKARQDKVFSNLVAKVDRRIASKADR  
PDFLSYIIKKGKDGAMALPELYANSTLLVLAGESESTASGLAGITFELLKHREAQKKAVEEIRSAFKTEDE  
IVPESVKRLPYLAAMVSEGLRMYPPFPPEGLPRLTPRQGAQICGQWVPGGTYYVQFSTHAAHRASANFTDPN  
VFAPERWLGDTKFASDIKEASQPFISGPRSCIGRNLAYLEMRLILARMLWSFDMQLTPECEDWDDQNSWI  
QWDKKPLMVKLSLVKR

### usnic acid

>CYP6309A2 (A0A0R8YXT5.1) *Cladonia uncialis*

MISPVSILASIWDNSKLLLDHTSVLSIALIGVACAISIRSILYVRLACANYSILLTLTHAQRRLRAYSTP  
LRHVPGPWYAKFTALGLRANDVAGNRWYYVQGLHKKYGSIVRIAPEEVAISDPKVVSKVHALGTEFRKRQ  
QPGTPFNIFSI SDPKAHRTRQRFYAKAFSDETLKASTEPAVRQLIKTAVASIKRDAALRKDHTADVYKWC  
MLFGSDVAFQVIYGNSTNTEGLMATQKTTDEVIMGAYLQRMNAWAQFCFPVFLGRWLSPLSPTLHNI FRV  
EEKYGDWFQEGQRQREIAARTVFVQNTKYSKNDGVFSVSDEVKLSVDVIAHDITTFLGAGGEPVGASLVF  
LIWQVLRMPDLQRELEAEVAGLTEPITDATTAAQLPILNGVIYETLRLYGGGVTPMPRYAPIATELGGYVI  
PPGTAVTTHTGALHRNPAAWDDPEK

> CYP6309A3 (WBO01282.1) *Cladonia rangiferina* isolate MI-R-4

MVSAVASSLASIWDSGKVYLERTSLLSIASIGVICALFIRSTIYVRLFCAGRSILLIHRQRLRLAYWTT  
LRHVPGPWYAKFTGLVLKAHDVAGNRWYYVQALHKKYGCTVRIAPEEVAISDPKVVVRKHAFGTEFRKRQ  
QPGTAFNIFSMSDPKLHRTRQRFYANVFSYETLKSCTEPDLRKLVEMAVAARRDATESKDHTADMFKWC  
MLFGNDAAFQVIYGNINGLIANNGTTDEVIMGKYLQMTSWANFCLPIFLLGRWLSPPFSQYLRDTFCLHP  
IYVDLWEEGQRQORDIAGRTVFVQNTKYTKDDGYFRVSDEVKLSDVEIAHDITTFLGAGGEAVGATLVFLI  
WQVLQMPDLQRELEAEVAGLTEPLTDATAAQLPILNAVIYEALRLYGGGATLLPRYAPVATDLGGYIIPP  
GTAVTTHTGALHRNPAAWDDPET

### Physodic acid

>CYP682BG2\_Pseudevernia\_furfuracea

MLGLLKGIFTILWLPLVAVGFYALALAVYRLFSLPLAKFPGPCLKAALTRKYEFYEAIEENYEYLWKIKQMHEKY  
GPIIRISPHELVHVGDEFFDRLNSFQGKWNKPYPYTAHQFANPGSIVGTLDHDIHRKRRAAILPFFFSKQKIYALEP  
VITSMVDKFCDRVEEYRKSGEVMPLRNGFHCFAADVADIYCFAESGGLLDKPGFALSNNMQQKHGHLKSGLRARYF  
PSWYMPVVRGAPEWITQSVDPAAKHFEVWHREVDGPVRRMEERKNDDFFKKAGHRTIFHEVINSPLHPPEEKQTI  
RVIQEAGAMVGAGGESTTQALITMAYCLIASPEKLARLRDELRTIMPNAKSPLPSLRQLEQLPYLTGCVKEGLRR

LRTGKIARHQRLPRDRPLYYKEWEIPAGTIISMTPIFHQVDPDVFPSPHAFLPERWIDIEEEQRFRMEHHFMPYS  
KGSRQCAGLSLANAELMCI PALMTRFD FDLFETDEWDVDM AVDSHHHSPRADTQGV RVFAKASTF\*

The above sequence is retrieved from genome accession number: JAIUPS010000069.1  
Contig: Pseudevernia furfuracea strain Pfur\_phy\_TBG\_2152 contig\_31\_arrow\_pilon  
Region: 29836-31974 (+) strand
