# Supplementary material for: Genome-Wide Analysis of the Cytochrome P450 Monooxygenases in the Lichenized Fungi of the Class Lecanoromycetes
Source: MDPI journal article supplement (doi:10.3390/microorganisms11102590), 2023-10-19
Supplement: s1 [file s1]

Tree scale: 1

### P450 Family

CYP6001

CYP682

CYP584

CYP52

CYP59

CYP65

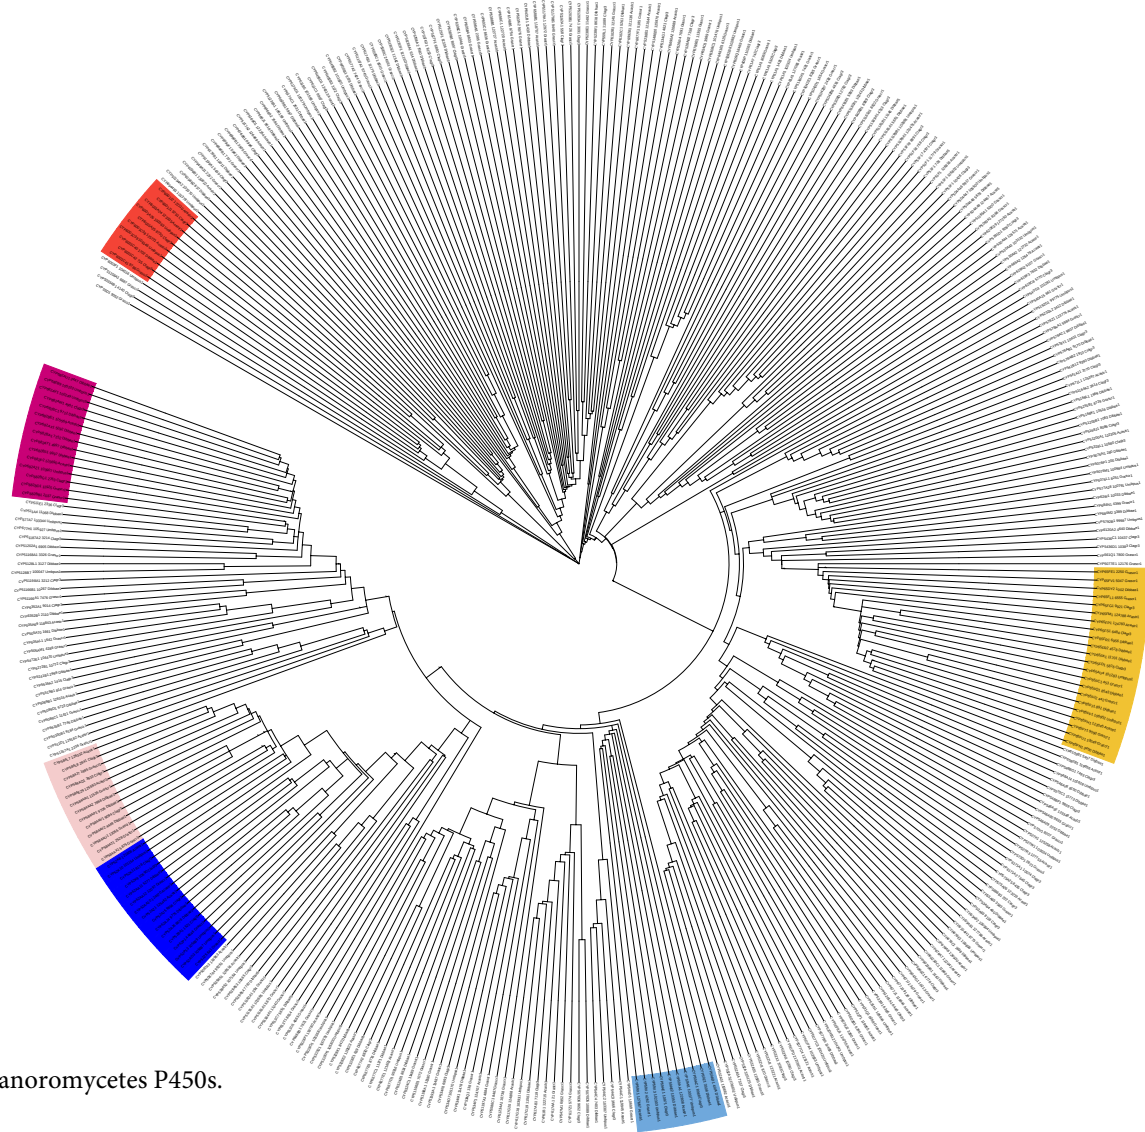

**Figure S1.** Phylogenetic analysis of Lecanoromycetes P450s.
